# Supplementary material for: Effects of metabolic traits, lifestyle factors, and pharmacological interventions on liver fat: mendelian randomisation study
Source: PubMed Central journal article supplement (PMC9978690; doi:10.1136/bmjmed-2022-000277), 2022-12-20
Supplement: bmjmed-2022-000277supp001.pdf [file bmjmed-2022-000277supp001.pdf]

**Mendelian randomization exploration of metabolic and lifestyle factors, lipid-lowering and anti-hypertension therapies in relation to hepatic steatosis in healthy middle-aged adults**

Shuai Yuan, Jie Chen, Marijana Vujkovic, Kyong-Mi Chang, Xue Li, Susanna C. Larsson, Dipender Gill

**Supplementary Table 1.** Genetic instruments in relation to liver fat

**Supplementary Table 2.** Characteristics of participants in the genome-wide association analysis of hepatic fat

**Supplementary Table 3.** F statistics and Steiger directionality test for studied traits

**Supplementary Table 4.** Results of false discovery rate correction

**Supplementary Table 5.** Results of MR sensitivity analyses

**Supplementary Table 6.** Sensitivity analysis of removing SNPs associated with liver fat at the loci-wide significance level

**Supplementary Table 1. Genetic instruments in relation to liver fat**

| Exposure  | SNP         | EA | EAF  | Exposure |       |           | Liver fat |       |          |
|-----------|-------------|----|------|----------|-------|-----------|-----------|-------|----------|
|           |             |    |      | Beta     | SE    | P         | Beta      | SE    | P        |
| AgeSomIni | rs11780471  | A  | 0.08 | 0.038    | 0.006 | 7.07E-11  | -0.024    | 0.016 | 1.40E-01 |
| AgeSomIni | rs11915747  | G  | 0.37 | 0.021    | 0.003 | 3.89E-13  | -0.013    | 0.008 | 1.20E-01 |
| AgeSomIni | rs140485736 | A  | 0.01 | 0.065    | 0.012 | 1.39E-08  | -0.036    | 0.035 | 2.50E-01 |
| AgeSomIni | rs319748    | A  | 0.72 | -0.017   | 0.003 | 3.01E-08  | 0.004     | 0.009 | 7.90E-01 |
| AgeSomIni | rs3768886   | C  | 0.33 | 0.017    | 0.003 | 7.50E-09  | -0.003    | 0.008 | 8.30E-01 |
| AgeSomIni | rs624833    | G  | 0.33 | 0.017    | 0.003 | 8.75E-09  | -0.004    | 0.008 | 5.50E-01 |
| AgeSomIni | rs7599208   | T  | 0.57 | -0.020   | 0.003 | 1.70E-12  | -0.002    | 0.008 | 7.20E-01 |
| BMI       | rs10920678  | A  | 0.43 | 0.015    | 0.002 | 1.25E-20  | -0.001    | 0.008 | 9.90E-01 |
| BMI       | rs11121210  | C  | 0.59 | 0.011    | 0.002 | 6.60E-11  | 0.012     | 0.008 | 1.10E-01 |
| BMI       | rs112566467 | T  | 0.20 | 0.018    | 0.002 | 1.77E-14  | 0.010     | 0.010 | 2.90E-01 |
| BMI       | rs11577094  | T  | 0.05 | 0.019    | 0.003 | 5.65E-10  | -0.007    | 0.014 | 6.30E-01 |
| BMI       | rs12049202  | T  | 0.18 | 0.024    | 0.002 | 5.20E-30  | 0.018     | 0.010 | 4.80E-02 |
| BMI       | rs12072739  | G  | 0.22 | 0.017    | 0.002 | 2.01E-13  | 0.014     | 0.009 | 1.10E-01 |
| BMI       | rs12121950  | T  | 0.36 | 0.019    | 0.002 | 8.88E-25  | 0.011     | 0.008 | 1.80E-01 |
| BMI       | rs12140153  | G  | 0.93 | 0.035    | 0.003 | 2.98E-25  | 0.006     | 0.013 | 6.10E-01 |
| BMI       | rs17024393  | C  | 0.03 | 0.064    | 0.005 | 1.87E-39  | 0.044     | 0.025 | 5.20E-02 |
| BMI       | rs1730859   | G  | 0.32 | 0.012    | 0.002 | 1.68E-12  | 0.012     | 0.008 | 2.00E-01 |
| BMI       | rs1884429   | T  | 0.23 | 0.013    | 0.002 | 1.76E-12  | -0.004    | 0.009 | 5.80E-01 |
| BMI       | rs2400414   | C  | 0.64 | 0.013    | 0.002 | 2.56E-12  | -0.009    | 0.008 | 1.40E-01 |
| BMI       | rs2820295   | A  | 0.30 | 0.024    | 0.002 | 5.91E-39  | 0.009     | 0.008 | 2.80E-01 |
| BMI       | rs2968487   | T  | 0.28 | 0.018    | 0.002 | 1.40E-22  | 0.013     | 0.009 | 1.80E-01 |
| BMI       | rs3101336   | C  | 0.64 | 0.025    | 0.002 | 9.44E-57  | -0.005    | 0.008 | 4.80E-01 |
| BMI       | rs543874    | G  | 0.19 | 0.048    | 0.002 | 9.24E-127 | 0.002     | 0.010 | 7.90E-01 |
| BMI       | rs561136    | C  | 0.16 | 0.019    | 0.002 | 9.19E-15  | -0.009    | 0.011 | 5.00E-01 |
| BMI       | rs61813324  | T  | 0.13 | 0.029    | 0.003 | 5.64E-25  | 0.007     | 0.012 | 6.30E-01 |
| BMI       | rs61828641  | A  | 0.11 | 0.022    | 0.003 | 1.06E-13  | -0.001    | 0.012 | 8.50E-01 |
| BMI       | rs6661316   | T  | 0.57 | 0.012    | 0.002 | 6.38E-14  | 0.001     | 0.008 | 9.20E-01 |
| BMI       | rs6690398   | A  | 0.57 | 0.013    | 0.002 | 1.94E-13  | 0.010     | 0.008 | 2.70E-01 |
| BMI       | rs7534091   | G  | 0.26 | 0.012    | 0.002 | 2.62E-11  | -0.014    | 0.009 | 1.10E-01 |
| BMI       | rs79113395  | G  | 0.74 | 0.020    | 0.002 | 9.82E-20  | 0.009     | 0.009 | 2.30E-01 |
| BMI       | rs946824    | T  | 0.14 | 0.020    | 0.003 | 3.27E-15  | 0.000     | 0.011 | 8.60E-01 |
| BMI       | rs10203386  | A  | 0.43 | 0.032    | 0.002 | 4.43E-78  | 0.010     | 0.008 | 2.30E-01 |
| BMI       | rs10497870  | A  | 0.59 | 0.012    | 0.002 | 3.95E-14  | -0.017    | 0.008 | 2.70E-02 |
| BMI       | rs10929925  | C  | 0.52 | 0.014    | 0.002 | 6.99E-19  | -0.013    | 0.008 | 9.90E-02 |
| BMI       | rs11692326  | T  | 0.22 | 0.015    | 0.002 | 1.02E-14  | -0.002    | 0.009 | 8.40E-01 |
| BMI       | rs12692596  | T  | 0.36 | 0.012    | 0.002 | 1.68E-12  | 0.004     | 0.008 | 5.40E-01 |
| BMI       | rs12714199  | C  | 0.40 | 0.014    | 0.002 | 1.09E-16  | 0.005     | 0.008 | 4.60E-01 |
| BMI       | rs13002946  | T  | 0.72 | 0.018    | 0.002 | 1.21E-20  | 0.023     | 0.009 | 7.80E-03 |
| BMI       | rs13021737  | G  | 0.83 | 0.058    | 0.002 | 9.11E-167 | -0.004    | 0.010 | 7.00E-01 |
| BMI       | rs13033310  | A  | 0.25 | 0.015    | 0.002 | 3.22E-11  | 0.007     | 0.009 | 5.30E-01 |
| BMI       | rs1451077   | G  | 0.43 | 0.017    | 0.002 | 5.86E-19  | 0.007     | 0.008 | 5.80E-01 |
| BMI       | rs1470545   | T  | 0.04 | 0.037    | 0.004 | 7.65E-18  | 0.044     | 0.020 | 2.10E-02 |
| BMI       | rs1561554   | G  | 0.39 | 0.012    | 0.002 | 1.34E-11  | 0.000     | 0.008 | 9.40E-01 |
| BMI       | rs264962    | C  | 0.60 | 0.012    | 0.002 | 2.56E-12  | -0.002    | 0.008 | 8.00E-01 |
| BMI       | rs2861685   | T  | 0.60 | 0.017    | 0.002 | 3.81E-18  | -0.002    | 0.008 | 8.30E-01 |
| BMI       | rs3770799   | G  | 0.39 | 0.011    | 0.002 | 2.40E-10  | 0.014     | 0.008 | 8.50E-02 |
| BMI       | rs4671328   | T  | 0.43 | 0.021    | 0.002 | 2.45E-36  | 0.017     | 0.008 | 3.10E-02 |
| BMI       | rs4973618   | G  | 0.34 | 0.015    | 0.002 | 2.00E-16  | 0.018     | 0.008 | 2.20E-02 |
| BMI       | rs6545714   | G  | 0.38 | 0.019    | 0.002 | 7.79E-34  | -0.009    | 0.008 | 3.30E-01 |
| BMI       | rs6720868   | T  | 0.34 | 0.015    | 0.002 | 1.17E-17  | 0.008     | 0.008 | 3.20E-01 |
| BMI       | rs7561278   | T  | 0.77 | 0.017    | 0.002 | 8.44E-16  | 0.018     | 0.009 | 3.10E-02 |
| BMI       | rs7570446   | A  | 0.52 | 0.011    | 0.002 | 5.15E-09  | 0.006     | 0.008 | 3.60E-01 |

|     |            |   |      |       |       |          |        |       |          |
|-----|------------|---|------|-------|-------|----------|--------|-------|----------|
| BMI | rs7575118  | T | 0.13 | 0.014 | 0.002 | 5.43E-09 | 0.003  | 0.011 | 9.00E-01 |
| BMI | rs7588437  | G | 0.61 | 0.017 | 0.002 | 2.85E-22 | 0.020  | 0.008 | 7.70E-03 |
| BMI | rs7599312  | G | 0.73 | 0.018 | 0.002 | 4.93E-24 | -0.003 | 0.009 | 6.10E-01 |
| BMI | rs7607490  | A | 0.11 | 0.016 | 0.003 | 1.25E-09 | -0.017 | 0.012 | 1.30E-01 |
| BMI | rs930295   | A | 0.17 | 0.021 | 0.002 | 1.52E-19 | 0.004  | 0.010 | 5.60E-01 |
| BMI | rs9808302  | G | 0.48 | 0.012 | 0.002 | 1.03E-09 | 0.006  | 0.008 | 2.80E-01 |
| BMI | rs10510419 | G | 0.85 | 0.017 | 0.002 | 2.79E-13 | -0.004 | 0.011 | 9.40E-01 |
| BMI | rs11915371 | C | 0.19 | 0.015 | 0.002 | 2.24E-13 | 0.031  | 0.010 | 1.50E-03 |
| BMI | rs12635553 | A | 0.53 | 0.010 | 0.002 | 5.76E-09 | -0.003 | 0.008 | 7.60E-01 |
| BMI | rs1436344  | C | 0.59 | 0.015 | 0.002 | 5.28E-18 | 0.013  | 0.008 | 1.20E-01 |
| BMI | rs16851483 | T | 0.06 | 0.035 | 0.003 | 4.06E-25 | 0.048  | 0.016 | 2.10E-03 |
| BMI | rs17681451 | G | 0.93 | 0.023 | 0.003 | 3.93E-13 | 0.008  | 0.014 | 5.00E-01 |
| BMI | rs1916801  | A | 0.62 | 0.017 | 0.002 | 2.76E-23 | 0.005  | 0.008 | 5.00E-01 |
| BMI | rs28350    | A | 0.19 | 0.017 | 0.002 | 5.36E-15 | 0.003  | 0.010 | 7.00E-01 |
| BMI | rs355777   | C | 0.42 | 0.015 | 0.002 | 6.55E-19 | 0.010  | 0.008 | 2.50E-01 |
| BMI | rs39654    | G | 0.54 | 0.016 | 0.002 | 8.96E-22 | 0.006  | 0.008 | 4.90E-01 |
| BMI | rs4857968  | G | 0.76 | 0.013 | 0.002 | 3.80E-12 | 0.016  | 0.009 | 5.60E-02 |
| BMI | rs59302296 | A | 0.09 | 0.022 | 0.003 | 1.19E-11 | 0.002  | 0.013 | 9.40E-01 |
| BMI | rs6443750  | C | 0.82 | 0.015 | 0.002 | 4.55E-13 | 0.011  | 0.010 | 2.70E-01 |
| BMI | rs6804181  | A | 0.82 | 0.014 | 0.002 | 8.76E-10 | 0.002  | 0.010 | 6.90E-01 |
| BMI | rs6804842  | G | 0.56 | 0.014 | 0.002 | 1.22E-18 | -0.017 | 0.008 | 4.20E-02 |
| BMI | rs7616009  | G | 0.85 | 0.016 | 0.002 | 6.08E-11 | 0.018  | 0.011 | 9.70E-02 |
| BMI | rs7631156  | A | 0.30 | 0.022 | 0.002 | 6.94E-33 | 0.012  | 0.008 | 1.60E-01 |
| BMI | rs9816226  | T | 0.81 | 0.032 | 0.002 | 7.34E-51 | -0.021 | 0.010 | 1.90E-02 |
| BMI | rs9818122  | C | 0.22 | 0.023 | 0.002 | 4.18E-30 | -0.004 | 0.010 | 6.40E-01 |
| BMI | rs9826775  | A | 0.87 | 0.016 | 0.002 | 1.06E-10 | -0.003 | 0.011 | 7.80E-01 |
| BMI | rs9862795  | T | 0.51 | 0.026 | 0.002 | 6.82E-44 | 0.020  | 0.008 | 8.10E-03 |
| BMI | rs10938397 | G | 0.42 | 0.032 | 0.002 | 4.46E-90 | 0.016  | 0.008 | 5.40E-02 |
| BMI | rs12509234 | C | 0.28 | 0.012 | 0.002 | 1.03E-09 | -0.004 | 0.008 | 6.40E-01 |
| BMI | rs13107325 | T | 0.08 | 0.047 | 0.003 | 1.95E-48 | 0.011  | 0.015 | 4.00E-01 |
| BMI | rs13110266 | G | 0.59 | 0.012 | 0.002 | 9.19E-15 | 0.013  | 0.008 | 1.40E-01 |
| BMI | rs1346841  | G | 0.58 | 0.013 | 0.002 | 1.25E-13 | -0.004 | 0.008 | 6.40E-01 |
| BMI | rs1437842  | G | 0.52 | 0.011 | 0.002 | 4.51E-10 | -0.004 | 0.008 | 6.10E-01 |
| BMI | rs1451109  | G | 0.32 | 0.016 | 0.002 | 1.48E-20 | 0.015  | 0.008 | 7.90E-02 |
| BMI | rs1481012  | A | 0.91 | 0.019 | 0.003 | 4.80E-13 | 0.006  | 0.012 | 7.20E-01 |
| BMI | rs1522569  | T | 0.83 | 0.014 | 0.002 | 1.46E-10 | -0.004 | 0.010 | 6.70E-01 |
| BMI | rs17001561 | A | 0.18 | 0.015 | 0.002 | 2.89E-10 | -0.004 | 0.011 | 7.50E-01 |
| BMI | rs17276464 | T | 0.43 | 0.010 | 0.002 | 1.97E-09 | -0.003 | 0.008 | 8.10E-01 |
| BMI | rs2051559  | C | 0.12 | 0.017 | 0.003 | 2.39E-11 | -0.002 | 0.012 | 9.70E-01 |
| BMI | rs2192158  | A | 0.47 | 0.014 | 0.002 | 7.70E-16 | 0.006  | 0.008 | 4.00E-01 |
| BMI | rs2391540  | T | 0.33 | 0.014 | 0.002 | 1.14E-14 | 0.006  | 0.008 | 4.30E-01 |
| BMI | rs34811474 | G | 0.78 | 0.029 | 0.002 | 3.58E-37 | 0.011  | 0.009 | 2.70E-01 |
| BMI | rs35851183 | G | 0.37 | 0.012 | 0.002 | 1.45E-09 | 0.008  | 0.008 | 3.90E-01 |
| BMI | rs4834272  | C | 0.31 | 0.011 | 0.002 | 2.11E-10 | 0.000  | 0.008 | 9.30E-01 |
| BMI | rs57800857 | A | 0.66 | 0.016 | 0.002 | 4.16E-15 | 0.013  | 0.008 | 9.50E-02 |
| BMI | rs6850421  | A | 0.49 | 0.011 | 0.002 | 2.72E-09 | 0.010  | 0.008 | 1.70E-01 |
| BMI | rs7678054  | G | 0.55 | 0.010 | 0.002 | 5.76E-09 | -0.001 | 0.008 | 9.90E-01 |
| BMI | rs10044136 | G | 0.44 | 0.016 | 0.002 | 1.58E-21 | 0.011  | 0.008 | 2.20E-01 |
| BMI | rs10942267 | A | 0.72 | 0.015 | 0.002 | 2.00E-16 | 0.000  | 0.008 | 9.80E-01 |
| BMI | rs11739877 | T | 0.61 | 0.012 | 0.002 | 1.16E-10 | 0.008  | 0.008 | 3.90E-01 |
| BMI | rs13174863 | G | 0.17 | 0.020 | 0.002 | 1.08E-17 | -0.004 | 0.011 | 6.90E-01 |
| BMI | rs1501673  | A | 0.14 | 0.029 | 0.003 | 6.57E-31 | 0.009  | 0.012 | 4.80E-01 |
| BMI | rs2053682  | A | 0.68 | 0.017 | 0.002 | 3.57E-21 | 0.012  | 0.008 | 1.70E-01 |
| BMI | rs2112347  | T | 0.63 | 0.028 | 0.002 | 2.84E-59 | 0.016  | 0.008 | 3.60E-02 |
| BMI | rs2861089  | A | 0.38 | 0.011 | 0.002 | 6.56E-10 | 0.001  | 0.008 | 9.10E-01 |
| BMI | rs288230   | T | 0.83 | 0.024 | 0.002 | 4.28E-25 | 0.008  | 0.010 | 3.80E-01 |

|     |            |   |      |       |       |          |        |       |          |
|-----|------------|---|------|-------|-------|----------|--------|-------|----------|
| BMI | rs459552   | T | 0.23 | 0.013 | 0.002 | 2.56E-12 | 0.014  | 0.009 | 1.10E-01 |
| BMI | rs4700608  | C | 0.52 | 0.016 | 0.002 | 7.68E-20 | -0.011 | 0.008 | 1.90E-01 |
| BMI | rs6451675  | G | 0.66 | 0.014 | 0.002 | 7.38E-15 | 0.002  | 0.008 | 8.30E-01 |
| BMI | rs6556301  | G | 0.67 | 0.011 | 0.002 | 2.99E-11 | 0.010  | 0.008 | 2.30E-01 |
| BMI | rs6864049  | G | 0.53 | 0.012 | 0.002 | 3.95E-14 | 0.001  | 0.008 | 8.30E-01 |
| BMI | rs6890310  | G | 0.73 | 0.012 | 0.002 | 3.77E-10 | 0.012  | 0.009 | 2.80E-01 |
| BMI | rs698147   | A | 0.50 | 0.012 | 0.002 | 8.88E-12 | 0.000  | 0.008 | 8.90E-01 |
| BMI | rs7713317  | G | 0.28 | 0.017 | 0.002 | 2.91E-20 | 0.005  | 0.009 | 5.00E-01 |
| BMI | rs7734385  | G | 0.55 | 0.010 | 0.002 | 2.75E-10 | 0.000  | 0.008 | 9.60E-01 |
| BMI | rs11757278 | T | 0.68 | 0.013 | 0.002 | 2.56E-12 | 0.019  | 0.008 | 3.30E-02 |
| BMI | rs12206094 | C | 0.68 | 0.014 | 0.002 | 1.95E-15 | -0.014 | 0.009 | 1.10E-01 |
| BMI | rs1269175  | A | 0.51 | 0.011 | 0.002 | 6.56E-10 | -0.002 | 0.008 | 7.90E-01 |
| BMI | rs13191362 | A | 0.87 | 0.024 | 0.003 | 5.46E-21 | 0.008  | 0.012 | 4.80E-01 |
| BMI | rs2206277  | T | 0.18 | 0.041 | 0.002 | 4.43E-84 | -0.008 | 0.010 | 4.00E-01 |
| BMI | rs2228213  | G | 0.67 | 0.014 | 0.002 | 2.44E-17 | 0.011  | 0.008 | 1.10E-01 |
| BMI | rs2246012  | C | 0.17 | 0.016 | 0.002 | 2.51E-13 | 0.004  | 0.010 | 8.10E-01 |
| BMI | rs2357760  | A | 0.67 | 0.014 | 0.002 | 4.04E-17 | 0.017  | 0.008 | 2.80E-02 |
| BMI | rs2622274  | G | 0.58 | 0.011 | 0.002 | 3.09E-10 | 0.017  | 0.008 | 6.10E-02 |
| BMI | rs3806114  | G | 0.29 | 0.012 | 0.002 | 2.62E-11 | 0.012  | 0.008 | 1.10E-01 |
| BMI | rs487152   | A | 0.48 | 0.011 | 0.002 | 1.48E-11 | -0.004 | 0.008 | 6.90E-01 |
| BMI | rs6922607  | G | 0.22 | 0.013 | 0.002 | 3.44E-09 | -0.021 | 0.010 | 2.40E-02 |
| BMI | rs6932930  | G | 0.20 | 0.026 | 0.002 | 1.09E-41 | -0.010 | 0.009 | 3.90E-01 |
| BMI | rs765875   | C | 0.50 | 0.013 | 0.002 | 8.18E-15 | 0.003  | 0.008 | 5.30E-01 |
| BMI | rs7769594  | T | 0.15 | 0.016 | 0.002 | 1.00E-12 | 0.003  | 0.011 | 7.90E-01 |
| BMI | rs816367   | G | 0.35 | 0.011 | 0.002 | 3.09E-10 | 0.001  | 0.008 | 8.70E-01 |
| BMI | rs9320823  | C | 0.59 | 0.017 | 0.002 | 2.85E-22 | 0.022  | 0.008 | 3.80E-03 |
| BMI | rs1030015  | T | 0.53 | 0.011 | 0.002 | 1.44E-10 | -0.004 | 0.008 | 6.10E-01 |
| BMI | rs1048303  | C | 0.44 | 0.011 | 0.002 | 9.76E-11 | 0.017  | 0.008 | 3.50E-02 |
| BMI | rs10499694 | A | 0.52 | 0.013 | 0.002 | 4.47E-16 | -0.008 | 0.008 | 3.10E-01 |
| BMI | rs11525873 | T | 0.90 | 0.023 | 0.003 | 4.17E-13 | 0.007  | 0.013 | 6.60E-01 |
| BMI | rs1167821  | T | 0.42 | 0.020 | 0.002 | 3.73E-26 | 0.019  | 0.008 | 6.50E-03 |
| BMI | rs1852006  | G | 0.65 | 0.015 | 0.002 | 1.90E-17 | 0.013  | 0.008 | 9.20E-02 |
| BMI | rs1899689  | T | 0.38 | 0.012 | 0.002 | 1.68E-12 | 0.000  | 0.008 | 8.90E-01 |
| BMI | rs215614   | G | 0.34 | 0.014 | 0.002 | 1.24E-15 | 0.019  | 0.008 | 3.30E-02 |
| BMI | rs2396625  | T | 0.60 | 0.018 | 0.002 | 4.06E-25 | 0.003  | 0.008 | 6.50E-01 |
| BMI | rs2907948  | G | 0.75 | 0.015 | 0.002 | 2.32E-14 | 0.007  | 0.009 | 5.00E-01 |
| BMI | rs4307239  | G | 0.48 | 0.012 | 0.002 | 1.34E-11 | 0.002  | 0.008 | 8.40E-01 |
| BMI | rs4721089  | T | 0.76 | 0.017 | 0.002 | 3.85E-13 | -0.004 | 0.009 | 7.90E-01 |
| BMI | rs6463489  | T | 0.07 | 0.017 | 0.003 | 1.34E-10 | 0.016  | 0.012 | 1.90E-01 |
| BMI | rs6962280  | G | 0.51 | 0.014 | 0.002 | 1.73E-13 | 0.011  | 0.008 | 2.50E-01 |
| BMI | rs740157   | A | 0.43 | 0.012 | 0.002 | 1.64E-13 | 0.011  | 0.008 | 1.10E-01 |
| BMI | rs7777084  | A | 0.45 | 0.013 | 0.002 | 1.30E-14 | -0.001 | 0.008 | 8.50E-01 |
| BMI | rs7802342  | G | 0.27 | 0.012 | 0.002 | 6.74E-11 | 0.004  | 0.009 | 6.00E-01 |
| BMI | rs10099330 | G | 0.44 | 0.012 | 0.002 | 2.56E-12 | 0.007  | 0.008 | 2.90E-01 |
| BMI | rs10954772 | T | 0.30 | 0.016 | 0.002 | 1.57E-13 | 0.004  | 0.008 | 5.60E-01 |
| BMI | rs1106761  | A | 0.35 | 0.013 | 0.002 | 2.08E-11 | -0.002 | 0.008 | 7.80E-01 |
| BMI | rs12680842 | A | 0.62 | 0.014 | 0.002 | 6.66E-17 | 0.012  | 0.008 | 1.30E-01 |
| BMI | rs12681792 | A | 0.19 | 0.015 | 0.002 | 9.14E-13 | 0.007  | 0.010 | 5.70E-01 |
| BMI | rs1383592  | A | 0.23 | 0.012 | 0.002 | 6.27E-09 | 0.022  | 0.010 | 4.00E-02 |
| BMI | rs1431659  | A | 0.28 | 0.019 | 0.002 | 8.94E-24 | 0.001  | 0.009 | 7.80E-01 |
| BMI | rs1658820  | T | 0.25 | 0.013 | 0.002 | 4.11E-11 | 0.003  | 0.009 | 7.90E-01 |
| BMI | rs17405819 | T | 0.70 | 0.021 | 0.002 | 9.81E-32 | 0.023  | 0.008 | 7.20E-03 |
| BMI | rs1982441  | T | 0.14 | 0.017 | 0.003 | 1.05E-11 | 0.018  | 0.011 | 9.50E-02 |
| BMI | rs2196618  | G | 0.75 | 0.014 | 0.002 | 5.57E-13 | 0.007  | 0.009 | 3.10E-01 |
| BMI | rs354508   | C | 0.84 | 0.015 | 0.002 | 2.18E-10 | 0.005  | 0.011 | 5.90E-01 |
| BMI | rs36061954 | T | 0.38 | 0.012 | 0.002 | 3.77E-10 | 0.003  | 0.008 | 8.60E-01 |

|     |            |   |      |       |       |          |        |       |          |
|-----|------------|---|------|-------|-------|----------|--------|-------|----------|
| BMI | rs3808477  | C | 0.76 | 0.018 | 0.002 | 9.80E-22 | 0.002  | 0.009 | 6.70E-01 |
| BMI | rs4123853  | T | 0.37 | 0.014 | 0.002 | 1.79E-16 | 0.009  | 0.008 | 2.50E-01 |
| BMI | rs4841504  | C | 0.50 | 0.017 | 0.002 | 3.22E-25 | 0.004  | 0.008 | 4.90E-01 |
| BMI | rs72673947 | G | 0.12 | 0.022 | 0.003 | 6.31E-13 | 0.021  | 0.013 | 1.20E-01 |
| BMI | rs7826312  | C | 0.59 | 0.011 | 0.002 | 9.59E-12 | 0.001  | 0.008 | 5.90E-01 |
| BMI | rs10116186 | G | 0.52 | 0.012 | 0.002 | 1.03E-09 | -0.007 | 0.008 | 4.20E-01 |
| BMI | rs10761247 | G | 0.43 | 0.011 | 0.002 | 2.99E-11 | 0.000  | 0.008 | 8.90E-01 |
| BMI | rs10858334 | G | 0.13 | 0.015 | 0.003 | 3.22E-09 | -0.021 | 0.011 | 8.70E-02 |
| BMI | rs10984756 | G | 0.09 | 0.018 | 0.003 | 3.26E-10 | 0.011  | 0.013 | 3.10E-01 |
| BMI | rs1928295  | T | 0.56 | 0.013 | 0.002 | 5.52E-17 | -0.012 | 0.008 | 1.30E-01 |
| BMI | rs2134858  | C | 0.46 | 0.012 | 0.002 | 5.89E-12 | 0.007  | 0.008 | 4.30E-01 |
| BMI | rs2183824  | T | 0.31 | 0.023 | 0.002 | 4.16E-43 | 0.007  | 0.008 | 4.90E-01 |
| BMI | rs2777768  | A | 0.74 | 0.012 | 0.002 | 3.77E-10 | 0.002  | 0.009 | 6.40E-01 |
| BMI | rs3739514  | A | 0.35 | 0.013 | 0.002 | 4.11E-11 | 0.014  | 0.008 | 5.10E-02 |
| BMI | rs3811125  | C | 0.73 | 0.015 | 0.002 | 4.55E-13 | 0.004  | 0.009 | 5.00E-01 |
| BMI | rs4740619  | T | 0.52 | 0.019 | 0.002 | 3.36E-32 | 0.012  | 0.008 | 1.20E-01 |
| BMI | rs6476617  | G | 0.64 | 0.015 | 0.002 | 1.87E-18 | 0.036  | 0.008 | 6.50E-06 |
| BMI | rs6477694  | C | 0.33 | 0.013 | 0.002 | 1.25E-13 | 0.009  | 0.008 | 3.60E-01 |
| BMI | rs7024334  | T | 0.23 | 0.014 | 0.002 | 1.48E-11 | 0.002  | 0.009 | 7.50E-01 |
| BMI | rs7037266  | C | 0.65 | 0.011 | 0.002 | 3.89E-09 | -0.002 | 0.008 | 9.60E-01 |
| BMI | rs7357754  | G | 0.52 | 0.012 | 0.002 | 1.68E-12 | 0.007  | 0.008 | 2.60E-01 |
| BMI | rs867560   | G | 0.46 | 0.014 | 0.002 | 1.24E-15 | -0.005 | 0.008 | 5.40E-01 |
| BMI | rs10761785 | G | 0.49 | 0.013 | 0.002 | 9.37E-17 | -0.009 | 0.008 | 3.30E-01 |
| BMI | rs10823893 | A | 0.39 | 0.012 | 0.002 | 6.74E-11 | -0.001 | 0.008 | 9.10E-01 |
| BMI | rs10887584 | A | 0.45 | 0.013 | 0.002 | 3.32E-11 | 0.004  | 0.008 | 6.30E-01 |
| BMI | rs12098284 | T | 0.12 | 0.018 | 0.003 | 1.47E-12 | 0.013  | 0.012 | 2.20E-01 |
| BMI | rs12765914 | T | 0.08 | 0.023 | 0.003 | 3.09E-13 | 0.014  | 0.014 | 4.10E-01 |
| BMI | rs1277733  | T | 0.78 | 0.012 | 0.002 | 1.97E-09 | 0.008  | 0.009 | 5.30E-01 |
| BMI | rs17636031 | C | 0.27 | 0.015 | 0.002 | 1.17E-17 | -0.001 | 0.009 | 8.10E-01 |
| BMI | rs2439823  | G | 0.55 | 0.017 | 0.002 | 2.85E-22 | 0.012  | 0.008 | 6.90E-02 |
| BMI | rs34277166 | A | 0.45 | 0.014 | 0.002 | 3.48E-14 | 0.009  | 0.008 | 3.30E-01 |
| BMI | rs4097319  | T | 0.58 | 0.011 | 0.002 | 3.09E-10 | 0.001  | 0.008 | 9.50E-01 |
| BMI | rs4290163  | T | 0.41 | 0.013 | 0.002 | 2.06E-14 | -0.011 | 0.008 | 2.40E-01 |
| BMI | rs4880341  | C | 0.47 | 0.013 | 0.002 | 2.06E-14 | 0.003  | 0.008 | 8.10E-01 |
| BMI | rs7070670  | C | 0.68 | 0.013 | 0.002 | 1.97E-09 | 0.008  | 0.008 | 3.10E-01 |
| BMI | rs7084454  | A | 0.34 | 0.020 | 0.002 | 3.82E-28 | 0.013  | 0.008 | 1.70E-01 |
| BMI | rs7893571  | T | 0.67 | 0.013 | 0.002 | 3.80E-12 | 0.001  | 0.008 | 7.90E-01 |
| BMI | rs7899106  | G | 0.04 | 0.033 | 0.004 | 9.76E-19 | 0.040  | 0.018 | 3.70E-02 |
| BMI | rs7903146  | C | 0.68 | 0.018 | 0.002 | 4.65E-23 | -0.010 | 0.009 | 2.10E-01 |
| BMI | rs845084   | A | 0.25 | 0.014 | 0.002 | 8.19E-13 | 0.004  | 0.009 | 7.20E-01 |
| BMI | rs11218510 | G | 0.63 | 0.014 | 0.002 | 2.56E-12 | 0.004  | 0.008 | 4.80E-01 |
| BMI | rs12282785 | C | 0.75 | 0.016 | 0.002 | 8.73E-12 | 0.006  | 0.010 | 3.70E-01 |
| BMI | rs12286929 | G | 0.48 | 0.018 | 0.002 | 1.91E-28 | 0.005  | 0.008 | 4.80E-01 |
| BMI | rs12364470 | G | 0.16 | 0.019 | 0.002 | 1.90E-17 | 0.019  | 0.010 | 6.90E-02 |
| BMI | rs1982350  | G | 0.65 | 0.016 | 0.002 | 4.45E-18 | 0.006  | 0.008 | 5.00E-01 |
| BMI | rs2065418  | T | 0.65 | 0.014 | 0.002 | 1.14E-14 | 0.008  | 0.008 | 3.10E-01 |
| BMI | rs2605603  | G | 0.50 | 0.010 | 0.002 | 1.21E-10 | 0.001  | 0.008 | 8.10E-01 |
| BMI | rs2862996  | G | 0.34 | 0.022 | 0.002 | 5.48E-37 | 0.019  | 0.008 | 1.20E-02 |
| BMI | rs349088   | C | 0.48 | 0.013 | 0.002 | 2.06E-14 | 0.002  | 0.008 | 4.90E-01 |
| BMI | rs3825061  | T | 0.35 | 0.014 | 0.002 | 1.79E-16 | 0.007  | 0.008 | 3.00E-01 |
| BMI | rs4256980  | G | 0.63 | 0.019 | 0.002 | 3.82E-28 | 0.022  | 0.008 | 4.60E-03 |
| BMI | rs5215     | T | 0.65 | 0.011 | 0.002 | 2.99E-11 | 0.000  | 0.008 | 9.50E-01 |
| BMI | rs592483   | C | 0.42 | 0.014 | 0.002 | 7.70E-16 | 0.004  | 0.008 | 6.10E-01 |
| BMI | rs6265     | C | 0.80 | 0.041 | 0.002 | 4.16E-86 | 0.034  | 0.010 | 1.40E-03 |
| BMI | rs6591407  | C | 0.81 | 0.012 | 0.002 | 3.53E-09 | 0.012  | 0.010 | 2.70E-01 |
| BMI | rs7124681  | A | 0.42 | 0.026 | 0.002 | 4.67E-58 | 0.000  | 0.008 | 9.70E-01 |

|     |            |   |      |       |       |          |        |       |          |
|-----|------------|---|------|-------|-------|----------|--------|-------|----------|
| BMI | rs76942203 | A | 0.06 | 0.026 | 0.004 | 1.41E-10 | 0.004  | 0.017 | 7.50E-01 |
| BMI | rs7944782  | G | 0.51 | 0.014 | 0.002 | 2.44E-17 | 0.024  | 0.008 | 3.30E-03 |
| BMI | rs10744146 | G | 0.44 | 0.011 | 0.002 | 2.99E-11 | 0.003  | 0.008 | 7.30E-01 |
| BMI | rs11047132 | G | 0.09 | 0.023 | 0.003 | 2.43E-13 | 0.018  | 0.014 | 2.20E-01 |
| BMI | rs11105839 | T | 0.65 | 0.011 | 0.002 | 2.99E-11 | 0.000  | 0.008 | 7.20E-01 |
| BMI | rs11115176 | T | 0.78 | 0.013 | 0.002 | 5.40E-12 | 0.011  | 0.009 | 2.30E-01 |
| BMI | rs11170468 | A | 0.77 | 0.013 | 0.002 | 7.80E-12 | 0.002  | 0.009 | 7.60E-01 |
| BMI | rs11611246 | T | 0.18 | 0.022 | 0.002 | 7.16E-29 | 0.011  | 0.009 | 1.80E-01 |
| BMI | rs11836108 | A | 0.28 | 0.011 | 0.002 | 3.43E-10 | 0.001  | 0.008 | 9.80E-01 |
| BMI | rs12321904 | T | 0.53 | 0.010 | 0.002 | 1.97E-09 | 0.008  | 0.008 | 4.40E-01 |
| BMI | rs12369179 | C | 0.93 | 0.034 | 0.003 | 5.46E-28 | 0.003  | 0.013 | 7.40E-01 |
| BMI | rs12422552 | G | 0.71 | 0.013 | 0.002 | 5.40E-12 | 0.005  | 0.009 | 4.60E-01 |
| BMI | rs650198   | C | 0.31 | 0.014 | 0.002 | 5.57E-13 | -0.001 | 0.009 | 5.80E-01 |
| BMI | rs6539064  | C | 0.72 | 0.019 | 0.002 | 1.78E-24 | 0.007  | 0.009 | 4.10E-01 |
| BMI | rs704061   | C | 0.44 | 0.014 | 0.002 | 6.66E-17 | -0.004 | 0.008 | 7.60E-01 |
| BMI | rs7138803  | A | 0.34 | 0.030 | 0.002 | 2.40E-68 | 0.001  | 0.008 | 8.30E-01 |
| BMI | rs7975187  | G | 0.22 | 0.014 | 0.002 | 6.85E-11 | 0.019  | 0.009 | 2.40E-02 |
| BMI | rs1045411  | C | 0.73 | 0.014 | 0.002 | 2.56E-13 | 0.023  | 0.009 | 5.50E-03 |
| BMI | rs12429545 | A | 0.11 | 0.031 | 0.002 | 7.09E-39 | 0.002  | 0.012 | 8.20E-01 |
| BMI | rs12868881 | A | 0.43 | 0.014 | 0.002 | 4.75E-16 | 0.010  | 0.008 | 1.80E-01 |
| BMI | rs1536053  | C | 0.69 | 0.012 | 0.002 | 1.35E-10 | -0.001 | 0.008 | 9.20E-01 |
| BMI | rs1927790  | C | 0.45 | 0.014 | 0.002 | 2.13E-18 | 0.023  | 0.008 | 2.90E-03 |
| BMI | rs41284828 | G | 0.96 | 0.034 | 0.006 | 2.20E-09 | -0.028 | 0.023 | 1.60E-01 |
| BMI | rs4421883  | C | 0.55 | 0.010 | 0.002 | 1.37E-09 | 0.002  | 0.008 | 8.20E-01 |
| BMI | rs77432547 | G | 0.28 | 0.017 | 0.002 | 5.72E-16 | 0.005  | 0.009 | 5.90E-01 |
| BMI | rs8181823  | C | 0.78 | 0.013 | 0.002 | 4.10E-10 | 0.005  | 0.009 | 7.00E-01 |
| BMI | rs9540493  | A | 0.47 | 0.013 | 0.002 | 3.24E-14 | -0.013 | 0.008 | 8.60E-02 |
| BMI | rs9595908  | T | 0.59 | 0.015 | 0.002 | 1.32E-19 | 0.009  | 0.008 | 3.00E-01 |
| BMI | rs9603697  | T | 0.35 | 0.013 | 0.002 | 9.74E-14 | -0.001 | 0.008 | 7.30E-01 |
| BMI | rs10132280 | C | 0.68 | 0.021 | 0.002 | 1.35E-32 | -0.002 | 0.008 | 6.30E-01 |
| BMI | rs1491905  | T | 0.48 | 0.015 | 0.002 | 5.28E-18 | 0.013  | 0.008 | 1.30E-01 |
| BMI | rs1951455  | C | 0.74 | 0.015 | 0.002 | 6.73E-15 | -0.019 | 0.009 | 2.50E-02 |
| BMI | rs1954494  | T | 0.54 | 0.010 | 0.002 | 1.34E-09 | -0.001 | 0.008 | 8.60E-01 |
| BMI | rs217669   | C | 0.25 | 0.017 | 0.002 | 2.60E-16 | 0.023  | 0.009 | 8.60E-03 |
| BMI | rs4906263  | G | 0.33 | 0.018 | 0.002 | 1.40E-22 | 0.015  | 0.008 | 4.10E-02 |
| BMI | rs709400   | A | 0.61 | 0.015 | 0.002 | 3.15E-18 | 0.013  | 0.008 | 7.80E-02 |
| BMI | rs7144011  | T | 0.21 | 0.026 | 0.002 | 1.70E-39 | 0.000  | 0.009 | 9.80E-01 |
| BMI | rs872281   | C | 0.83 | 0.015 | 0.002 | 3.88E-11 | 0.005  | 0.010 | 4.60E-01 |
| BMI | rs942066   | G | 0.62 | 0.020 | 0.002 | 5.52E-24 | 0.022  | 0.008 | 1.00E-02 |
| BMI | rs11633626 | C | 0.38 | 0.016 | 0.002 | 2.73E-18 | 0.008  | 0.008 | 3.20E-01 |
| BMI | rs11636611 | T | 0.51 | 0.010 | 0.002 | 9.50E-10 | 0.013  | 0.008 | 1.10E-01 |
| BMI | rs11856579 | G | 0.78 | 0.016 | 0.002 | 2.38E-17 | 0.012  | 0.009 | 1.80E-01 |
| BMI | rs12438629 | C | 0.97 | 0.035 | 0.005 | 2.50E-11 | 0.003  | 0.027 | 8.90E-01 |
| BMI | rs1471212  | A | 0.47 | 0.011 | 0.002 | 1.44E-10 | 0.010  | 0.008 | 1.80E-01 |
| BMI | rs1996120  | G | 0.59 | 0.017 | 0.002 | 1.67E-25 | 0.000  | 0.008 | 1.00E+00 |
| BMI | rs2715423  | G | 0.77 | 0.012 | 0.002 | 1.42E-09 | -0.011 | 0.009 | 2.00E-01 |
| BMI | rs6493498  | T | 0.46 | 0.014 | 0.002 | 1.10E-17 | 0.005  | 0.008 | 6.10E-01 |
| BMI | rs7181610  | A | 0.89 | 0.015 | 0.003 | 5.22E-09 | 0.025  | 0.011 | 1.40E-02 |
| BMI | rs8024806  | T | 0.94 | 0.025 | 0.004 | 3.95E-13 | 0.022  | 0.016 | 1.80E-01 |
| BMI | rs11075489 | C | 0.53 | 0.012 | 0.002 | 8.88E-12 | 0.010  | 0.008 | 1.90E-01 |
| BMI | rs11866815 | C | 0.76 | 0.015 | 0.002 | 8.10E-16 | 0.013  | 0.009 | 1.60E-01 |
| BMI | rs12449219 | G | 0.14 | 0.016 | 0.003 | 2.83E-10 | 0.011  | 0.012 | 3.40E-01 |
| BMI | rs12922346 | C | 0.23 | 0.013 | 0.002 | 2.93E-11 | 0.018  | 0.009 | 4.10E-02 |
| BMI | rs194809   | A | 0.18 | 0.013 | 0.002 | 1.02E-08 | 0.012  | 0.010 | 2.30E-01 |
| BMI | rs2342892  | T | 0.45 | 0.013 | 0.002 | 1.25E-13 | -0.002 | 0.008 | 8.70E-01 |
| BMI | rs2601777  | G | 0.62 | 0.014 | 0.002 | 4.04E-17 | -0.003 | 0.008 | 7.30E-01 |

|          |             |   |      |        |       |           |        |       |          |
|----------|-------------|---|------|--------|-------|-----------|--------|-------|----------|
| BMI      | rs4609871   | T | 0.51 | 0.022  | 0.002 | 5.66E-38  | -0.002 | 0.008 | 8.60E-01 |
| BMI      | rs7206608   | G | 0.31 | 0.013  | 0.002 | 5.11E-13  | 0.016  | 0.008 | 4.00E-02 |
| BMI      | rs7498665   | G | 0.33 | 0.029  | 0.002 | 4.42E-63  | 0.016  | 0.008 | 3.90E-02 |
| BMI      | rs889398    | C | 0.58 | 0.020  | 0.002 | 3.62E-34  | 0.016  | 0.008 | 4.90E-02 |
| BMI      | rs9937053   | A | 0.44 | 0.072  | 0.002 | 0.00E+00  | 0.021  | 0.008 | 7.50E-03 |
| BMI      | rs1106908   | G | 0.55 | 0.016  | 0.002 | 8.09E-24  | -0.002 | 0.008 | 7.10E-01 |
| BMI      | rs11655587  | C | 0.68 | 0.021  | 0.002 | 8.64E-26  | 0.001  | 0.008 | 9.20E-01 |
| BMI      | rs12939549  | A | 0.57 | 0.018  | 0.002 | 2.32E-29  | -0.002 | 0.008 | 7.40E-01 |
| BMI      | rs1320251   | C | 0.51 | 0.018  | 0.002 | 2.19E-25  | 0.008  | 0.008 | 1.80E-01 |
| BMI      | rs2619976   | T | 0.38 | 0.011  | 0.002 | 5.43E-09  | 0.004  | 0.008 | 5.10E-01 |
| BMI      | rs3744017   | A | 0.20 | 0.014  | 0.002 | 2.65E-10  | 0.000  | 0.010 | 8.00E-01 |
| BMI      | rs3923783   | C | 0.82 | 0.022  | 0.002 | 6.06E-24  | 0.023  | 0.010 | 2.10E-02 |
| BMI      | rs3930349   | C | 0.77 | 0.014  | 0.002 | 2.56E-12  | -0.002 | 0.009 | 7.40E-01 |
| BMI      | rs6607337   | C | 0.70 | 0.012  | 0.002 | 6.74E-11  | 0.020  | 0.009 | 1.30E-02 |
| BMI      | rs8075273   | C | 0.74 | 0.014  | 0.002 | 2.72E-14  | -0.002 | 0.009 | 9.10E-01 |
| BMI      | rs1356506   | T | 0.64 | 0.014  | 0.002 | 2.72E-14  | 0.020  | 0.008 | 1.10E-02 |
| BMI      | rs594821    | C | 0.93 | 0.019  | 0.003 | 1.93E-10  | 0.006  | 0.014 | 7.70E-01 |
| BMI      | rs6567160   | C | 0.24 | 0.055  | 0.002 | 1.43E-185 | -0.004 | 0.009 | 8.60E-01 |
| BMI      | rs7238896   | G | 0.14 | 0.022  | 0.003 | 6.93E-15  | -0.003 | 0.011 | 8.10E-01 |
| BMI      | rs7239114   | A | 0.53 | 0.012  | 0.002 | 1.68E-12  | 0.008  | 0.008 | 2.20E-01 |
| BMI      | rs891387    | T | 0.53 | 0.021  | 0.002 | 2.01E-34  | 0.007  | 0.008 | 4.30E-01 |
| BMI      | rs10518269  | C | 0.82 | 0.017  | 0.002 | 5.41E-14  | 0.008  | 0.010 | 4.20E-01 |
| BMI      | rs11672660  | C | 0.79 | 0.034  | 0.002 | 2.76E-58  | -0.015 | 0.010 | 1.00E-01 |
| BMI      | rs12151152  | G | 0.59 | 0.021  | 0.002 | 8.64E-26  | 0.003  | 0.008 | 7.60E-01 |
| BMI      | rs12462975  | A | 0.29 | 0.019  | 0.002 | 8.01E-27  | -0.011 | 0.008 | 2.60E-01 |
| BMI      | rs273505    | C | 0.45 | 0.017  | 0.002 | 8.61E-20  | 0.035  | 0.008 | 1.20E-05 |
| BMI      | rs56356382  | T | 0.81 | 0.022  | 0.002 | 1.54E-19  | 0.018  | 0.010 | 7.70E-02 |
| BMI      | rs1409818   | T | 0.10 | 0.020  | 0.003 | 3.30E-12  | 0.024  | 0.013 | 1.00E-01 |
| BMI      | rs16989232  | A | 0.35 | 0.012  | 0.002 | 1.34E-11  | 0.000  | 0.008 | 8.70E-01 |
| BMI      | rs17201143  | C | 0.69 | 0.011  | 0.002 | 4.90E-10  | 0.004  | 0.008 | 5.90E-01 |
| BMI      | rs17806224  | G | 0.82 | 0.026  | 0.002 | 3.14E-32  | 0.031  | 0.010 | 2.00E-03 |
| BMI      | rs1884389   | C | 0.57 | 0.011  | 0.002 | 2.11E-10  | -0.010 | 0.008 | 2.10E-01 |
| BMI      | rs1884897   | G | 0.61 | 0.018  | 0.002 | 2.66E-27  | -0.007 | 0.008 | 3.20E-01 |
| BMI      | rs615568    | G | 0.49 | 0.010  | 0.002 | 2.83E-09  | 0.009  | 0.008 | 2.80E-01 |
| BMI      | rs6512302   | C | 0.74 | 0.013  | 0.002 | 2.08E-11  | 0.017  | 0.009 | 1.00E-01 |
| BMI      | rs8122855   | A | 0.35 | 0.014  | 0.002 | 2.72E-14  | 0.028  | 0.008 | 2.60E-04 |
| BMI      | rs140733155 | G | 0.01 | 0.056  | 0.009 | 2.73E-09  | 0.020  | 0.038 | 5.40E-01 |
| BMI      | rs2832283   | A | 0.27 | 0.012  | 0.002 | 8.92E-09  | -0.019 | 0.009 | 3.50E-02 |
| BMI      | rs427943    | C | 0.56 | 0.018  | 0.002 | 2.19E-25  | 0.012  | 0.008 | 1.00E-01 |
| BMI      | rs8134638   | C | 0.41 | 0.013  | 0.002 | 2.93E-11  | 0.003  | 0.008 | 7.90E-01 |
| BMI      | rs12628051  | T | 0.68 | 0.016  | 0.002 | 3.74E-19  | -0.009 | 0.008 | 2.80E-01 |
| BMI      | rs12628891  | C | 0.71 | 0.012  | 0.002 | 1.42E-09  | -0.004 | 0.008 | 6.50E-01 |
| Caffeine | rs115454798 | A | 0.87 | -0.023 | 0.003 | 1.10E-10  | 0.023  | 0.012 | 6.40E-02 |
| Caffeine | rs117810762 | G | 0.98 | -0.068 | 0.009 | 1.30E-14  | 0.031  | 0.030 | 2.60E-01 |
| Caffeine | rs1228024   | C | 0.34 | 0.014  | 0.002 | 1.30E-08  | -0.002 | 0.008 | 7.90E-01 |
| Caffeine | rs12514566  | G | 0.66 | 0.017  | 0.002 | 2.20E-12  | 0.012  | 0.008 | 1.20E-01 |
| Caffeine | rs12591786  | C | 0.84 | 0.020  | 0.003 | 3.90E-10  | 0.002  | 0.011 | 9.90E-01 |
| Caffeine | rs1260326   | T | 0.39 | -0.023 | 0.002 | 4.20E-22  | 0.039  | 0.008 | 4.10E-07 |
| Caffeine | rs12785227  | A | 0.69 | 0.015  | 0.003 | 6.50E-09  | -0.001 | 0.008 | 8.10E-01 |
| Caffeine | rs1490384   | C | 0.50 | -0.016 | 0.002 | 8.30E-12  | -0.006 | 0.008 | 5.60E-01 |
| Caffeine | rs17685     | G | 0.72 | -0.041 | 0.003 | 3.80E-56  | -0.005 | 0.009 | 4.70E-01 |
| Caffeine | rs215601    | A | 0.37 | 0.015  | 0.002 | 6.00E-10  | 0.018  | 0.008 | 4.50E-02 |
| Caffeine | rs2231142   | G | 0.89 | 0.039  | 0.004 | 1.10E-26  | 0.008  | 0.012 | 6.20E-01 |
| Caffeine | rs2472297   | C | 0.73 | -0.105 | 0.003 | 1.00E-200 | -0.006 | 0.009 | 5.40E-01 |
| Caffeine | rs2667773   | A | 0.69 | 0.015  | 0.003 | 2.50E-09  | 0.010  | 0.008 | 2.20E-01 |
| Caffeine | rs4240624   | G | 0.09 | 0.027  | 0.004 | 1.90E-11  | -0.022 | 0.014 | 1.00E-01 |



|                 |             |   |      |        |       |           |        |       |          |
|-----------------|-------------|---|------|--------|-------|-----------|--------|-------|----------|
| Caffeine        | rs4410790   | C | 0.62 | 0.150  | 0.017 | 2.36E-19  | 0.005  | 0.008 | 3.50E-01 |
| Caffeine        | rs4418728   | G | 0.55 | 0.014  | 0.002 | 7.00E-10  | 0.014  | 0.008 | 6.20E-02 |
| Caffeine        | rs489693    | C | 0.67 | -0.018 | 0.002 | 1.30E-12  | -0.003 | 0.008 | 5.70E-01 |
| Caffeine        | rs56113850  | T | 0.42 | -0.026 | 0.002 | 1.90E-29  | -0.012 | 0.008 | 1.40E-01 |
| Caffeine        | rs6062679   | T | 0.53 | -0.023 | 0.002 | 4.50E-22  | 0.002  | 0.008 | 9.90E-01 |
| Caffeine        | rs62332762  | C | 0.60 | 0.018  | 0.002 | 1.20E-14  | 0.000  | 0.008 | 9.50E-01 |
| Caffeine        | rs6265      | C | 0.81 | 0.022  | 0.003 | 3.40E-13  | 0.034  | 0.010 | 1.40E-03 |
| Caffeine        | rs7105462   | G | 0.41 | 0.014  | 0.002 | 2.10E-09  | 0.000  | 0.008 | 8.60E-01 |
| Caffeine        | rs78456557  | C | 0.90 | -0.024 | 0.004 | 1.20E-09  | -0.020 | 0.013 | 1.70E-01 |
| Caffeine        | rs9611527   | G | 0.66 | 0.020  | 0.002 | 1.00E-15  | 0.012  | 0.008 | 1.10E-01 |
| Caffeine_coffee | rs1057868   | C | 0.71 | -0.024 | 0.003 | 5.50E-22  | -0.006 | 0.009 | 4.10E-01 |
| Caffeine_coffee | rs11127048  | G | 0.38 | -0.020 | 0.002 | 8.10E-17  | 0.036  | 0.008 | 3.80E-06 |
| Caffeine_coffee | rs117810762 | G | 0.98 | -0.050 | 0.009 | 1.10E-08  | 0.031  | 0.030 | 2.60E-01 |
| Caffeine_coffee | rs12514566  | G | 0.66 | 0.015  | 0.002 | 1.00E-09  | 0.012  | 0.008 | 1.20E-01 |
| Caffeine_coffee | rs1327259   | A | 0.61 | 0.016  | 0.002 | 3.10E-11  | 0.001  | 0.008 | 9.80E-01 |
| Caffeine_coffee | rs181251778 | A | 0.99 | 0.073  | 0.010 | 1.50E-13  | 0.086  | 0.033 | 7.00E-03 |
| Caffeine_coffee | rs2298527   | G | 0.41 | 0.015  | 0.002 | 1.60E-10  | -0.001 | 0.008 | 8.30E-01 |
| Caffeine_coffee | rs2472297   | C | 0.73 | -0.065 | 0.003 | 3.10E-140 | -0.006 | 0.009 | 5.40E-01 |
| Caffeine_coffee | rs2521501   | A | 0.68 | 0.015  | 0.002 | 1.60E-09  | 0.010  | 0.008 | 2.50E-01 |
| Caffeine_coffee | rs2726513   | G | 0.59 | 0.015  | 0.002 | 7.00E-11  | -0.001 | 0.008 | 7.80E-01 |
| Caffeine_coffee | rs34060476  | A | 0.87 | -0.025 | 0.003 | 7.10E-14  | -0.013 | 0.011 | 2.30E-01 |
| Caffeine_coffee | rs35198275  | A | 0.87 | 0.021  | 0.003 | 8.20E-10  | -0.017 | 0.011 | 1.30E-01 |
| Caffeine_coffee | rs4410790   | T | 0.36 | -0.052 | 0.002 | 2.80E-104 | -0.005 | 0.008 | 3.50E-01 |
| Caffeine_coffee | rs4615895   | G | 0.26 | -0.017 | 0.003 | 8.60E-11  | -0.001 | 0.009 | 9.00E-01 |
| Caffeine_coffee | rs56113850  | T | 0.42 | -0.021 | 0.002 | 4.90E-19  | -0.012 | 0.008 | 1.40E-01 |
| Caffeine_coffee | rs6063085   | A | 0.63 | -0.016 | 0.002 | 3.40E-11  | -0.024 | 0.008 | 1.90E-03 |
| Caffeine_coffee | rs66723169  | C | 0.77 | -0.022 | 0.003 | 1.80E-16  | 0.008  | 0.009 | 5.70E-01 |
| Caffeine_coffee | rs6893807   | A | 0.84 | -0.019 | 0.003 | 1.30E-09  | -0.022 | 0.011 | 4.90E-02 |
| Caffeine_coffee | rs7571970   | T | 0.17 | -0.021 | 0.003 | 9.40E-12  | 0.005  | 0.010 | 6.30E-01 |
| Caffeine_coffee | rs76881016  | A | 0.93 | -0.026 | 0.004 | 6.60E-09  | -0.026 | 0.015 | 9.60E-02 |
| Caffeine_tea    | rs10741694  | T | 0.37 | -0.015 | 0.002 | 1.80E-10  | -0.007 | 0.008 | 5.10E-01 |
| Caffeine_tea    | rs11022752  | A | 0.73 | -0.015 | 0.003 | 1.20E-09  | -0.004 | 0.009 | 6.00E-01 |
| Caffeine_tea    | rs11204711  | A | 0.62 | -0.014 | 0.002 | 6.40E-10  | 0.011  | 0.008 | 1.90E-01 |
| Caffeine_tea    | rs12591786  | C | 0.84 | 0.020  | 0.003 | 3.00E-10  | 0.002  | 0.011 | 9.90E-01 |
| Caffeine_tea    | rs132919    | G | 0.23 | -0.017 | 0.003 | 2.40E-10  | -0.007 | 0.009 | 3.90E-01 |
| Caffeine_tea    | rs140775622 | C | 0.83 | -0.023 | 0.003 | 1.80E-12  | 0.002  | 0.011 | 9.70E-01 |
| Caffeine_tea    | rs1481012   | A | 0.89 | 0.026  | 0.004 | 1.90E-13  | 0.006  | 0.012 | 7.20E-01 |
| Caffeine_tea    | rs17685     | G | 0.72 | -0.024 | 0.002 | 7.20E-22  | -0.005 | 0.009 | 4.70E-01 |
| Caffeine_tea    | rs192084998 | G | 0.70 | 0.016  | 0.002 | 1.20E-10  | 0.006  | 0.008 | 3.70E-01 |
| Caffeine_tea    | rs2117137   | A | 0.59 | -0.013 | 0.002 | 2.90E-09  | 0.000  | 0.008 | 9.60E-01 |
| Caffeine_tea    | rs2465018   | G | 0.77 | -0.022 | 0.003 | 1.10E-16  | -0.001 | 0.009 | 7.80E-01 |
| Caffeine_tea    | rs2472297   | C | 0.73 | -0.054 | 0.003 | 3.30E-102 | -0.006 | 0.009 | 5.40E-01 |
| Caffeine_tea    | rs28429148  | G | 0.57 | 0.013  | 0.002 | 8.20E-09  | -0.020 | 0.008 | 1.30E-02 |
| Caffeine_tea    | rs4410790   | T | 0.37 | -0.040 | 0.002 | 1.10E-67  | -0.005 | 0.008 | 3.50E-01 |
| Caffeine_tea    | rs4817505   | T | 0.61 | -0.015 | 0.002 | 4.20E-11  | 0.009  | 0.008 | 1.80E-01 |
| Caffeine_tea    | rs56188862  | T | 0.61 | 0.017  | 0.002 | 2.40E-13  | -0.007 | 0.008 | 3.80E-01 |
| Caffeine_tea    | rs62534435  | C | 0.80 | -0.016 | 0.003 | 4.40E-09  | -0.003 | 0.010 | 7.30E-01 |
| Caffeine_tea    | rs73053413  | C | 0.84 | 0.022  | 0.003 | 7.10E-13  | 0.007  | 0.010 | 5.10E-01 |
| Caffeine_tea    | rs9624470   | G | 0.42 | -0.025 | 0.002 | 6.80E-29  | -0.004 | 0.008 | 6.30E-01 |
| Coffee          | rs574367    | T | 0.21 | 0.021  | 0.004 | 5.43E-09  | 0.001  | 0.010 | 8.70E-01 |
| Coffee          | rs10865548  | G | 0.83 | 0.031  | 0.004 | 5.26E-16  | -0.004 | 0.010 | 6.80E-01 |
| Coffee          | rs1260326   | C | 0.61 | 0.027  | 0.003 | 1.23E-19  | -0.039 | 0.008 | 4.10E-07 |
| Coffee          | rs1057868   | T | 0.29 | 0.039  | 0.003 | 7.76E-35  | 0.006  | 0.009 | 4.10E-01 |
| Coffee          | rs34060476  | G | 0.13 | 0.038  | 0.004 | 8.63E-18  | 0.013  | 0.011 | 2.30E-01 |
| Coffee          | rs4410790   | C | 0.63 | 0.079  | 0.003 | 4.61E-152 | 0.005  | 0.008 | 3.50E-01 |
| Coffee          | rs73073176  | C | 0.87 | 0.046  | 0.004 | 8.64E-26  | 0.011  | 0.011 | 3.80E-01 |



|          |            |   |      |        |       |           |        |       |          |
|----------|------------|---|------|--------|-------|-----------|--------|-------|----------|
| Coffee   | rs597045   | A | 0.69 | 0.021  | 0.003 | 2.27E-11  | -0.006 | 0.009 | 3.60E-01 |
| Coffee   | rs1956218  | G | 0.56 | 0.016  | 0.003 | 4.59E-08  | -0.012 | 0.008 | 1.30E-01 |
| Coffee   | rs2472297  | T | 0.27 | 0.091  | 0.003 | 4.02E-157 | 0.006  | 0.009 | 5.40E-01 |
| Coffee   | rs66723169 | A | 0.23 | 0.029  | 0.004 | 3.17E-16  | -0.008 | 0.009 | 5.70E-01 |
| Coffee   | rs2330783  | G | 0.99 | 0.091  | 0.013 | 6.46E-13  | 0.087  | 0.033 | 8.10E-03 |
| CigPDay  | rs11725618 | C | 0.31 | 0.036  | 0.006 | 4.72E-09  | 0.002  | 0.009 | 7.80E-01 |
| CigPDay  | rs11852372 | C | 0.36 | 0.182  | 0.006 | 2.96E-209 | -0.010 | 0.008 | 1.40E-01 |
| CigPDay  | rs13141210 | T | 0.50 | -0.031 | 0.006 | 2.72E-08  | 0.000  | 0.008 | 6.20E-01 |
| CigPDay  | rs2072659  | G | 0.10 | -0.065 | 0.009 | 1.70E-12  | 0.018  | 0.013 | 2.20E-01 |
| CigPDay  | rs2084533  | T | 0.31 | 0.034  | 0.006 | 1.19E-08  | -0.012 | 0.008 | 1.10E-01 |
| CigPDay  | rs215600   | A | 0.67 | -0.049 | 0.006 | 1.11E-17  | -0.021 | 0.008 | 2.00E-02 |
| CigPDay  | rs2273500  | C | 0.15 | 0.068  | 0.008 | 2.44E-18  | 0.004  | 0.011 | 6.80E-01 |
| CigPDay  | rs2386571  | C | 0.58 | -0.032 | 0.006 | 1.02E-08  | -0.011 | 0.008 | 1.40E-01 |
| CigPDay  | rs2424888  | A | 0.36 | 0.033  | 0.006 | 2.83E-09  | -0.007 | 0.008 | 4.30E-01 |
| CigPDay  | rs3025383  | C | 0.18 | -0.058 | 0.007 | 2.22E-16  | -0.003 | 0.010 | 9.30E-01 |
| CigPDay  | rs4785587  | A | 0.48 | -0.034 | 0.006 | 1.24E-09  | -0.006 | 0.008 | 4.40E-01 |
| CigPDay  | rs56113850 | C | 0.59 | 0.107  | 0.006 | 1.39E-81  | 0.012  | 0.008 | 1.40E-01 |
| CigPDay  | rs58379124 | C | 0.77 | 0.067  | 0.007 | 7.37E-25  | 0.014  | 0.009 | 1.90E-01 |
| CigPDay  | rs632811   | G | 0.35 | -0.037 | 0.006 | 1.02E-08  | 0.015  | 0.008 | 5.00E-02 |
| CigPDay  | rs7431710  | A | 0.66 | -0.035 | 0.006 | 1.78E-09  | 0.004  | 0.008 | 5.20E-01 |
| CigPDay  | rs76164573 | G | 0.05 | -0.072 | 0.013 | 3.70E-08  | -0.012 | 0.017 | 5.50E-01 |
| CigPDay  | rs790564   | C | 0.73 | -0.041 | 0.006 | 4.03E-11  | -0.014 | 0.009 | 1.30E-01 |
| CigPDay  | rs7928017  | A | 0.41 | -0.033 | 0.006 | 3.13E-09  | -0.008 | 0.008 | 4.00E-01 |
| CigPDay  | rs806798   | C | 0.53 | -0.031 | 0.006 | 2.45E-08  | -0.010 | 0.008 | 1.80E-01 |
| Drinking | rs10753661 | A | 0.68 | -0.009 | 0.002 | 3.70E-08  | -0.001 | 0.008 | 7.30E-01 |
| Drinking | rs12088813 | C | 0.27 | -0.009 | 0.002 | 1.54E-08  | -0.006 | 0.009 | 7.00E-01 |
| Drinking | rs28680958 | A | 0.22 | -0.011 | 0.002 | 5.20E-10  | -0.001 | 0.009 | 8.40E-01 |
| Drinking | rs5024204  | T | 0.28 | 0.010  | 0.002 | 2.55E-09  | -0.012 | 0.009 | 1.20E-01 |
| Drinking | rs58107686 | A | 0.33 | -0.010 | 0.002 | 7.84E-10  | 0.001  | 0.008 | 9.40E-01 |
| Drinking | rs705687   | G | 0.79 | -0.011 | 0.002 | 8.25E-10  | -0.001 | 0.009 | 8.80E-01 |
| Drinking | rs823114   | A | 0.55 | 0.009  | 0.001 | 2.30E-09  | 0.000  | 0.008 | 9.50E-01 |
| Drinking | rs11692435 | A | 0.09 | 0.017  | 0.003 | 2.54E-11  | 0.015  | 0.015 | 3.60E-01 |
| Drinking | rs1260326  | C | 0.60 | 0.021  | 0.001 | 9.43E-45  | -0.039 | 0.008 | 4.10E-07 |
| Drinking | rs13024996 | A | 0.36 | -0.011 | 0.002 | 5.84E-13  | -0.010 | 0.008 | 3.60E-01 |
| Drinking | rs13032049 | G | 0.28 | 0.010  | 0.002 | 2.96E-10  | 0.009  | 0.009 | 2.40E-01 |
| Drinking | rs13383034 | T | 0.33 | 0.015  | 0.002 | 6.40E-22  | 0.015  | 0.008 | 3.40E-02 |
| Drinking | rs56337305 | C | 0.38 | -0.010 | 0.001 | 1.60E-10  | 0.001  | 0.008 | 9.80E-01 |
| Drinking | rs72859280 | T | 0.04 | 0.023  | 0.004 | 4.49E-09  | 0.019  | 0.021 | 3.70E-01 |
| Drinking | rs77165542 | T | 0.03 | -0.026 | 0.004 | 5.76E-11  | -0.049 | 0.021 | 2.20E-02 |
| Drinking | rs828867   | A | 0.55 | 0.009  | 0.001 | 2.19E-09  | 0.001  | 0.008 | 9.80E-01 |
| Drinking | rs13066454 | T | 0.40 | -0.009 | 0.001 | 4.05E-09  | -0.018 | 0.008 | 1.80E-02 |
| Drinking | rs13094887 | T | 0.30 | -0.010 | 0.002 | 8.67E-11  | -0.023 | 0.008 | 7.60E-03 |
| Drinking | rs2011092  | C | 0.34 | -0.009 | 0.002 | 7.50E-09  | 0.006  | 0.008 | 5.60E-01 |
| Drinking | rs62250685 | G | 0.61 | -0.014 | 0.002 | 1.06E-21  | -0.001 | 0.008 | 9.90E-01 |
| Drinking | rs6787172  | G | 0.55 | -0.008 | 0.001 | 4.32E-08  | -0.006 | 0.008 | 4.60E-01 |
| Drinking | rs9838144  | C | 0.21 | -0.010 | 0.002 | 2.72E-08  | 0.011  | 0.010 | 2.40E-01 |
| Drinking | rs11940694 | G | 0.60 | 0.026  | 0.001 | 2.68E-68  | 0.011  | 0.008 | 2.70E-01 |
| Drinking | rs1229984  | C | 0.96 | 0.151  | 0.004 | 0.00E+00  | 0.158  | 0.025 | 7.00E-10 |
| Drinking | rs12651313 | G | 0.44 | -0.009 | 0.001 | 3.85E-09  | -0.007 | 0.008 | 3.70E-01 |
| Drinking | rs13107325 | T | 0.07 | -0.028 | 0.003 | 1.56E-22  | 0.011  | 0.015 | 4.00E-01 |
| Drinking | rs2165670  | A | 0.11 | 0.023  | 0.002 | 1.64E-22  | 0.042  | 0.013 | 1.80E-03 |
| Drinking | rs36052336 | G | 0.06 | -0.018 | 0.003 | 1.24E-09  | 0.002  | 0.016 | 1.00E+00 |
| Drinking | rs3748034  | T | 0.14 | -0.012 | 0.002 | 1.71E-08  | -0.011 | 0.011 | 4.20E-01 |
| Drinking | rs4501255  | G | 0.24 | 0.011  | 0.002 | 4.94E-10  | -0.012 | 0.009 | 1.90E-01 |
| Drinking | rs4690727  | G | 0.72 | 0.011  | 0.002 | 2.42E-11  | -0.014 | 0.009 | 1.00E-01 |
| Drinking | rs4699791  | A | 0.10 | 0.019  | 0.002 | 6.55E-14  | 0.016  | 0.013 | 2.50E-01 |

|          |             |   |      |        |       |          |        |       |          |
|----------|-------------|---|------|--------|-------|----------|--------|-------|----------|
| Drinking | rs79139602  | T | 0.02 | 0.060  | 0.005 | 1.61E-32 | 0.050  | 0.028 | 1.20E-01 |
| Drinking | rs12655091  | A | 0.53 | -0.008 | 0.001 | 1.25E-08 | 0.000  | 0.008 | 8.40E-01 |
| Drinking | rs4916723   | C | 0.42 | -0.010 | 0.001 | 1.69E-11 | 0.001  | 0.008 | 8.80E-01 |
| Drinking | rs55872084  | T | 0.24 | 0.010  | 0.002 | 6.43E-09 | 0.006  | 0.009 | 5.20E-01 |
| Drinking | rs10236149  | G | 0.12 | -0.013 | 0.002 | 1.18E-09 | -0.055 | 0.012 | 3.90E-06 |
| Drinking | rs35034355  | A | 0.52 | -0.008 | 0.001 | 2.86E-08 | 0.007  | 0.008 | 4.10E-01 |
| Drinking | rs6460047   | C | 0.21 | 0.012  | 0.002 | 9.61E-11 | 0.018  | 0.010 | 5.10E-02 |
| Drinking | rs6951574   | C | 0.46 | 0.013  | 0.001 | 1.58E-19 | 0.003  | 0.008 | 7.20E-01 |
| Drinking | rs1217091   | C | 0.81 | 0.012  | 0.002 | 7.07E-11 | -0.017 | 0.010 | 9.90E-02 |
| Drinking | rs13250583  | T | 0.21 | -0.010 | 0.002 | 4.79E-08 | 0.007  | 0.009 | 4.30E-01 |
| Drinking | rs28601761  | G | 0.42 | 0.009  | 0.001 | 7.07E-10 | -0.047 | 0.008 | 2.00E-09 |
| Drinking | rs10978550  | C | 0.21 | -0.012 | 0.002 | 7.07E-11 | 0.006  | 0.010 | 4.10E-01 |
| Drinking | rs55932213  | G | 0.74 | 0.009  | 0.002 | 9.70E-09 | 0.001  | 0.009 | 9.70E-01 |
| Drinking | rs17665139  | T | 0.15 | -0.012 | 0.002 | 1.62E-08 | -0.003 | 0.011 | 7.50E-01 |
| Drinking | rs7074871   | A | 0.26 | -0.009 | 0.002 | 1.89E-08 | 0.012  | 0.009 | 1.90E-01 |
| Drinking | rs10750025  | T | 0.69 | 0.010  | 0.002 | 4.94E-11 | 0.011  | 0.008 | 3.10E-01 |
| Drinking | rs11030084  | T | 0.18 | -0.011 | 0.002 | 1.71E-08 | -0.035 | 0.010 | 1.20E-03 |
| Drinking | rs12795042  | C | 0.62 | -0.008 | 0.002 | 3.17E-08 | -0.024 | 0.008 | 2.80E-03 |
| Drinking | rs1713676   | G | 0.52 | -0.008 | 0.001 | 4.32E-08 | 0.013  | 0.008 | 1.00E-01 |
| Drinking | rs4938230   | A | 0.84 | 0.013  | 0.002 | 1.45E-10 | 0.026  | 0.011 | 1.40E-02 |
| Drinking | rs56030824  | A | 0.32 | -0.012 | 0.002 | 1.15E-13 | -0.001 | 0.008 | 9.50E-01 |
| Drinking | rs682011    | C | 0.56 | 0.008  | 0.001 | 2.21E-08 | -0.007 | 0.008 | 3.80E-01 |
| Drinking | rs7950166   | T | 0.64 | -0.010 | 0.002 | 1.01E-10 | 0.024  | 0.008 | 1.90E-03 |
| Drinking | rs10506274  | T | 0.48 | -0.009 | 0.001 | 5.76E-10 | 0.000  | 0.008 | 9.80E-01 |
| Drinking | rs10876188  | T | 0.46 | -0.008 | 0.001 | 4.79E-08 | -0.008 | 0.008 | 3.50E-01 |
| Drinking | rs3809162   | G | 0.40 | 0.009  | 0.001 | 1.18E-09 | 0.004  | 0.008 | 5.30E-01 |
| Drinking | rs4842786   | A | 0.58 | -0.009 | 0.001 | 2.68E-09 | -0.001 | 0.008 | 9.50E-01 |
| Drinking | rs500321    | T | 0.74 | -0.010 | 0.002 | 4.97E-09 | 0.005  | 0.009 | 4.80E-01 |
| Drinking | rs1123285   | G | 0.34 | -0.009 | 0.002 | 8.32E-09 | -0.014 | 0.008 | 7.60E-02 |
| Drinking | rs11625650  | A | 0.23 | -0.010 | 0.002 | 2.86E-08 | 0.000  | 0.009 | 8.20E-01 |
| Drinking | rs2180870   | C | 0.14 | -0.012 | 0.002 | 1.13E-08 | 0.015  | 0.011 | 9.50E-02 |
| Drinking | rs28929474  | T | 0.02 | -0.037 | 0.005 | 1.31E-11 | -0.026 | 0.028 | 2.80E-01 |
| Drinking | rs12907323  | G | 0.41 | 0.008  | 0.001 | 9.70E-09 | 0.003  | 0.008 | 7.80E-01 |
| Drinking | rs2472297   | T | 0.25 | 0.011  | 0.002 | 3.12E-10 | 0.006  | 0.009 | 5.40E-01 |
| Drinking | rs1104608   | C | 0.43 | -0.011 | 0.001 | 1.03E-13 | -0.004 | 0.008 | 6.80E-01 |
| Drinking | rs113443718 | A | 0.31 | -0.010 | 0.002 | 1.18E-10 | 0.017  | 0.008 | 2.80E-02 |
| Drinking | rs17177078  | T | 0.06 | -0.022 | 0.003 | 1.27E-13 | -0.016 | 0.017 | 3.10E-01 |
| Drinking | rs2764771   | A | 0.31 | 0.010  | 0.002 | 4.03E-10 | 0.002  | 0.008 | 8.50E-01 |
| Drinking | rs378421    | A | 0.40 | -0.011 | 0.001 | 4.82E-14 | 0.013  | 0.008 | 7.40E-02 |
| Drinking | rs62044525  | G | 0.18 | -0.012 | 0.002 | 1.01E-10 | -0.017 | 0.010 | 6.00E-02 |
| Drinking | rs7185555   | C | 0.15 | -0.011 | 0.002 | 4.32E-08 | -0.002 | 0.011 | 9.80E-01 |
| Drinking | rs79616692  | C | 0.11 | 0.016  | 0.002 | 4.05E-12 | -0.003 | 0.013 | 8.90E-01 |
| Drinking | rs10438820  | T | 0.70 | 0.009  | 0.002 | 1.80E-08 | 0.007  | 0.008 | 4.60E-01 |
| Drinking | rs2854334   | G | 0.62 | 0.009  | 0.001 | 7.45E-10 | 0.002  | 0.008 | 6.70E-01 |
| Drinking | rs3803800   | G | 0.79 | 0.011  | 0.002 | 1.52E-10 | -0.022 | 0.010 | 2.10E-02 |
| Drinking | rs4548913   | A | 0.63 | -0.008 | 0.002 | 3.17E-08 | 0.001  | 0.008 | 9.90E-01 |
| Drinking | rs4092465   | G | 0.64 | -0.008 | 0.002 | 4.32E-08 | 0.007  | 0.008 | 3.10E-01 |
| Drinking | rs9950000   | T | 0.40 | -0.009 | 0.001 | 9.62E-10 | 0.004  | 0.008 | 4.90E-01 |
| Drinking | rs281379    | A | 0.51 | 0.014  | 0.001 | 4.83E-21 | 0.009  | 0.008 | 2.20E-01 |
| Drinking | rs4815364   | A | 0.62 | 0.009  | 0.001 | 1.02E-08 | 0.005  | 0.008 | 4.50E-01 |
| Drinking | rs9607814   | A | 0.20 | -0.010 | 0.002 | 4.32E-08 | -0.004 | 0.010 | 6.00E-01 |
| FG       | rs2075423   | T | 0.38 | -0.016 | 0.002 | 2.78E-21 | -0.010 | 0.008 | 1.80E-01 |
| FG       | rs348330    | A | 0.63 | -0.012 | 0.002 | 1.06E-09 | -0.012 | 0.008 | 9.80E-02 |
| FG       | rs6662924   | A | 0.20 | 0.014  | 0.002 | 5.05E-10 | -0.016 | 0.010 | 1.10E-01 |
| FG       | rs78132593  | A | 0.20 | -0.015 | 0.002 | 2.36E-11 | 0.016  | 0.009 | 9.90E-02 |
| FG       | rs1057394   | A | 0.63 | -0.012 | 0.002 | 5.62E-12 | 0.026  | 0.008 | 1.30E-03 |

|    |             |   |      |        |       |           |        |       |          |
|----|-------------|---|------|--------|-------|-----------|--------|-------|----------|
| FG | rs1260326   | T | 0.41 | -0.028 | 0.002 | 8.48E-62  | 0.039  | 0.008 | 4.10E-07 |
| FG | rs13389076  | A | 0.03 | 0.061  | 0.005 | 1.83E-35  | 0.045  | 0.033 | 2.30E-01 |
| FG | rs13431652  | T | 0.68 | 0.069  | 0.002 | 0.00E+00  | -0.002 | 0.008 | 6.60E-01 |
| FG | rs140809953 | A | 0.02 | 0.037  | 0.007 | 4.31E-07  | -0.040 | 0.032 | 2.20E-01 |
| FG | rs180935712 | A | 0.01 | 0.057  | 0.008 | 3.62E-12  | -0.030 | 0.029 | 2.70E-01 |
| FG | rs189548    | A | 0.72 | -0.012 | 0.002 | 7.75E-10  | 0.002  | 0.009 | 8.10E-01 |
| FG | rs7584277   | A | 0.08 | 0.027  | 0.004 | 1.48E-13  | 0.012  | 0.015 | 4.20E-01 |
| FG | rs77981966  | T | 0.06 | -0.025 | 0.004 | 2.09E-12  | 0.003  | 0.015 | 8.60E-01 |
| FG | rs11708067  | A | 0.82 | 0.028  | 0.002 | 7.70E-45  | -0.023 | 0.009 | 1.10E-02 |
| FG | rs1604038   | T | 0.29 | -0.020 | 0.002 | 3.82E-28  | 0.015  | 0.009 | 4.40E-02 |
| FG | rs16851397  | A | 0.96 | 0.033  | 0.004 | 6.93E-15  | 0.007  | 0.018 | 7.80E-01 |
| FG | rs17437560  | T | 0.11 | -0.018 | 0.003 | 4.53E-08  | -0.017 | 0.013 | 2.50E-01 |
| FG | rs6808574   | T | 0.39 | -0.013 | 0.002 | 7.98E-14  | -0.001 | 0.008 | 8.60E-01 |
| FG | rs4862423   | T | 0.40 | 0.012  | 0.002 | 9.56E-11  | 0.009  | 0.008 | 2.70E-01 |
| FG | rs157512    | T | 0.73 | 0.013  | 0.002 | 1.76E-10  | 0.011  | 0.009 | 2.80E-01 |
| FG | rs1820176   | T | 0.70 | 0.025  | 0.002 | 4.87E-35  | -0.005 | 0.009 | 4.70E-01 |
| FG | rs7708285   | A | 0.69 | -0.013 | 0.002 | 2.56E-12  | -0.009 | 0.008 | 2.70E-01 |
| FG | rs10305457  | T | 0.06 | 0.024  | 0.003 | 2.08E-13  | -0.009 | 0.013 | 5.40E-01 |
| FG | rs12055786  | T | 0.38 | 0.012  | 0.002 | 1.68E-12  | 0.009  | 0.008 | 4.40E-01 |
| FG | rs3778321   | A | 0.18 | -0.019 | 0.002 | 8.21E-19  | -0.013 | 0.010 | 2.40E-01 |
| FG | rs9348441   | A | 0.27 | 0.018  | 0.002 | 1.40E-22  | 0.001  | 0.009 | 8.30E-01 |
| FG | rs10487796  | A | 0.48 | -0.026 | 0.002 | 8.04E-60  | -0.001 | 0.008 | 7.40E-01 |
| FG | rs17168486  | T | 0.18 | 0.028  | 0.002 | 1.48E-40  | 0.005  | 0.010 | 7.10E-01 |
| FG | rs194518    | A | 0.52 | 0.010  | 0.002 | 1.46E-08  | -0.004 | 0.008 | 5.00E-01 |
| FG | rs2595701   | A | 0.32 | 0.019  | 0.002 | 2.26E-19  | -0.023 | 0.008 | 4.70E-03 |
| FG | rs58925536  | T | 0.03 | 0.031  | 0.005 | 7.76E-09  | -0.015 | 0.021 | 4.90E-01 |
| FG | rs878521    | A | 0.25 | 0.055  | 0.002 | 6.95E-166 | -0.003 | 0.009 | 8.60E-01 |
| FG | rs12541643  | T | 0.48 | 0.012  | 0.002 | 5.28E-10  | 0.008  | 0.008 | 2.70E-01 |
| FG | rs7012637   | A | 0.47 | -0.018 | 0.002 | 3.38E-26  | 0.002  | 0.008 | 8.40E-01 |
| FG | rs896854    | T | 0.46 | 0.010  | 0.002 | 6.11E-10  | 0.007  | 0.008 | 3.40E-01 |
| FG | rs9650069   | T | 0.28 | -0.029 | 0.002 | 7.57E-57  | 0.006  | 0.008 | 5.80E-01 |
| FG | rs10811660  | A | 0.17 | -0.022 | 0.002 | 3.81E-24  | 0.003  | 0.010 | 7.10E-01 |
| FG | rs10974438  | A | 0.62 | -0.020 | 0.002 | 2.38E-31  | 0.008  | 0.008 | 3.30E-01 |
| FG | rs16913693  | T | 0.97 | 0.039  | 0.005 | 8.92E-16  | 0.012  | 0.025 | 6.80E-01 |
| FG | rs3829109   | A | 0.28 | -0.016 | 0.002 | 3.64E-16  | -0.018 | 0.009 | 4.30E-02 |
| FG | rs507666    | A | 0.19 | 0.016  | 0.002 | 5.74E-15  | 0.023  | 0.010 | 1.90E-02 |
| FG | rs12784552  | A | 0.92 | 0.033  | 0.003 | 5.53E-28  | -0.042 | 0.013 | 1.70E-03 |
| FG | rs2839671   | A | 0.16 | -0.016 | 0.002 | 3.52E-13  | -0.008 | 0.010 | 3.10E-01 |
| FG | rs7095788   | T | 0.36 | -0.011 | 0.002 | 3.89E-09  | -0.017 | 0.008 | 4.00E-02 |
| FG | rs7903146   | T | 0.31 | 0.026  | 0.002 | 2.60E-42  | 0.010  | 0.009 | 2.10E-01 |
| FG | rs10838524  | A | 0.48 | 0.024  | 0.002 | 4.79E-50  | 0.004  | 0.008 | 6.00E-01 |
| FG | rs10838693  | C | 0.31 | 0.018  | 0.002 | 8.09E-23  | -0.008 | 0.008 | 3.30E-01 |
| FG | rs11020124  | T | 0.72 | -0.060 | 0.002 | 3.79E-218 | 0.000  | 0.009 | 8.50E-01 |
| FG | rs11603349  | T | 0.83 | 0.024  | 0.002 | 7.58E-27  | 0.004  | 0.011 | 6.70E-01 |
| FG | rs174583    | T | 0.38 | -0.017 | 0.002 | 4.97E-23  | -0.001 | 0.008 | 9.90E-01 |
| FG | rs192701415 | A | 0.90 | 0.020  | 0.003 | 3.38E-09  | 0.014  | 0.014 | 3.10E-01 |
| FG | rs3842753   | T | 0.28 | 0.013  | 0.002 | 1.12E-09  | -0.002 | 0.009 | 7.60E-01 |
| FG | rs11610045  | A | 0.45 | 0.014  | 0.002 | 3.48E-14  | 0.006  | 0.008 | 5.20E-01 |
| FG | rs2657879   | A | 0.80 | -0.012 | 0.002 | 6.33E-08  | -0.015 | 0.010 | 1.90E-01 |
| FG | rs4760278   | A | 0.18 | -0.011 | 0.002 | 3.80E-08  | -0.006 | 0.009 | 5.40E-01 |
| FG | rs6489811   | A | 0.49 | -0.011 | 0.002 | 9.89E-10  | -0.002 | 0.008 | 8.90E-01 |
| FG | rs6538804   | C | 0.62 | 0.014  | 0.002 | 7.80E-14  | -0.001 | 0.008 | 9.00E-01 |
| FG | rs11619319  | A | 0.77 | -0.017 | 0.002 | 5.15E-18  | -0.002 | 0.009 | 6.70E-01 |
| FG | rs12888855  | A | 0.19 | -0.014 | 0.002 | 1.48E-11  | -0.003 | 0.009 | 8.00E-01 |
| FG | rs35889227  | T | 0.62 | -0.013 | 0.002 | 7.80E-12  | -0.004 | 0.008 | 6.90E-01 |
| FG | rs12898997  | T | 0.60 | -0.010 | 0.002 | 8.18E-09  | 0.005  | 0.008 | 5.60E-01 |

|      |             |   |      |        |       |          |        |       |          |
|------|-------------|---|------|--------|-------|----------|--------|-------|----------|
| FG   | rs17270243  | A | 0.76 | -0.010 | 0.002 | 7.33E-07 | 0.003  | 0.009 | 7.20E-01 |
| FG   | rs6598541   | A | 0.35 | 0.011  | 0.002 | 2.00E-11 | -0.006 | 0.008 | 4.50E-01 |
| FG   | rs7163757   | T | 0.43 | -0.022 | 0.002 | 6.68E-42 | 0.008  | 0.008 | 2.70E-01 |
| FG   | rs7178572   | A | 0.32 | -0.012 | 0.002 | 1.79E-11 | -0.020 | 0.009 | 1.80E-02 |
| FG   | rs2238435   | C | 0.38 | 0.011  | 0.002 | 3.75E-09 | -0.009 | 0.008 | 2.70E-01 |
| FG   | rs17265513  | T | 0.80 | -0.016 | 0.002 | 5.32E-14 | -0.008 | 0.010 | 2.80E-01 |
| FG   | rs6113722   | A | 0.07 | -0.042 | 0.004 | 5.61E-22 | -0.006 | 0.021 | 8.30E-01 |
| FG   | rs39713     | T | 0.06 | -0.017 | 0.003 | 4.99E-08 | -0.009 | 0.013 | 5.00E-01 |
| FI   | rs6674544   | A | 0.57 | 0.018  | 0.002 | 8.75E-19 | 0.016  | 0.008 | 6.30E-02 |
| FI   | rs1260326   | T | 0.41 | -0.023 | 0.002 | 5.21E-34 | 0.039  | 0.008 | 4.10E-07 |
| FI   | rs13389219  | T | 0.41 | -0.020 | 0.002 | 1.14E-25 | -0.036 | 0.008 | 1.00E-05 |
| FI   | rs2943646   | A | 0.38 | -0.025 | 0.002 | 1.53E-39 | -0.018 | 0.008 | 1.90E-02 |
| FI   | rs5017305   | A | 0.24 | 0.014  | 0.003 | 1.37E-07 | 0.004  | 0.010 | 7.30E-01 |
| FI   | rs10865959  | C | 0.30 | 0.014  | 0.002 | 3.55E-10 | 0.030  | 0.008 | 1.80E-04 |
| FI   | rs11708067  | A | 0.82 | -0.014 | 0.002 | 4.37E-09 | -0.023 | 0.009 | 1.10E-02 |
| FI   | rs17036126  | T | 0.13 | 0.021  | 0.003 | 3.25E-12 | 0.005  | 0.011 | 5.90E-01 |
| FI   | rs17331151  | T | 0.11 | -0.016 | 0.003 | 1.73E-07 | -0.018 | 0.012 | 1.70E-01 |
| FI   | rs35000407  | T | 0.88 | 0.026  | 0.003 | 3.13E-20 | 0.048  | 0.012 | 8.90E-05 |
| FI   | rs62271373  | A | 0.06 | 0.026  | 0.005 | 9.64E-08 | 0.046  | 0.017 | 6.40E-03 |
| FI   | rs11727676  | T | 0.92 | -0.020 | 0.004 | 1.94E-07 | -0.008 | 0.013 | 5.00E-01 |
| FI   | rs3775380   | A | 0.50 | -0.012 | 0.002 | 3.81E-11 | -0.013 | 0.008 | 6.60E-02 |
| FI   | rs6855363   | T | 0.65 | 0.013  | 0.002 | 4.10E-10 | 0.018  | 0.008 | 2.80E-02 |
| FI   | rs9884482   | T | 0.61 | -0.013 | 0.002 | 4.74E-11 | 0.013  | 0.008 | 1.30E-01 |
| FI   | rs10050393  | T | 0.54 | 0.009  | 0.002 | 2.17E-06 | 0.015  | 0.008 | 6.40E-02 |
| FI   | rs459193    | A | 0.29 | -0.018 | 0.002 | 6.75E-18 | -0.014 | 0.009 | 1.60E-01 |
| FI   | rs4865796   | A | 0.71 | 0.017  | 0.002 | 1.58E-16 | 0.025  | 0.008 | 2.10E-03 |
| FI   | rs116141873 | T | 0.03 | 0.043  | 0.006 | 4.04E-13 | 0.041  | 0.018 | 2.50E-02 |
| FI   | rs1474696   | A | 0.52 | -0.015 | 0.002 | 3.17E-16 | -0.024 | 0.008 | 2.80E-03 |
| FI   | rs2780215   | A | 0.96 | 0.039  | 0.006 | 4.90E-10 | 0.013  | 0.017 | 4.60E-01 |
| FI   | rs6905288   | A | 0.60 | 0.011  | 0.002 | 3.75E-09 | 0.018  | 0.008 | 3.30E-02 |
| FI   | rs73013411  | A | 0.12 | -0.018 | 0.003 | 1.86E-08 | -0.028 | 0.011 | 2.20E-02 |
| FI   | rs2108349   | A | 0.69 | -0.012 | 0.002 | 8.92E-09 | -0.011 | 0.008 | 1.40E-01 |
| FI   | rs972283    | A | 0.46 | -0.011 | 0.002 | 3.27E-08 | -0.012 | 0.008 | 8.10E-02 |
| FI   | rs13258890  | T | 0.75 | 0.013  | 0.003 | 3.06E-07 | 0.016  | 0.009 | 9.10E-02 |
| FI   | rs7012814   | A | 0.47 | -0.022 | 0.002 | 9.72E-31 | 0.002  | 0.008 | 8.40E-01 |
| FI   | rs75179845  | T | 0.92 | -0.022 | 0.004 | 6.77E-10 | -0.030 | 0.017 | 6.90E-02 |
| FI   | rs118164457 | T | 0.96 | -0.035 | 0.006 | 1.42E-09 | -0.017 | 0.019 | 4.50E-01 |
| FI   | rs7903146   | T | 0.31 | -0.012 | 0.002 | 3.32E-08 | 0.010  | 0.009 | 2.10E-01 |
| FI   | rs2845885   | T | 0.93 | -0.020 | 0.004 | 1.69E-07 | -0.012 | 0.017 | 5.10E-01 |
| FI   | rs1351394   | T | 0.47 | -0.011 | 0.002 | 6.97E-10 | -0.022 | 0.008 | 6.30E-03 |
| FI   | rs6487237   | A | 0.79 | 0.015  | 0.003 | 3.16E-09 | -0.009 | 0.010 | 3.70E-01 |
| FI   | rs7133378   | A | 0.34 | -0.013 | 0.002 | 2.15E-10 | -0.028 | 0.008 | 1.30E-03 |
| FI   | rs860598    | A | 0.82 | 0.018  | 0.003 | 1.44E-12 | 0.001  | 0.011 | 8.10E-01 |
| FI   | rs12454712  | T | 0.60 | 0.014  | 0.003 | 1.35E-08 | 0.016  | 0.008 | 5.70E-02 |
| FI   | rs731839    | A | 0.66 | -0.012 | 0.002 | 1.91E-10 | -0.009 | 0.008 | 2.60E-01 |
| FI   | rs1206760   | A | 0.52 | -0.011 | 0.002 | 3.75E-09 | -0.008 | 0.008 | 3.50E-01 |
| HDLC | rs1043897   | G | 0.58 | -0.020 | 0.002 | 8.45E-25 | 0.007  | 0.008 | 3.20E-01 |
| HDLC | rs10916239  | T | 0.62 | -0.012 | 0.002 | 1.47E-09 | 0.016  | 0.008 | 5.10E-02 |
| HDLC | rs11118320  | C | 0.44 | 0.015  | 0.002 | 1.21E-14 | -0.013 | 0.008 | 1.20E-01 |
| HDLC | rs113261881 | G | 0.94 | 0.024  | 0.004 | 1.31E-09 | 0.005  | 0.016 | 6.00E-01 |
| HDLC | rs1168114   | A | 0.35 | -0.016 | 0.002 | 6.63E-15 | 0.006  | 0.008 | 6.60E-01 |
| HDLC | rs12045101  | C | 0.76 | 0.015  | 0.002 | 6.66E-11 | 0.004  | 0.009 | 6.10E-01 |
| HDLC | rs12119128  | G | 0.70 | 0.012  | 0.002 | 3.35E-08 | -0.006 | 0.009 | 4.40E-01 |
| HDLC | rs12740374  | G | 0.78 | -0.029 | 0.002 | 2.20E-36 | -0.010 | 0.009 | 2.00E-01 |
| HDLC | rs140584594 | A | 0.27 | -0.031 | 0.002 | 5.51E-48 | -0.039 | 0.009 | 1.20E-05 |
| HDLC | rs141440048 | C | 0.98 | -0.044 | 0.008 | 6.71E-09 | -0.008 | 0.031 | 9.50E-01 |

|      |             |   |      |        |       |           |        |       |          |
|------|-------------|---|------|--------|-------|-----------|--------|-------|----------|
| HDLC | rs1663626   | C | 0.60 | -0.013 | 0.002 | 2.92E-11  | -0.003 | 0.008 | 7.20E-01 |
| HDLC | rs17185038  | C | 0.93 | -0.021 | 0.004 | 2.69E-08  | 0.024  | 0.016 | 1.30E-01 |
| HDLC | rs1771582   | T | 0.44 | -0.013 | 0.002 | 7.08E-11  | -0.001 | 0.008 | 9.20E-01 |
| HDLC | rs185073199 | T | 0.99 | -0.064 | 0.010 | 2.50E-10  | 0.005  | 0.041 | 8.30E-01 |
| HDLC | rs193084249 | A | 0.98 | 0.083  | 0.006 | 3.84E-38  | -0.029 | 0.026 | 2.40E-01 |
| HDLC | rs2281718   | A | 0.39 | -0.060 | 0.002 | 8.57E-205 | 0.014  | 0.008 | 9.00E-02 |
| HDLC | rs2298214   | C | 0.42 | 0.012  | 0.002 | 1.40E-10  | -0.002 | 0.008 | 8.50E-01 |
| HDLC | rs2298632   | C | 0.50 | -0.014 | 0.002 | 1.59E-13  | 0.014  | 0.008 | 2.70E-02 |
| HDLC | rs2642438   | A | 0.30 | -0.028 | 0.002 | 1.92E-40  | -0.052 | 0.008 | 1.70E-09 |
| HDLC | rs267738    | T | 0.78 | -0.021 | 0.002 | 1.16E-20  | -0.018 | 0.009 | 6.50E-02 |
| HDLC | rs3747973   | A | 0.41 | -0.014 | 0.002 | 2.94E-13  | 0.000  | 0.008 | 9.10E-01 |
| HDLC | rs3768321   | G | 0.80 | 0.045  | 0.002 | 1.28E-79  | -0.005 | 0.010 | 6.10E-01 |
| HDLC | rs3903399   | T | 0.79 | 0.013  | 0.002 | 2.89E-08  | 0.002  | 0.009 | 7.60E-01 |
| HDLC | rs4233367   | T | 0.39 | -0.011 | 0.002 | 4.69E-08  | 0.002  | 0.008 | 8.50E-01 |
| HDLC | rs4650994   | G | 0.47 | 0.018  | 0.002 | 2.00E-21  | 0.011  | 0.008 | 2.30E-01 |
| HDLC | rs4654395   | C | 0.48 | 0.012  | 0.002 | 2.16E-10  | -0.011 | 0.008 | 2.00E-01 |
| HDLC | rs4997370   | G | 0.41 | -0.011 | 0.002 | 2.22E-08  | 0.012  | 0.008 | 1.60E-01 |
| HDLC | rs557933    | A | 0.48 | -0.015 | 0.002 | 1.04E-15  | -0.016 | 0.008 | 5.30E-02 |
| HDLC | rs56105022  | G | 0.96 | 0.034  | 0.005 | 3.49E-10  | 0.005  | 0.022 | 7.60E-01 |
| HDLC | rs61805075  | G | 0.67 | 0.026  | 0.002 | 7.22E-37  | -0.001 | 0.008 | 9.00E-01 |
| HDLC | rs6664374   | C | 0.65 | -0.014 | 0.002 | 2.43E-12  | -0.004 | 0.008 | 4.90E-01 |
| HDLC | rs72654647  | G | 0.75 | 0.014  | 0.002 | 3.11E-10  | 0.001  | 0.009 | 9.40E-01 |
| HDLC | rs74328314  | A | 0.93 | -0.023 | 0.004 | 1.28E-09  | -0.029 | 0.015 | 6.10E-02 |
| HDLC | rs75246752  | G | 0.99 | -0.049 | 0.008 | 5.53E-09  | 0.006  | 0.034 | 9.70E-01 |
| HDLC | rs771481    | T | 0.82 | -0.029 | 0.002 | 8.55E-32  | -0.003 | 0.010 | 7.80E-01 |
| HDLC | rs1047891   | C | 0.68 | 0.019  | 0.002 | 2.69E-20  | 0.004  | 0.008 | 7.40E-01 |
| HDLC | rs1083470   | G | 0.38 | -0.012 | 0.002 | 3.80E-09  | 0.005  | 0.008 | 7.40E-01 |
| HDLC | rs11687520  | T | 0.83 | -0.017 | 0.003 | 2.88E-11  | -0.006 | 0.010 | 4.00E-01 |
| HDLC | rs11688682  | G | 0.73 | -0.015 | 0.002 | 2.35E-11  | 0.017  | 0.009 | 3.80E-02 |
| HDLC | rs11883967  | A | 0.34 | -0.013 | 0.002 | 4.44E-10  | 0.004  | 0.008 | 4.50E-01 |
| HDLC | rs12692596  | C | 0.63 | 0.011  | 0.002 | 1.34E-08  | -0.004 | 0.008 | 5.40E-01 |
| HDLC | rs12713007  | C | 0.50 | 0.011  | 0.002 | 2.07E-08  | -0.014 | 0.008 | 9.40E-02 |
| HDLC | rs12986742  | T | 0.52 | 0.011  | 0.002 | 3.85E-08  | -0.011 | 0.008 | 2.30E-01 |
| HDLC | rs12998038  | C | 0.74 | -0.013 | 0.002 | 1.44E-09  | 0.001  | 0.009 | 7.90E-01 |
| HDLC | rs13389219  | C | 0.61 | -0.028 | 0.002 | 8.16E-46  | 0.036  | 0.008 | 1.00E-05 |
| HDLC | rs1446585   | A | 0.76 | -0.017 | 0.002 | 1.14E-14  | 0.003  | 0.009 | 8.00E-01 |
| HDLC | rs17041868  | T | 0.94 | 0.025  | 0.004 | 2.38E-10  | -0.032 | 0.016 | 4.00E-02 |
| HDLC | rs17326656  | G | 0.76 | 0.023  | 0.002 | 8.22E-24  | -0.022 | 0.009 | 1.40E-02 |
| HDLC | rs2362541   | T | 0.49 | 0.011  | 0.002 | 1.19E-08  | -0.010 | 0.008 | 1.50E-01 |
| HDLC | rs2364723   | G | 0.68 | -0.012 | 0.002 | 2.71E-09  | 0.004  | 0.008 | 6.00E-01 |
| HDLC | rs2723065   | A | 0.62 | -0.015 | 0.002 | 2.53E-14  | 0.001  | 0.008 | 9.30E-01 |
| HDLC | rs2943645   | C | 0.35 | 0.043  | 0.002 | 8.60E-106 | -0.018 | 0.008 | 2.00E-02 |
| HDLC | rs35706812  | A | 0.57 | 0.013  | 0.002 | 8.20E-12  | -0.004 | 0.008 | 5.50E-01 |
| HDLC | rs4550673   | A | 0.92 | 0.019  | 0.003 | 2.05E-08  | -0.036 | 0.014 | 3.00E-02 |
| HDLC | rs4599108   | C | 0.51 | -0.014 | 0.002 | 1.23E-12  | -0.005 | 0.008 | 5.80E-01 |
| HDLC | rs56131490  | G | 0.85 | -0.015 | 0.003 | 1.95E-08  | 0.016  | 0.011 | 1.70E-01 |
| HDLC | rs57074291  | C | 0.74 | -0.013 | 0.002 | 1.44E-09  | 0.003  | 0.009 | 7.40E-01 |
| HDLC | rs59104589  | C | 0.64 | -0.015 | 0.002 | 3.59E-14  | 0.021  | 0.008 | 9.30E-03 |
| HDLC | rs6542680   | C | 0.18 | 0.025  | 0.002 | 1.78E-23  | -0.016 | 0.010 | 1.40E-01 |
| HDLC | rs6738438   | C | 0.64 | 0.011  | 0.002 | 1.12E-08  | 0.002  | 0.008 | 9.20E-01 |
| HDLC | rs676210    | G | 0.79 | -0.059 | 0.002 | 3.69E-140 | 0.004  | 0.010 | 6.10E-01 |
| HDLC | rs72926946  | C | 0.70 | 0.021  | 0.002 | 2.35E-23  | -0.003 | 0.008 | 9.10E-01 |
| HDLC | rs7583067   | C | 0.76 | -0.015 | 0.002 | 7.36E-11  | 0.018  | 0.009 | 5.40E-02 |
| HDLC | rs7595075   | C | 0.65 | -0.014 | 0.002 | 5.45E-13  | 0.012  | 0.008 | 2.00E-01 |
| HDLC | rs78058190  | G | 0.95 | 0.078  | 0.005 | 1.58E-57  | -0.024 | 0.020 | 2.70E-01 |
| HDLC | rs78456138  | C | 0.98 | -0.035 | 0.006 | 3.49E-08  | 0.020  | 0.026 | 4.00E-01 |

|      |             |   |      |        |       |           |        |       |          |
|------|-------------|---|------|--------|-------|-----------|--------|-------|----------|
| HDLC | rs907866    | G | 0.55 | 0.018  | 0.002 | 1.56E-21  | 0.011  | 0.008 | 2.40E-01 |
| HDLC | rs9646934   | C | 0.32 | -0.012 | 0.002 | 3.27E-09  | 0.008  | 0.008 | 1.80E-01 |
| HDLC | rs10513801  | T | 0.86 | 0.030  | 0.003 | 8.29E-28  | -0.018 | 0.011 | 6.20E-02 |
| HDLC | rs1086056   | T | 0.16 | 0.017  | 0.003 | 3.61E-10  | -0.017 | 0.011 | 8.20E-02 |
| HDLC | rs11546878  | C | 0.83 | -0.014 | 0.003 | 2.84E-08  | 0.004  | 0.010 | 5.50E-01 |
| HDLC | rs1225053   | T | 0.74 | 0.015  | 0.002 | 4.68E-12  | -0.011 | 0.009 | 2.40E-01 |
| HDLC | rs12485478  | A | 0.97 | 0.052  | 0.006 | 1.10E-18  | -0.041 | 0.024 | 1.20E-01 |
| HDLC | rs13066793  | A | 0.91 | -0.022 | 0.003 | 3.29E-11  | 0.031  | 0.013 | 1.90E-02 |
| HDLC | rs13076933  | T | 0.74 | 0.017  | 0.002 | 2.25E-14  | 0.007  | 0.009 | 4.70E-01 |
| HDLC | rs13097947  | T | 0.35 | -0.016 | 0.002 | 3.67E-15  | 0.018  | 0.008 | 2.90E-02 |
| HDLC | rs13323506  | A | 0.31 | -0.013 | 0.002 | 1.87E-10  | -0.010 | 0.008 | 2.70E-01 |
| HDLC | rs139828053 | T | 0.97 | 0.032  | 0.006 | 1.47E-08  | -0.005 | 0.022 | 9.30E-01 |
| HDLC | rs2159607   | G | 0.19 | 0.024  | 0.002 | 9.11E-23  | 0.002  | 0.010 | 8.20E-01 |
| HDLC | rs2268840   | T | 0.77 | -0.017 | 0.002 | 3.62E-14  | -0.005 | 0.009 | 5.40E-01 |
| HDLC | rs34717889  | T | 0.80 | -0.014 | 0.002 | 3.52E-09  | 0.020  | 0.010 | 3.20E-02 |
| HDLC | rs3732356   | G | 0.07 | 0.030  | 0.004 | 8.70E-15  | 0.029  | 0.016 | 6.40E-02 |
| HDLC | rs4686739   | A | 0.37 | -0.017 | 0.002 | 2.84E-17  | -0.003 | 0.008 | 6.70E-01 |
| HDLC | rs4855582   | C | 0.57 | -0.011 | 0.002 | 7.97E-09  | -0.005 | 0.008 | 4.60E-01 |
| HDLC | rs62271373  | T | 0.94 | 0.041  | 0.004 | 2.22E-23  | -0.046 | 0.017 | 6.40E-03 |
| HDLC | rs6762415   | T | 0.46 | 0.011  | 0.002 | 1.20E-08  | -0.006 | 0.008 | 2.90E-01 |
| HDLC | rs6765484   | C | 0.53 | -0.022 | 0.002 | 6.51E-32  | 0.020  | 0.008 | 7.50E-03 |
| HDLC | rs6790951   | C | 0.52 | 0.012  | 0.002 | 1.64E-09  | 0.009  | 0.008 | 2.70E-01 |
| HDLC | rs6806529   | A | 0.44 | -0.011 | 0.002 | 6.93E-09  | 0.023  | 0.008 | 4.50E-03 |
| HDLC | rs7622114   | C | 0.42 | -0.012 | 0.002 | 2.71E-09  | 0.007  | 0.008 | 4.70E-01 |
| HDLC | rs7650845   | C | 0.19 | 0.014  | 0.002 | 9.75E-09  | -0.005 | 0.010 | 7.40E-01 |
| HDLC | rs78595810  | G | 0.99 | 0.053  | 0.008 | 2.27E-10  | -0.086 | 0.033 | 1.70E-02 |
| HDLC | rs830620    | C | 0.58 | -0.015 | 0.002 | 8.24E-15  | 0.006  | 0.008 | 4.80E-01 |
| HDLC | rs9647335   | A | 0.81 | -0.028 | 0.002 | 2.41E-30  | 0.009  | 0.010 | 3.80E-01 |
| HDLC | rs9877304   | G | 0.74 | 0.014  | 0.002 | 4.03E-10  | 0.001  | 0.009 | 9.50E-01 |
| HDLC | rs1055582   | C | 0.49 | -0.014 | 0.002 | 2.82E-13  | 0.007  | 0.008 | 4.10E-01 |
| HDLC | rs11938781  | T | 0.83 | 0.015  | 0.003 | 6.40E-09  | -0.014 | 0.010 | 1.40E-01 |
| HDLC | rs12510382  | A | 0.54 | -0.017 | 0.002 | 7.06E-18  | 0.009  | 0.008 | 1.90E-01 |
| HDLC | rs12650112  | C | 0.65 | -0.016 | 0.002 | 1.03E-14  | -0.006 | 0.008 | 4.80E-01 |
| HDLC | rs13107325  | C | 0.93 | 0.080  | 0.004 | 2.23E-108 | -0.011 | 0.015 | 4.00E-01 |
| HDLC | rs13111599  | A | 0.26 | -0.013 | 0.002 | 2.63E-09  | 0.005  | 0.009 | 5.40E-01 |
| HDLC | rs13144151  | A | 0.15 | -0.018 | 0.003 | 3.90E-11  | -0.010 | 0.011 | 3.60E-01 |
| HDLC | rs13147189  | T | 0.68 | 0.014  | 0.002 | 2.53E-12  | -0.009 | 0.008 | 3.00E-01 |
| HDLC | rs1349852   | A | 0.52 | -0.011 | 0.002 | 5.75E-09  | -0.005 | 0.008 | 3.70E-01 |
| HDLC | rs1395221   | G | 0.60 | 0.011  | 0.002 | 1.12E-08  | 0.005  | 0.008 | 5.50E-01 |
| HDLC | rs2098918   | C | 0.54 | -0.012 | 0.002 | 6.43E-10  | -0.007 | 0.008 | 3.80E-01 |
| HDLC | rs2175766   | A | 0.46 | -0.011 | 0.002 | 1.80E-08  | 0.008  | 0.008 | 3.30E-01 |
| HDLC | rs2237035   | G | 0.61 | -0.014 | 0.002 | 1.28E-12  | 0.004  | 0.008 | 5.50E-01 |
| HDLC | rs28455602  | A | 0.81 | -0.014 | 0.002 | 1.99E-08  | 0.006  | 0.010 | 5.50E-01 |
| HDLC | rs35777071  | T | 0.35 | -0.016 | 0.002 | 3.48E-15  | -0.005 | 0.008 | 4.50E-01 |
| HDLC | rs3775228   | C | 0.60 | 0.020  | 0.002 | 1.92E-24  | -0.005 | 0.008 | 5.60E-01 |
| HDLC | rs4691379   | C | 0.68 | -0.012 | 0.002 | 6.09E-09  | 0.019  | 0.008 | 1.90E-02 |
| HDLC | rs546436456 | T | 0.97 | 0.032  | 0.006 | 3.65E-08  | -0.036 | 0.023 | 7.40E-02 |
| HDLC | rs62338910  | A | 0.76 | -0.016 | 0.002 | 3.99E-12  | 0.001  | 0.009 | 9.00E-01 |
| HDLC | rs6824451   | G | 0.54 | 0.020  | 0.002 | 9.68E-26  | -0.015 | 0.008 | 4.60E-02 |
| HDLC | rs73243877  | A | 0.83 | 0.025  | 0.003 | 2.21E-23  | -0.017 | 0.010 | 7.60E-02 |
| HDLC | rs7658082   | T | 0.45 | 0.011  | 0.002 | 3.16E-09  | -0.004 | 0.008 | 6.90E-01 |
| HDLC | rs78025076  | C | 0.98 | 0.049  | 0.007 | 3.00E-13  | 0.009  | 0.028 | 5.00E-01 |
| HDLC | rs880674    | T | 0.86 | -0.015 | 0.003 | 4.24E-08  | 0.006  | 0.011 | 5.90E-01 |
| HDLC | rs9884482   | T | 0.63 | 0.013  | 0.002 | 1.74E-10  | 0.013  | 0.008 | 1.30E-01 |
| HDLC | rs1045241   | C | 0.73 | -0.016 | 0.002 | 2.13E-14  | 0.005  | 0.009 | 5.40E-01 |
| HDLC | rs115912456 | A | 0.96 | -0.028 | 0.005 | 4.16E-09  | 0.012  | 0.019 | 6.90E-01 |

|      |             |   |      |        |       |          |        |       |          |
|------|-------------|---|------|--------|-------|----------|--------|-------|----------|
| HDLC | rs116006942 | G | 0.94 | 0.030  | 0.004 | 1.02E-13 | -0.003 | 0.016 | 8.50E-01 |
| HDLC | rs11948445  | A | 0.59 | 0.011  | 0.002 | 1.49E-08 | -0.010 | 0.008 | 1.80E-01 |
| HDLC | rs12516070  | T | 0.48 | -0.012 | 0.002 | 1.01E-10 | 0.004  | 0.008 | 5.80E-01 |
| HDLC | rs138354839 | C | 0.98 | 0.060  | 0.008 | 9.71E-13 | 0.006  | 0.034 | 7.70E-01 |
| HDLC | rs16885512  | C | 0.92 | 0.020  | 0.004 | 1.79E-08 | -0.011 | 0.015 | 5.70E-01 |
| HDLC | rs1862205   | G | 0.60 | -0.011 | 0.002 | 6.52E-09 | -0.004 | 0.008 | 4.30E-01 |
| HDLC | rs2307111   | T | 0.61 | -0.019 | 0.002 | 1.99E-22 | 0.015  | 0.008 | 3.70E-02 |
| HDLC | rs2339234   | G | 0.32 | 0.012  | 0.002 | 6.69E-09 | -0.013 | 0.008 | 1.30E-01 |
| HDLC | rs248653    | T | 0.96 | 0.032  | 0.005 | 3.43E-10 | 0.020  | 0.020 | 2.90E-01 |
| HDLC | rs254024    | G | 0.56 | 0.010  | 0.002 | 4.94E-08 | -0.014 | 0.008 | 4.70E-02 |
| HDLC | rs254559    | C | 0.60 | 0.011  | 0.002 | 3.38E-09 | 0.004  | 0.008 | 6.00E-01 |
| HDLC | rs2910949   | T | 0.65 | -0.013 | 0.002 | 1.98E-11 | 0.001  | 0.008 | 9.90E-01 |
| HDLC | rs2963468   | A | 0.76 | 0.020  | 0.002 | 3.47E-18 | -0.014 | 0.009 | 1.20E-01 |
| HDLC | rs2964007   | A | 0.34 | -0.014 | 0.002 | 7.04E-12 | 0.011  | 0.008 | 1.40E-01 |
| HDLC | rs32578     | G | 0.69 | -0.013 | 0.002 | 1.11E-10 | -0.009 | 0.008 | 3.60E-01 |
| HDLC | rs3733890   | G | 0.71 | 0.014  | 0.002 | 4.10E-11 | 0.002  | 0.009 | 8.80E-01 |
| HDLC | rs3749748   | C | 0.75 | -0.017 | 0.002 | 7.85E-14 | -0.009 | 0.009 | 4.10E-01 |
| HDLC | rs3936511   | A | 0.81 | 0.030  | 0.002 | 3.61E-36 | -0.041 | 0.010 | 3.90E-05 |
| HDLC | rs445841    | G | 0.63 | 0.011  | 0.002 | 4.47E-08 | -0.009 | 0.008 | 2.30E-01 |
| HDLC | rs454968    | T | 0.36 | -0.011 | 0.002 | 4.03E-08 | 0.009  | 0.008 | 3.30E-01 |
| HDLC | rs4976033   | A | 0.60 | 0.012  | 0.002 | 1.02E-09 | -0.012 | 0.008 | 1.60E-01 |
| HDLC | rs6874833   | C | 0.37 | -0.011 | 0.002 | 8.97E-09 | 0.007  | 0.008 | 3.90E-01 |
| HDLC | rs6893139   | G | 0.60 | 0.011  | 0.002 | 2.36E-08 | -0.004 | 0.008 | 7.20E-01 |
| HDLC | rs72801474  | G | 0.91 | -0.021 | 0.003 | 1.13E-10 | 0.040  | 0.013 | 2.70E-03 |
| HDLC | rs7725218   | G | 0.66 | 0.012  | 0.002 | 1.48E-09 | 0.008  | 0.008 | 3.80E-01 |
| HDLC | rs1155347   | T | 0.78 | -0.014 | 0.002 | 5.87E-09 | 0.003  | 0.010 | 6.20E-01 |
| HDLC | rs1240820   | G | 0.71 | -0.013 | 0.002 | 3.50E-10 | 0.012  | 0.009 | 2.50E-01 |
| HDLC | rs13195251  | T | 0.29 | 0.012  | 0.002 | 2.03E-08 | -0.005 | 0.009 | 5.90E-01 |
| HDLC | rs2263329   | T | 0.64 | 0.027  | 0.002 | 7.47E-43 | -0.006 | 0.008 | 3.20E-01 |
| HDLC | rs2750411   | T | 0.51 | 0.011  | 0.002 | 1.37E-08 | -0.002 | 0.008 | 6.60E-01 |
| HDLC | rs2781668   | C | 0.83 | 0.017  | 0.003 | 7.61E-11 | -0.005 | 0.010 | 7.70E-01 |
| HDLC | rs3763236   | T | 0.49 | -0.015 | 0.002 | 8.16E-15 | -0.009 | 0.008 | 1.80E-01 |
| HDLC | rs4947121   | T | 0.23 | 0.014  | 0.002 | 4.77E-10 | -0.001 | 0.009 | 7.70E-01 |
| HDLC | rs502627    | A | 0.90 | -0.018 | 0.003 | 3.50E-08 | 0.012  | 0.013 | 3.20E-01 |
| HDLC | rs571848809 | G | 0.89 | 0.057  | 0.003 | 6.73E-75 | -0.014 | 0.013 | 2.70E-01 |
| HDLC | rs62428831  | T | 0.86 | -0.018 | 0.003 | 1.10E-10 | 0.023  | 0.011 | 1.20E-02 |
| HDLC | rs632057    | T | 0.37 | -0.020 | 0.002 | 1.64E-23 | 0.010  | 0.008 | 1.50E-01 |
| HDLC | rs6457807   | T | 0.83 | -0.019 | 0.003 | 1.33E-13 | 0.016  | 0.010 | 1.60E-01 |
| HDLC | rs6902116   | A | 0.68 | 0.027  | 0.002 | 1.93E-40 | 0.008  | 0.008 | 2.30E-01 |
| HDLC | rs6924387   | A | 0.59 | 0.014  | 0.002 | 2.01E-12 | -0.006 | 0.008 | 4.30E-01 |
| HDLC | rs6934962   | C | 0.60 | -0.016 | 0.002 | 5.56E-17 | 0.016  | 0.008 | 6.70E-02 |
| HDLC | rs6940493   | A | 0.31 | -0.012 | 0.002 | 5.02E-09 | 0.000  | 0.008 | 7.40E-01 |
| HDLC | rs72959041  | G | 0.95 | 0.047  | 0.004 | 2.39E-26 | -0.038 | 0.018 | 2.30E-02 |
| HDLC | rs74419430  | T | 0.58 | -0.016 | 0.002 | 4.12E-17 | 0.008  | 0.008 | 5.20E-01 |
| HDLC | rs75479205  | A | 0.81 | -0.014 | 0.002 | 1.04E-08 | 0.013  | 0.010 | 2.60E-01 |
| HDLC | rs7750688   | C | 0.24 | -0.021 | 0.002 | 4.25E-22 | -0.010 | 0.009 | 3.70E-01 |
| HDLC | rs7757193   | G | 0.63 | 0.019  | 0.002 | 7.62E-22 | 0.015  | 0.008 | 6.70E-02 |
| HDLC | rs7769059   | G | 0.72 | 0.015  | 0.002 | 1.15E-12 | 0.003  | 0.009 | 7.90E-01 |
| HDLC | rs9274346   | C | 0.61 | -0.015 | 0.002 | 2.72E-14 | -0.017 | 0.008 | 3.60E-02 |
| HDLC | rs9347737   | A | 0.57 | 0.014  | 0.002 | 3.49E-12 | -0.007 | 0.008 | 5.70E-01 |
| HDLC | rs968050    | C | 0.52 | -0.014 | 0.002 | 1.28E-12 | 0.027  | 0.008 | 2.80E-04 |
| HDLC | rs998584    | C | 0.52 | 0.034  | 0.002 | 2.92E-71 | -0.018 | 0.008 | 2.20E-02 |
| HDLC | rs10233430  | T | 0.57 | 0.020  | 0.002 | 2.49E-26 | 0.002  | 0.008 | 7.00E-01 |
| HDLC | rs10252234  | C | 0.76 | -0.016 | 0.002 | 2.39E-12 | 0.004  | 0.009 | 6.20E-01 |
| HDLC | rs10950390  | C | 0.79 | 0.015  | 0.002 | 1.28E-10 | -0.008 | 0.010 | 4.60E-01 |
| HDLC | rs12705595  | G | 0.63 | -0.011 | 0.002 | 2.39E-08 | 0.008  | 0.008 | 3.10E-01 |



|      |             |   |      |        |       |           |        |       |          |
|------|-------------|---|------|--------|-------|-----------|--------|-------|----------|
| HDLC | rs13235365  | C | 0.73 | -0.026 | 0.002 | 2.92E-33  | -0.004 | 0.009 | 5.00E-01 |
| HDLC | rs144567740 | T | 0.81 | -0.014 | 0.003 | 2.46E-08  | 0.014  | 0.010 | 1.70E-01 |
| HDLC | rs150300171 | A | 0.95 | 0.029  | 0.005 | 9.21E-11  | -0.034 | 0.019 | 8.70E-02 |
| HDLC | rs1534696   | C | 0.46 | -0.017 | 0.002 | 2.65E-18  | 0.004  | 0.008 | 5.60E-01 |
| HDLC | rs17138358  | G | 0.60 | 0.027  | 0.002 | 4.22E-44  | 0.009  | 0.008 | 3.30E-01 |
| HDLC | rs183906992 | T | 0.96 | -0.029 | 0.005 | 5.43E-10  | -0.036 | 0.019 | 9.50E-02 |
| HDLC | rs201441    | T | 0.42 | 0.011  | 0.002 | 1.11E-08  | 0.003  | 0.008 | 7.90E-01 |
| HDLC | rs2534596   | A | 0.62 | -0.011 | 0.002 | 8.83E-09  | 0.012  | 0.008 | 1.10E-01 |
| HDLC | rs34940374  | G | 0.82 | 0.017  | 0.002 | 5.78E-12  | -0.014 | 0.010 | 1.90E-01 |
| HDLC | rs35493868  | C | 0.80 | -0.037 | 0.002 | 2.25E-55  | -0.001 | 0.010 | 8.90E-01 |
| HDLC | rs35580606  | A | 0.48 | 0.011  | 0.002 | 1.18E-08  | -0.006 | 0.008 | 3.50E-01 |
| HDLC | rs38166     | T | 0.25 | -0.013 | 0.002 | 1.41E-08  | 0.015  | 0.009 | 5.70E-02 |
| HDLC | rs42125     | A | 0.98 | 0.040  | 0.007 | 1.29E-08  | 0.010  | 0.029 | 9.20E-01 |
| HDLC | rs4410790   | T | 0.37 | 0.011  | 0.002 | 1.96E-08  | -0.005 | 0.008 | 3.50E-01 |
| HDLC | rs4731701   | C | 0.51 | -0.030 | 0.002 | 1.04E-54  | 0.012  | 0.008 | 7.50E-02 |
| HDLC | rs55935382  | C | 0.67 | -0.018 | 0.002 | 5.46E-18  | 0.003  | 0.008 | 5.90E-01 |
| HDLC | rs62492368  | G | 0.69 | 0.017  | 0.002 | 1.51E-16  | -0.007 | 0.009 | 3.80E-01 |
| HDLC | rs66763009  | T | 0.56 | 0.016  | 0.002 | 9.69E-17  | -0.002 | 0.008 | 9.50E-01 |
| HDLC | rs73151974  | C | 0.86 | 0.016  | 0.003 | 3.81E-09  | -0.011 | 0.011 | 2.70E-01 |
| HDLC | rs77605964  | G | 0.77 | -0.017 | 0.002 | 7.51E-14  | -0.021 | 0.009 | 2.10E-02 |
| HDLC | rs10504477  | T | 0.59 | 0.015  | 0.002 | 6.42E-15  | 0.000  | 0.008 | 9.10E-01 |
| HDLC | rs10955991  | T | 0.32 | 0.020  | 0.002 | 2.83E-22  | -0.001 | 0.008 | 9.30E-01 |
| HDLC | rs13263821  | G | 0.81 | 0.017  | 0.002 | 1.21E-11  | -0.023 | 0.010 | 3.60E-02 |
| HDLC | rs13269725  | A | 0.92 | 0.026  | 0.004 | 2.12E-13  | -0.025 | 0.014 | 7.50E-02 |
| HDLC | rs140064750 | T | 0.98 | 0.044  | 0.006 | 4.10E-12  | -0.002 | 0.026 | 9.10E-01 |
| HDLC | rs142288236 | C | 0.99 | 0.078  | 0.008 | 1.95E-22  | 0.033  | 0.033 | 4.10E-01 |
| HDLC | rs1431659   | A | 0.27 | -0.013 | 0.002 | 2.52E-09  | 0.001  | 0.009 | 7.80E-01 |
| HDLC | rs17740942  | T | 0.88 | -0.020 | 0.003 | 4.74E-11  | 0.006  | 0.013 | 7.90E-01 |
| HDLC | rs2247355   | C | 0.82 | -0.021 | 0.002 | 5.82E-17  | 0.017  | 0.010 | 9.10E-02 |
| HDLC | rs308       | T | 0.98 | -0.126 | 0.007 | 1.41E-79  | -0.024 | 0.028 | 5.30E-01 |
| HDLC | rs330042    | G | 0.73 | -0.015 | 0.002 | 1.34E-11  | 0.001  | 0.009 | 8.50E-01 |
| HDLC | rs343       | C | 0.92 | -0.134 | 0.003 | 0.00E+00  | 0.034  | 0.014 | 2.80E-02 |
| HDLC | rs4871603   | C | 0.35 | -0.036 | 0.002 | 3.81E-73  | 0.035  | 0.008 | 9.30E-06 |
| HDLC | rs4871624   | T | 0.71 | 0.020  | 0.002 | 4.09E-22  | -0.019 | 0.009 | 2.50E-02 |
| HDLC | rs4875043   | A | 0.78 | 0.015  | 0.002 | 1.24E-10  | 0.002  | 0.009 | 7.90E-01 |
| HDLC | rs61435086  | T | 0.99 | -0.089 | 0.009 | 4.37E-25  | 0.029  | 0.035 | 4.50E-01 |
| HDLC | rs61596977  | C | 0.86 | 0.016  | 0.003 | 3.51E-09  | -0.023 | 0.011 | 3.30E-02 |
| HDLC | rs62486442  | G | 0.67 | 0.014  | 0.002 | 3.24E-12  | 0.002  | 0.008 | 8.00E-01 |
| HDLC | rs62491176  | T | 0.86 | -0.019 | 0.003 | 1.15E-12  | -0.003 | 0.011 | 7.10E-01 |
| HDLC | rs6469605   | C | 0.43 | -0.032 | 0.002 | 2.59E-61  | 0.017  | 0.008 | 3.10E-02 |
| HDLC | rs67344323  | T | 0.74 | 0.015  | 0.002 | 2.08E-11  | -0.020 | 0.009 | 2.70E-02 |
| HDLC | rs67934334  | G | 0.37 | -0.011 | 0.002 | 3.85E-08  | 0.004  | 0.008 | 5.50E-01 |
| HDLC | rs6987377   | A | 0.42 | -0.011 | 0.002 | 1.05E-08  | 0.001  | 0.008 | 8.20E-01 |
| HDLC | rs72647336  | G | 0.94 | 0.044  | 0.004 | 2.07E-23  | -0.018 | 0.018 | 3.10E-01 |
| HDLC | rs75032664  | C | 0.99 | 0.055  | 0.009 | 1.51E-09  | 0.006  | 0.036 | 9.40E-01 |
| HDLC | rs75609851  | G | 0.99 | -0.170 | 0.010 | 1.67E-69  | -0.009 | 0.040 | 7.40E-01 |
| HDLC | rs75662196  | G | 0.97 | -0.068 | 0.006 | 8.49E-31  | -0.005 | 0.024 | 8.70E-01 |
| HDLC | rs7817574   | T | 0.81 | -0.033 | 0.002 | 4.37E-42  | 0.002  | 0.010 | 9.50E-01 |
| HDLC | rs7826177   | T | 0.36 | -0.011 | 0.002 | 1.20E-08  | 0.014  | 0.008 | 1.20E-01 |
| HDLC | rs79153732  | C | 0.98 | 0.094  | 0.007 | 5.34E-38  | 0.080  | 0.030 | 4.00E-03 |
| HDLC | rs80005209  | T | 0.97 | 0.144  | 0.006 | 4.95E-144 | -0.028 | 0.023 | 2.20E-01 |
| HDLC | rs9657541   | C | 0.80 | 0.017  | 0.002 | 1.88E-13  | 0.011  | 0.010 | 2.00E-01 |
| HDLC | rs9987289   | A | 0.09 | -0.087 | 0.003 | 6.57E-155 | -0.023 | 0.014 | 9.50E-02 |
| HDLC | rs117435644 | G | 0.76 | -0.012 | 0.002 | 3.07E-08  | -0.001 | 0.009 | 9.30E-01 |
| HDLC | rs11789603  | C | 0.89 | -0.069 | 0.003 | 6.66E-110 | 0.010  | 0.012 | 3.60E-01 |
| HDLC | rs12686780  | C | 0.83 | 0.016  | 0.003 | 1.24E-10  | -0.007 | 0.010 | 4.70E-01 |

|      |             |   |      |        |       |           |        |       |          |
|------|-------------|---|------|--------|-------|-----------|--------|-------|----------|
| HDLC | rs13300004  | A | 0.99 | 0.049  | 0.009 | 1.22E-08  | -0.006 | 0.036 | 8.60E-01 |
| HDLC | rs1411432   | A | 0.81 | 0.014  | 0.002 | 1.71E-08  | -0.007 | 0.010 | 4.90E-01 |
| HDLC | rs1412234   | T | 0.67 | 0.012  | 0.002 | 3.49E-09  | -0.004 | 0.008 | 7.20E-01 |
| HDLC | rs1567353   | C | 0.69 | 0.011  | 0.002 | 4.52E-08  | -0.004 | 0.008 | 7.10E-01 |
| HDLC | rs2066714   | T | 0.87 | -0.047 | 0.003 | 4.20E-60  | 0.009  | 0.012 | 6.30E-01 |
| HDLC | rs2297402   | C | 0.98 | 0.068  | 0.007 | 6.88E-26  | 0.020  | 0.027 | 5.30E-01 |
| HDLC | rs2417125   | A | 0.72 | 0.013  | 0.002 | 4.32E-10  | -0.009 | 0.009 | 3.50E-01 |
| HDLC | rs2520096   | A | 0.73 | -0.015 | 0.002 | 7.21E-12  | -0.005 | 0.009 | 5.30E-01 |
| HDLC | rs2740488   | A | 0.73 | 0.069  | 0.002 | 3.99E-222 | -0.009 | 0.009 | 3.40E-01 |
| HDLC | rs28712486  | C | 0.77 | -0.015 | 0.002 | 5.29E-11  | 0.014  | 0.009 | 1.20E-01 |
| HDLC | rs532436    | G | 0.82 | -0.023 | 0.002 | 3.03E-21  | -0.022 | 0.010 | 2.20E-02 |
| HDLC | rs62565259  | C | 0.83 | -0.016 | 0.003 | 6.13E-10  | 0.011  | 0.010 | 2.50E-01 |
| HDLC | rs686030    | C | 0.14 | -0.050 | 0.003 | 9.76E-74  | -0.010 | 0.011 | 4.10E-01 |
| HDLC | rs7036107   | A | 0.49 | 0.012  | 0.002 | 2.73E-10  | -0.011 | 0.008 | 9.40E-02 |
| HDLC | rs7039168   | A | 0.33 | -0.012 | 0.002 | 1.59E-08  | 0.001  | 0.008 | 9.00E-01 |
| HDLC | rs74500135  | T | 0.99 | -0.067 | 0.010 | 2.27E-11  | 0.029  | 0.040 | 4.20E-01 |
| HDLC | rs75572195  | G | 0.91 | -0.023 | 0.003 | 4.67E-12  | 0.016  | 0.013 | 2.70E-01 |
| HDLC | rs76530346  | G | 0.91 | 0.019  | 0.003 | 3.78E-09  | 0.009  | 0.013 | 5.20E-01 |
| HDLC | rs10761737  | T | 0.58 | -0.014 | 0.002 | 4.82E-13  | -0.002 | 0.008 | 9.40E-01 |
| HDLC | rs10786114  | C | 0.13 | -0.024 | 0.003 | 1.55E-16  | 0.007  | 0.012 | 6.70E-01 |
| HDLC | rs10826337  | G | 0.59 | 0.011  | 0.002 | 5.81E-09  | -0.003 | 0.008 | 6.20E-01 |
| HDLC | rs10901802  | G | 0.48 | -0.011 | 0.002 | 1.64E-08  | -0.006 | 0.008 | 4.50E-01 |
| HDLC | rs11000468  | C | 0.74 | -0.013 | 0.002 | 1.49E-08  | -0.005 | 0.009 | 6.10E-01 |
| HDLC | rs11009262  | G | 0.94 | 0.023  | 0.004 | 1.08E-08  | -0.025 | 0.017 | 1.40E-01 |
| HDLC | rs11202156  | G | 0.73 | 0.012  | 0.002 | 2.57E-08  | -0.004 | 0.009 | 7.00E-01 |
| HDLC | rs11239536  | T | 0.76 | -0.029 | 0.002 | 5.30E-38  | 0.000  | 0.009 | 9.50E-01 |
| HDLC | rs11254464  | T | 0.58 | -0.013 | 0.002 | 5.54E-11  | -0.015 | 0.008 | 5.90E-02 |
| HDLC | rs12411732  | G | 0.85 | 0.031  | 0.003 | 7.59E-29  | 0.032  | 0.011 | 3.20E-03 |
| HDLC | rs12411959  | A | 0.78 | 0.016  | 0.002 | 1.50E-11  | -0.013 | 0.009 | 1.70E-01 |
| HDLC | rs1970811   | T | 0.54 | 0.012  | 0.002 | 1.49E-09  | -0.001 | 0.008 | 9.20E-01 |
| HDLC | rs2068888   | G | 0.55 | -0.019 | 0.002 | 1.21E-23  | 0.013  | 0.008 | 8.30E-02 |
| HDLC | rs2456722   | A | 0.40 | -0.011 | 0.002 | 1.46E-08  | 0.004  | 0.008 | 6.90E-01 |
| HDLC | rs2792751   | T | 0.27 | 0.036  | 0.002 | 3.29E-64  | 0.053  | 0.009 | 2.10E-09 |
| HDLC | rs2804894   | G | 0.27 | -0.017 | 0.002 | 2.20E-15  | 0.004  | 0.009 | 6.60E-01 |
| HDLC | rs2862954   | T | 0.50 | -0.015 | 0.002 | 9.68E-15  | 0.019  | 0.008 | 1.80E-02 |
| HDLC | rs577525    | T | 0.44 | 0.014  | 0.002 | 2.57E-13  | -0.011 | 0.008 | 8.10E-02 |
| HDLC | rs703966    | G | 0.58 | -0.016 | 0.002 | 5.43E-16  | 0.004  | 0.008 | 6.70E-01 |
| HDLC | rs72805692  | A | 0.88 | 0.018  | 0.003 | 9.41E-10  | -0.020 | 0.012 | 1.50E-01 |
| HDLC | rs72823020  | T | 0.87 | -0.029 | 0.003 | 4.49E-25  | -0.010 | 0.011 | 3.70E-01 |
| HDLC | rs7903537   | C | 0.48 | 0.011  | 0.002 | 5.77E-09  | -0.006 | 0.008 | 4.10E-01 |
| HDLC | rs1052373   | C | 0.68 | -0.045 | 0.002 | 1.41E-106 | 0.008  | 0.008 | 3.30E-01 |
| HDLC | rs10750766  | C | 0.29 | 0.019  | 0.002 | 6.99E-19  | -0.009 | 0.009 | 3.00E-01 |
| HDLC | rs10896581  | G | 0.88 | 0.018  | 0.003 | 5.41E-10  | -0.022 | 0.012 | 5.70E-02 |
| HDLC | rs11021232  | T | 0.82 | 0.017  | 0.002 | 1.54E-11  | -0.014 | 0.010 | 1.60E-01 |
| HDLC | rs112192770 | C | 0.95 | -0.029 | 0.005 | 3.34E-10  | 0.007  | 0.018 | 6.70E-01 |
| HDLC | rs11231138  | C | 0.63 | 0.015  | 0.002 | 3.03E-14  | -0.006 | 0.008 | 4.10E-01 |
| HDLC | rs112771035 | C | 0.93 | 0.032  | 0.004 | 8.33E-18  | 0.012  | 0.015 | 4.00E-01 |
| HDLC | rs11601507  | C | 0.93 | 0.025  | 0.004 | 9.16E-12  | -0.009 | 0.015 | 4.10E-01 |
| HDLC | rs11605837  | G | 0.69 | 0.018  | 0.002 | 1.13E-17  | 0.001  | 0.008 | 8.80E-01 |
| HDLC | rs116978226 | C | 0.97 | -0.068 | 0.005 | 2.23E-36  | 0.012  | 0.022 | 5.60E-01 |
| HDLC | rs12146566  | A | 0.80 | 0.014  | 0.002 | 1.25E-08  | 0.006  | 0.010 | 5.50E-01 |
| HDLC | rs12803463  | G | 0.92 | -0.024 | 0.003 | 1.10E-11  | -0.002 | 0.014 | 9.20E-01 |
| HDLC | rs140201358 | C | 0.99 | 0.058  | 0.008 | 1.46E-12  | -0.154 | 0.032 | 2.70E-06 |
| HDLC | rs141469619 | A | 0.99 | 0.204  | 0.010 | 4.63E-89  | -0.076 | 0.041 | 7.10E-02 |
| HDLC | rs143474489 | T | 0.98 | -0.048 | 0.007 | 1.18E-13  | 0.037  | 0.026 | 1.50E-01 |
| HDLC | rs16928809  | G | 0.91 | 0.026  | 0.003 | 1.40E-15  | -0.010 | 0.013 | 4.00E-01 |

|      |             |   |      |        |       |           |        |       |          |
|------|-------------|---|------|--------|-------|-----------|--------|-------|----------|
| HDLC | rs17309930  | C | 0.79 | 0.022  | 0.002 | 1.32E-20  | -0.019 | 0.010 | 5.30E-02 |
| HDLC | rs174566    | A | 0.65 | 0.056  | 0.002 | 9.53E-175 | 0.000  | 0.008 | 1.00E+00 |
| HDLC | rs17566828  | G | 0.96 | -0.030 | 0.005 | 4.32E-10  | 0.004  | 0.019 | 1.00E+00 |
| HDLC | rs2155220   | C | 0.56 | 0.011  | 0.002 | 3.23E-08  | -0.016 | 0.008 | 3.30E-02 |
| HDLC | rs2218793   | C | 0.72 | 0.015  | 0.002 | 1.11E-12  | 0.006  | 0.009 | 4.80E-01 |
| HDLC | rs28876383  | C | 0.98 | 0.052  | 0.007 | 4.07E-13  | 0.046  | 0.029 | 1.00E-01 |
| HDLC | rs4356188   | C | 0.30 | 0.016  | 0.002 | 3.82E-14  | 0.000  | 0.008 | 9.50E-01 |
| HDLC | rs4755720   | C | 0.39 | -0.011 | 0.002 | 1.41E-08  | 0.020  | 0.008 | 5.10E-03 |
| HDLC | rs4930352   | G | 0.51 | -0.016 | 0.002 | 8.71E-17  | 0.011  | 0.008 | 1.70E-01 |
| HDLC | rs514924    | A | 0.10 | 0.018  | 0.003 | 2.05E-08  | 0.019  | 0.013 | 1.90E-01 |
| HDLC | rs550916783 | G | 0.99 | 0.053  | 0.010 | 4.52E-08  | -0.034 | 0.039 | 3.50E-01 |
| HDLC | rs559355    | A | 0.84 | 0.035  | 0.003 | 8.14E-41  | 0.032  | 0.011 | 2.80E-03 |
| HDLC | rs56271783  | G | 0.95 | 0.056  | 0.005 | 2.92E-34  | -0.020 | 0.019 | 3.40E-01 |
| HDLC | rs567056    | G | 0.62 | 0.011  | 0.002 | 7.01E-09  | -0.018 | 0.008 | 2.70E-02 |
| HDLC | rs58473820  | C | 0.62 | -0.026 | 0.002 | 7.45E-39  | -0.015 | 0.008 | 6.10E-02 |
| HDLC | rs61884030  | T | 0.86 | -0.018 | 0.003 | 1.27E-10  | 0.013  | 0.011 | 2.60E-01 |
| HDLC | rs6590207   | A | 0.71 | 0.015  | 0.002 | 8.99E-12  | 0.000  | 0.009 | 8.10E-01 |
| HDLC | rs73457437  | G | 0.97 | 0.035  | 0.005 | 8.05E-11  | 0.006  | 0.022 | 7.70E-01 |
| HDLC | rs77916918  | G | 0.97 | -0.032 | 0.005 | 7.42E-10  | 0.000  | 0.021 | 9.30E-01 |
| HDLC | rs7925100   | G | 0.60 | 0.018  | 0.002 | 2.08E-21  | -0.007 | 0.008 | 2.80E-01 |
| HDLC | rs79634051  | G | 0.97 | -0.039 | 0.006 | 1.08E-11  | 0.011  | 0.023 | 6.10E-01 |
| HDLC | rs964184    | G | 0.13 | -0.105 | 0.003 | 0.00E+00  | 0.007  | 0.011 | 5.10E-01 |
| HDLC | rs1012306   | C | 0.44 | -0.011 | 0.002 | 2.87E-08  | -0.009 | 0.008 | 2.00E-01 |
| HDLC | rs1054852   | A | 0.62 | -0.035 | 0.002 | 7.97E-65  | 0.024  | 0.008 | 5.60E-03 |
| HDLC | rs10774439  | G | 0.19 | -0.021 | 0.002 | 1.41E-16  | 0.007  | 0.010 | 5.00E-01 |
| HDLC | rs10774579  | T | 0.52 | 0.016  | 0.002 | 1.61E-17  | 0.019  | 0.008 | 1.20E-02 |
| HDLC | rs10846690  | T | 0.15 | -0.021 | 0.003 | 1.31E-15  | 0.011  | 0.011 | 3.30E-01 |
| HDLC | rs10879184  | C | 0.50 | 0.011  | 0.002 | 1.47E-08  | 0.004  | 0.008 | 6.30E-01 |
| HDLC | rs11043221  | A | 0.70 | -0.013 | 0.002 | 4.30E-10  | 0.003  | 0.009 | 7.40E-01 |
| HDLC | rs11045171  | A | 0.80 | -0.028 | 0.002 | 5.04E-32  | 0.010  | 0.010 | 2.60E-01 |
| HDLC | rs11170516  | G | 0.85 | 0.019  | 0.003 | 1.78E-12  | 0.014  | 0.011 | 2.40E-01 |
| HDLC | rs113740515 | G | 0.79 | -0.038 | 0.002 | 1.04E-58  | 0.010  | 0.010 | 3.50E-01 |
| HDLC | rs118128493 | C | 0.95 | 0.025  | 0.005 | 5.05E-08  | -0.004 | 0.018 | 9.30E-01 |
| HDLC | rs1252425   | C | 0.34 | -0.012 | 0.002 | 6.70E-10  | 0.015  | 0.008 | 7.20E-02 |
| HDLC | rs12814794  | G | 0.25 | -0.015 | 0.002 | 1.74E-11  | 0.010  | 0.009 | 1.90E-01 |
| HDLC | rs2204886   | T | 0.48 | 0.013  | 0.002 | 2.24E-11  | -0.009 | 0.008 | 2.40E-01 |
| HDLC | rs2302367   | T | 0.51 | 0.011  | 0.002 | 2.73E-08  | -0.005 | 0.008 | 4.10E-01 |
| HDLC | rs2645979   | G | 0.64 | -0.011 | 0.002 | 8.49E-09  | 0.019  | 0.008 | 2.30E-02 |
| HDLC | rs3184504   | T | 0.48 | -0.027 | 0.002 | 3.48E-44  | 0.003  | 0.008 | 8.40E-01 |
| HDLC | rs4078216   | G | 0.76 | -0.014 | 0.002 | 3.55E-10  | 0.002  | 0.009 | 8.30E-01 |
| HDLC | rs58298943  | C | 0.92 | -0.020 | 0.003 | 3.89E-09  | 0.021  | 0.014 | 1.40E-01 |
| HDLC | rs61352607  | G | 0.76 | -0.031 | 0.002 | 6.36E-43  | 0.006  | 0.009 | 4.90E-01 |
| HDLC | rs61926301  | G | 0.60 | -0.012 | 0.002 | 2.44E-10  | 0.011  | 0.008 | 1.60E-01 |
| HDLC | rs7136506   | T | 0.78 | 0.036  | 0.002 | 1.84E-53  | -0.009 | 0.010 | 3.00E-01 |
| HDLC | rs7308864   | A | 0.48 | -0.024 | 0.002 | 1.08E-35  | -0.004 | 0.008 | 7.40E-01 |
| HDLC | rs7316878   | T | 0.57 | -0.012 | 0.002 | 1.11E-08  | 0.004  | 0.008 | 6.20E-01 |
| HDLC | rs7488780   | G | 0.80 | -0.015 | 0.002 | 8.64E-10  | 0.015  | 0.010 | 7.40E-02 |
| HDLC | rs838777    | C | 0.86 | -0.018 | 0.003 | 3.88E-11  | -0.002 | 0.011 | 7.50E-01 |
| HDLC | rs921919    | G | 0.33 | 0.042  | 0.002 | 2.99E-90  | -0.009 | 0.008 | 2.90E-01 |
| HDLC | rs117230571 | A | 0.92 | 0.027  | 0.004 | 1.97E-13  | 0.012  | 0.015 | 4.10E-01 |
| HDLC | rs183078    | A | 0.60 | -0.012 | 0.002 | 1.96E-10  | -0.009 | 0.008 | 3.30E-01 |
| HDLC | rs374039502 | T | 0.98 | 0.047  | 0.007 | 1.81E-11  | 0.065  | 0.030 | 3.60E-02 |
| HDLC | rs549058    | G | 0.88 | -0.017 | 0.003 | 5.15E-09  | 0.009  | 0.012 | 4.30E-01 |
| HDLC | rs76428106  | T | 0.99 | 0.062  | 0.009 | 1.73E-12  | -0.003 | 0.035 | 8.50E-01 |
| HDLC | rs9526023   | G | 0.97 | -0.033 | 0.006 | 4.04E-09  | 0.034  | 0.023 | 1.00E-01 |
| HDLC | rs9604045   | G | 0.75 | -0.018 | 0.002 | 1.76E-14  | 0.006  | 0.009 | 4.20E-01 |

|      |             |   |      |        |       |           |        |       |          |
|------|-------------|---|------|--------|-------|-----------|--------|-------|----------|
| HDLC | rs11622947  | C | 0.46 | 0.011  | 0.002 | 3.43E-08  | 0.004  | 0.008 | 5.70E-01 |
| HDLC | rs13379043  | T | 0.72 | -0.020 | 0.002 | 6.31E-20  | 0.032  | 0.009 | 3.50E-04 |
| HDLC | rs17124112  | C | 0.92 | 0.021  | 0.004 | 4.11E-09  | 0.002  | 0.014 | 9.70E-01 |
| HDLC | rs1760940   | A | 0.75 | -0.012 | 0.002 | 4.22E-08  | -0.003 | 0.009 | 6.00E-01 |
| HDLC | rs1955512   | G | 0.42 | -0.011 | 0.002 | 2.34E-08  | 0.004  | 0.008 | 5.90E-01 |
| HDLC | rs2498786   | C | 0.38 | 0.025  | 0.002 | 4.45E-38  | 0.003  | 0.008 | 6.60E-01 |
| HDLC | rs35828909  | A | 0.45 | 0.011  | 0.002 | 1.46E-08  | 0.004  | 0.008 | 7.80E-01 |
| HDLC | rs367677    | A | 0.76 | -0.017 | 0.002 | 1.03E-13  | 0.012  | 0.009 | 1.90E-01 |
| HDLC | rs3825669   | A | 0.20 | -0.014 | 0.002 | 4.65E-09  | -0.003 | 0.010 | 8.70E-01 |
| HDLC | rs61993685  | T | 0.92 | -0.020 | 0.004 | 2.98E-08  | 0.020  | 0.014 | 1.50E-01 |
| HDLC | rs7158166   | T | 0.41 | -0.014 | 0.002 | 5.68E-13  | 0.002  | 0.008 | 6.70E-01 |
| HDLC | rs72729582  | A | 0.93 | -0.025 | 0.004 | 1.88E-11  | 0.012  | 0.015 | 4.80E-01 |
| HDLC | rs8014289   | A | 0.44 | -0.015 | 0.002 | 5.76E-15  | 0.005  | 0.008 | 5.60E-01 |
| HDLC | rs9646167   | C | 0.48 | 0.014  | 0.002 | 3.35E-13  | -0.002 | 0.008 | 7.90E-01 |
| HDLC | rs10162642  | G | 0.79 | 0.048  | 0.002 | 2.26E-93  | -0.008 | 0.010 | 4.30E-01 |
| HDLC | rs10438354  | C | 0.65 | -0.012 | 0.002 | 4.67E-09  | 0.012  | 0.008 | 2.10E-01 |
| HDLC | rs11631178  | T | 0.90 | -0.021 | 0.003 | 1.55E-11  | 0.013  | 0.013 | 2.40E-01 |
| HDLC | rs147525635 | G | 0.44 | 0.013  | 0.002 | 3.64E-12  | -0.009 | 0.008 | 1.80E-01 |
| HDLC | rs150844304 | A | 0.97 | 0.090  | 0.006 | 1.99E-51  | -0.027 | 0.025 | 2.80E-01 |
| HDLC | rs1800588   | C | 0.78 | -0.118 | 0.002 | 0.00E+00  | 0.009  | 0.009 | 3.40E-01 |
| HDLC | rs1818917   | C | 0.49 | -0.011 | 0.002 | 2.33E-09  | 0.007  | 0.008 | 2.90E-01 |
| HDLC | rs200540247 | A | 0.29 | -0.013 | 0.002 | 3.31E-10  | -0.003 | 0.009 | 7.40E-01 |
| HDLC | rs2245477   | C | 0.63 | 0.011  | 0.002 | 8.07E-09  | -0.011 | 0.008 | 1.70E-01 |
| HDLC | rs2414178   | T | 0.77 | -0.013 | 0.002 | 2.48E-08  | 0.017  | 0.009 | 4.80E-02 |
| HDLC | rs2663924   | T | 0.25 | -0.012 | 0.002 | 2.92E-08  | -0.001 | 0.009 | 9.40E-01 |
| HDLC | rs28362901  | C | 0.91 | 0.024  | 0.003 | 1.03E-12  | 0.008  | 0.014 | 6.60E-01 |
| HDLC | rs28510484  | G | 0.83 | 0.015  | 0.003 | 1.26E-09  | -0.010 | 0.010 | 2.40E-01 |
| HDLC | rs34675318  | G | 0.71 | 0.017  | 0.002 | 3.75E-15  | -0.010 | 0.009 | 2.10E-01 |
| HDLC | rs3803501   | G | 0.43 | -0.018 | 0.002 | 2.75E-20  | -0.015 | 0.008 | 4.70E-02 |
| HDLC | rs7170463   | A | 0.69 | -0.019 | 0.002 | 5.49E-20  | 0.005  | 0.008 | 6.70E-01 |
| HDLC | rs11075985  | C | 0.58 | 0.015  | 0.002 | 1.76E-14  | -0.021 | 0.008 | 7.20E-03 |
| HDLC | rs113710278 | C | 0.99 | -0.055 | 0.008 | 4.83E-12  | -0.024 | 0.033 | 4.30E-01 |
| HDLC | rs11640494  | G | 0.54 | 0.015  | 0.002 | 4.67E-16  | -0.006 | 0.008 | 4.40E-01 |
| HDLC | rs11645157  | T | 0.51 | -0.019 | 0.002 | 4.76E-23  | 0.012  | 0.008 | 1.70E-01 |
| HDLC | rs12926854  | A | 0.73 | -0.012 | 0.002 | 6.99E-09  | -0.004 | 0.009 | 6.50E-01 |
| HDLC | rs12928099  | C | 0.70 | -0.021 | 0.002 | 4.57E-25  | 0.015  | 0.008 | 9.80E-02 |
| HDLC | rs138026745 | G | 0.97 | -0.034 | 0.006 | 4.71E-08  | 0.002  | 0.026 | 9.30E-01 |
| HDLC | rs142493909 | T | 0.98 | -0.067 | 0.007 | 1.07E-21  | 0.033  | 0.031 | 4.00E-01 |
| HDLC | rs2925979   | T | 0.30 | -0.037 | 0.002 | 1.86E-73  | 0.019  | 0.008 | 2.20E-02 |
| HDLC | rs34830321  | C | 0.99 | 0.048  | 0.008 | 5.62E-09  | 0.018  | 0.034 | 6.60E-01 |
| HDLC | rs3814883   | C | 0.52 | 0.015  | 0.002 | 7.28E-16  | -0.001 | 0.008 | 8.40E-01 |
| HDLC | rs545858676 | A | 0.96 | 0.098  | 0.006 | 1.18E-58  | 0.017  | 0.024 | 5.40E-01 |
| HDLC | rs55781197  | A | 0.88 | -0.059 | 0.003 | 2.65E-88  | 0.004  | 0.012 | 7.80E-01 |
| HDLC | rs6499102   | A | 0.06 | -0.035 | 0.004 | 1.79E-18  | -0.010 | 0.016 | 5.80E-01 |
| HDLC | rs7188071   | T | 0.35 | -0.011 | 0.002 | 3.11E-08  | 0.018  | 0.008 | 2.70E-02 |
| HDLC | rs75152587  | G | 0.99 | 0.094  | 0.009 | 1.14E-28  | -0.051 | 0.035 | 1.70E-01 |
| HDLC | rs79311290  | A | 0.89 | 0.018  | 0.003 | 8.65E-09  | -0.010 | 0.013 | 4.50E-01 |
| HDLC | rs79600951  | C | 0.91 | 0.107  | 0.003 | 2.04E-235 | -0.022 | 0.013 | 1.30E-01 |
| HDLC | rs79616633  | C | 0.98 | 0.036  | 0.006 | 2.13E-08  | -0.014 | 0.026 | 7.20E-01 |
| HDLC | rs9989419   | A | 0.39 | -0.144 | 0.002 | 0.00E+00  | 0.014  | 0.008 | 7.30E-02 |
| HDLC | rs112001035 | G | 0.94 | 0.047  | 0.004 | 2.79E-30  | 0.033  | 0.017 | 5.10E-02 |
| HDLC | rs11653260  | A | 0.79 | 0.013  | 0.002 | 8.70E-09  | 0.007  | 0.009 | 4.40E-01 |
| HDLC | rs11658786  | G | 0.33 | -0.031 | 0.002 | 1.52E-51  | 0.025  | 0.008 | 4.00E-03 |
| HDLC | rs11658872  | C | 0.94 | 0.033  | 0.004 | 1.18E-15  | -0.006 | 0.017 | 6.90E-01 |
| HDLC | rs117499775 | T | 0.96 | 0.028  | 0.005 | 5.88E-09  | -0.044 | 0.020 | 1.90E-02 |
| HDLC | rs141062196 | G | 0.81 | 0.019  | 0.002 | 5.70E-15  | 0.002  | 0.010 | 8.10E-01 |

|      |             |   |      |        |       |           |        |       |          |
|------|-------------|---|------|--------|-------|-----------|--------|-------|----------|
| HDLC | rs16975758  | G | 0.62 | -0.012 | 0.002 | 5.03E-09  | -0.003 | 0.008 | 5.60E-01 |
| HDLC | rs2011614   | G | 0.65 | 0.014  | 0.002 | 4.24E-13  | -0.007 | 0.008 | 4.40E-01 |
| HDLC | rs2071379   | A | 0.40 | 0.013  | 0.002 | 4.24E-12  | 0.002  | 0.008 | 9.10E-01 |
| HDLC | rs2314338   | T | 0.73 | 0.016  | 0.002 | 2.94E-13  | 0.005  | 0.009 | 5.60E-01 |
| HDLC | rs2585398   | C | 0.45 | 0.013  | 0.002 | 1.83E-11  | 0.003  | 0.008 | 8.80E-01 |
| HDLC | rs34138141  | G | 0.72 | 0.018  | 0.002 | 1.51E-16  | -0.008 | 0.009 | 3.40E-01 |
| HDLC | rs3794752   | T | 0.72 | -0.013 | 0.002 | 1.97E-09  | -0.003 | 0.009 | 7.80E-01 |
| HDLC | rs4969141   | C | 0.51 | -0.030 | 0.002 | 3.44E-54  | 0.014  | 0.008 | 6.60E-02 |
| HDLC | rs595767    | A | 0.48 | 0.014  | 0.002 | 5.30E-14  | -0.003 | 0.008 | 5.90E-01 |
| HDLC | rs7218647   | G | 0.44 | -0.011 | 0.002 | 1.74E-08  | 0.002  | 0.008 | 6.40E-01 |
| HDLC | rs72836561  | C | 0.97 | 0.171  | 0.005 | 2.18E-212 | -0.012 | 0.022 | 6.10E-01 |
| HDLC | rs74456742  | G | 0.96 | -0.036 | 0.005 | 2.18E-12  | 0.026  | 0.021 | 1.90E-01 |
| HDLC | rs8081548   | T | 0.34 | -0.018 | 0.002 | 7.87E-20  | 0.020  | 0.008 | 1.50E-02 |
| HDLC | rs11664369  | C | 0.73 | 0.023  | 0.002 | 1.45E-26  | 0.006  | 0.009 | 5.40E-01 |
| HDLC | rs117687565 | C | 0.99 | -0.083 | 0.009 | 1.23E-19  | 0.036  | 0.038 | 4.10E-01 |
| HDLC | rs150237291 | T | 0.98 | -0.045 | 0.007 | 5.59E-12  | -0.055 | 0.026 | 3.90E-02 |
| HDLC | rs2298624   | C | 0.87 | -0.030 | 0.003 | 1.02E-26  | -0.016 | 0.011 | 1.30E-01 |
| HDLC | rs2435307   | C | 0.51 | -0.016 | 0.002 | 3.32E-17  | 0.006  | 0.008 | 4.90E-01 |
| HDLC | rs4800356   | C | 0.71 | 0.016  | 0.002 | 1.61E-12  | -0.004 | 0.009 | 4.10E-01 |
| HDLC | rs56017932  | G | 0.80 | -0.015 | 0.003 | 8.02E-09  | 0.017  | 0.011 | 9.00E-02 |
| HDLC | rs62092069  | G | 0.63 | -0.013 | 0.002 | 3.78E-11  | 0.020  | 0.008 | 1.20E-02 |
| HDLC | rs680321    | T | 0.54 | -0.011 | 0.002 | 1.35E-08  | 0.000  | 0.008 | 9.60E-01 |
| HDLC | rs73455693  | G | 0.96 | -0.028 | 0.005 | 3.67E-08  | 0.003  | 0.021 | 8.90E-01 |
| HDLC | rs77960347  | A | 0.99 | -0.291 | 0.008 | 3.87E-269 | -0.076 | 0.033 | 2.60E-02 |
| HDLC | rs8086351   | C | 0.18 | -0.084 | 0.003 | 1.80E-245 | -0.007 | 0.010 | 4.90E-01 |
| HDLC | rs116843064 | G | 0.98 | -0.206 | 0.007 | 6.37E-195 | -0.005 | 0.028 | 8.80E-01 |
| HDLC | rs11878235  | G | 0.41 | -0.013 | 0.002 | 8.25E-11  | 0.021  | 0.008 | 9.10E-03 |
| HDLC | rs11880219  | T | 0.82 | 0.021  | 0.002 | 4.85E-17  | 0.006  | 0.010 | 4.50E-01 |
| HDLC | rs12150914  | T | 0.40 | 0.015  | 0.002 | 1.68E-14  | -0.003 | 0.008 | 6.80E-01 |
| HDLC | rs12975319  | G | 0.70 | 0.014  | 0.002 | 7.11E-11  | -0.021 | 0.008 | 6.80E-03 |
| HDLC | rs12976395  | G | 0.50 | -0.041 | 0.002 | 1.26E-90  | -0.008 | 0.008 | 3.50E-01 |
| HDLC | rs144311893 | C | 0.98 | -0.081 | 0.007 | 8.71E-34  | -0.025 | 0.028 | 3.70E-01 |
| HDLC | rs1468642   | T | 0.65 | 0.017  | 0.002 | 7.61E-18  | -0.004 | 0.008 | 5.50E-01 |
| HDLC | rs15052     | T | 0.82 | -0.016 | 0.003 | 1.60E-10  | 0.013  | 0.010 | 2.10E-01 |
| HDLC | rs2289863   | C | 0.25 | 0.018  | 0.002 | 6.03E-16  | -0.008 | 0.009 | 4.20E-01 |
| HDLC | rs2965169   | A | 0.61 | -0.012 | 0.002 | 5.46E-10  | -0.025 | 0.008 | 3.50E-03 |
| HDLC | rs34559316  | C | 0.81 | 0.014  | 0.002 | 1.62E-08  | -0.015 | 0.010 | 1.40E-01 |
| HDLC | rs35137994  | C | 0.94 | -0.046 | 0.004 | 3.41E-29  | 0.002  | 0.017 | 9.10E-01 |
| HDLC | rs36092527  | T | 0.88 | 0.017  | 0.003 | 1.49E-08  | -0.001 | 0.012 | 9.30E-01 |
| HDLC | rs367070    | A | 0.77 | -0.042 | 0.002 | 1.36E-74  | 0.001  | 0.009 | 8.80E-01 |
| HDLC | rs429358    | T | 0.85 | 0.075  | 0.003 | 7.21E-180 | 0.121  | 0.011 | 1.50E-29 |
| HDLC | rs4760      | A | 0.84 | 0.019  | 0.003 | 3.67E-13  | 0.014  | 0.011 | 2.00E-01 |
| HDLC | rs59737437  | C | 0.73 | -0.012 | 0.002 | 4.22E-08  | 0.004  | 0.009 | 6.50E-01 |
| HDLC | rs62102718  | A | 0.71 | 0.024  | 0.002 | 2.91E-29  | -0.012 | 0.009 | 1.60E-01 |
| HDLC | rs62112763  | C | 0.56 | 0.014  | 0.002 | 2.40E-13  | -0.022 | 0.008 | 8.60E-04 |
| HDLC | rs7251640   | T | 0.81 | -0.014 | 0.002 | 4.27E-09  | 0.008  | 0.010 | 5.60E-01 |
| HDLC | rs737338    | C | 0.96 | 0.089  | 0.005 | 1.40E-66  | -0.017 | 0.021 | 4.60E-01 |
| HDLC | rs76213248  | C | 0.59 | -0.013 | 0.002 | 6.95E-12  | -0.013 | 0.008 | 9.60E-02 |
| HDLC | rs76246107  | G | 0.92 | 0.021  | 0.004 | 7.46E-09  | 0.005  | 0.015 | 6.80E-01 |
| HDLC | rs8102873   | C | 0.42 | 0.011  | 0.002 | 1.42E-08  | 0.003  | 0.008 | 7.70E-01 |
| HDLC | rs1132274   | C | 0.85 | 0.022  | 0.003 | 1.23E-16  | 0.007  | 0.011 | 5.40E-01 |
| HDLC | rs144033177 | A | 0.98 | 0.056  | 0.008 | 1.07E-12  | -0.087 | 0.031 | 4.90E-03 |
| HDLC | rs1800961   | C | 0.97 | 0.139  | 0.006 | 1.44E-140 | -0.008 | 0.022 | 6.20E-01 |
| HDLC | rs1884589   | A | 0.43 | 0.013  | 0.002 | 1.52E-11  | -0.010 | 0.008 | 1.90E-01 |
| HDLC | rs3736802   | T | 0.48 | -0.017 | 0.002 | 1.10E-18  | -0.005 | 0.008 | 5.60E-01 |
| HDLC | rs3859588   | T | 0.78 | 0.013  | 0.002 | 1.04E-08  | -0.011 | 0.009 | 2.80E-01 |

|      |             |   |      |        |       |           |        |       |          |
|------|-------------|---|------|--------|-------|-----------|--------|-------|----------|
| HDLC | rs4239651   | T | 0.21 | -0.026 | 0.002 | 3.72E-28  | -0.019 | 0.009 | 5.70E-02 |
| HDLC | rs6021914   | T | 0.63 | -0.012 | 0.002 | 1.20E-09  | 0.018  | 0.008 | 2.20E-02 |
| HDLC | rs6059958   | C | 0.83 | -0.015 | 0.003 | 9.77E-09  | -0.012 | 0.010 | 2.40E-01 |
| HDLC | rs6073958   | T | 0.80 | 0.061  | 0.002 | 6.45E-143 | -0.001 | 0.010 | 9.50E-01 |
| HDLC | rs6123685   | G | 0.75 | -0.016 | 0.002 | 3.15E-13  | 0.011  | 0.009 | 1.40E-01 |
| HDLC | rs6131012   | A | 0.60 | -0.011 | 0.002 | 9.64E-09  | 0.008  | 0.008 | 3.10E-01 |
| HDLC | rs76602912  | T | 0.98 | 0.043  | 0.006 | 4.22E-12  | 0.008  | 0.026 | 7.90E-01 |
| HDLC | rs8126001   | C | 0.51 | -0.012 | 0.002 | 1.57E-09  | 0.008  | 0.008 | 2.30E-01 |
| HDLC | rs235314    | C | 0.47 | 0.018  | 0.002 | 2.31E-20  | -0.001 | 0.008 | 7.20E-01 |
| HDLC | rs3746915   | A | 0.42 | -0.011 | 0.002 | 1.98E-08  | 0.003  | 0.008 | 7.70E-01 |
| HDLC | rs407133    | G | 0.44 | 0.011  | 0.002 | 4.77E-08  | -0.013 | 0.008 | 9.40E-02 |
| HDLC | rs8127283   | G | 0.51 | 0.012  | 0.002 | 5.23E-09  | 0.003  | 0.009 | 7.30E-01 |
| HDLC | rs9980311   | A | 0.74 | 0.015  | 0.002 | 1.16E-11  | -0.001 | 0.009 | 8.80E-01 |
| HDLC | rs133015    | C | 0.56 | -0.021 | 0.002 | 1.47E-26  | 0.000  | 0.008 | 9.40E-01 |
| HDLC | rs1894544   | G | 0.55 | 0.011  | 0.002 | 5.19E-09  | -0.007 | 0.008 | 3.00E-01 |
| HDLC | rs2256609   | A | 0.81 | 0.033  | 0.002 | 2.32E-41  | 0.023  | 0.010 | 1.90E-02 |
| HDLC | rs55652051  | A | 0.77 | 0.015  | 0.002 | 4.55E-11  | -0.022 | 0.009 | 2.50E-02 |
| HDLC | rs6002946   | G | 0.32 | -0.012 | 0.002 | 1.31E-08  | 0.005  | 0.008 | 5.50E-01 |
| HDLC | rs738409    | C | 0.78 | 0.014  | 0.002 | 5.14E-10  | -0.195 | 0.009 | 5.60E-95 |
| HDLC | rs9608972   | T | 0.76 | 0.017  | 0.002 | 1.56E-14  | -0.003 | 0.009 | 6.40E-01 |
| HDLC | rs9610329   | C | 0.57 | 0.011  | 0.002 | 1.66E-08  | -0.025 | 0.008 | 1.30E-03 |
| HDLC | rs9622830   | C | 0.65 | 0.016  | 0.002 | 4.74E-16  | -0.004 | 0.008 | 6.60E-01 |
| LDLC | rs10910476  | C | 0.44 | -0.012 | 0.002 | 4.33E-09  | 0.003  | 0.008 | 7.50E-01 |
| LDLC | rs11206517  | T | 0.97 | -0.068 | 0.006 | 5.90E-32  | 0.024  | 0.022 | 3.30E-01 |
| LDLC | rs11206788  | G | 0.41 | -0.014 | 0.002 | 1.99E-10  | 0.005  | 0.008 | 5.90E-01 |
| LDLC | rs114165349 | G | 0.98 | -0.056 | 0.007 | 8.04E-16  | -0.027 | 0.026 | 2.70E-01 |
| LDLC | rs115458560 | T | 0.98 | 0.050  | 0.008 | 6.62E-11  | -0.018 | 0.029 | 4.90E-01 |
| LDLC | rs11591147  | G | 0.98 | 0.349  | 0.008 | 0.00E+00  | -0.027 | 0.029 | 3.10E-01 |
| LDLC | rs1168127   | C | 0.35 | -0.039 | 0.002 | 1.87E-70  | 0.004  | 0.008 | 7.70E-01 |
| LDLC | rs12078100  | C | 0.38 | -0.013 | 0.002 | 9.32E-10  | -0.001 | 0.008 | 7.20E-01 |
| LDLC | rs140584594 | A | 0.27 | 0.014  | 0.002 | 5.80E-10  | -0.039 | 0.009 | 1.20E-05 |
| LDLC | rs1556562   | G | 0.21 | -0.019 | 0.002 | 1.99E-14  | 0.002  | 0.009 | 6.80E-01 |
| LDLC | rs2642438   | A | 0.30 | -0.025 | 0.002 | 7.59E-29  | -0.052 | 0.008 | 1.70E-09 |
| LDLC | rs28631087  | T | 0.79 | 0.016  | 0.003 | 2.17E-10  | -0.008 | 0.009 | 4.00E-01 |
| LDLC | rs472495    | G | 0.35 | -0.043 | 0.002 | 5.51E-85  | 0.003  | 0.008 | 7.90E-01 |
| LDLC | rs4970834   | C | 0.81 | 0.105  | 0.003 | 0.00E+00  | -0.012 | 0.010 | 1.50E-01 |
| LDLC | rs541155877 | C | 0.99 | 0.069  | 0.011 | 6.30E-10  | -0.021 | 0.041 | 5.10E-01 |
| LDLC | rs556107    | C | 0.48 | -0.035 | 0.002 | 8.04E-64  | -0.016 | 0.008 | 5.60E-02 |
| LDLC | rs61775180  | C | 0.58 | 0.026  | 0.002 | 1.67E-35  | -0.008 | 0.008 | 3.20E-01 |
| LDLC | rs61778883  | T | 0.13 | -0.019 | 0.003 | 2.37E-09  | 0.007  | 0.012 | 4.80E-01 |
| LDLC | rs6667939   | C | 0.28 | -0.015 | 0.002 | 7.06E-11  | -0.002 | 0.009 | 6.90E-01 |
| LDLC | rs6693893   | T | 0.96 | 0.075  | 0.006 | 3.11E-40  | 0.015  | 0.021 | 5.40E-01 |
| LDLC | rs77257036  | C | 0.65 | 0.012  | 0.002 | 3.79E-08  | -0.009 | 0.008 | 3.40E-01 |
| LDLC | rs880315    | T | 0.66 | 0.015  | 0.002 | 6.83E-12  | 0.011  | 0.008 | 7.60E-02 |
| LDLC | rs11568318  | C | 0.93 | -0.026 | 0.004 | 7.39E-10  | -0.002 | 0.015 | 7.50E-01 |
| LDLC | rs12471768  | T | 0.30 | -0.014 | 0.002 | 2.47E-09  | -0.018 | 0.008 | 2.30E-02 |
| LDLC | rs1250258   | C | 0.26 | -0.014 | 0.002 | 6.80E-09  | -0.004 | 0.009 | 6.00E-01 |
| LDLC | rs1260326   | T | 0.40 | 0.035  | 0.002 | 5.58E-60  | 0.039  | 0.008 | 4.10E-07 |
| LDLC | rs12990177  | A | 0.48 | -0.015 | 0.002 | 1.07E-12  | -0.004 | 0.008 | 7.00E-01 |
| LDLC | rs150474434 | G | 0.90 | 0.035  | 0.003 | 1.42E-23  | -0.027 | 0.013 | 3.60E-02 |
| LDLC | rs17050272  | G | 0.59 | 0.021  | 0.002 | 3.14E-22  | -0.005 | 0.008 | 4.90E-01 |
| LDLC | rs1731243   | C | 0.39 | -0.013 | 0.002 | 7.07E-10  | -0.006 | 0.008 | 3.00E-01 |
| LDLC | rs2287622   | A | 0.40 | 0.021  | 0.002 | 3.20E-23  | 0.000  | 0.008 | 8.20E-01 |
| LDLC | rs2718717   | A | 0.86 | -0.019 | 0.003 | 2.64E-10  | 0.000  | 0.011 | 9.40E-01 |
| LDLC | rs4299376   | G | 0.32 | 0.054  | 0.002 | 3.47E-131 | 0.011  | 0.008 | 1.20E-01 |
| LDLC | rs430096    | A | 0.78 | 0.054  | 0.003 | 2.35E-103 | -0.004 | 0.009 | 5.80E-01 |

|      |             |   |      |        |       |           |        |       |          |
|------|-------------|---|------|--------|-------|-----------|--------|-------|----------|
| LDLC | rs4954192   | C | 0.63 | -0.015 | 0.002 | 5.69E-12  | -0.003 | 0.008 | 6.40E-01 |
| LDLC | rs56236159  | T | 0.87 | -0.018 | 0.003 | 7.04E-09  | 0.006  | 0.011 | 6.50E-01 |
| LDLC | rs6709904   | A | 0.89 | 0.044  | 0.003 | 8.74E-40  | 0.006  | 0.012 | 6.80E-01 |
| LDLC | rs72774870  | C | 0.93 | 0.022  | 0.004 | 3.88E-08  | 0.012  | 0.015 | 4.50E-01 |
| LDLC | rs7562734   | G | 0.68 | 0.020  | 0.002 | 2.24E-19  | -0.009 | 0.008 | 2.60E-01 |
| LDLC | rs7569317   | T | 0.47 | -0.018 | 0.002 | 8.70E-18  | -0.008 | 0.008 | 2.40E-01 |
| LDLC | rs907866    | G | 0.55 | 0.018  | 0.002 | 3.73E-17  | 0.011  | 0.008 | 2.40E-01 |
| LDLC | rs934197    | G | 0.66 | -0.083 | 0.002 | 0.00E+00  | 0.005  | 0.008 | 6.20E-01 |
| LDLC | rs113177823 | G | 0.95 | 0.041  | 0.005 | 1.24E-18  | -0.031 | 0.017 | 6.10E-02 |
| LDLC | rs13076933  | T | 0.74 | 0.021  | 0.002 | 3.03E-18  | 0.007  | 0.009 | 4.70E-01 |
| LDLC | rs3732359   | G | 0.22 | 0.017  | 0.003 | 4.74E-12  | 0.003  | 0.009 | 6.10E-01 |
| LDLC | rs3932048   | C | 0.68 | -0.014 | 0.002 | 5.75E-10  | -0.013 | 0.008 | 1.30E-01 |
| LDLC | rs55921103  | G | 0.35 | -0.014 | 0.002 | 5.07E-10  | -0.002 | 0.008 | 6.60E-01 |
| LDLC | rs71311871  | A | 0.92 | 0.028  | 0.004 | 6.65E-14  | 0.018  | 0.014 | 3.10E-01 |
| LDLC | rs9832727   | C | 0.66 | 0.015  | 0.002 | 2.06E-11  | 0.006  | 0.008 | 3.20E-01 |
| LDLC | rs9834932   | A | 0.91 | 0.032  | 0.004 | 1.11E-18  | -0.008 | 0.014 | 5.50E-01 |
| LDLC | rs9841897   | T | 0.84 | -0.019 | 0.003 | 1.31E-10  | 0.009  | 0.011 | 3.90E-01 |
| LDLC | rs1229984   | T | 0.03 | -0.053 | 0.006 | 7.41E-17  | -0.158 | 0.025 | 7.00E-10 |
| LDLC | rs13107325  | C | 0.93 | 0.025  | 0.004 | 6.02E-10  | -0.011 | 0.015 | 4.00E-01 |
| LDLC | rs13108218  | A | 0.39 | 0.018  | 0.002 | 2.07E-16  | 0.005  | 0.008 | 5.60E-01 |
| LDLC | rs1458038   | C | 0.71 | 0.019  | 0.002 | 6.94E-16  | 0.000  | 0.009 | 9.20E-01 |
| LDLC | rs576573069 | T | 0.33 | -0.014 | 0.002 | 2.86E-09  | -0.015 | 0.008 | 8.30E-02 |
| LDLC | rs9884390   | T | 0.77 | -0.025 | 0.002 | 7.16E-24  | -0.013 | 0.009 | 1.50E-01 |
| LDLC | rs990619    | C | 0.48 | 0.012  | 0.002 | 1.85E-08  | 0.003  | 0.008 | 5.50E-01 |
| LDLC | rs1016988   | T | 0.81 | 0.017  | 0.003 | 5.19E-11  | 0.008  | 0.010 | 4.00E-01 |
| LDLC | rs116734477 | C | 0.96 | 0.047  | 0.005 | 2.76E-19  | 0.018  | 0.019 | 3.50E-01 |
| LDLC | rs12916     | T | 0.60 | -0.062 | 0.002 | 2.23E-187 | 0.009  | 0.008 | 2.40E-01 |
| LDLC | rs146433259 | C | 0.99 | 0.057  | 0.010 | 4.57E-08  | 0.019  | 0.038 | 7.40E-01 |
| LDLC | rs2925677   | C | 0.79 | 0.019  | 0.003 | 1.09E-13  | 0.006  | 0.009 | 5.70E-01 |
| LDLC | rs6874202   | T | 0.37 | -0.032 | 0.002 | 1.24E-50  | 0.018  | 0.008 | 2.40E-02 |
| LDLC | rs7734476   | G | 0.45 | -0.019 | 0.002 | 3.93E-19  | -0.001 | 0.008 | 9.70E-01 |
| LDLC | rs9686661   | C | 0.80 | -0.015 | 0.003 | 1.13E-08  | -0.041 | 0.010 | 2.70E-05 |
| LDLC | rs117733303 | A | 0.98 | -0.084 | 0.008 | 2.48E-27  | 0.048  | 0.029 | 1.20E-01 |
| LDLC | rs118039278 | G | 0.92 | -0.084 | 0.004 | 2.23E-102 | 0.007  | 0.014 | 6.80E-01 |
| LDLC | rs12208357  | C | 0.93 | -0.057 | 0.004 | 3.44E-44  | 0.057  | 0.015 | 8.20E-05 |
| LDLC | rs146534110 | G | 0.99 | -0.068 | 0.009 | 8.69E-14  | 0.013  | 0.033 | 7.20E-01 |
| LDLC | rs3179865   | G | 0.60 | -0.021 | 0.002 | 1.89E-19  | -0.014 | 0.009 | 1.00E-01 |
| LDLC | rs34392107  | G | 0.88 | -0.046 | 0.003 | 5.78E-45  | 0.008  | 0.012 | 4.30E-01 |
| LDLC | rs34568880  | C | 0.99 | -0.056 | 0.009 | 6.12E-10  | 0.018  | 0.035 | 6.70E-01 |
| LDLC | rs3822855   | G | 0.60 | -0.018 | 0.002 | 3.49E-17  | 0.016  | 0.008 | 5.70E-02 |
| LDLC | rs73025516  | A | 0.96 | 0.031  | 0.005 | 9.23E-10  | -0.013 | 0.019 | 5.30E-01 |
| LDLC | rs76967117  | G | 0.89 | 0.028  | 0.003 | 2.06E-17  | -0.003 | 0.012 | 7.70E-01 |
| LDLC | rs7746081   | G | 0.70 | 0.023  | 0.002 | 4.59E-25  | 0.004  | 0.008 | 5.10E-01 |
| LDLC | rs7776054   | A | 0.74 | 0.016  | 0.002 | 7.05E-12  | -0.006 | 0.009 | 4.10E-01 |
| LDLC | rs79220007  | T | 0.92 | 0.057  | 0.004 | 1.54E-48  | -0.044 | 0.015 | 1.80E-03 |
| LDLC | rs913499    | A | 0.49 | 0.012  | 0.002 | 9.75E-09  | -0.002 | 0.008 | 9.00E-01 |
| LDLC | rs9471975   | T | 0.42 | 0.013  | 0.002 | 1.11E-09  | -0.006 | 0.008 | 3.70E-01 |
| LDLC | rs9491699   | C | 0.52 | -0.014 | 0.002 | 1.93E-11  | -0.016 | 0.008 | 6.10E-02 |
| LDLC | rs9496567   | G | 0.76 | 0.018  | 0.002 | 5.85E-13  | -0.013 | 0.009 | 1.80E-01 |
| LDLC | rs10231941  | T | 0.82 | -0.020 | 0.003 | 3.04E-13  | -0.009 | 0.010 | 2.70E-01 |
| LDLC | rs111338114 | A | 0.94 | 0.029  | 0.005 | 4.67E-09  | -0.024 | 0.019 | 2.20E-01 |
| LDLC | rs112758337 | G | 0.81 | 0.016  | 0.003 | 1.64E-09  | -0.001 | 0.010 | 9.40E-01 |
| LDLC | rs2073547   | A | 0.82 | -0.036 | 0.003 | 2.44E-40  | -0.014 | 0.010 | 1.80E-01 |
| LDLC | rs28406917  | C | 0.57 | -0.012 | 0.002 | 1.76E-08  | 0.001  | 0.008 | 9.10E-01 |
| LDLC | rs4148826   | T | 0.82 | 0.016  | 0.003 | 6.51E-09  | 0.006  | 0.010 | 4.10E-01 |
| LDLC | rs4722551   | T | 0.84 | -0.024 | 0.003 | 1.30E-17  | 0.016  | 0.011 | 8.70E-02 |



|      |             |   |      |        |       |           |        |       |          |
|------|-------------|---|------|--------|-------|-----------|--------|-------|----------|
| LDLC | rs56130071  | G | 0.78 | -0.033 | 0.003 | 4.75E-39  | 0.007  | 0.009 | 3.60E-01 |
| LDLC | rs67050321  | T | 0.70 | -0.015 | 0.002 | 2.25E-11  | -0.015 | 0.009 | 7.20E-02 |
| LDLC | rs836550    | A | 0.59 | -0.012 | 0.002 | 4.65E-08  | -0.004 | 0.008 | 5.30E-01 |
| LDLC | rs869412    | T | 0.77 | 0.014  | 0.003 | 1.17E-08  | 0.006  | 0.009 | 4.80E-01 |
| LDLC | rs117139027 | G | 0.98 | 0.057  | 0.008 | 7.20E-13  | -0.013 | 0.030 | 5.50E-01 |
| LDLC | rs11786083  | G | 0.63 | -0.016 | 0.002 | 7.12E-13  | 0.013  | 0.008 | 1.40E-01 |
| LDLC | rs1350559   | C | 0.60 | -0.014 | 0.002 | 1.48E-10  | 0.004  | 0.008 | 5.40E-01 |
| LDLC | rs1495741   | G | 0.22 | 0.017  | 0.003 | 4.62E-12  | -0.008 | 0.009 | 3.70E-01 |
| LDLC | rs2737265   | A | 0.72 | 0.020  | 0.002 | 1.88E-18  | 0.002  | 0.009 | 6.70E-01 |
| LDLC | rs28601761  | C | 0.58 | 0.062  | 0.002 | 1.15E-184 | 0.047  | 0.008 | 2.00E-09 |
| LDLC | rs28768427  | G | 0.48 | -0.012 | 0.002 | 1.26E-08  | -0.011 | 0.008 | 1.40E-01 |
| LDLC | rs4620259   | A | 0.81 | -0.015 | 0.003 | 4.65E-08  | -0.007 | 0.010 | 5.00E-01 |
| LDLC | rs4738684   | A | 0.34 | 0.032  | 0.002 | 3.33E-46  | 0.014  | 0.008 | 5.70E-02 |
| LDLC | rs59328596  | G | 0.85 | 0.018  | 0.003 | 8.93E-10  | 0.001  | 0.011 | 8.00E-01 |
| LDLC | rs72638977  | A | 0.97 | 0.033  | 0.006 | 1.33E-08  | -0.011 | 0.021 | 7.50E-01 |
| LDLC | rs9298506   | A | 0.79 | -0.019 | 0.003 | 2.52E-13  | -0.001 | 0.010 | 9.80E-01 |
| LDLC | rs9987289   | A | 0.09 | -0.045 | 0.004 | 4.79E-36  | -0.023 | 0.014 | 9.50E-02 |
| LDLC | rs10448340  | T | 0.68 | 0.015  | 0.002 | 1.41E-11  | 0.015  | 0.008 | 7.50E-02 |
| LDLC | rs115478735 | A | 0.82 | -0.056 | 0.003 | 8.98E-96  | -0.023 | 0.010 | 2.00E-02 |
| LDLC | rs11789603  | C | 0.89 | -0.025 | 0.003 | 1.21E-13  | 0.010  | 0.012 | 3.60E-01 |
| LDLC | rs13283282  | C | 0.85 | 0.021  | 0.003 | 2.62E-12  | -0.028 | 0.011 | 2.70E-02 |
| LDLC | rs2066714   | T | 0.87 | -0.021 | 0.003 | 1.59E-11  | 0.009  | 0.012 | 6.30E-01 |
| LDLC | rs2740488   | A | 0.73 | 0.025  | 0.002 | 7.77E-27  | -0.009 | 0.009 | 3.40E-01 |
| LDLC | rs3780181   | A | 0.93 | 0.028  | 0.004 | 2.88E-11  | 0.004  | 0.016 | 6.50E-01 |
| LDLC | rs6475606   | C | 0.52 | 0.020  | 0.002 | 1.98E-22  | 0.003  | 0.008 | 7.30E-01 |
| LDLC | rs6560499   | G | 0.42 | 0.012  | 0.002 | 8.07E-09  | -0.011 | 0.008 | 1.70E-01 |
| LDLC | rs11014204  | C | 0.72 | -0.014 | 0.002 | 3.28E-09  | -0.016 | 0.009 | 3.90E-02 |
| LDLC | rs12246352  | A | 0.90 | -0.026 | 0.003 | 6.77E-14  | 0.004  | 0.013 | 7.60E-01 |
| LDLC | rs17476364  | T | 0.89 | 0.022  | 0.003 | 9.05E-11  | -0.020 | 0.012 | 1.60E-01 |
| LDLC | rs2068888   | G | 0.55 | 0.019  | 0.002 | 5.27E-20  | 0.013  | 0.008 | 8.30E-02 |
| LDLC | rs2250802   | G | 0.28 | 0.018  | 0.002 | 5.99E-15  | 0.054  | 0.009 | 1.40E-09 |
| LDLC | rs7090758   | T | 0.53 | 0.012  | 0.002 | 1.61E-08  | 0.012  | 0.008 | 1.80E-01 |
| LDLC | rs72823020  | T | 0.87 | 0.021  | 0.003 | 5.62E-12  | -0.010 | 0.011 | 3.70E-01 |
| LDLC | rs79828839  | C | 0.80 | -0.015 | 0.003 | 2.44E-08  | -0.013 | 0.010 | 2.10E-01 |
| LDLC | rs10832963  | T | 0.26 | -0.017 | 0.002 | 4.10E-13  | 0.003  | 0.009 | 7.10E-01 |
| LDLC | rs11227247  | A | 0.87 | -0.018 | 0.003 | 5.74E-09  | 0.005  | 0.011 | 7.30E-01 |
| LDLC | rs115739682 | T | 0.81 | 0.016  | 0.003 | 1.39E-09  | 0.005  | 0.010 | 6.20E-01 |
| LDLC | rs11601507  | C | 0.93 | -0.032 | 0.004 | 1.69E-15  | -0.009 | 0.015 | 4.10E-01 |
| LDLC | rs174564    | A | 0.65 | 0.032  | 0.002 | 3.11E-48  | 0.000  | 0.008 | 9.90E-01 |
| LDLC | rs59379014  | C | 0.93 | -0.055 | 0.004 | 3.25E-43  | 0.011  | 0.015 | 4.30E-01 |
| LDLC | rs6589939   | A | 0.62 | -0.013 | 0.002 | 7.00E-10  | -0.015 | 0.008 | 5.60E-02 |
| LDLC | rs7108486   | T | 0.98 | 0.039  | 0.007 | 1.84E-08  | -0.007 | 0.026 | 6.60E-01 |
| LDLC | rs74869459  | T | 0.76 | 0.017  | 0.002 | 2.97E-12  | 0.018  | 0.009 | 6.60E-02 |
| LDLC | rs964184    | G | 0.13 | 0.057  | 0.003 | 1.61E-78  | 0.007  | 0.011 | 5.10E-01 |
| LDLC | rs1007938   | A | 0.59 | -0.012 | 0.002 | 1.26E-08  | 0.017  | 0.008 | 1.60E-02 |
| LDLC | rs112403212 | C | 0.86 | -0.017 | 0.003 | 1.20E-08  | 0.003  | 0.011 | 8.30E-01 |
| LDLC | rs1169294   | G | 0.69 | -0.025 | 0.002 | 2.00E-27  | -0.014 | 0.008 | 7.30E-02 |
| LDLC | rs2160994   | T | 0.35 | -0.018 | 0.002 | 4.07E-17  | 0.015  | 0.008 | 9.90E-02 |
| LDLC | rs35882350  | A | 0.74 | -0.014 | 0.002 | 5.00E-09  | -0.015 | 0.009 | 9.70E-02 |
| LDLC | rs597808    | A | 0.48 | -0.027 | 0.002 | 2.00E-38  | 0.005  | 0.008 | 6.80E-01 |
| LDLC | rs61754230  | C | 0.98 | -0.043 | 0.007 | 1.17E-08  | -0.104 | 0.028 | 4.60E-04 |
| LDLC | rs2238162   | C | 0.48 | 0.016  | 0.002 | 3.45E-15  | -0.014 | 0.008 | 6.70E-02 |
| LDLC | rs551473284 | T | 0.37 | -0.013 | 0.002 | 1.39E-09  | -0.018 | 0.008 | 1.40E-02 |
| LDLC | rs6602912   | T | 0.72 | -0.022 | 0.002 | 5.48E-22  | 0.001  | 0.009 | 9.90E-01 |
| LDLC | rs11621792  | C | 0.55 | -0.019 | 0.002 | 1.29E-19  | -0.023 | 0.008 | 2.60E-03 |
| LDLC | rs145730801 | T | 0.96 | -0.036 | 0.005 | 3.57E-12  | 0.020  | 0.019 | 2.60E-01 |

|      |             |   |      |        |       |           |        |       |          |
|------|-------------|---|------|--------|-------|-----------|--------|-------|----------|
| LDLC | rs61988556  | T | 0.91 | 0.022  | 0.004 | 2.11E-09  | -0.018 | 0.014 | 1.90E-01 |
| LDLC | rs6573971   | G | 0.44 | 0.013  | 0.002 | 3.41E-10  | 0.003  | 0.008 | 7.00E-01 |
| LDLC | rs8008068   | A | 0.84 | -0.016 | 0.003 | 3.68E-08  | 0.005  | 0.011 | 6.50E-01 |
| LDLC | rs10851478  | T | 0.58 | 0.012  | 0.002 | 6.01E-09  | 0.003  | 0.008 | 5.30E-01 |
| LDLC | rs112987086 | G | 0.28 | -0.016 | 0.002 | 1.15E-11  | -0.004 | 0.009 | 7.00E-01 |
| LDLC | rs1532085   | A | 0.39 | 0.017  | 0.002 | 8.91E-16  | -0.013 | 0.008 | 8.90E-02 |
| LDLC | rs261334    | G | 0.21 | 0.022  | 0.003 | 8.67E-18  | -0.009 | 0.009 | 3.20E-01 |
| LDLC | rs62011285  | T | 0.66 | -0.012 | 0.002 | 1.59E-08  | 0.015  | 0.008 | 7.60E-02 |
| LDLC | rs72733928  | A | 0.94 | -0.026 | 0.004 | 2.30E-09  | -0.007 | 0.017 | 6.80E-01 |
| LDLC | rs12445804  | G | 0.93 | -0.023 | 0.004 | 7.97E-09  | -0.034 | 0.015 | 2.10E-02 |
| LDLC | rs34042070  | C | 0.81 | -0.049 | 0.003 | 2.23E-73  | -0.010 | 0.010 | 4.30E-01 |
| LDLC | rs3764261   | C | 0.68 | 0.033  | 0.002 | 1.02E-49  | -0.004 | 0.008 | 6.00E-01 |
| LDLC | rs4782568   | C | 0.55 | 0.016  | 0.002 | 5.98E-15  | 0.025  | 0.008 | 1.10E-03 |
| LDLC | rs62033400  | A | 0.61 | 0.014  | 0.002 | 1.15E-11  | -0.025 | 0.008 | 1.40E-03 |
| LDLC | rs7202323   | T | 0.77 | 0.026  | 0.002 | 7.52E-25  | 0.002  | 0.009 | 8.10E-01 |
| LDLC | rs77013160  | G | 0.98 | -0.043 | 0.008 | 1.73E-08  | -0.029 | 0.030 | 2.50E-01 |
| LDLC | rs9929977   | T | 0.63 | -0.017 | 0.002 | 1.03E-14  | -0.008 | 0.008 | 3.30E-01 |
| LDLC | rs12603885  | G | 0.30 | -0.018 | 0.002 | 1.39E-14  | -0.002 | 0.008 | 8.40E-01 |
| LDLC | rs12936113  | T | 0.24 | -0.014 | 0.002 | 2.27E-08  | 0.004  | 0.009 | 6.00E-01 |
| LDLC | rs12948394  | C | 0.52 | 0.018  | 0.002 | 5.13E-18  | -0.012 | 0.008 | 1.10E-01 |
| LDLC | rs1801689   | A | 0.97 | -0.062 | 0.006 | 1.60E-24  | -0.109 | 0.023 | 9.40E-07 |
| LDLC | rs36043200  | G | 0.48 | 0.026  | 0.002 | 1.21E-36  | 0.011  | 0.008 | 1.70E-01 |
| LDLC | rs55714927  | C | 0.81 | 0.026  | 0.003 | 3.66E-23  | 0.004  | 0.010 | 8.10E-01 |
| LDLC | rs72631343  | C | 0.87 | 0.029  | 0.003 | 4.87E-21  | 0.015  | 0.012 | 2.40E-01 |
| LDLC | rs77542162  | A | 0.98 | -0.128 | 0.007 | 5.46E-74  | 0.065  | 0.026 | 1.80E-02 |
| LDLC | rs9894946   | A | 0.16 | 0.018  | 0.003 | 1.48E-09  | 0.020  | 0.011 | 5.80E-02 |
| LDLC | rs7241918   | G | 0.18 | -0.016 | 0.003 | 1.23E-08  | -0.006 | 0.010 | 5.50E-01 |
| LDLC | rs77960347  | A | 0.99 | -0.071 | 0.009 | 7.50E-15  | -0.076 | 0.033 | 2.60E-02 |
| LDLC | rs143020224 | C | 0.88 | 0.169  | 0.003 | 0.00E+00  | -0.019 | 0.012 | 1.40E-01 |
| LDLC | rs1551891   | G | 0.91 | 0.174  | 0.004 | 0.00E+00  | -0.023 | 0.014 | 1.00E-01 |
| LDLC | rs188247550 | C | 0.99 | 0.121  | 0.010 | 9.20E-37  | -0.252 | 0.034 | 3.20E-14 |
| LDLC | rs2021092   | T | 0.81 | 0.016  | 0.003 | 8.71E-10  | -0.012 | 0.010 | 2.20E-01 |
| LDLC | rs204469    | A | 0.04 | -0.029 | 0.005 | 8.59E-09  | 0.056  | 0.019 | 2.80E-03 |
| LDLC | rs2738447   | A | 0.41 | -0.042 | 0.002 | 3.47E-89  | -0.007 | 0.008 | 3.50E-01 |
| LDLC | rs35081008  | C | 0.85 | 0.032  | 0.003 | 1.05E-27  | -0.018 | 0.011 | 1.20E-01 |
| LDLC | rs4452060   | C | 0.58 | -0.083 | 0.002 | 0.00E+00  | 0.017  | 0.008 | 3.60E-02 |
| LDLC | rs4808360   | T | 0.49 | -0.013 | 0.002 | 8.12E-10  | 0.005  | 0.008 | 6.40E-01 |
| LDLC | rs516316    | G | 0.49 | -0.030 | 0.002 | 9.52E-47  | -0.013 | 0.008 | 1.10E-01 |
| LDLC | rs549956721 | A | 0.97 | 0.042  | 0.007 | 1.80E-10  | 0.015  | 0.024 | 5.80E-01 |
| LDLC | rs56113850  | T | 0.42 | -0.013 | 0.002 | 1.84E-10  | -0.012 | 0.008 | 1.40E-01 |
| LDLC | rs62116889  | T | 0.93 | 0.050  | 0.004 | 2.36E-33  | 0.001  | 0.016 | 8.10E-01 |
| LDLC | rs62118464  | G | 0.88 | -0.028 | 0.003 | 4.88E-17  | 0.010  | 0.012 | 3.30E-01 |
| LDLC | rs62120394  | G | 0.71 | -0.016 | 0.002 | 5.49E-12  | -0.039 | 0.009 | 4.40E-06 |
| LDLC | rs6857      | C | 0.83 | -0.158 | 0.003 | 0.00E+00  | 0.105  | 0.010 | 2.10E-24 |
| LDLC | rs8101801   | C | 0.96 | 0.045  | 0.006 | 6.16E-16  | -0.015 | 0.021 | 5.20E-01 |
| LDLC | rs8107974   | A | 0.92 | 0.105  | 0.004 | 1.77E-158 | -0.288 | 0.015 | 6.10E-85 |
| LDLC | rs1800961   | C | 0.97 | 0.060  | 0.006 | 4.04E-23  | -0.008 | 0.022 | 6.20E-01 |
| LDLC | rs1883711   | G | 0.97 | -0.103 | 0.006 | 1.37E-63  | -0.068 | 0.023 | 1.80E-03 |
| LDLC | rs224424    | A | 0.79 | 0.021  | 0.003 | 2.58E-16  | -0.013 | 0.010 | 2.00E-01 |
| LDLC | rs2256814   | G | 0.80 | -0.015 | 0.003 | 6.71E-09  | 0.015  | 0.010 | 8.00E-02 |
| LDLC | rs2618566   | G | 0.34 | 0.025  | 0.002 | 1.20E-29  | -0.016 | 0.008 | 7.50E-02 |
| LDLC | rs438568    | A | 0.39 | -0.013 | 0.002 | 4.03E-09  | 0.016  | 0.008 | 6.10E-02 |
| LDLC | rs6050463   | G | 0.51 | -0.013 | 0.002 | 1.82E-09  | -0.024 | 0.008 | 9.70E-04 |
| LDLC | rs6073958   | T | 0.80 | -0.017 | 0.003 | 2.61E-11  | -0.001 | 0.010 | 9.50E-01 |
| LDLC | rs6090101   | G | 0.80 | -0.018 | 0.003 | 3.06E-11  | -0.002 | 0.010 | 7.10E-01 |
| LDLC | rs6093446   | G | 0.71 | -0.022 | 0.002 | 7.41E-22  | -0.003 | 0.009 | 7.50E-01 |

|      |             |   |      |        |       |          |        |       |          |
|------|-------------|---|------|--------|-------|----------|--------|-------|----------|
| LDLC | rs61433703  | G | 0.84 | -0.016 | 0.003 | 2.67E-08 | 0.015  | 0.011 | 2.50E-01 |
| LDLC | rs73075609  | C | 0.97 | -0.037 | 0.007 | 1.63E-08 | 0.031  | 0.024 | 1.80E-01 |
| LDLC | rs4818025   | A | 0.43 | -0.014 | 0.002 | 8.67E-11 | -0.003 | 0.008 | 7.90E-01 |
| LDLC | rs12162782  | T | 0.66 | -0.013 | 0.002 | 4.35E-09 | 0.020  | 0.008 | 1.00E-02 |
| LDLC | rs960596    | C | 0.66 | -0.013 | 0.002 | 1.33E-09 | -0.022 | 0.008 | 7.70E-03 |
| SBP  | rs1043069   | T | 0.62 | 0.016  | 0.003 | 5.14E-15 | 0.002  | 0.008 | 8.50E-01 |
| SBP  | rs10923038  | A | 0.61 | -0.015 | 0.003 | 2.57E-10 | -0.002 | 0.008 | 7.00E-01 |
| SBP  | rs11210029  | A | 0.63 | 0.021  | 0.003 | 5.14E-09 | 0.010  | 0.008 | 1.70E-01 |
| SBP  | rs11579440  | T | 0.85 | -0.016 | 0.002 | 9.45E-10 | 0.005  | 0.011 | 7.70E-01 |
| SBP  | rs12042924  | T | 0.53 | -0.017 | 0.003 | 6.22E-11 | -0.002 | 0.008 | 6.70E-01 |
| SBP  | rs17396055  | A | 0.33 | 0.015  | 0.003 | 6.08E-11 | -0.001 | 0.008 | 9.50E-01 |
| SBP  | rs260508    | T | 0.61 | 0.018  | 0.003 | 5.02E-09 | 0.004  | 0.008 | 7.30E-01 |
| SBP  | rs2807337   | T | 0.37 | -0.035 | 0.006 | 3.49E-12 | -0.004 | 0.008 | 5.70E-01 |
| SBP  | rs33996239  | T | 0.06 | 0.030  | 0.005 | 1.70E-10 | -0.031 | 0.016 | 4.60E-02 |
| SBP  | rs3737801   | C | 0.91 | 0.019  | 0.003 | 2.99E-09 | -0.023 | 0.015 | 9.30E-02 |
| SBP  | rs4651224   | T | 0.45 | 0.030  | 0.004 | 7.49E-15 | -0.004 | 0.008 | 6.00E-01 |
| SBP  | rs4926499   | C | 0.82 | 0.020  | 0.003 | 2.83E-15 | -0.011 | 0.010 | 2.90E-01 |
| SBP  | rs7514579   | A | 0.77 | 0.020  | 0.003 | 1.82E-11 | -0.010 | 0.009 | 2.20E-01 |
| SBP  | rs7555285   | C | 0.80 | -0.024 | 0.004 | 1.11E-10 | 0.016  | 0.010 | 6.00E-02 |
| SBP  | rs76719272  | T | 0.13 | 0.059  | 0.008 | 1.93E-10 | 0.005  | 0.012 | 4.20E-01 |
| SBP  | rs79598313  | T | 0.03 | -0.023 | 0.003 | 1.82E-13 | 0.033  | 0.025 | 1.70E-01 |
| SBP  | rs839755    | A | 0.62 | 0.014  | 0.003 | 1.31E-19 | -0.004 | 0.008 | 6.00E-01 |
| SBP  | rs10189186  | A | 0.53 | -0.023 | 0.003 | 1.28E-08 | -0.005 | 0.008 | 5.00E-01 |
| SBP  | rs1044822   | T | 0.15 | -0.020 | 0.003 | 6.26E-11 | -0.014 | 0.011 | 9.80E-02 |
| SBP  | rs1047891   | A | 0.32 | -0.015 | 0.003 | 9.43E-14 | -0.004 | 0.008 | 7.40E-01 |
| SBP  | rs11694601  | A | 0.59 | -0.018 | 0.003 | 2.81E-09 | -0.009 | 0.008 | 2.50E-01 |
| SBP  | rs12694277  | T | 0.30 | 0.055  | 0.008 | 7.37E-11 | -0.011 | 0.009 | 1.90E-01 |
| SBP  | rs139354822 | T | 0.97 | 0.015  | 0.003 | 1.03E-12 | -0.014 | 0.024 | 6.70E-01 |
| SBP  | rs1837164   | A | 0.37 | -0.025 | 0.005 | 3.28E-09 | -0.014 | 0.008 | 1.10E-01 |
| SBP  | rs2059752   | T | 0.90 | 0.019  | 0.003 | 2.41E-08 | 0.011  | 0.014 | 5.20E-01 |
| SBP  | rs2300481   | T | 0.39 | -0.019 | 0.003 | 8.17E-15 | -0.002 | 0.008 | 6.00E-01 |
| SBP  | rs28377357  | A | 0.29 | -0.019 | 0.003 | 3.09E-12 | -0.031 | 0.009 | 5.80E-04 |
| SBP  | rs28558491  | T | 0.74 | 0.019  | 0.003 | 1.57E-11 | 0.003  | 0.009 | 7.60E-01 |
| SBP  | rs2920899   | T | 0.79 | 0.016  | 0.002 | 1.14E-09 | 0.002  | 0.010 | 8.40E-01 |
| SBP  | rs296797    | T | 0.41 | -0.022 | 0.003 | 3.73E-11 | -0.005 | 0.008 | 5.30E-01 |
| SBP  | rs35590893  | A | 0.27 | -0.024 | 0.004 | 5.06E-15 | -0.007 | 0.009 | 3.70E-01 |
| SBP  | rs55732192  | T | 0.09 | 0.017  | 0.003 | 1.53E-08 | -0.017 | 0.013 | 1.40E-01 |
| SBP  | rs6545155   | T | 0.78 | -0.016 | 0.003 | 9.91E-09 | -0.002 | 0.009 | 9.20E-01 |
| SBP  | rs6712203   | T | 0.37 | 0.023  | 0.004 | 9.27E-10 | -0.030 | 0.008 | 1.60E-04 |
| SBP  | rs6723509   | T | 0.86 | 0.017  | 0.003 | 2.24E-11 | 0.002  | 0.011 | 8.90E-01 |
| SBP  | rs6739913   | A | 0.28 | 0.020  | 0.003 | 6.38E-10 | 0.004  | 0.009 | 7.70E-01 |
| SBP  | rs67720684  | A | 0.24 | 0.022  | 0.003 | 2.44E-12 | -0.004 | 0.009 | 7.00E-01 |
| SBP  | rs72816333  | A | 0.83 | 0.021  | 0.004 | 5.64E-12 | -0.010 | 0.010 | 3.50E-01 |
| SBP  | rs72844590  | T | 0.15 | 0.022  | 0.003 | 4.88E-09 | -0.002 | 0.011 | 7.80E-01 |
| SBP  | rs72847885  | A | 0.66 | -0.026 | 0.004 | 4.61E-17 | 0.000  | 0.008 | 8.70E-01 |
| SBP  | rs79523138  | A | 0.88 | -0.061 | 0.011 | 3.96E-11 | -0.003 | 0.012 | 6.20E-01 |
| SBP  | rs111464338 | T | 0.98 | 0.021  | 0.003 | 1.89E-08 | -0.007 | 0.034 | 7.40E-01 |
| SBP  | rs12638085  | A | 0.35 | 0.023  | 0.003 | 8.60E-16 | 0.006  | 0.008 | 3.60E-01 |
| SBP  | rs1375564   | T | 0.64 | -0.022 | 0.004 | 5.57E-20 | 0.002  | 0.008 | 7.20E-01 |
| SBP  | rs1882289   | A | 0.88 | -0.078 | 0.012 | 1.22E-08 | 0.006  | 0.012 | 5.40E-01 |
| SBP  | rs189267552 | A | 0.01 | -0.019 | 0.002 | 1.16E-11 | 0.016  | 0.035 | 6.50E-01 |
| SBP  | rs262986    | A | 0.47 | -0.016 | 0.003 | 7.22E-14 | -0.018 | 0.008 | 1.00E-02 |
| SBP  | rs3729931   | A | 0.36 | -0.020 | 0.003 | 5.59E-10 | -0.011 | 0.008 | 1.10E-01 |
| SBP  | rs4499560   | A | 0.32 | 0.042  | 0.006 | 3.43E-14 | -0.021 | 0.008 | 1.20E-02 |
| SBP  | rs62271373  | A | 0.06 | 0.021  | 0.002 | 2.38E-14 | 0.046  | 0.017 | 6.40E-03 |
| SBP  | rs6438857   | T | 0.57 | 0.025  | 0.004 | 5.77E-18 | 0.004  | 0.008 | 7.80E-01 |

|     |            |   |      |        |       |          |        |       |          |
|-----|------------|---|------|--------|-------|----------|--------|-------|----------|
| SBP | rs6774721  | C | 0.88 | 0.026  | 0.004 | 2.98E-10 | 0.002  | 0.011 | 7.40E-01 |
| SBP | rs6788984  | A | 0.86 | -0.021 | 0.003 | 4.28E-13 | -0.023 | 0.011 | 4.80E-02 |
| SBP | rs78151625 | T | 0.83 | 0.016  | 0.002 | 1.68E-10 | 0.012  | 0.011 | 3.00E-01 |
| SBP | rs863930   | A | 0.54 | -0.014 | 0.002 | 2.95E-11 | 0.004  | 0.008 | 4.90E-01 |
| SBP | rs893982   | C | 0.40 | 0.018  | 0.003 | 2.82E-08 | -0.006 | 0.008 | 3.60E-01 |
| SBP | rs9311344  | A | 0.18 | 0.014  | 0.002 | 1.13E-08 | 0.005  | 0.010 | 7.10E-01 |
| SBP | rs9842387  | T | 0.46 | -0.015 | 0.003 | 1.82E-08 | -0.003 | 0.008 | 8.70E-01 |
| SBP | rs9869437  | A | 0.35 | -0.017 | 0.002 | 3.65E-09 | 0.002  | 0.008 | 7.40E-01 |
| SBP | rs9875380  | T | 0.46 | 0.019  | 0.002 | 1.60E-11 | 0.008  | 0.008 | 3.60E-01 |
| SBP | rs10008637 | T | 0.54 | -0.022 | 0.003 | 1.35E-14 | 0.016  | 0.008 | 2.60E-02 |
| SBP | rs12511987 | T | 0.82 | 0.025  | 0.003 | 2.64E-11 | -0.012 | 0.010 | 4.40E-01 |
| SBP | rs13149209 | T | 0.78 | -0.018 | 0.003 | 1.81E-17 | -0.004 | 0.009 | 7.70E-01 |
| SBP | rs1347345  | A | 0.62 | 0.029  | 0.003 | 1.41E-12 | 0.002  | 0.008 | 7.80E-01 |
| SBP | rs17035181 | T | 0.85 | -0.023 | 0.003 | 2.37E-17 | 0.014  | 0.011 | 2.00E-01 |
| SBP | rs231708   | C | 0.69 | -0.026 | 0.003 | 5.61E-18 | 0.019  | 0.008 | 3.70E-02 |
| SBP | rs2610990  | A | 0.26 | -0.017 | 0.003 | 3.95E-20 | -0.025 | 0.009 | 4.50E-03 |
| SBP | rs6823767  | T | 0.72 | -0.023 | 0.003 | 2.29E-10 | -0.010 | 0.009 | 1.80E-01 |
| SBP | rs72719160 | A | 0.68 | 0.024  | 0.003 | 5.00E-19 | 0.000  | 0.008 | 1.00E+00 |
| SBP | rs7439567  | T | 0.42 | -0.038 | 0.007 | 6.44E-21 | -0.011 | 0.008 | 1.40E-01 |
| SBP | rs78231605 | T | 0.04 | 0.027  | 0.003 | 4.79E-08 | -0.006 | 0.020 | 7.90E-01 |
| SBP | rs10069690 | T | 0.26 | -0.025 | 0.004 | 4.06E-21 | -0.014 | 0.009 | 1.10E-01 |
| SBP | rs12153395 | A | 0.11 | 0.020  | 0.003 | 3.20E-10 | -0.018 | 0.012 | 1.10E-01 |
| SBP | rs13179413 | T | 0.28 | 0.023  | 0.003 | 5.99E-13 | 0.022  | 0.009 | 5.80E-03 |
| SBP | rs1694068  | A | 0.61 | 0.022  | 0.003 | 1.18E-20 | 0.018  | 0.008 | 2.40E-02 |
| SBP | rs246973   | T | 0.29 | -0.015 | 0.002 | 6.92E-16 | -0.006 | 0.009 | 3.90E-01 |
| SBP | rs3121685  | T | 0.48 | 0.014  | 0.003 | 2.02E-09 | 0.000  | 0.008 | 9.90E-01 |
| SBP | rs4957026  | A | 0.34 | 0.026  | 0.004 | 2.67E-08 | -0.009 | 0.008 | 3.70E-01 |
| SBP | rs62373688 | A | 0.13 | 0.019  | 0.002 | 5.32E-12 | -0.014 | 0.011 | 2.40E-01 |
| SBP | rs702395   | T | 0.44 | -0.025 | 0.003 | 8.21E-15 | -0.002 | 0.008 | 7.60E-01 |
| SBP | rs709668   | A | 0.20 | -0.017 | 0.003 | 1.22E-16 | 0.003  | 0.010 | 6.50E-01 |
| SBP | rs74774746 | C | 0.26 | 0.020  | 0.002 | 2.20E-09 | 0.007  | 0.009 | 4.70E-01 |
| SBP | rs10782230 | A | 0.48 | 0.014  | 0.003 | 5.07E-16 | 0.001  | 0.008 | 8.80E-01 |
| SBP | rs12661604 | A | 0.40 | 0.015  | 0.003 | 4.20E-08 | -0.007 | 0.008 | 3.10E-01 |
| SBP | rs179972   | T | 0.43 | -0.018 | 0.003 | 1.15E-08 | 0.012  | 0.008 | 1.20E-01 |
| SBP | rs2395622  | T | 0.82 | -0.019 | 0.003 | 3.26E-08 | 0.001  | 0.010 | 9.40E-01 |
| SBP | rs2498586  | T | 0.17 | 0.019  | 0.003 | 9.66E-09 | -0.003 | 0.010 | 7.30E-01 |
| SBP | rs2745599  | A | 0.55 | -0.018 | 0.003 | 4.65E-14 | -0.005 | 0.008 | 6.10E-01 |
| SBP | rs7763294  | T | 0.32 | 0.014  | 0.002 | 6.92E-12 | -0.001 | 0.008 | 9.20E-01 |
| SBP | rs7765526  | A | 0.47 | 0.023  | 0.003 | 6.66E-09 | -0.001 | 0.008 | 9.50E-01 |
| SBP | rs9368222  | A | 0.27 | 0.016  | 0.003 | 3.50E-17 | 0.001  | 0.009 | 8.50E-01 |
| SBP | rs9401090  | T | 0.75 | 0.021  | 0.003 | 9.25E-09 | -0.016 | 0.009 | 6.20E-02 |
| SBP | rs9885632  | T | 0.73 | 0.014  | 0.003 | 4.92E-14 | -0.002 | 0.009 | 7.50E-01 |
| SBP | rs1011390  | T | 0.39 | 0.030  | 0.004 | 1.56E-08 | 0.005  | 0.008 | 5.00E-01 |
| SBP | rs10233127 | A | 0.11 | 0.016  | 0.002 | 1.40E-13 | -0.010 | 0.013 | 4.50E-01 |
| SBP | rs10274928 | A | 0.49 | 0.017  | 0.003 | 8.14E-11 | 0.024  | 0.008 | 2.70E-03 |
| SBP | rs11771693 | A | 0.67 | 0.015  | 0.003 | 2.73E-10 | -0.005 | 0.008 | 4.80E-01 |
| SBP | rs12703989 | A | 0.49 | 0.017  | 0.003 | 1.17E-09 | 0.014  | 0.008 | 6.60E-02 |
| SBP | rs1870735  | C | 0.45 | -0.022 | 0.002 | 1.78E-11 | 0.007  | 0.008 | 2.40E-01 |
| SBP | rs34072724 | A | 0.49 | -0.015 | 0.003 | 3.94E-19 | -0.012 | 0.008 | 7.00E-02 |
| SBP | rs3807925  | A | 0.65 | 0.015  | 0.003 | 4.02E-09 | -0.003 | 0.008 | 6.90E-01 |
| SBP | rs6466878  | T | 0.32 | 0.016  | 0.003 | 7.74E-09 | -0.008 | 0.008 | 3.00E-01 |
| SBP | rs6593297  | A | 0.30 | -0.015 | 0.003 | 7.92E-09 | -0.022 | 0.009 | 1.60E-02 |
| SBP | rs6953231  | T | 0.27 | -0.020 | 0.003 | 3.26E-08 | -0.010 | 0.009 | 2.40E-01 |
| SBP | rs6959688  | A | 0.60 | -0.018 | 0.003 | 2.51E-15 | 0.005  | 0.008 | 5.10E-01 |
| SBP | rs6963105  | A | 0.43 | -0.020 | 0.003 | 1.34E-11 | -0.021 | 0.008 | 4.50E-03 |
| SBP | rs848445   | T | 0.28 | 0.017  | 0.003 | 6.83E-13 | -0.004 | 0.009 | 7.20E-01 |

|     |             |   |      |        |       |          |        |       |          |
|-----|-------------|---|------|--------|-------|----------|--------|-------|----------|
| SBP | rs13253358  | T | 0.30 | 0.017  | 0.003 | 6.32E-11 | 0.003  | 0.008 | 7.00E-01 |
| SBP | rs1405349   | T | 0.72 | -0.039 | 0.006 | 3.01E-10 | 0.023  | 0.009 | 3.30E-03 |
| SBP | rs142449193 | T | 0.05 | 0.027  | 0.003 | 3.53E-10 | -0.023 | 0.019 | 3.70E-01 |
| SBP | rs1906672   | A | 0.23 | 0.024  | 0.003 | 1.06E-20 | 0.002  | 0.009 | 6.50E-01 |
| SBP | rs1986971   | A | 0.70 | 0.019  | 0.003 | 4.13E-18 | 0.004  | 0.009 | 5.20E-01 |
| SBP | rs2354862   | A | 0.64 | -0.014 | 0.003 | 7.74E-14 | -0.001 | 0.008 | 8.50E-01 |
| SBP | rs2978398   | A | 0.42 | 0.016  | 0.003 | 3.31E-08 | -0.001 | 0.008 | 9.70E-01 |
| SBP | rs2979470   | T | 0.49 | 0.017  | 0.002 | 9.67E-11 | -0.006 | 0.008 | 5.00E-01 |
| SBP | rs4129585   | A | 0.44 | 0.018  | 0.003 | 1.16E-12 | -0.002 | 0.008 | 8.10E-01 |
| SBP | rs4598218   | T | 0.61 | 0.030  | 0.003 | 1.50E-12 | -0.003 | 0.008 | 4.60E-01 |
| SBP | rs4873492   | T | 0.18 | 0.018  | 0.003 | 1.17E-19 | -0.002 | 0.010 | 9.00E-01 |
| SBP | rs4875958   | A | 0.71 | 0.015  | 0.003 | 7.93E-11 | -0.011 | 0.009 | 2.20E-01 |
| SBP | rs61040371  | T | 0.63 | 0.023  | 0.003 | 3.61E-09 | -0.004 | 0.008 | 5.80E-01 |
| SBP | rs62523863  | A | 0.22 | -0.024 | 0.003 | 5.22E-15 | 0.019  | 0.009 | 4.50E-02 |
| SBP | rs72688070  | T | 0.17 | -0.015 | 0.003 | 1.44E-13 | -0.014 | 0.010 | 1.80E-01 |
| SBP | rs10820855  | T | 0.68 | 0.020  | 0.003 | 2.59E-08 | 0.000  | 0.008 | 9.80E-01 |
| SBP | rs1332813   | T | 0.35 | -0.017 | 0.003 | 3.28E-14 | -0.003 | 0.008 | 6.60E-01 |
| SBP | rs184457    | A | 0.30 | -0.018 | 0.003 | 1.07E-09 | -0.010 | 0.008 | 1.30E-01 |
| SBP | rs1891730   | T | 0.62 | -0.022 | 0.003 | 3.11E-12 | -0.001 | 0.008 | 9.10E-01 |
| SBP | rs28558845  | C | 0.16 | -0.017 | 0.003 | 1.27E-10 | -0.008 | 0.011 | 5.10E-01 |
| SBP | rs60191654  | A | 0.81 | -0.024 | 0.002 | 3.20E-08 | -0.008 | 0.010 | 4.80E-01 |
| SBP | rs7023828   | T | 0.42 | -0.018 | 0.003 | 1.33E-22 | 0.000  | 0.008 | 8.00E-01 |
| SBP | rs7045409   | A | 0.37 | -0.017 | 0.003 | 8.74E-13 | -0.007 | 0.008 | 4.00E-01 |
| SBP | rs7874646   | T | 0.20 | 0.024  | 0.004 | 1.79E-08 | -0.003 | 0.010 | 7.60E-01 |
| SBP | rs11187142  | T | 0.11 | -0.018 | 0.003 | 1.91E-09 | -0.006 | 0.013 | 7.20E-01 |
| SBP | rs11197813  | A | 0.70 | -0.030 | 0.005 | 1.82E-11 | 0.012  | 0.008 | 2.00E-01 |
| SBP | rs11252324  | T | 0.08 | -0.026 | 0.003 | 6.02E-11 | -0.009 | 0.015 | 5.80E-01 |
| SBP | rs1133400   | A | 0.79 | 0.023  | 0.003 | 7.70E-18 | 0.003  | 0.009 | 7.00E-01 |
| SBP | rs11592107  | A | 0.31 | -0.036 | 0.005 | 2.44E-18 | 0.011  | 0.008 | 2.00E-01 |
| SBP | rs12572586  | T | 0.94 | -0.027 | 0.004 | 1.76E-12 | -0.014 | 0.016 | 2.80E-01 |
| SBP | rs34130368  | T | 0.12 | 0.019  | 0.002 | 5.55E-12 | 0.005  | 0.012 | 8.70E-01 |
| SBP | rs3802517   | A | 0.46 | 0.017  | 0.003 | 6.27E-15 | 0.003  | 0.008 | 7.30E-01 |
| SBP | rs3858217   | C | 0.26 | -0.021 | 0.004 | 3.32E-09 | -0.015 | 0.009 | 1.30E-01 |
| SBP | rs56085433  | A | 0.14 | 0.020  | 0.004 | 6.19E-09 | -0.001 | 0.011 | 8.90E-01 |
| SBP | rs56352451  | T | 0.13 | -0.018 | 0.003 | 2.63E-08 | -0.005 | 0.011 | 6.00E-01 |
| SBP | rs72799495  | A | 0.16 | -0.028 | 0.004 | 2.99E-08 | 0.003  | 0.010 | 7.30E-01 |
| SBP | rs72834453  | T | 0.88 | 0.047  | 0.006 | 7.56E-13 | 0.012  | 0.012 | 3.90E-01 |
| SBP | rs77413490  | T | 0.04 | 0.019  | 0.003 | 4.16E-14 | -0.009 | 0.020 | 5.20E-01 |
| SBP | rs7912283   | A | 0.35 | -0.018 | 0.003 | 6.29E-14 | -0.005 | 0.008 | 5.20E-01 |
| SBP | rs10743086  | A | 0.21 | 0.031  | 0.004 | 1.48E-09 | 0.018  | 0.010 | 3.80E-02 |
| SBP | rs1076485   | T | 0.14 | 0.017  | 0.003 | 1.09E-17 | 0.003  | 0.012 | 8.90E-01 |
| SBP | rs10766533  | A | 0.71 | -0.019 | 0.003 | 9.28E-10 | 0.010  | 0.009 | 2.30E-01 |
| SBP | rs11031051  | A | 0.69 | 0.027  | 0.005 | 6.33E-13 | 0.011  | 0.008 | 2.00E-01 |
| SBP | rs190194639 | T | 0.08 | -0.029 | 0.002 | 4.42E-09 | 0.000  | 0.015 | 9.70E-01 |
| SBP | rs4754196   | A | 0.52 | 0.021  | 0.003 | 5.48E-32 | -0.006 | 0.008 | 5.40E-01 |
| SBP | rs4980515   | T | 0.50 | 0.020  | 0.003 | 9.51E-17 | 0.004  | 0.008 | 7.10E-01 |
| SBP | rs67976715  | C | 0.23 | -0.016 | 0.003 | 2.37E-11 | 0.010  | 0.009 | 2.20E-01 |
| SBP | rs7128707   | A | 0.26 | 0.039  | 0.004 | 3.07E-09 | -0.005 | 0.009 | 5.00E-01 |
| SBP | rs75905900  | A | 0.87 | 0.020  | 0.003 | 6.77E-26 | -0.002 | 0.011 | 8.80E-01 |
| SBP | rs871004    | A | 0.35 | -0.035 | 0.004 | 1.18E-14 | -0.019 | 0.008 | 1.90E-02 |
| SBP | rs10437954  | A | 0.90 | 0.025  | 0.003 | 2.69E-16 | -0.009 | 0.013 | 5.50E-01 |
| SBP | rs10858966  | C | 0.29 | 0.046  | 0.006 | 4.74E-20 | 0.017  | 0.009 | 7.80E-02 |
| SBP | rs11112548  | A | 0.95 | -0.019 | 0.003 | 1.40E-13 | -0.031 | 0.019 | 9.50E-02 |
| SBP | rs11571376  | C | 0.70 | 0.022  | 0.004 | 3.60E-12 | 0.005  | 0.009 | 4.20E-01 |
| SBP | rs117206641 | A | 0.14 | -0.023 | 0.003 | 1.52E-09 | 0.015  | 0.013 | 3.10E-01 |
| SBP | rs2024385   | A | 0.42 | 0.018  | 0.003 | 1.03E-19 | 0.013  | 0.008 | 9.40E-02 |

|     |             |   |      |        |       |          |        |       |          |
|-----|-------------|---|------|--------|-------|----------|--------|-------|----------|
| SBP | rs4143175   | T | 0.24 | -0.022 | 0.003 | 2.96E-10 | -0.004 | 0.009 | 6.60E-01 |
| SBP | rs5742643   | A | 0.25 | -0.020 | 0.003 | 2.21E-15 | -0.017 | 0.009 | 4.30E-02 |
| SBP | rs78998485  | C | 0.75 | -0.020 | 0.003 | 2.93E-13 | -0.001 | 0.009 | 9.10E-01 |
| SBP | rs7963801   | T | 0.41 | 0.016  | 0.003 | 2.41E-15 | -0.018 | 0.008 | 1.60E-02 |
| SBP | rs7976167   | T | 0.69 | 0.016  | 0.003 | 7.37E-10 | -0.006 | 0.008 | 3.90E-01 |
| SBP | rs1331012   | T | 0.27 | -0.015 | 0.003 | 2.95E-09 | -0.004 | 0.009 | 5.60E-01 |
| SBP | rs17245822  | A | 0.63 | 0.014  | 0.003 | 3.66E-09 | 0.002  | 0.008 | 8.30E-01 |
| SBP | rs2152258   | T | 0.35 | 0.023  | 0.003 | 2.47E-08 | 0.006  | 0.008 | 4.30E-01 |
| SBP | rs606950    | A | 0.62 | -0.026 | 0.004 | 4.09E-20 | -0.004 | 0.008 | 5.60E-01 |
| SBP | rs73187288  | A | 0.89 | 0.039  | 0.003 | 1.61E-10 | 0.000  | 0.012 | 9.90E-01 |
| SBP | rs7331680   | T | 0.15 | -0.048 | 0.006 | 1.34E-29 | 0.012  | 0.011 | 1.40E-01 |
| SBP | rs78474310  | A | 0.96 | 0.015  | 0.002 | 8.51E-16 | -0.009 | 0.018 | 5.90E-01 |
| SBP | rs7988232   | A | 0.42 | 0.022  | 0.003 | 2.79E-09 | 0.014  | 0.008 | 8.60E-02 |
| SBP | rs912434    | T | 0.76 | -0.023 | 0.004 | 6.64E-14 | -0.014 | 0.009 | 1.10E-01 |
| SBP | rs9507885   | T | 0.11 | -0.019 | 0.003 | 3.70E-09 | 0.009  | 0.013 | 4.00E-01 |
| SBP | rs9526707   | A | 0.32 | 0.027  | 0.002 | 2.06E-13 | 0.004  | 0.008 | 5.70E-01 |
| SBP | rs9532243   | A | 0.48 | 0.018  | 0.002 | 7.31E-29 | -0.014 | 0.008 | 6.50E-02 |
| SBP | rs11159091  | A | 0.46 | 0.020  | 0.003 | 3.13E-13 | 0.005  | 0.008 | 5.30E-01 |
| SBP | rs11623535  | A | 0.74 | 0.016  | 0.003 | 2.89E-13 | 0.008  | 0.009 | 4.40E-01 |
| SBP | rs17115145  | T | 0.40 | -0.016 | 0.002 | 3.47E-10 | 0.016  | 0.008 | 5.20E-02 |
| SBP | rs34983854  | A | 0.61 | 0.098  | 0.009 | 6.93E-11 | 0.020  | 0.008 | 1.90E-02 |
| SBP | rs72683923  | T | 0.98 | -0.034 | 0.004 | 1.33E-25 | 0.066  | 0.027 | 1.50E-02 |
| SBP | rs8014182   | T | 0.14 | 0.020  | 0.002 | 4.96E-21 | 0.002  | 0.012 | 9.70E-01 |
| SBP | rs11629850  | A | 0.53 | 0.021  | 0.002 | 2.93E-16 | -0.004 | 0.008 | 4.50E-01 |
| SBP | rs11632436  | C | 0.50 | 0.023  | 0.003 | 4.79E-17 | -0.004 | 0.008 | 6.30E-01 |
| SBP | rs11634028  | A | 0.21 | 0.014  | 0.002 | 8.96E-13 | -0.013 | 0.009 | 2.20E-01 |
| SBP | rs12595031  | T | 0.58 | 0.015  | 0.003 | 2.03E-08 | -0.007 | 0.008 | 4.90E-01 |
| SBP | rs12901664  | T | 0.35 | 0.026  | 0.003 | 3.26E-09 | 0.010  | 0.008 | 2.80E-01 |
| SBP | rs3743157   | A | 0.17 | 0.014  | 0.003 | 1.18E-15 | 0.000  | 0.010 | 9.30E-01 |
| SBP | rs4775376   | T | 0.38 | -0.025 | 0.003 | 4.35E-08 | -0.002 | 0.008 | 8.80E-01 |
| SBP | rs4965529   | T | 0.17 | 0.017  | 0.003 | 1.55E-14 | 0.006  | 0.010 | 5.90E-01 |
| SBP | rs2060664   | T | 0.75 | -0.020 | 0.003 | 1.45E-09 | -0.003 | 0.009 | 5.50E-01 |
| SBP | rs2379829   | C | 0.73 | -0.023 | 0.003 | 5.90E-13 | 0.007  | 0.009 | 4.00E-01 |
| SBP | rs34941092  | A | 0.15 | -0.016 | 0.003 | 1.44E-11 | 0.004  | 0.011 | 6.60E-01 |
| SBP | rs35450617  | T | 0.70 | 0.016  | 0.003 | 2.21E-09 | 0.001  | 0.009 | 9.40E-01 |
| SBP | rs6540125   | T | 0.35 | -0.018 | 0.003 | 4.50E-10 | 0.003  | 0.008 | 6.60E-01 |
| SBP | rs7187540   | A | 0.34 | -0.023 | 0.003 | 1.15E-10 | 0.012  | 0.008 | 1.40E-01 |
| SBP | rs1036902   | T | 0.84 | 0.022  | 0.004 | 1.76E-11 | -0.010 | 0.011 | 3.10E-01 |
| SBP | rs112260610 | T | 0.14 | -0.017 | 0.003 | 3.85E-10 | -0.006 | 0.011 | 6.00E-01 |
| SBP | rs112280096 | A | 0.36 | 0.019  | 0.003 | 1.03E-10 | 0.006  | 0.008 | 5.70E-01 |
| SBP | rs1551355   | T | 0.23 | -0.021 | 0.003 | 1.97E-11 | -0.006 | 0.009 | 5.20E-01 |
| SBP | rs34430710  | A | 0.68 | 0.026  | 0.003 | 4.61E-15 | -0.004 | 0.008 | 6.30E-01 |
| SBP | rs4480845   | T | 0.37 | 0.023  | 0.002 | 8.46E-24 | 0.011  | 0.008 | 2.00E-01 |
| SBP | rs4925159   | A | 0.43 | -0.024 | 0.003 | 2.59E-20 | 0.005  | 0.008 | 5.50E-01 |
| SBP | rs6504213   | T | 0.42 | -0.014 | 0.002 | 7.24E-22 | 0.002  | 0.008 | 8.10E-01 |
| SBP | rs7218708   | A | 0.49 | 0.019  | 0.002 | 8.07E-09 | -0.008 | 0.008 | 2.30E-01 |
| SBP | rs9302885   | A | 0.44 | -0.015 | 0.003 | 2.04E-15 | 0.003  | 0.008 | 5.60E-01 |
| SBP | rs9899540   | A | 0.61 | -0.023 | 0.003 | 6.29E-09 | 0.004  | 0.008 | 7.00E-01 |
| SBP | rs10048404  | T | 0.37 | 0.021  | 0.003 | 3.36E-17 | 0.009  | 0.008 | 3.60E-01 |
| SBP | rs10460108  | A | 0.48 | -0.015 | 0.003 | 5.84E-13 | 0.003  | 0.008 | 8.00E-01 |
| SBP | rs1154214   | T | 0.40 | -0.022 | 0.003 | 4.09E-09 | -0.018 | 0.008 | 5.60E-02 |
| SBP | rs11876341  | A | 0.69 | 0.020  | 0.003 | 1.71E-16 | -0.008 | 0.008 | 3.00E-01 |
| SBP | rs12454712  | T | 0.62 | -0.031 | 0.003 | 4.56E-15 | 0.016  | 0.008 | 5.70E-02 |
| SBP | rs34413141  | A | 0.18 | -0.016 | 0.003 | 2.33E-21 | 0.002  | 0.010 | 9.80E-01 |
| SBP | rs62082230  | A | 0.28 | -0.024 | 0.003 | 5.32E-09 | 0.011  | 0.009 | 1.50E-01 |
| SBP | rs10409243  | T | 0.58 | 0.014  | 0.003 | 3.96E-21 | -0.019 | 0.008 | 1.40E-02 |

|                  |             |   |      |        |       |          |        |       |          |
|------------------|-------------|---|------|--------|-------|----------|--------|-------|----------|
| SBP              | rs1236093   | T | 0.40 | -0.066 | 0.010 | 4.81E-08 | 0.011  | 0.008 | 1.50E-01 |
| SBP              | rs138877676 | T | 0.02 | -0.023 | 0.002 | 2.29E-10 | -0.010 | 0.030 | 7.90E-01 |
| SBP              | rs2613765   | A | 0.47 | -0.020 | 0.004 | 1.03E-21 | -0.012 | 0.008 | 1.40E-01 |
| SBP              | rs3810299   | T | 0.87 | 0.015  | 0.003 | 3.46E-08 | -0.019 | 0.012 | 1.10E-01 |
| SBP              | rs7256564   | A | 0.31 | -0.028 | 0.004 | 4.88E-09 | 0.010  | 0.008 | 2.00E-01 |
| SBP              | rs73046792  | A | 0.15 | -0.022 | 0.003 | 3.99E-15 | -0.002 | 0.010 | 8.70E-01 |
| SBP              | rs1764975   | T | 0.18 | -0.016 | 0.003 | 1.64E-11 | 0.015  | 0.010 | 9.80E-02 |
| SBP              | rs2801008   | T | 0.68 | 0.020  | 0.002 | 7.70E-10 | -0.019 | 0.008 | 3.10E-02 |
| SBP              | rs6021247   | A | 0.53 | 0.023  | 0.003 | 4.50E-17 | 0.013  | 0.008 | 1.10E-01 |
| SBP              | rs1882961   | T | 0.31 | 0.020  | 0.003 | 1.54E-18 | 0.000  | 0.008 | 9.50E-01 |
| SBP              | rs28578714  | T | 0.61 | -0.030 | 0.005 | 3.97E-14 | 0.003  | 0.008 | 6.50E-01 |
| SBP              | rs9608690   | A | 0.07 | 0.029  | 0.002 | 2.81E-09 | -0.017 | 0.016 | 2.40E-01 |
| Strenuous sports | rs10946808  | G | 0.70 | 0.030  | 0.008 | 9.90E-10 | -0.019 | 0.016 | 8.73E-03 |
| Strenuous sports | rs111901094 | G | 0.89 | 0.039  | 0.010 | 3.00E-09 | -0.106 | 0.000 | 1.02E-02 |
| Strenuous sports | rs159544    | G | 0.61 | 0.030  | 0.008 | 1.30E-09 | -0.009 | 0.220 | 7.91E-03 |
| Strenuous sports | rs166840    | G | 0.41 | 0.030  | 0.007 | 3.10E-11 | -0.013 | 0.110 | 7.94E-03 |
| Strenuous sports | rs62253088  | T | 0.64 | 0.049  | 0.008 | 1.00E-19 | -0.009 | 0.250 | 8.28E-03 |
| Strenuous sports | rs75930676  | C | 0.03 | 0.073  | 0.019 | 2.00E-09 | -0.018 | 0.310 | 1.82E-02 |
| SmoIndex         | rs10918701  | G | 0.37 | 0.012  | 0.002 | 1.97E-09 | 0.009  | 0.008 | 3.10E-01 |
| SmoIndex         | rs10922907  | A | 0.45 | 0.015  | 0.002 | 6.38E-14 | 0.012  | 0.008 | 1.40E-01 |
| SmoIndex         | rs11210229  | A | 0.38 | 0.017  | 0.002 | 1.90E-17 | -0.007 | 0.008 | 4.40E-01 |
| SmoIndex         | rs1193237   | G | 0.44 | -0.011 | 0.002 | 3.80E-08 | -0.005 | 0.008 | 5.50E-01 |
| SmoIndex         | rs1931263   | G | 0.51 | -0.011 | 0.002 | 3.80E-08 | -0.012 | 0.008 | 9.70E-02 |
| SmoIndex         | rs1933270   | T | 0.36 | 0.013  | 0.002 | 8.03E-11 | 0.016  | 0.008 | 4.40E-02 |
| SmoIndex         | rs4949465   | T | 0.87 | -0.017 | 0.003 | 1.46E-08 | 0.003  | 0.012 | 8.90E-01 |
| SmoIndex         | rs549845    | G | 0.30 | 0.016  | 0.002 | 1.24E-15 | -0.012 | 0.008 | 1.60E-01 |
| SmoIndex         | rs7519626   | C | 0.32 | 0.012  | 0.002 | 1.97E-09 | 0.013  | 0.008 | 1.80E-01 |
| SmoIndex         | rs7528604   | G | 0.57 | 0.014  | 0.002 | 2.56E-12 | 0.011  | 0.008 | 2.20E-01 |
| SmoIndex         | rs7553348   | G | 0.44 | 0.014  | 0.002 | 2.56E-12 | -0.015 | 0.008 | 3.50E-02 |
| SmoIndex         | rs9435340   | T | 0.34 | 0.012  | 0.002 | 1.97E-09 | 0.011  | 0.008 | 2.20E-01 |
| SmoIndex         | rs12623702  | A | 0.61 | -0.014 | 0.002 | 2.56E-12 | -0.008 | 0.008 | 2.80E-01 |
| SmoIndex         | rs13009008  | A | 0.33 | 0.012  | 0.002 | 1.97E-09 | -0.007 | 0.008 | 3.70E-01 |
| SmoIndex         | rs13016665  | C | 0.58 | -0.012 | 0.002 | 1.97E-09 | -0.014 | 0.008 | 6.70E-02 |
| SmoIndex         | rs2678670   | A | 0.49 | 0.013  | 0.002 | 8.03E-11 | 0.010  | 0.008 | 2.20E-01 |
| SmoIndex         | rs2867112   | T | 0.84 | 0.021  | 0.003 | 2.56E-12 | -0.006 | 0.011 | 6.10E-01 |
| SmoIndex         | rs2890772   | G | 0.41 | -0.020 | 0.002 | 1.52E-23 | -0.003 | 0.008 | 7.20E-01 |
| SmoIndex         | rs359243    | T | 0.39 | -0.013 | 0.002 | 8.03E-11 | -0.024 | 0.008 | 3.50E-03 |
| SmoIndex         | rs3769949   | T | 0.53 | -0.012 | 0.002 | 1.97E-09 | -0.010 | 0.008 | 2.00E-01 |
| SmoIndex         | rs3811038   | T | 0.72 | -0.014 | 0.002 | 2.56E-12 | -0.019 | 0.009 | 3.90E-02 |
| SmoIndex         | rs4473348   | A | 0.25 | -0.015 | 0.002 | 6.38E-14 | 0.010  | 0.009 | 2.10E-01 |
| SmoIndex         | rs4671357   | T | 0.52 | -0.014 | 0.002 | 2.56E-12 | -0.008 | 0.008 | 2.80E-01 |
| SmoIndex         | rs62135536  | C | 0.97 | 0.035  | 0.006 | 5.43E-09 | 0.029  | 0.022 | 1.10E-01 |
| SmoIndex         | rs62155874  | A | 0.87 | -0.024 | 0.003 | 1.24E-15 | -0.025 | 0.012 | 2.70E-02 |
| SmoIndex         | rs62175972  | T | 0.97 | 0.031  | 0.006 | 2.38E-07 | -0.019 | 0.022 | 4.10E-01 |
| SmoIndex         | rs6741228   | T | 0.43 | 0.011  | 0.002 | 3.80E-08 | -0.008 | 0.008 | 3.10E-01 |
| SmoIndex         | rs7569203   | A | 0.69 | -0.016 | 0.002 | 1.24E-15 | -0.015 | 0.008 | 3.70E-02 |
| SmoIndex         | rs326341    | G | 0.53 | 0.014  | 0.002 | 2.56E-12 | -0.018 | 0.008 | 3.60E-02 |
| SmoIndex         | rs421983    | T | 0.52 | 0.013  | 0.002 | 8.03E-11 | -0.009 | 0.008 | 2.30E-01 |
| SmoIndex         | rs6778080   | T | 0.27 | 0.016  | 0.002 | 1.24E-15 | -0.008 | 0.009 | 3.30E-01 |
| SmoIndex         | rs6779302   | G | 0.63 | -0.013 | 0.002 | 8.03E-11 | 0.009  | 0.008 | 1.80E-01 |
| SmoIndex         | rs73220544  | A | 0.84 | -0.016 | 0.003 | 9.64E-08 | -0.005 | 0.011 | 6.20E-01 |
| SmoIndex         | rs775758    | A | 0.43 | 0.012  | 0.002 | 1.97E-09 | 0.013  | 0.008 | 1.30E-01 |
| SmoIndex         | rs9842947   | C | 0.33 | -0.013 | 0.002 | 8.03E-11 | 0.003  | 0.008 | 7.50E-01 |
| SmoIndex         | rs17576594  | G | 0.72 | 0.016  | 0.002 | 1.24E-15 | -0.008 | 0.009 | 4.80E-01 |
| SmoIndex         | rs317021    | T | 0.81 | -0.017 | 0.003 | 1.46E-08 | -0.013 | 0.010 | 2.80E-01 |
| SmoIndex         | rs61796681  | A | 0.91 | -0.019 | 0.004 | 2.03E-06 | 0.011  | 0.014 | 4.60E-01 |



|           |             |   |      |        |       |          |        |       |          |
|-----------|-------------|---|------|--------|-------|----------|--------|-------|----------|
| SmolIndex | rs624833    | T | 0.70 | 0.013  | 0.002 | 8.03E-11 | 0.004  | 0.008 | 5.50E-01 |
| SmolIndex | rs72678864  | G | 0.83 | 0.018  | 0.003 | 1.97E-09 | 0.016  | 0.010 | 1.10E-01 |
| SmolIndex | rs10052591  | T | 0.57 | 0.012  | 0.002 | 1.97E-09 | 0.003  | 0.008 | 9.40E-01 |
| SmolIndex | rs11948770  | T | 0.77 | -0.015 | 0.002 | 6.38E-14 | 0.003  | 0.009 | 7.10E-01 |
| SmolIndex | rs13153393  | A | 0.88 | -0.020 | 0.003 | 2.62E-11 | -0.018 | 0.012 | 1.40E-01 |
| SmolIndex | rs2080870   | A | 0.26 | 0.012  | 0.002 | 1.97E-09 | -0.001 | 0.009 | 7.60E-01 |
| SmolIndex | rs245774    | A | 0.27 | -0.013 | 0.002 | 8.03E-11 | -0.016 | 0.009 | 8.00E-02 |
| SmolIndex | rs329120    | C | 0.58 | 0.014  | 0.002 | 2.56E-12 | 0.017  | 0.008 | 3.20E-02 |
| SmolIndex | rs4571506   | C | 0.54 | 0.011  | 0.002 | 3.80E-08 | 0.010  | 0.008 | 1.90E-01 |
| SmolIndex | rs4957528   | A | 0.21 | -0.015 | 0.002 | 6.38E-14 | 0.016  | 0.010 | 1.30E-01 |
| SmolIndex | rs71627581  | G | 0.89 | 0.019  | 0.003 | 2.40E-10 | 0.006  | 0.012 | 6.20E-01 |
| SmolIndex | rs986391    | G | 0.37 | 0.016  | 0.002 | 1.24E-15 | 0.012  | 0.008 | 2.30E-01 |
| SmolIndex | rs12202536  | A | 0.51 | -0.012 | 0.002 | 1.97E-09 | -0.010 | 0.008 | 3.60E-01 |
| SmolIndex | rs2254710   | C | 0.24 | 0.013  | 0.002 | 8.03E-11 | -0.016 | 0.009 | 1.00E-01 |
| SmolIndex | rs2894808   | T | 0.92 | -0.022 | 0.004 | 3.80E-08 | -0.018 | 0.015 | 2.10E-01 |
| SmolIndex | rs6935954   | A | 0.42 | 0.014  | 0.002 | 2.56E-12 | 0.014  | 0.008 | 6.70E-02 |
| SmolIndex | rs7766610   | C | 0.18 | 0.018  | 0.003 | 1.97E-09 | -0.003 | 0.010 | 9.40E-01 |
| SmolIndex | rs10226228  | A | 0.63 | -0.016 | 0.002 | 1.24E-15 | -0.020 | 0.008 | 3.00E-02 |
| SmolIndex | rs10282292  | C | 0.36 | 0.013  | 0.002 | 8.03E-11 | 0.001  | 0.008 | 9.90E-01 |
| SmolIndex | rs11768481  | C | 0.67 | 0.013  | 0.002 | 8.03E-11 | 0.006  | 0.008 | 5.70E-01 |
| SmolIndex | rs1922018   | C | 0.36 | 0.014  | 0.002 | 2.56E-12 | 0.016  | 0.008 | 2.80E-02 |
| SmolIndex | rs2401924   | G | 0.50 | 0.015  | 0.002 | 6.38E-14 | -0.008 | 0.008 | 3.60E-01 |
| SmolIndex | rs4731925   | C | 0.32 | -0.012 | 0.002 | 1.97E-09 | -0.001 | 0.008 | 8.50E-01 |
| SmolIndex | rs6957896   | C | 0.50 | -0.011 | 0.002 | 3.80E-08 | -0.005 | 0.008 | 6.10E-01 |
| SmolIndex | rs6962772   | A | 0.85 | 0.016  | 0.003 | 9.64E-08 | 0.043  | 0.011 | 8.40E-05 |
| SmolIndex | rs7807019   | A | 0.54 | -0.015 | 0.002 | 6.38E-14 | 0.000  | 0.008 | 9.50E-01 |
| SmolIndex | rs11783093  | C | 0.84 | 0.023  | 0.003 | 1.77E-14 | 0.012  | 0.011 | 1.50E-01 |
| SmolIndex | rs2062882   | G | 0.59 | -0.012 | 0.002 | 1.97E-09 | 0.008  | 0.008 | 3.20E-01 |
| SmolIndex | rs35169606  | T | 0.61 | 0.013  | 0.002 | 8.03E-11 | -0.002 | 0.008 | 7.50E-01 |
| SmolIndex | rs72674867  | A | 0.77 | 0.013  | 0.002 | 8.03E-11 | 0.014  | 0.009 | 1.30E-01 |
| SmolIndex | rs113382419 | C | 0.89 | -0.041 | 0.003 | 1.61E-42 | -0.002 | 0.012 | 8.70E-01 |
| SmolIndex | rs1221148   | C | 0.59 | 0.013  | 0.002 | 8.03E-11 | 0.009  | 0.008 | 2.10E-01 |
| SmolIndex | rs1246265   | T | 0.31 | -0.013 | 0.002 | 8.03E-11 | 0.005  | 0.008 | 4.80E-01 |
| SmolIndex | rs13296519  | G | 0.61 | -0.014 | 0.002 | 2.56E-12 | 0.000  | 0.008 | 7.50E-01 |
| SmolIndex | rs4543592   | T | 0.52 | -0.012 | 0.002 | 1.97E-09 | 0.001  | 0.008 | 8.30E-01 |
| SmolIndex | rs7039819   | G | 0.43 | 0.013  | 0.002 | 8.03E-11 | -0.004 | 0.008 | 7.70E-01 |
| SmolIndex | rs10823968  | A | 0.63 | 0.012  | 0.002 | 1.97E-09 | -0.006 | 0.008 | 4.40E-01 |
| SmolIndex | rs11255908  | T | 0.74 | -0.015 | 0.002 | 6.38E-14 | -0.009 | 0.009 | 3.60E-01 |
| SmolIndex | rs12244388  | G | 0.66 | -0.019 | 0.002 | 2.10E-21 | 0.006  | 0.008 | 5.50E-01 |
| SmolIndex | rs17553262  | A | 0.89 | -0.018 | 0.003 | 1.97E-09 | 0.002  | 0.012 | 8.40E-01 |
| SmolIndex | rs2675638   | G | 0.58 | 0.012  | 0.002 | 1.97E-09 | 0.022  | 0.008 | 5.50E-03 |
| SmolIndex | rs3896224   | A | 0.59 | 0.014  | 0.002 | 2.56E-12 | -0.001 | 0.008 | 9.30E-01 |
| SmolIndex | rs7077678   | C | 0.62 | 0.012  | 0.002 | 1.97E-09 | -0.003 | 0.008 | 7.60E-01 |
| SmolIndex | rs112282219 | G | 0.96 | -0.033 | 0.005 | 4.11E-11 | 0.026  | 0.020 | 2.20E-01 |
| SmolIndex | rs17309874  | G | 0.74 | -0.016 | 0.002 | 1.24E-15 | -0.017 | 0.009 | 8.60E-02 |
| SmolIndex | rs34866095  | A | 0.69 | -0.012 | 0.002 | 1.97E-09 | -0.002 | 0.008 | 6.40E-01 |
| SmolIndex | rs4391802   | A | 0.71 | 0.015  | 0.002 | 6.38E-14 | 0.002  | 0.008 | 9.10E-01 |
| SmolIndex | rs75742406  | G | 0.74 | 0.014  | 0.002 | 2.56E-12 | -0.015 | 0.009 | 1.00E-01 |
| SmolIndex | rs9919670   | G | 0.61 | -0.022 | 0.002 | 3.82E-28 | -0.002 | 0.008 | 9.60E-01 |
| SmolIndex | rs10879871  | T | 0.34 | -0.014 | 0.002 | 2.56E-12 | -0.002 | 0.008 | 8.10E-01 |
| SmolIndex | rs12831617  | C | 0.76 | -0.013 | 0.002 | 8.03E-11 | -0.014 | 0.009 | 1.60E-01 |
| SmolIndex | rs7297175   | T | 0.43 | -0.012 | 0.002 | 1.97E-09 | -0.012 | 0.008 | 1.80E-01 |
| SmolIndex | rs74086911  | G | 0.93 | 0.021  | 0.004 | 1.52E-07 | 0.005  | 0.015 | 6.30E-01 |
| SmolIndex | rs6562474   | C | 0.65 | 0.012  | 0.002 | 1.97E-09 | -0.014 | 0.008 | 7.60E-02 |
| SmolIndex | rs7333559   | G | 0.21 | 0.015  | 0.002 | 6.38E-14 | 0.006  | 0.010 | 3.70E-01 |
| SmolIndex | rs3742365   | T | 0.60 | -0.016 | 0.002 | 1.24E-15 | -0.013 | 0.008 | 8.30E-02 |

|           |             |   |      |        |       |          |        |       |          |
|-----------|-------------|---|------|--------|-------|----------|--------|-------|----------|
| SmolIndex | rs7155595   | A | 0.67 | -0.013 | 0.002 | 8.03E-11 | 0.001  | 0.008 | 9.80E-01 |
| SmolIndex | rs860326    | C | 0.43 | 0.012  | 0.002 | 1.97E-09 | 0.019  | 0.008 | 2.10E-02 |
| SmolIndex | rs28485305  | C | 0.63 | 0.012  | 0.002 | 1.97E-09 | 0.008  | 0.008 | 5.00E-01 |
| SmolIndex | rs35175834  | G | 0.79 | -0.024 | 0.002 | 3.55E-33 | 0.003  | 0.009 | 9.40E-01 |
| SmolIndex | rs6598539   | T | 0.49 | -0.012 | 0.002 | 1.97E-09 | -0.002 | 0.008 | 9.90E-01 |
| SmolIndex | rs8042134   | T | 0.54 | -0.014 | 0.002 | 2.56E-12 | 0.005  | 0.008 | 6.30E-01 |
| SmolIndex | rs8042849   | T | 0.34 | 0.028  | 0.002 | 1.56E-44 | 0.009  | 0.008 | 1.70E-01 |
| SmolIndex | rs1050847   | C | 0.43 | 0.011  | 0.002 | 3.80E-08 | -0.009 | 0.008 | 3.00E-01 |
| SmolIndex | rs11861214  | G | 0.78 | 0.014  | 0.002 | 2.56E-12 | 0.018  | 0.009 | 2.80E-02 |
| SmolIndex | rs12708665  | A | 0.29 | -0.013 | 0.002 | 8.03E-11 | -0.023 | 0.009 | 1.00E-02 |
| SmolIndex | rs369230    | G | 0.31 | -0.013 | 0.002 | 8.03E-11 | -0.020 | 0.008 | 1.80E-02 |
| SmolIndex | rs57611503  | G | 0.49 | 0.011  | 0.002 | 3.80E-08 | 0.010  | 0.008 | 1.80E-01 |
| SmolIndex | rs60952428  | T | 0.91 | 0.019  | 0.003 | 2.40E-10 | 0.004  | 0.014 | 7.70E-01 |
| SmolIndex | rs889398    | C | 0.59 | 0.013  | 0.002 | 8.03E-11 | 0.016  | 0.008 | 4.90E-02 |
| SmolIndex | rs67596067  | G | 0.65 | -0.013 | 0.002 | 8.03E-11 | 0.001  | 0.008 | 8.80E-01 |
| SmolIndex | rs732083    | G | 0.33 | 0.012  | 0.002 | 1.97E-09 | 0.017  | 0.008 | 5.60E-02 |
| SmolIndex | rs8614      | C | 0.82 | -0.017 | 0.003 | 1.46E-08 | -0.011 | 0.010 | 3.50E-01 |
| SmolIndex | rs9904288   | T | 0.71 | 0.012  | 0.002 | 1.97E-09 | 0.004  | 0.008 | 6.20E-01 |
| SmolIndex | rs12967855  | A | 0.33 | 0.012  | 0.002 | 1.97E-09 | -0.003 | 0.008 | 7.60E-01 |
| SmolIndex | rs62098013  | G | 0.64 | -0.012 | 0.002 | 1.97E-09 | 0.005  | 0.008 | 5.80E-01 |
| SmolIndex | rs71367545  | G | 0.79 | -0.015 | 0.002 | 6.38E-14 | 0.010  | 0.010 | 3.90E-01 |
| SmolIndex | rs35343344  | C | 0.73 | 0.013  | 0.002 | 8.03E-11 | -0.008 | 0.009 | 3.70E-01 |
| SmolIndex | rs76608582  | C | 0.95 | 0.031  | 0.005 | 5.65E-10 | 0.039  | 0.019 | 6.20E-02 |
| SmolIndex | rs12481282  | G | 0.72 | -0.013 | 0.002 | 8.03E-11 | -0.002 | 0.009 | 8.90E-01 |
| SmolIndex | rs348809    | A | 0.35 | -0.012 | 0.002 | 1.97E-09 | 0.001  | 0.008 | 8.30E-01 |
| SmolIndex | rs4814873   | C | 0.77 | 0.014  | 0.002 | 2.56E-12 | 0.001  | 0.009 | 9.60E-01 |
| SmolIndex | rs6011779   | C | 0.19 | 0.028  | 0.003 | 1.03E-20 | 0.007  | 0.010 | 5.00E-01 |
| SmolIndex | rs6119897   | G | 0.76 | -0.018 | 0.002 | 2.26E-19 | 0.010  | 0.009 | 2.30E-01 |
| SmolIndex | rs147412694 | G | 0.85 | -0.017 | 0.003 | 1.46E-08 | 0.002  | 0.011 | 9.10E-01 |
| SmolIndex | rs2838834   | C | 0.70 | -0.013 | 0.002 | 8.03E-11 | -0.006 | 0.008 | 4.10E-01 |
| SmolIndex | rs136233    | A | 0.81 | -0.014 | 0.003 | 3.06E-06 | -0.008 | 0.010 | 3.40E-01 |
| SmolIndex | rs202645    | A | 0.20 | -0.015 | 0.002 | 6.38E-14 | -0.006 | 0.010 | 4.40E-01 |
| Smolnit   | rs1008078   | T | 0.40 | 0.023  | 0.003 | 1.63E-18 | 0.009  | 0.008 | 2.90E-01 |
| Smolnit   | rs10789369  | G | 0.62 | -0.023 | 0.003 | 3.38E-19 | 0.006  | 0.008 | 4.90E-01 |
| Smolnit   | rs10873871  | G | 0.21 | 0.017  | 0.003 | 2.86E-08 | -0.012 | 0.009 | 2.60E-01 |
| Smolnit   | rs10914684  | A | 0.32 | -0.016 | 0.003 | 6.43E-09 | 0.002  | 0.008 | 8.40E-01 |
| Smolnit   | rs11162019  | T | 0.36 | -0.015 | 0.003 | 4.97E-09 | 0.001  | 0.008 | 9.70E-01 |
| Smolnit   | rs12022778  | C | 0.20 | 0.027  | 0.003 | 3.23E-17 | 0.028  | 0.009 | 2.50E-03 |
| Smolnit   | rs12027999  | C | 0.12 | -0.024 | 0.004 | 5.20E-10 | 0.005  | 0.012 | 8.00E-01 |
| Smolnit   | rs12130857  | A | 0.32 | -0.018 | 0.003 | 3.64E-11 | -0.019 | 0.008 | 1.30E-02 |
| Smolnit   | rs12563365  | A | 0.56 | 0.017  | 0.003 | 1.06E-10 | 0.014  | 0.008 | 8.70E-02 |
| Smolnit   | rs12739243  | C | 0.22 | -0.021 | 0.003 | 4.49E-12 | -0.002 | 0.009 | 7.60E-01 |
| Smolnit   | rs12740789  | A | 0.18 | -0.028 | 0.003 | 1.17E-17 | -0.003 | 0.010 | 8.50E-01 |
| Smolnit   | rs12755632  | G | 0.32 | -0.015 | 0.003 | 1.89E-08 | -0.010 | 0.008 | 2.10E-01 |
| Smolnit   | rs147052174 | T | 0.02 | 0.062  | 0.010 | 2.29E-10 | 0.023  | 0.029 | 5.00E-01 |
| Smolnit   | rs1514176   | A | 0.58 | -0.019 | 0.003 | 7.63E-14 | 0.014  | 0.008 | 6.70E-02 |
| Smolnit   | rs1889571   | G | 0.13 | 0.022  | 0.004 | 4.26E-09 | -0.004 | 0.012 | 8.40E-01 |
| Smolnit   | rs1937443   | G | 0.56 | 0.020  | 0.003 | 1.78E-15 | 0.008  | 0.008 | 4.10E-01 |
| Smolnit   | rs2637869   | A | 0.30 | 0.018  | 0.003 | 6.38E-11 | 0.004  | 0.009 | 8.20E-01 |
| Smolnit   | rs2901785   | A | 0.45 | -0.017 | 0.003 | 1.45E-11 | 0.004  | 0.008 | 6.50E-01 |
| Smolnit   | rs301807    | G | 0.57 | 0.018  | 0.003 | 2.56E-12 | 0.005  | 0.008 | 4.80E-01 |
| Smolnit   | rs35656245  | A | 0.28 | 0.016  | 0.003 | 2.21E-08 | -0.025 | 0.009 | 2.20E-03 |
| Smolnit   | rs3820277   | T | 0.53 | -0.019 | 0.003 | 1.55E-13 | 0.002  | 0.008 | 8.30E-01 |
| Smolnit   | rs45444697  | G | 0.21 | 0.020  | 0.003 | 2.67E-10 | 0.012  | 0.009 | 1.80E-01 |
| Smolnit   | rs4912332   | T | 0.49 | 0.014  | 0.003 | 3.01E-08 | 0.006  | 0.008 | 2.60E-01 |
| Smolnit   | rs876793    | C | 0.35 | -0.018 | 0.003 | 5.76E-11 | 0.006  | 0.008 | 4.50E-01 |

|         |             |   |      |        |       |          |        |       |          |
|---------|-------------|---|------|--------|-------|----------|--------|-------|----------|
| Smolnit | rs925524    | G | 0.71 | 0.016  | 0.003 | 3.01E-08 | 0.009  | 0.008 | 2.80E-01 |
| Smolnit | rs951740    | A | 0.63 | 0.030  | 0.003 | 3.07E-29 | 0.005  | 0.008 | 5.00E-01 |
| Smolnit | rs1004787   | A | 0.55 | 0.028  | 0.003 | 1.39E-28 | 0.017  | 0.008 | 1.30E-02 |
| Smolnit | rs1022376   | C | 0.52 | -0.015 | 0.003 | 1.62E-08 | -0.010 | 0.008 | 2.20E-01 |
| Smolnit | rs10490159  | T | 0.39 | 0.017  | 0.003 | 3.83E-11 | -0.007 | 0.008 | 3.70E-01 |
| Smolnit | rs114976176 | C | 0.35 | -0.016 | 0.003 | 6.11E-09 | -0.012 | 0.008 | 2.00E-01 |
| Smolnit | rs11692435  | A | 0.08 | 0.025  | 0.005 | 4.55E-08 | 0.015  | 0.015 | 3.60E-01 |
| Smolnit | rs12474587  | T | 0.43 | 0.024  | 0.003 | 4.83E-21 | 0.007  | 0.008 | 4.70E-01 |
| Smolnit | rs12714017  | C | 0.51 | 0.015  | 0.003 | 3.65E-09 | 0.003  | 0.008 | 6.30E-01 |
| Smolnit | rs13007361  | A | 0.21 | 0.018  | 0.003 | 2.33E-08 | 0.013  | 0.010 | 2.10E-01 |
| Smolnit | rs13392222  | C | 0.14 | -0.023 | 0.004 | 1.97E-10 | 0.008  | 0.011 | 4.80E-01 |
| Smolnit | rs1445649   | C | 0.54 | 0.021  | 0.003 | 8.29E-16 | -0.012 | 0.008 | 9.40E-02 |
| Smolnit | rs1518393   | C | 0.62 | 0.017  | 0.003 | 1.31E-10 | 0.015  | 0.008 | 8.00E-02 |
| Smolnit | rs16826827  | C | 0.12 | -0.022 | 0.004 | 9.22E-09 | 0.003  | 0.012 | 8.00E-01 |
| Smolnit | rs17229285  | T | 0.51 | -0.015 | 0.003 | 1.24E-09 | 0.013  | 0.008 | 1.40E-01 |
| Smolnit | rs17616642  | G | 0.25 | -0.017 | 0.003 | 2.10E-08 | 0.011  | 0.009 | 2.40E-01 |
| Smolnit | rs1863161   | A | 0.56 | 0.015  | 0.003 | 2.30E-09 | 0.011  | 0.008 | 1.40E-01 |
| Smolnit | rs1901477   | G | 0.51 | 0.030  | 0.003 | 2.00E-31 | -0.001 | 0.008 | 9.20E-01 |
| Smolnit | rs2539706   | A | 0.53 | 0.016  | 0.003 | 1.97E-10 | 0.003  | 0.008 | 5.10E-01 |
| Smolnit | rs2710634   | C | 0.52 | -0.018 | 0.003 | 3.30E-12 | -0.002 | 0.008 | 7.40E-01 |
| Smolnit | rs3115418   | C | 0.45 | -0.014 | 0.003 | 2.72E-08 | -0.009 | 0.008 | 2.20E-01 |
| Smolnit | rs34399632  | G | 0.23 | 0.019  | 0.003 | 1.45E-10 | -0.018 | 0.009 | 3.60E-02 |
| Smolnit | rs357304    | C | 0.73 | 0.017  | 0.003 | 5.51E-09 | 0.001  | 0.009 | 8.50E-01 |
| Smolnit | rs359247    | T | 0.64 | 0.022  | 0.003 | 9.85E-17 | 0.029  | 0.008 | 4.60E-04 |
| Smolnit | rs3811038   | C | 0.28 | 0.019  | 0.003 | 1.61E-11 | 0.019  | 0.009 | 3.90E-02 |
| Smolnit | rs4674916   | A | 0.33 | -0.018 | 0.003 | 3.12E-11 | -0.003 | 0.008 | 7.90E-01 |
| Smolnit | rs4674993   | G | 0.20 | -0.024 | 0.003 | 4.82E-14 | -0.007 | 0.010 | 4.80E-01 |
| Smolnit | rs56208390  | G | 0.12 | 0.022  | 0.004 | 2.72E-08 | -0.008 | 0.012 | 6.40E-01 |
| Smolnit | rs61533748  | C | 0.38 | 0.017  | 0.003 | 2.82E-11 | -0.003 | 0.008 | 7.00E-01 |
| Smolnit | rs62106258  | C | 0.05 | -0.045 | 0.006 | 3.38E-14 | -0.043 | 0.018 | 2.00E-02 |
| Smolnit | rs62137126  | G | 0.12 | -0.024 | 0.004 | 1.31E-09 | -0.017 | 0.012 | 1.40E-01 |
| Smolnit | rs62180324  | A | 0.21 | -0.020 | 0.003 | 3.83E-10 | 0.016  | 0.009 | 1.10E-01 |
| Smolnit | rs62193862  | A | 0.10 | 0.024  | 0.004 | 1.99E-08 | -0.003 | 0.013 | 8.60E-01 |
| Smolnit | rs6731872   | G | 0.83 | 0.032  | 0.003 | 5.35E-21 | -0.005 | 0.010 | 6.50E-01 |
| Smolnit | rs6750107   | A | 0.39 | 0.015  | 0.003 | 2.58E-08 | 0.006  | 0.008 | 4.90E-01 |
| Smolnit | rs6750529   | T | 0.74 | 0.020  | 0.003 | 9.16E-12 | -0.010 | 0.009 | 2.00E-01 |
| Smolnit | rs6756212   | T | 0.54 | -0.034 | 0.003 | 3.62E-40 | -0.002 | 0.008 | 7.00E-01 |
| Smolnit | rs72790288  | A | 0.03 | -0.046 | 0.008 | 3.30E-09 | -0.009 | 0.023 | 7.60E-01 |
| Smolnit | rs7598402   | G | 0.49 | -0.015 | 0.003 | 7.50E-09 | -0.010 | 0.008 | 2.50E-01 |
| Smolnit | rs7600835   | A | 0.34 | -0.015 | 0.003 | 1.80E-08 | -0.011 | 0.008 | 2.20E-01 |
| Smolnit | rs10446419  | G | 0.21 | -0.020 | 0.003 | 4.94E-10 | -0.006 | 0.010 | 3.80E-01 |
| Smolnit | rs10935779  | T | 0.42 | -0.014 | 0.003 | 3.01E-08 | -0.006 | 0.008 | 4.10E-01 |
| Smolnit | rs11128203  | A | 0.53 | 0.020  | 0.003 | 1.31E-15 | 0.017  | 0.008 | 2.30E-02 |
| Smolnit | rs11713899  | C | 0.17 | 0.019  | 0.003 | 3.17E-08 | -0.003 | 0.010 | 8.20E-01 |
| Smolnit | rs1187820   | T | 0.44 | -0.014 | 0.003 | 2.72E-08 | -0.005 | 0.008 | 5.50E-01 |
| Smolnit | rs12633090  | C | 0.18 | -0.023 | 0.003 | 3.14E-12 | 0.001  | 0.010 | 7.20E-01 |
| Smolnit | rs13066050  | T | 0.21 | 0.019  | 0.003 | 1.97E-09 | 0.019  | 0.010 | 7.30E-02 |
| Smolnit | rs1449012   | T | 0.46 | -0.015 | 0.003 | 1.78E-09 | -0.012 | 0.008 | 2.10E-01 |
| Smolnit | rs1549979   | T | 0.62 | -0.025 | 0.003 | 8.87E-21 | -0.001 | 0.008 | 1.00E+00 |
| Smolnit | rs16828799  | T | 0.16 | 0.020  | 0.004 | 1.80E-08 | -0.017 | 0.011 | 1.30E-01 |
| Smolnit | rs1714521   | C | 0.41 | -0.016 | 0.003 | 3.12E-10 | -0.004 | 0.008 | 6.60E-01 |
| Smolnit | rs221988    | C | 0.38 | -0.015 | 0.003 | 1.39E-08 | 0.006  | 0.008 | 4.70E-01 |
| Smolnit | rs2276825   | C | 0.25 | 0.019  | 0.003 | 1.87E-10 | 0.002  | 0.009 | 6.20E-01 |
| Smolnit | rs2279829   | T | 0.22 | -0.017 | 0.003 | 1.99E-08 | -0.008 | 0.009 | 3.20E-01 |
| Smolnit | rs2306866   | T | 0.61 | -0.017 | 0.003 | 1.87E-10 | -0.001 | 0.008 | 7.70E-01 |
| Smolnit | rs2319545   | A | 0.15 | 0.023  | 0.004 | 8.24E-11 | 0.010  | 0.011 | 5.30E-01 |

|         |             |   |      |        |       |          |        |       |          |
|---------|-------------|---|------|--------|-------|----------|--------|-------|----------|
| Smolnit | rs2526390   | T | 0.33 | 0.020  | 0.003 | 3.56E-14 | 0.001  | 0.008 | 8.00E-01 |
| Smolnit | rs2734390   | G | 0.37 | 0.015  | 0.003 | 2.10E-08 | -0.001 | 0.008 | 6.30E-01 |
| Smolnit | rs3172494   | T | 0.12 | -0.029 | 0.004 | 3.34E-13 | 0.001  | 0.013 | 9.90E-01 |
| Smolnit | rs4543050   | T | 0.82 | 0.022  | 0.003 | 1.45E-11 | 0.010  | 0.010 | 4.20E-01 |
| Smolnit | rs62246017  | A | 0.32 | -0.016 | 0.003 | 2.98E-09 | -0.009 | 0.008 | 2.70E-01 |
| Smolnit | rs6437769   | T | 0.58 | 0.014  | 0.003 | 3.70E-08 | 0.003  | 0.008 | 6.40E-01 |
| Smolnit | rs6438436   | T | 0.82 | 0.025  | 0.003 | 5.34E-14 | 0.003  | 0.010 | 9.30E-01 |
| Smolnit | rs6782116   | T | 0.42 | -0.015 | 0.003 | 1.46E-08 | -0.003 | 0.008 | 8.30E-01 |
| Smolnit | rs73831818  | G | 0.06 | 0.032  | 0.005 | 5.51E-09 | 0.024  | 0.016 | 1.60E-01 |
| Smolnit | rs748832    | G | 0.37 | 0.017  | 0.003 | 6.72E-11 | -0.006 | 0.008 | 3.20E-01 |
| Smolnit | rs7631379   | C | 0.21 | 0.021  | 0.003 | 4.03E-11 | -0.001 | 0.010 | 9.60E-01 |
| Smolnit | rs7640107   | T | 0.43 | -0.014 | 0.003 | 3.52E-08 | -0.020 | 0.008 | 7.50E-03 |
| Smolnit | rs9288999   | A | 0.74 | 0.017  | 0.003 | 1.53E-09 | -0.006 | 0.009 | 4.60E-01 |
| Smolnit | rs9826984   | A | 0.54 | -0.014 | 0.003 | 3.90E-08 | -0.006 | 0.008 | 3.80E-01 |
| Smolnit | rs9841807   | T | 0.27 | 0.016  | 0.003 | 1.32E-08 | -0.005 | 0.009 | 5.80E-01 |
| Smolnit | rs9850597   | A | 0.82 | -0.019 | 0.003 | 1.62E-08 | -0.007 | 0.010 | 4.60E-01 |
| Smolnit | rs1116690   | G | 0.74 | 0.016  | 0.003 | 2.21E-08 | -0.008 | 0.009 | 2.50E-01 |
| Smolnit | rs112725451 | T | 0.17 | 0.026  | 0.003 | 1.66E-14 | -0.010 | 0.010 | 5.80E-01 |
| Smolnit | rs1160685   | G | 0.45 | 0.015  | 0.003 | 2.30E-09 | -0.013 | 0.008 | 1.00E-01 |
| Smolnit | rs13109980  | A | 0.33 | -0.022 | 0.003 | 3.33E-16 | -0.016 | 0.008 | 4.70E-02 |
| Smolnit | rs13110073  | C | 0.40 | -0.025 | 0.003 | 3.23E-21 | 0.001  | 0.008 | 9.50E-01 |
| Smolnit | rs1435479   | T | 0.29 | 0.016  | 0.003 | 5.80E-09 | 0.004  | 0.008 | 6.40E-01 |
| Smolnit | rs3934797   | A | 0.18 | -0.021 | 0.003 | 1.12E-10 | -0.012 | 0.010 | 1.80E-01 |
| Smolnit | rs4140932   | A | 0.43 | -0.014 | 0.003 | 4.79E-08 | -0.015 | 0.008 | 5.50E-02 |
| Smolnit | rs55944129  | C | 0.27 | -0.018 | 0.003 | 1.07E-09 | -0.005 | 0.009 | 7.10E-01 |
| Smolnit | rs58400863  | A | 0.35 | -0.020 | 0.003 | 4.82E-14 | 0.005  | 0.008 | 4.90E-01 |
| Smolnit | rs59537158  | T | 0.21 | 0.022  | 0.003 | 4.53E-13 | 0.011  | 0.009 | 2.60E-01 |
| Smolnit | rs62340589  | C | 0.20 | 0.017  | 0.003 | 4.32E-08 | 0.011  | 0.010 | 2.20E-01 |
| Smolnit | rs71602617  | T | 0.22 | -0.018 | 0.003 | 2.10E-08 | 0.001  | 0.010 | 8.10E-01 |
| Smolnit | rs7657022   | G | 0.49 | 0.018  | 0.003 | 7.16E-13 | 0.007  | 0.008 | 2.90E-01 |
| Smolnit | rs7696257   | A | 0.37 | 0.015  | 0.003 | 6.77E-09 | -0.008 | 0.008 | 3.00E-01 |
| Smolnit | rs10042827  | C | 0.68 | 0.017  | 0.003 | 9.62E-10 | 0.014  | 0.008 | 7.20E-02 |
| Smolnit | rs10060196  | A | 0.58 | 0.018  | 0.003 | 1.32E-12 | -0.017 | 0.008 | 5.10E-02 |
| Smolnit | rs10805858  | T | 0.34 | 0.018  | 0.003 | 1.87E-11 | 0.002  | 0.008 | 9.90E-01 |
| Smolnit | rs1173461   | T | 0.33 | 0.017  | 0.003 | 9.62E-10 | -0.011 | 0.008 | 1.50E-01 |
| Smolnit | rs11956866  | G | 0.57 | -0.015 | 0.003 | 7.90E-09 | -0.003 | 0.008 | 7.30E-01 |
| Smolnit | rs12517438  | G | 0.54 | 0.015  | 0.003 | 1.87E-09 | -0.002 | 0.008 | 7.80E-01 |
| Smolnit | rs1385108   | T | 0.24 | 0.019  | 0.003 | 3.83E-10 | 0.019  | 0.009 | 4.30E-02 |
| Smolnit | rs17165769  | G | 0.39 | 0.016  | 0.003 | 9.62E-10 | 0.003  | 0.008 | 6.40E-01 |
| Smolnit | rs2028269   | A | 0.40 | 0.016  | 0.003 | 5.20E-10 | -0.015 | 0.008 | 7.60E-02 |
| Smolnit | rs2173019   | A | 0.18 | 0.028  | 0.003 | 2.92E-17 | 0.020  | 0.010 | 5.70E-02 |
| Smolnit | rs329124    | G | 0.43 | -0.016 | 0.003 | 1.97E-10 | -0.017 | 0.008 | 2.90E-02 |
| Smolnit | rs35375873  | C | 0.11 | -0.027 | 0.004 | 3.28E-11 | -0.001 | 0.012 | 8.90E-01 |
| Smolnit | rs359431    | T | 0.56 | -0.014 | 0.003 | 3.17E-08 | 0.006  | 0.008 | 5.90E-01 |
| Smolnit | rs3843905   | T | 0.40 | -0.015 | 0.003 | 5.51E-09 | -0.005 | 0.008 | 5.90E-01 |
| Smolnit | rs3909281   | G | 0.54 | 0.021  | 0.003 | 1.63E-16 | 0.015  | 0.008 | 6.00E-02 |
| Smolnit | rs4044321   | G | 0.64 | -0.023 | 0.003 | 1.76E-17 | -0.013 | 0.008 | 1.60E-01 |
| Smolnit | rs42417     | T | 0.69 | 0.017  | 0.003 | 8.25E-10 | -0.006 | 0.008 | 4.80E-01 |
| Smolnit | rs6452785   | T | 0.47 | -0.027 | 0.003 | 5.92E-26 | -0.011 | 0.008 | 1.40E-01 |
| Smolnit | rs6874731   | G | 0.48 | 0.015  | 0.003 | 1.87E-09 | -0.009 | 0.008 | 2.90E-01 |
| Smolnit | rs6890961   | T | 0.62 | -0.019 | 0.003 | 2.11E-13 | 0.011  | 0.008 | 1.50E-01 |
| Smolnit | rs71592686  | C | 0.27 | 0.021  | 0.003 | 3.89E-13 | 0.001  | 0.009 | 9.30E-01 |
| Smolnit | rs72780746  | C | 0.17 | -0.026 | 0.003 | 2.03E-14 | -0.016 | 0.010 | 1.50E-01 |
| Smolnit | rs72789626  | A | 0.14 | -0.026 | 0.004 | 5.23E-12 | 0.003  | 0.011 | 8.40E-01 |
| Smolnit | rs986714    | T | 0.45 | -0.016 | 0.003 | 4.03E-10 | -0.005 | 0.008 | 6.90E-01 |
| Smolnit | rs10698713  | A | 0.05 | -0.034 | 0.006 | 2.42E-09 | 0.000  | 0.017 | 9.40E-01 |

|         |            |   |      |        |       |          |        |       |          |
|---------|------------|---|------|--------|-------|----------|--------|-------|----------|
| Smolnit | rs10945141 | A | 0.26 | 0.018  | 0.003 | 3.63E-10 | -0.008 | 0.009 | 3.00E-01 |
| Smolnit | rs1150668  | G | 0.42 | -0.019 | 0.003 | 8.34E-13 | -0.002 | 0.008 | 9.20E-01 |
| Smolnit | rs118202   | T | 0.81 | -0.037 | 0.003 | 1.86E-29 | 0.002  | 0.010 | 9.90E-01 |
| Smolnit | rs12195240 | A | 0.29 | 0.025  | 0.003 | 1.08E-18 | -0.008 | 0.009 | 3.70E-01 |
| Smolnit | rs160631   | G | 0.73 | -0.017 | 0.003 | 1.87E-09 | 0.005  | 0.009 | 6.70E-01 |
| Smolnit | rs1632941  | C | 0.46 | -0.016 | 0.003 | 6.72E-10 | -0.014 | 0.008 | 5.90E-02 |
| Smolnit | rs1737329  | G | 0.74 | 0.017  | 0.003 | 4.97E-09 | -0.004 | 0.009 | 6.40E-01 |
| Smolnit | rs17554906 | C | 0.44 | 0.014  | 0.003 | 3.17E-08 | 0.002  | 0.008 | 7.50E-01 |
| Smolnit | rs3218116  | T | 0.26 | -0.020 | 0.003 | 1.07E-11 | 0.003  | 0.009 | 9.50E-01 |
| Smolnit | rs3800227  | G | 0.74 | 0.017  | 0.003 | 3.65E-09 | -0.013 | 0.009 | 1.70E-01 |
| Smolnit | rs619087   | G | 0.42 | 0.014  | 0.003 | 3.17E-08 | -0.001 | 0.008 | 8.10E-01 |
| Smolnit | rs6568832  | A | 0.75 | 0.019  | 0.003 | 1.77E-10 | -0.015 | 0.009 | 1.10E-01 |
| Smolnit | rs6936160  | T | 0.70 | 0.020  | 0.003 | 4.30E-13 | 0.007  | 0.008 | 4.80E-01 |
| Smolnit | rs73008357 | C | 0.12 | -0.022 | 0.004 | 2.45E-08 | 0.000  | 0.012 | 9.10E-01 |
| Smolnit | rs7743165  | G | 0.50 | 0.019  | 0.003 | 4.14E-14 | 0.011  | 0.008 | 2.50E-01 |
| Smolnit | rs9331343  | C | 0.57 | -0.014 | 0.003 | 3.90E-08 | 0.011  | 0.008 | 1.40E-01 |
| Smolnit | rs10233018 | G | 0.52 | 0.025  | 0.003 | 4.73E-22 | 0.000  | 0.008 | 9.80E-01 |
| Smolnit | rs10279261 | A | 0.62 | -0.019 | 0.003 | 6.15E-13 | 0.004  | 0.008 | 8.80E-01 |
| Smolnit | rs1030015  | T | 0.52 | 0.014  | 0.003 | 2.10E-08 | -0.004 | 0.008 | 6.10E-01 |
| Smolnit | rs10953957 | A | 0.39 | 0.014  | 0.003 | 3.70E-08 | -0.004 | 0.008 | 6.20E-01 |
| Smolnit | rs11766326 | C | 0.51 | -0.018 | 0.003 | 1.78E-11 | -0.001 | 0.008 | 8.50E-01 |
| Smolnit | rs11768481 | A | 0.34 | -0.019 | 0.003 | 5.23E-12 | -0.006 | 0.008 | 5.70E-01 |
| Smolnit | rs13237637 | C | 0.49 | -0.024 | 0.003 | 1.55E-20 | -0.004 | 0.008 | 6.30E-01 |
| Smolnit | rs13437771 | G | 0.16 | -0.027 | 0.004 | 1.35E-14 | -0.042 | 0.011 | 9.10E-05 |
| Smolnit | rs1799068  | T | 0.38 | 0.017  | 0.003 | 2.54E-10 | -0.011 | 0.008 | 9.70E-02 |
| Smolnit | rs4727189  | C | 0.34 | 0.015  | 0.003 | 3.01E-08 | 0.001  | 0.008 | 9.90E-01 |
| Smolnit | rs6948707  | G | 0.42 | 0.024  | 0.003 | 4.15E-21 | 0.004  | 0.008 | 5.80E-01 |
| Smolnit | rs6968380  | A | 0.68 | -0.023 | 0.003 | 1.06E-17 | 0.002  | 0.008 | 8.70E-01 |
| Smolnit | rs76841737 | G | 0.10 | -0.023 | 0.004 | 3.34E-08 | 0.000  | 0.013 | 9.50E-01 |
| Smolnit | rs77283305 | A | 0.31 | -0.015 | 0.003 | 3.90E-08 | 0.000  | 0.008 | 9.00E-01 |
| Smolnit | rs7802996  | T | 0.17 | -0.021 | 0.003 | 1.07E-09 | -0.008 | 0.010 | 6.00E-01 |
| Smolnit | rs7809303  | A | 0.33 | -0.021 | 0.003 | 3.43E-15 | 0.022  | 0.008 | 9.50E-03 |
| Smolnit | rs11783093 | T | 0.16 | -0.047 | 0.003 | 1.77E-41 | -0.012 | 0.011 | 1.50E-01 |
| Smolnit | rs13261666 | T | 0.52 | -0.020 | 0.003 | 4.43E-15 | -0.014 | 0.008 | 5.50E-02 |
| Smolnit | rs2063976  | T | 0.66 | -0.020 | 0.003 | 7.63E-14 | 0.000  | 0.008 | 8.50E-01 |
| Smolnit | rs290601   | T | 0.27 | 0.016  | 0.003 | 1.13E-08 | -0.004 | 0.009 | 6.50E-01 |
| Smolnit | rs3850736  | G | 0.47 | 0.019  | 0.003 | 6.55E-14 | -0.013 | 0.008 | 1.40E-01 |
| Smolnit | rs4326350  | G | 0.49 | -0.018 | 0.003 | 5.23E-12 | -0.004 | 0.008 | 5.20E-01 |
| Smolnit | rs6986430  | C | 0.22 | -0.024 | 0.003 | 1.96E-15 | -0.009 | 0.009 | 3.10E-01 |
| Smolnit | rs7836565  | T | 0.72 | -0.016 | 0.003 | 4.32E-08 | 0.005  | 0.009 | 5.30E-01 |
| Smolnit | rs9987376  | G | 0.57 | -0.020 | 0.003 | 1.96E-15 | -0.018 | 0.008 | 1.50E-02 |
| Smolnit | rs10858334 | G | 0.14 | 0.023  | 0.004 | 1.18E-09 | -0.021 | 0.011 | 8.70E-02 |
| Smolnit | rs10966092 | C | 0.27 | -0.020 | 0.003 | 1.13E-12 | -0.008 | 0.009 | 3.70E-01 |
| Smolnit | rs10969352 | A | 0.50 | 0.014  | 0.003 | 1.80E-08 | -0.005 | 0.008 | 4.40E-01 |
| Smolnit | rs11791671 | T | 0.07 | 0.028  | 0.005 | 4.32E-08 | 0.001  | 0.015 | 9.00E-01 |
| Smolnit | rs1759433  | A | 0.48 | 0.015  | 0.003 | 1.69E-09 | -0.008 | 0.008 | 2.00E-01 |
| Smolnit | rs1927901  | C | 0.55 | -0.014 | 0.003 | 3.17E-08 | 0.012  | 0.008 | 1.00E-01 |
| Smolnit | rs1930371  | T | 0.24 | -0.017 | 0.003 | 7.13E-09 | 0.004  | 0.009 | 5.00E-01 |
| Smolnit | rs1931431  | C | 0.48 | 0.018  | 0.003 | 8.78E-13 | 0.006  | 0.008 | 3.30E-01 |
| Smolnit | rs2378662  | A | 0.54 | 0.015  | 0.003 | 2.68E-09 | 0.005  | 0.008 | 4.40E-01 |
| Smolnit | rs34553878 | G | 0.11 | 0.025  | 0.004 | 1.18E-09 | 0.005  | 0.013 | 5.80E-01 |
| Smolnit | rs3847244  | T | 0.47 | 0.019  | 0.003 | 2.59E-13 | -0.004 | 0.008 | 5.70E-01 |
| Smolnit | rs4837631  | T | 0.45 | -0.015 | 0.003 | 2.08E-09 | -0.014 | 0.008 | 6.70E-02 |
| Smolnit | rs4877285  | A | 0.67 | -0.018 | 0.003 | 2.07E-11 | 0.008  | 0.008 | 4.10E-01 |
| Smolnit | rs7024924  | C | 0.17 | 0.019  | 0.003 | 1.89E-08 | 0.016  | 0.010 | 1.40E-01 |
| Smolnit | rs7026534  | G | 0.70 | -0.017 | 0.003 | 2.68E-09 | -0.015 | 0.008 | 3.80E-02 |

|         |            |   |      |        |       |          |        |       |          |
|---------|------------|---|------|--------|-------|----------|--------|-------|----------|
| Smolnit | rs7867822  | G | 0.67 | -0.015 | 0.003 | 2.72E-08 | -0.004 | 0.008 | 4.90E-01 |
| Smolnit | rs10885480 | C | 0.28 | -0.019 | 0.003 | 3.83E-11 | 0.001  | 0.009 | 9.40E-01 |
| Smolnit | rs10905461 | C | 0.75 | -0.016 | 0.003 | 2.33E-08 | -0.008 | 0.009 | 3.90E-01 |
| Smolnit | rs11192347 | A | 0.10 | -0.026 | 0.004 | 6.07E-10 | -0.013 | 0.012 | 2.90E-01 |
| Smolnit | rs11258417 | T | 0.39 | -0.015 | 0.003 | 2.72E-08 | -0.004 | 0.008 | 5.50E-01 |
| Smolnit | rs11594623 | C | 0.23 | 0.027  | 0.003 | 7.42E-20 | -0.003 | 0.009 | 5.20E-01 |
| Smolnit | rs12244388 | A | 0.35 | 0.026  | 0.003 | 4.27E-22 | -0.006 | 0.008 | 5.50E-01 |
| Smolnit | rs1291821  | G | 0.53 | 0.014  | 0.003 | 1.39E-08 | 0.002  | 0.008 | 8.50E-01 |
| Smolnit | rs1733760  | C | 0.51 | 0.015  | 0.003 | 6.77E-09 | -0.008 | 0.008 | 4.30E-01 |
| Smolnit | rs2796793  | A | 0.45 | 0.014  | 0.003 | 1.54E-08 | 0.002  | 0.008 | 8.80E-01 |
| Smolnit | rs28408682 | G | 0.60 | 0.017  | 0.003 | 1.45E-10 | 0.001  | 0.008 | 8.90E-01 |
| Smolnit | rs4752018  | A | 0.23 | 0.019  | 0.003 | 4.46E-10 | 0.017  | 0.009 | 1.20E-01 |
| Smolnit | rs7072776  | G | 0.71 | -0.022 | 0.003 | 5.71E-15 | -0.013 | 0.009 | 1.90E-01 |
| Smolnit | rs7920501  | A | 0.47 | -0.016 | 0.003 | 1.24E-09 | 0.002  | 0.008 | 8.30E-01 |
| Smolnit | rs7921378  | C | 0.48 | -0.023 | 0.003 | 6.06E-20 | 0.003  | 0.008 | 5.80E-01 |
| Smolnit | rs9423279  | G | 0.65 | -0.019 | 0.003 | 2.98E-12 | -0.007 | 0.008 | 3.50E-01 |
| Smolnit | rs1106363  | T | 0.34 | 0.017  | 0.003 | 9.13E-11 | 0.009  | 0.008 | 2.20E-01 |
| Smolnit | rs1381775  | C | 0.71 | -0.016 | 0.003 | 2.86E-08 | -0.004 | 0.009 | 5.00E-01 |
| Smolnit | rs1713676  | G | 0.52 | -0.017 | 0.003 | 5.47E-11 | 0.013  | 0.008 | 1.00E-01 |
| Smolnit | rs2010921  | A | 0.31 | 0.017  | 0.003 | 2.41E-10 | -0.003 | 0.008 | 6.90E-01 |
| Smolnit | rs2155646  | C | 0.40 | 0.038  | 0.003 | 8.31E-48 | 0.002  | 0.008 | 9.50E-01 |
| Smolnit | rs238896   | A | 0.49 | -0.017 | 0.003 | 3.64E-11 | 0.015  | 0.008 | 2.90E-02 |
| Smolnit | rs2939756  | A | 0.48 | -0.016 | 0.003 | 7.45E-10 | -0.002 | 0.008 | 8.00E-01 |
| Smolnit | rs2959084  | A | 0.70 | 0.017  | 0.003 | 9.62E-10 | 0.003  | 0.009 | 5.20E-01 |
| Smolnit | rs3740977  | C | 0.17 | 0.019  | 0.003 | 1.19E-08 | -0.023 | 0.010 | 2.80E-02 |
| Smolnit | rs540860   | G | 0.54 | 0.018  | 0.003 | 5.79E-12 | -0.003 | 0.008 | 7.10E-01 |
| Smolnit | rs586699   | A | 0.54 | -0.015 | 0.003 | 7.13E-09 | 0.007  | 0.008 | 4.80E-01 |
| Smolnit | rs61884449 | T | 0.15 | 0.020  | 0.004 | 2.33E-08 | -0.005 | 0.011 | 7.20E-01 |
| Smolnit | rs61886926 | T | 0.38 | -0.018 | 0.003 | 7.47E-12 | 0.002  | 0.008 | 7.10E-01 |
| Smolnit | rs62618693 | T | 0.04 | -0.035 | 0.006 | 2.10E-08 | -0.034 | 0.019 | 1.00E-01 |
| Smolnit | rs6265     | T | 0.19 | -0.029 | 0.003 | 2.76E-19 | -0.034 | 0.010 | 1.40E-03 |
| Smolnit | rs644740   | T | 0.46 | -0.014 | 0.003 | 3.70E-08 | -0.010 | 0.008 | 2.50E-01 |
| Smolnit | rs76460663 | G | 0.04 | -0.042 | 0.006 | 4.24E-11 | 0.012  | 0.020 | 4.20E-01 |
| Smolnit | rs7929518  | G | 0.77 | 0.019  | 0.003 | 2.54E-10 | 0.008  | 0.009 | 3.40E-01 |
| Smolnit | rs7943721  | A | 0.83 | -0.021 | 0.003 | 3.63E-10 | -0.002 | 0.010 | 9.70E-01 |
| Smolnit | rs11057005 | G | 0.44 | -0.016 | 0.003 | 9.14E-10 | -0.005 | 0.008 | 4.70E-01 |
| Smolnit | rs1109480  | A | 0.38 | -0.017 | 0.003 | 1.87E-10 | -0.003 | 0.008 | 8.30E-01 |
| Smolnit | rs11611651 | A | 0.09 | 0.027  | 0.005 | 2.08E-09 | -0.012 | 0.014 | 4.40E-01 |
| Smolnit | rs13906    | T | 0.11 | -0.025 | 0.004 | 1.97E-09 | -0.006 | 0.013 | 5.90E-01 |
| Smolnit | rs4759229  | G | 0.66 | 0.016  | 0.003 | 6.43E-09 | 0.015  | 0.008 | 8.70E-02 |
| Smolnit | rs7134009  | C | 0.29 | -0.016 | 0.003 | 4.32E-08 | -0.011 | 0.009 | 2.20E-01 |
| Smolnit | rs77215829 | C | 0.13 | -0.024 | 0.004 | 2.07E-10 | -0.018 | 0.011 | 1.10E-01 |
| Smolnit | rs7969559  | G | 0.71 | -0.017 | 0.003 | 1.53E-09 | 0.001  | 0.009 | 5.40E-01 |
| Smolnit | rs1108130  | A | 0.21 | 0.024  | 0.003 | 1.58E-14 | 0.003  | 0.010 | 8.80E-01 |
| Smolnit | rs12855717 | T | 0.54 | 0.016  | 0.003 | 1.24E-09 | 0.004  | 0.008 | 6.20E-01 |
| Smolnit | rs17197663 | A | 0.13 | -0.022 | 0.004 | 2.10E-08 | 0.004  | 0.011 | 6.50E-01 |
| Smolnit | rs1772572  | A | 0.32 | -0.017 | 0.003 | 5.76E-10 | 0.013  | 0.008 | 1.40E-01 |
| Smolnit | rs4264267  | T | 0.53 | 0.015  | 0.003 | 6.77E-09 | 0.000  | 0.008 | 1.00E+00 |
| Smolnit | rs4886207  | C | 0.64 | -0.016 | 0.003 | 8.68E-10 | 0.012  | 0.008 | 2.20E-01 |
| Smolnit | rs55786907 | G | 0.16 | 0.019  | 0.003 | 1.80E-08 | 0.006  | 0.011 | 5.20E-01 |
| Smolnit | rs61959481 | A | 0.21 | -0.020 | 0.003 | 7.83E-11 | 0.010  | 0.010 | 3.50E-01 |
| Smolnit | rs7333559  | A | 0.78 | -0.023 | 0.003 | 5.91E-14 | -0.006 | 0.010 | 3.70E-01 |
| Smolnit | rs75674569 | A | 0.10 | -0.025 | 0.004 | 2.55E-09 | 0.004  | 0.013 | 6.40E-01 |
| Smolnit | rs9538162  | C | 0.42 | 0.017  | 0.003 | 1.78E-11 | -0.013 | 0.008 | 9.80E-02 |
| Smolnit | rs9540731  | T | 0.51 | -0.018 | 0.003 | 3.48E-12 | -0.008 | 0.008 | 3.50E-01 |
| Smolnit | rs9545155  | C | 0.48 | -0.016 | 0.003 | 2.96E-10 | -0.004 | 0.008 | 5.50E-01 |



|         |             |   |      |        |       |          |        |       |          |
|---------|-------------|---|------|--------|-------|----------|--------|-------|----------|
| Smolnit | rs12878369  | A | 0.41 | 0.017  | 0.003 | 1.61E-11 | 0.011  | 0.008 | 2.20E-01 |
| Smolnit | rs1381287   | T | 0.47 | 0.018  | 0.003 | 1.79E-12 | -0.004 | 0.008 | 6.20E-01 |
| Smolnit | rs1811739   | A | 0.25 | 0.018  | 0.003 | 6.07E-10 | 0.009  | 0.009 | 2.90E-01 |
| Smolnit | rs2925128   | T | 0.39 | 0.017  | 0.003 | 3.63E-10 | 0.001  | 0.008 | 9.00E-01 |
| Smolnit | rs34940743  | G | 0.35 | 0.016  | 0.003 | 2.83E-09 | 0.023  | 0.008 | 3.10E-03 |
| Smolnit | rs55913542  | T | 0.18 | 0.019  | 0.003 | 3.17E-08 | 0.009  | 0.010 | 3.20E-01 |
| Smolnit | rs8005334   | G | 0.36 | 0.017  | 0.003 | 3.45E-10 | 0.008  | 0.008 | 3.20E-01 |
| Smolnit | rs9323328   | G | 0.54 | -0.014 | 0.003 | 2.58E-08 | 0.000  | 0.008 | 1.00E+00 |
| Smolnit | rs1435672   | C | 0.56 | 0.014  | 0.003 | 3.90E-08 | 0.006  | 0.008 | 4.40E-01 |
| Smolnit | rs2289791   | T | 0.25 | -0.018 | 0.003 | 1.97E-09 | -0.006 | 0.009 | 6.10E-01 |
| Smolnit | rs281296    | A | 0.36 | 0.025  | 0.003 | 1.63E-20 | 0.000  | 0.008 | 7.20E-01 |
| Smolnit | rs4310804   | G | 0.25 | -0.018 | 0.003 | 7.45E-10 | -0.003 | 0.009 | 7.30E-01 |
| Smolnit | rs56902655  | G | 0.14 | -0.022 | 0.004 | 4.05E-09 | 0.004  | 0.011 | 6.60E-01 |
| Smolnit | rs60833441  | G | 0.46 | -0.014 | 0.003 | 2.33E-08 | -0.003 | 0.008 | 9.50E-01 |
| Smolnit | rs62007780  | T | 0.42 | -0.016 | 0.003 | 7.45E-10 | 0.001  | 0.008 | 8.80E-01 |
| Smolnit | rs8027457   | C | 0.51 | 0.015  | 0.003 | 1.87E-09 | 0.002  | 0.008 | 9.90E-01 |
| Smolnit | rs1050847   | T | 0.56 | -0.015 | 0.003 | 7.50E-09 | 0.009  | 0.008 | 3.00E-01 |
| Smolnit | rs11076962  | C | 0.28 | 0.018  | 0.003 | 1.18E-10 | 0.034  | 0.009 | 3.10E-05 |
| Smolnit | rs1139897   | A | 0.23 | -0.024 | 0.003 | 1.78E-15 | -0.018 | 0.009 | 3.20E-02 |
| Smolnit | rs11642231  | A | 0.37 | -0.016 | 0.003 | 3.47E-09 | -0.009 | 0.008 | 3.30E-01 |
| Smolnit | rs117657830 | G | 0.04 | -0.038 | 0.006 | 3.13E-09 | -0.022 | 0.019 | 1.80E-01 |
| Smolnit | rs12918191  | G | 0.24 | -0.020 | 0.003 | 3.12E-11 | 0.016  | 0.009 | 1.00E-01 |
| Smolnit | rs4785187   | A | 0.22 | 0.020  | 0.003 | 6.72E-11 | 0.010  | 0.009 | 2.90E-01 |
| Smolnit | rs4788676   | C | 0.23 | -0.018 | 0.003 | 4.97E-09 | 0.004  | 0.009 | 7.00E-01 |
| Smolnit | rs62052916  | T | 0.07 | -0.032 | 0.005 | 1.60E-10 | 0.005  | 0.015 | 7.90E-01 |
| Smolnit | rs6497840   | A | 0.71 | 0.023  | 0.003 | 1.96E-15 | 0.003  | 0.009 | 5.70E-01 |
| Smolnit | rs7188873   | G | 0.61 | 0.020  | 0.003 | 8.57E-15 | 0.015  | 0.008 | 5.10E-02 |
| Smolnit | rs7192140   | C | 0.50 | -0.017 | 0.003 | 3.46E-11 | -0.005 | 0.008 | 5.60E-01 |
| Smolnit | rs8050598   | T | 0.25 | 0.019  | 0.003 | 1.77E-10 | 0.013  | 0.009 | 2.10E-01 |
| Smolnit | rs9302604   | G | 0.44 | 0.019  | 0.003 | 3.34E-13 | 0.002  | 0.008 | 7.60E-01 |
| Smolnit | rs9922607   | T | 0.20 | -0.022 | 0.003 | 3.48E-12 | -0.002 | 0.010 | 8.00E-01 |
| Smolnit | rs9941217   | G | 0.35 | -0.019 | 0.003 | 3.48E-12 | 0.000  | 0.008 | 9.70E-01 |
| Smolnit | rs11651955  | A | 0.50 | -0.014 | 0.003 | 3.70E-08 | 0.000  | 0.008 | 7.90E-01 |
| Smolnit | rs17692129  | T | 0.33 | 0.020  | 0.003 | 4.53E-13 | -0.007 | 0.008 | 4.50E-01 |
| Smolnit | rs2344976   | C | 0.61 | -0.015 | 0.003 | 7.90E-09 | -0.009 | 0.008 | 3.10E-01 |
| Smolnit | rs2587507   | C | 0.50 | -0.015 | 0.003 | 8.75E-09 | 0.015  | 0.008 | 5.30E-02 |
| Smolnit | rs28441558  | C | 0.06 | -0.036 | 0.006 | 1.24E-10 | 0.022  | 0.016 | 1.90E-01 |
| Smolnit | rs4790874   | T | 0.53 | 0.017  | 0.003 | 8.27E-12 | -0.007 | 0.008 | 4.20E-01 |
| Smolnit | rs67777803  | T | 0.17 | -0.025 | 0.003 | 3.17E-13 | 0.006  | 0.010 | 4.60E-01 |
| Smolnit | rs75919030  | C | 0.27 | -0.021 | 0.003 | 3.34E-13 | 0.012  | 0.009 | 3.30E-01 |
| Smolnit | rs11872397  | A | 0.25 | -0.017 | 0.003 | 5.24E-09 | 0.004  | 0.009 | 6.20E-01 |
| Smolnit | rs1373178   | G | 0.59 | -0.020 | 0.003 | 4.21E-15 | -0.006 | 0.008 | 5.50E-01 |
| Smolnit | rs2359180   | G | 0.37 | -0.014 | 0.003 | 5.04E-08 | 0.000  | 0.013 | 9.70E-01 |
| Smolnit | rs34342129  | C | 0.51 | -0.014 | 0.003 | 2.10E-08 | 0.004  | 0.008 | 5.90E-01 |
| Smolnit | rs4476253   | A | 0.24 | -0.018 | 0.003 | 5.76E-10 | -0.002 | 0.009 | 9.30E-01 |
| Smolnit | rs62098013  | A | 0.37 | 0.018  | 0.003 | 2.18E-11 | -0.005 | 0.008 | 5.80E-01 |
| Smolnit | rs67050670  | G | 0.23 | -0.020 | 0.003 | 2.30E-11 | -0.030 | 0.009 | 8.30E-04 |
| Smolnit | rs71367544  | T | 0.20 | 0.021  | 0.003 | 8.67E-11 | -0.009 | 0.010 | 4.20E-01 |
| Smolnit | rs72898831  | G | 0.16 | -0.024 | 0.004 | 4.05E-12 | -0.011 | 0.010 | 3.40E-01 |
| Smolnit | rs72938304  | A | 0.11 | -0.027 | 0.004 | 1.38E-11 | 0.013  | 0.012 | 2.30E-01 |
| Smolnit | rs7505855   | T | 0.59 | -0.017 | 0.003 | 5.20E-11 | -0.005 | 0.008 | 6.20E-01 |
| Smolnit | rs8096225   | C | 0.70 | 0.016  | 0.003 | 2.58E-08 | -0.005 | 0.008 | 5.00E-01 |
| Smolnit | rs10853981  | A | 0.33 | 0.015  | 0.003 | 4.79E-08 | 0.020  | 0.008 | 2.10E-02 |
| Smolnit | rs1126757   | T | 0.47 | 0.014  | 0.003 | 2.86E-08 | 0.003  | 0.008 | 6.30E-01 |
| Smolnit | rs113230003 | A | 0.26 | -0.019 | 0.003 | 1.06E-10 | 0.011  | 0.009 | 2.10E-01 |
| Smolnit | rs117734003 | C | 0.07 | 0.030  | 0.005 | 2.55E-09 | 0.034  | 0.016 | 2.70E-02 |



|         |             |   |      |        |       |          |        |       |          |
|---------|-------------|---|------|--------|-------|----------|--------|-------|----------|
| Smolnit | rs76608582  | A | 0.05 | -0.035 | 0.006 | 4.97E-09 | -0.039 | 0.019 | 6.20E-02 |
| Smolnit | rs8103660   | C | 0.35 | 0.016  | 0.003 | 2.98E-09 | 0.002  | 0.008 | 6.90E-01 |
| Smolnit | rs3810496   | C | 0.62 | 0.016  | 0.003 | 1.53E-09 | 0.019  | 0.008 | 1.00E-02 |
| Smolnit | rs6011779   | T | 0.81 | -0.019 | 0.003 | 2.83E-09 | -0.007 | 0.010 | 5.00E-01 |
| Smolnit | rs6050446   | G | 0.97 | 0.054  | 0.008 | 8.78E-13 | 0.034  | 0.022 | 1.10E-01 |
| Smolnit | rs6073075   | A | 0.82 | -0.019 | 0.003 | 2.45E-08 | -0.013 | 0.010 | 2.00E-01 |
| Smolnit | rs910912    | C | 0.74 | -0.017 | 0.003 | 7.90E-09 | 0.013  | 0.009 | 1.50E-01 |
| Smolnit | rs4818005   | A | 0.58 | -0.020 | 0.003 | 1.10E-14 | 0.002  | 0.008 | 9.40E-01 |
| Smolnit | rs4822102   | T | 0.62 | -0.017 | 0.003 | 2.81E-10 | 0.014  | 0.008 | 6.50E-02 |
| Smolnit | rs9627272   | C | 0.41 | -0.015 | 0.003 | 2.42E-09 | 0.008  | 0.008 | 2.30E-01 |
| T2DM    | rs10159026  | C | 0.75 | 0.027  | 0.005 | 2.94E-09 | 0.009  | 0.009 | 2.40E-01 |
| T2DM    | rs10737818  | G | 0.62 | 0.035  | 0.005 | 1.29E-11 | 0.004  | 0.008 | 4.10E-01 |
| T2DM    | rs10889560  | C | 0.89 | -0.038 | 0.006 | 2.40E-09 | -0.004 | 0.014 | 8.60E-01 |
| T2DM    | rs10916780  | G | 0.25 | -0.034 | 0.005 | 1.05E-13 | 0.001  | 0.010 | 9.80E-01 |
| T2DM    | rs11240351  | G | 0.47 | 0.026  | 0.004 | 1.55E-10 | 0.004  | 0.008 | 5.10E-01 |
| T2DM    | rs1127215   | C | 0.60 | 0.041  | 0.004 | 4.37E-26 | -0.011 | 0.008 | 8.70E-02 |
| T2DM    | rs11583755  | C | 0.33 | 0.037  | 0.004 | 2.26E-19 | -0.005 | 0.008 | 6.10E-01 |
| T2DM    | rs1194592   | G | 0.47 | -0.024 | 0.004 | 5.47E-10 | -0.018 | 0.008 | 2.40E-02 |
| T2DM    | rs12041243  | G | 0.24 | -0.029 | 0.005 | 4.55E-10 | -0.023 | 0.010 | 3.30E-02 |
| T2DM    | rs12116935  | G | 0.35 | 0.024  | 0.004 | 1.82E-08 | 0.004  | 0.008 | 5.80E-01 |
| T2DM    | rs12128213  | G | 0.47 | -0.026 | 0.004 | 1.09E-09 | -0.004 | 0.008 | 4.80E-01 |
| T2DM    | rs12746673  | C | 0.21 | 0.031  | 0.005 | 3.26E-10 | 0.003  | 0.009 | 1.00E+00 |
| T2DM    | rs1327123   | G | 0.64 | -0.024 | 0.004 | 5.47E-10 | -0.003 | 0.008 | 7.50E-01 |
| T2DM    | rs145904381 | C | 0.01 | -0.161 | 0.022 | 3.56E-13 | -0.049 | 0.036 | 2.30E-01 |
| T2DM    | rs197374    | C | 0.59 | -0.022 | 0.004 | 9.27E-09 | -0.006 | 0.008 | 6.00E-01 |
| T2DM    | rs2269247   | C | 0.81 | 0.036  | 0.005 | 3.72E-13 | -0.001 | 0.010 | 9.60E-01 |
| T2DM    | rs2282456   | G | 0.72 | -0.035 | 0.004 | 6.43E-17 | 0.004  | 0.008 | 3.90E-01 |
| T2DM    | rs2453051   | C | 0.15 | 0.061  | 0.006 | 1.80E-23 | 0.000  | 0.013 | 8.90E-01 |
| T2DM    | rs2613499   | G | 0.20 | -0.036 | 0.005 | 7.43E-12 | -0.003 | 0.010 | 8.50E-01 |
| T2DM    | rs2816177   | G | 0.40 | 0.022  | 0.004 | 9.27E-09 | -0.011 | 0.008 | 1.90E-01 |
| T2DM    | rs2820446   | G | 0.30 | -0.041 | 0.004 | 3.31E-22 | -0.024 | 0.008 | 5.80E-03 |
| T2DM    | rs3020781   | G | 0.37 | 0.029  | 0.004 | 8.08E-12 | 0.024  | 0.009 | 2.50E-03 |
| T2DM    | rs340874    | C | 0.50 | 0.054  | 0.004 | 4.59E-44 | 0.015  | 0.008 | 3.50E-02 |
| T2DM    | rs348330    | G | 0.45 | 0.050  | 0.005 | 3.46E-20 | 0.012  | 0.008 | 9.80E-02 |
| T2DM    | rs3753693   | C | 0.55 | 0.026  | 0.004 | 1.83E-10 | -0.003 | 0.008 | 8.90E-01 |
| T2DM    | rs4129858   | G | 0.42 | 0.022  | 0.004 | 4.40E-09 | -0.007 | 0.008 | 3.80E-01 |
| T2DM    | rs41304257  | G | 0.24 | -0.032 | 0.005 | 1.32E-11 | -0.001 | 0.009 | 9.10E-01 |
| T2DM    | rs4655617   | C | 0.48 | 0.026  | 0.004 | 1.55E-10 | 0.013  | 0.008 | 1.00E-01 |
| T2DM    | rs4658234   | G | 0.77 | -0.030 | 0.005 | 7.28E-09 | 0.013  | 0.009 | 3.40E-01 |
| T2DM    | rs539515    | C | 0.21 | 0.036  | 0.005 | 7.10E-15 | 0.002  | 0.010 | 8.20E-01 |
| T2DM    | rs59020573  | G | 0.91 | -0.050 | 0.009 | 1.09E-08 | -0.034 | 0.023 | 1.40E-01 |
| T2DM    | rs61779284  | G | 0.80 | -0.070 | 0.005 | 1.43E-48 | -0.009 | 0.010 | 3.50E-01 |
| T2DM    | rs61817176  | C | 0.45 | -0.026 | 0.004 | 4.87E-11 | 0.000  | 0.008 | 9.60E-01 |
| T2DM    | rs7546252   | G | 0.57 | -0.026 | 0.004 | 1.66E-10 | -0.018 | 0.008 | 1.80E-02 |
| T2DM    | rs7554251   | C | 0.70 | 0.030  | 0.005 | 4.11E-11 | 0.000  | 0.009 | 9.90E-01 |
| T2DM    | rs79090772  | C | 0.10 | -0.073 | 0.007 | 2.73E-28 | -0.008 | 0.014 | 5.40E-01 |
| T2DM    | rs9438610   | G | 0.20 | -0.031 | 0.005 | 8.40E-10 | -0.003 | 0.010 | 7.40E-01 |
| T2DM    | rs10184004  | C | 0.60 | 0.064  | 0.004 | 2.87E-54 | 0.036  | 0.008 | 7.70E-06 |
| T2DM    | rs10188334  | C | 0.84 | 0.054  | 0.005 | 1.02E-24 | -0.005 | 0.010 | 6.80E-01 |
| T2DM    | rs10469860  | G | 0.28 | -0.024 | 0.004 | 3.11E-08 | -0.009 | 0.009 | 4.00E-01 |
| T2DM    | rs11096542  | G | 0.38 | -0.025 | 0.004 | 3.48E-09 | -0.014 | 0.008 | 7.40E-02 |
| T2DM    | rs113135335 | G | 0.10 | -0.053 | 0.007 | 2.85E-13 | -0.033 | 0.013 | 7.60E-03 |
| T2DM    | rs113414093 | G | 0.95 | -0.072 | 0.013 | 1.55E-08 | -0.004 | 0.021 | 9.80E-01 |
| T2DM    | rs1260326   | C | 0.58 | 0.063  | 0.004 | 8.46E-58 | -0.039 | 0.008 | 4.10E-07 |
| T2DM    | rs12986742  | C | 0.47 | 0.035  | 0.004 | 1.55E-20 | 0.011  | 0.008 | 2.30E-01 |
| T2DM    | rs13406280  | C | 0.57 | 0.027  | 0.004 | 5.29E-12 | -0.003 | 0.008 | 7.20E-01 |

|      |            |   |      |        |       |          |        |       |          |
|------|------------|---|------|--------|-------|----------|--------|-------|----------|
| T2DM | rs13415288 | C | 0.37 | 0.026  | 0.004 | 5.75E-11 | 0.018  | 0.008 | 2.30E-02 |
| T2DM | rs1877712  | G | 0.45 | 0.021  | 0.004 | 6.29E-08 | 0.018  | 0.008 | 1.50E-02 |
| T2DM | rs243018   | G | 0.50 | 0.051  | 0.004 | 8.75E-39 | -0.003 | 0.008 | 6.30E-01 |
| T2DM | rs2723065  | G | 0.38 | -0.042 | 0.004 | 2.75E-27 | -0.001 | 0.008 | 9.30E-01 |
| T2DM | rs28758542 | G | 0.34 | -0.026 | 0.004 | 1.09E-09 | -0.011 | 0.008 | 2.30E-01 |
| T2DM | rs2943650  | C | 0.36 | -0.081 | 0.004 | 7.03E-82 | -0.018 | 0.008 | 1.80E-02 |
| T2DM | rs34329895 | G | 0.54 | -0.026 | 0.004 | 1.83E-10 | -0.007 | 0.008 | 4.70E-01 |
| T2DM | rs34506349 | G | 0.96 | 0.067  | 0.012 | 9.88E-09 | 0.015  | 0.019 | 4.40E-01 |
| T2DM | rs34845373 | G | 0.26 | -0.033 | 0.005 | 3.44E-12 | -0.019 | 0.009 | 1.40E-02 |
| T2DM | rs3828242  | G | 0.27 | -0.025 | 0.004 | 4.62E-09 | -0.013 | 0.008 | 1.30E-01 |
| T2DM | rs3845843  | C | 0.49 | -0.026 | 0.004 | 3.72E-12 | 0.004  | 0.008 | 6.40E-01 |
| T2DM | rs4482463  | C | 0.24 | 0.032  | 0.006 | 1.67E-08 | 0.024  | 0.015 | 1.20E-01 |
| T2DM | rs4671799  | G | 0.67 | -0.026 | 0.004 | 5.75E-11 | 0.003  | 0.008 | 9.30E-01 |
| T2DM | rs4673712  | C | 0.29 | -0.027 | 0.005 | 2.26E-09 | -0.020 | 0.008 | 2.80E-02 |
| T2DM | rs4832290  | C | 0.76 | -0.027 | 0.005 | 5.07E-08 | -0.005 | 0.009 | 5.60E-01 |
| T2DM | rs5010712  | G | 0.81 | 0.030  | 0.005 | 4.04E-09 | -0.007 | 0.011 | 3.80E-01 |
| T2DM | rs62182438 | T | 0.26 | 0.026  | 0.005 | 1.12E-08 | -0.003 | 0.009 | 5.70E-01 |
| T2DM | rs66877183 | T | 0.43 | -0.050 | 0.009 | 2.60E-08 | -0.007 | 0.010 | 6.00E-01 |
| T2DM | rs6710938  | C | 0.23 | -0.034 | 0.005 | 1.05E-13 | -0.019 | 0.009 | 2.90E-02 |
| T2DM | rs6712905  | C | 0.32 | 0.028  | 0.004 | 3.08E-11 | -0.010 | 0.009 | 2.80E-01 |
| T2DM | rs6714523  | G | 0.88 | -0.040 | 0.006 | 4.91E-11 | 0.007  | 0.012 | 6.60E-01 |
| T2DM | rs6715901  | G | 0.57 | 0.023  | 0.004 | 8.92E-09 | 0.006  | 0.008 | 4.50E-01 |
| T2DM | rs6716394  | G | 0.48 | 0.028  | 0.004 | 1.07E-13 | 0.007  | 0.008 | 4.80E-01 |
| T2DM | rs6741676  | G | 0.31 | -0.032 | 0.004 | 1.22E-14 | -0.022 | 0.008 | 3.10E-03 |
| T2DM | rs72803684 | C | 0.96 | -0.067 | 0.012 | 6.98E-09 | 0.033  | 0.018 | 6.20E-02 |
| T2DM | rs74677818 | C | 0.86 | -0.036 | 0.006 | 2.68E-09 | -0.025 | 0.011 | 4.20E-02 |
| T2DM | rs76675804 | C | 0.09 | -0.121 | 0.007 | 6.63E-60 | -0.004 | 0.013 | 7.50E-01 |
| T2DM | rs77424687 | C | 0.70 | 0.027  | 0.005 | 2.58E-09 | 0.025  | 0.010 | 1.40E-02 |
| T2DM | rs838720   | G | 0.38 | 0.034  | 0.004 | 2.83E-18 | 0.006  | 0.008 | 4.00E-01 |
| T2DM | rs9308614  | G | 0.13 | -0.057 | 0.006 | 8.56E-23 | -0.035 | 0.011 | 4.80E-04 |
| T2DM | rs11708067 | G | 0.22 | -0.080 | 0.005 | 3.52E-58 | 0.023  | 0.009 | 1.10E-02 |
| T2DM | rs11929640 | G | 0.65 | -0.025 | 0.004 | 5.43E-09 | -0.013 | 0.009 | 1.90E-01 |
| T2DM | rs12494424 | G | 0.96 | -0.066 | 0.012 | 2.06E-08 | -0.043 | 0.020 | 1.70E-02 |
| T2DM | rs13059382 | G | 0.72 | 0.036  | 0.006 | 1.60E-09 | -0.032 | 0.015 | 2.20E-02 |
| T2DM | rs13094957 | C | 0.22 | -0.064 | 0.005 | 7.59E-42 | 0.005  | 0.010 | 6.20E-01 |
| T2DM | rs13099581 | C | 0.82 | 0.037  | 0.006 | 1.59E-10 | -0.002 | 0.011 | 9.20E-01 |
| T2DM | rs13434089 | C | 0.20 | -0.061 | 0.005 | 1.75E-31 | -0.002 | 0.012 | 8.00E-01 |
| T2DM | rs1470560  | G | 0.64 | -0.025 | 0.004 | 9.07E-10 | -0.024 | 0.008 | 8.00E-03 |
| T2DM | rs17036160 | C | 0.89 | 0.101  | 0.007 | 3.91E-54 | 0.046  | 0.012 | 2.50E-04 |
| T2DM | rs2255703  | C | 0.40 | -0.026 | 0.004 | 5.23E-11 | -0.003 | 0.008 | 7.00E-01 |
| T2DM | rs28712435 | C | 0.55 | 0.025  | 0.004 | 7.38E-11 | -0.003 | 0.008 | 5.40E-01 |
| T2DM | rs2872246  | C | 0.60 | -0.027 | 0.004 | 2.93E-11 | -0.010 | 0.008 | 1.90E-01 |
| T2DM | rs3872707  | G | 0.84 | -0.037 | 0.005 | 7.29E-12 | -0.008 | 0.012 | 6.00E-01 |
| T2DM | rs56243018 | C | 0.05 | -0.083 | 0.010 | 1.15E-15 | -0.010 | 0.018 | 6.30E-01 |
| T2DM | rs59489841 | C | 0.70 | 0.024  | 0.004 | 2.20E-08 | 0.009  | 0.009 | 3.00E-01 |
| T2DM | rs61579137 | G | 0.66 | -0.031 | 0.005 | 4.88E-11 | -0.011 | 0.011 | 2.80E-01 |
| T2DM | rs62255926 | T | 0.26 | -0.025 | 0.005 | 4.30E-08 | -0.008 | 0.008 | 2.60E-01 |
| T2DM | rs62271373 | T | 0.95 | -0.065 | 0.010 | 1.70E-10 | -0.046 | 0.017 | 6.40E-03 |
| T2DM | rs6549112  | G | 0.33 | -0.027 | 0.004 | 2.08E-11 | -0.012 | 0.008 | 2.20E-01 |
| T2DM | rs667920   | G | 0.23 | -0.032 | 0.005 | 6.02E-13 | -0.016 | 0.009 | 1.10E-01 |
| T2DM | rs66815886 | G | 0.69 | 0.040  | 0.004 | 1.67E-21 | 0.009  | 0.009 | 3.70E-01 |
| T2DM | rs6766859  | C | 0.39 | 0.028  | 0.004 | 6.20E-12 | 0.000  | 0.008 | 8.40E-01 |
| T2DM | rs6777684  | G | 0.63 | 0.055  | 0.004 | 1.32E-35 | 0.002  | 0.008 | 8.30E-01 |
| T2DM | rs6792892  | C | 0.48 | 0.031  | 0.004 | 2.01E-14 | 0.020  | 0.008 | 6.80E-03 |
| T2DM | rs73146095 | C | 0.90 | 0.041  | 0.007 | 6.63E-09 | 0.001  | 0.012 | 7.20E-01 |
| T2DM | rs76263492 | G | 0.96 | -0.068 | 0.011 | 3.20E-09 | -0.012 | 0.019 | 6.70E-01 |

|      |             |   |      |        |       |           |        |       |          |
|------|-------------|---|------|--------|-------|-----------|--------|-------|----------|
| T2DM | rs7633673   | G | 0.59 | 0.031  | 0.004 | 8.10E-16  | 0.005  | 0.008 | 4.80E-01 |
| T2DM | rs7645613   | C | 0.36 | 0.034  | 0.005 | 1.41E-12  | 0.005  | 0.012 | 7.80E-01 |
| T2DM | rs8192675   | C | 0.32 | -0.045 | 0.004 | 5.21E-27  | 0.014  | 0.009 | 5.30E-02 |
| T2DM | rs853866    | T | 0.61 | 0.024  | 0.004 | 2.93E-08  | 0.003  | 0.008 | 7.70E-01 |
| T2DM | rs924753    | G | 0.46 | 0.026  | 0.004 | 1.55E-11  | 0.015  | 0.008 | 5.30E-02 |
| T2DM | rs978444    | G | 0.41 | 0.023  | 0.004 | 4.31E-09  | 0.011  | 0.008 | 1.10E-01 |
| T2DM | rs9814945   | C | 0.71 | -0.032 | 0.005 | 4.60E-11  | 0.011  | 0.009 | 1.70E-01 |
| T2DM | rs9857204   | G | 0.71 | -0.027 | 0.004 | 2.52E-10  | -0.012 | 0.008 | 1.60E-01 |
| T2DM | rs9859406   | G | 0.65 | -0.112 | 0.004 | 1.33E-171 | -0.001 | 0.008 | 7.70E-01 |
| T2DM | rs9869477   | G | 0.56 | 0.023  | 0.004 | 2.72E-09  | 0.010  | 0.008 | 2.20E-01 |
| T2DM | rs9872347   | C | 0.67 | 0.032  | 0.004 | 3.69E-14  | 0.001  | 0.008 | 9.70E-01 |
| T2DM | rs9873519   | C | 0.53 | -0.037 | 0.004 | 9.63E-23  | -0.005 | 0.008 | 4.30E-01 |
| T2DM | rs10937721  | G | 0.39 | -0.076 | 0.004 | 5.15E-69  | -0.003 | 0.008 | 6.60E-01 |
| T2DM | rs10938398  | G | 0.61 | -0.045 | 0.004 | 3.72E-30  | -0.017 | 0.008 | 3.60E-02 |
| T2DM | rs12505942  | C | 0.31 | -0.029 | 0.004 | 2.56E-12  | -0.015 | 0.008 | 7.10E-02 |
| T2DM | rs13107325  | C | 0.93 | -0.047 | 0.009 | 3.80E-08  | -0.011 | 0.015 | 4.00E-01 |
| T2DM | rs17035289  | C | 0.21 | 0.036  | 0.005 | 1.03E-13  | 0.007  | 0.011 | 5.10E-01 |
| T2DM | rs1996617   | C | 0.39 | 0.029  | 0.004 | 5.01E-13  | -0.007 | 0.008 | 2.60E-01 |
| T2DM | rs2125799   | C | 0.33 | 0.024  | 0.004 | 2.66E-09  | 0.003  | 0.008 | 5.90E-01 |
| T2DM | rs2169033   | C | 0.34 | -0.033 | 0.004 | 2.25E-15  | -0.024 | 0.008 | 3.60E-03 |
| T2DM | rs28408270  | G | 0.49 | 0.024  | 0.004 | 8.89E-10  | -0.001 | 0.008 | 9.70E-01 |
| T2DM | rs28819812  | C | 0.66 | 0.033  | 0.004 | 3.93E-15  | 0.018  | 0.008 | 3.10E-02 |
| T2DM | rs2952858   | G | 0.60 | -0.024 | 0.004 | 7.45E-09  | 0.000  | 0.009 | 9.90E-01 |
| T2DM | rs34617913  | G | 0.30 | -0.024 | 0.004 | 2.73E-08  | -0.009 | 0.009 | 4.30E-01 |
| T2DM | rs35901985  | G | 0.19 | -0.033 | 0.005 | 3.75E-10  | -0.008 | 0.010 | 4.00E-01 |
| T2DM | rs362307    | C | 0.93 | -0.048 | 0.009 | 3.44E-08  | 0.009  | 0.015 | 7.00E-01 |
| T2DM | rs4440243   | C | 0.42 | -0.025 | 0.004 | 1.06E-08  | 0.014  | 0.008 | 7.20E-02 |
| T2DM | rs4833687   | C | 0.74 | -0.027 | 0.005 | 2.97E-09  | -0.008 | 0.009 | 4.30E-01 |
| T2DM | rs4834232   | C | 0.79 | -0.027 | 0.005 | 7.16E-09  | 0.001  | 0.009 | 9.80E-01 |
| T2DM | rs55691245  | G | 0.87 | 0.056  | 0.006 | 1.86E-18  | 0.006  | 0.011 | 6.30E-01 |
| T2DM | rs56337234  | C | 0.50 | 0.043  | 0.004 | 2.75E-25  | -0.003 | 0.008 | 6.30E-01 |
| T2DM | rs6813195   | C | 0.65 | 0.046  | 0.004 | 5.52E-31  | -0.009 | 0.009 | 3.10E-01 |
| T2DM | rs6835992   | G | 0.70 | 0.029  | 0.004 | 6.90E-11  | -0.008 | 0.008 | 3.70E-01 |
| T2DM | rs730831    | G | 0.19 | -0.088 | 0.007 | 3.33E-34  | -0.032 | 0.021 | 1.10E-01 |
| T2DM | rs73221116  | G | 0.96 | -0.096 | 0.011 | 2.07E-19  | 0.015  | 0.020 | 5.00E-01 |
| T2DM | rs7659468   | G | 0.50 | -0.029 | 0.004 | 8.71E-15  | -0.004 | 0.008 | 5.40E-01 |
| T2DM | rs7664347   | C | 0.66 | -0.023 | 0.004 | 1.15E-08  | -0.003 | 0.008 | 8.10E-01 |
| T2DM | rs7674402   | G | 0.77 | -0.052 | 0.006 | 3.04E-16  | -0.013 | 0.020 | 4.30E-01 |
| T2DM | rs993380    | G | 0.64 | -0.027 | 0.004 | 3.07E-12  | -0.012 | 0.008 | 1.40E-01 |
| T2DM | rs9991328   | C | 0.48 | -0.023 | 0.004 | 2.32E-09  | -0.015 | 0.008 | 4.10E-02 |
| T2DM | rs114136102 | C | 0.04 | 0.063  | 0.011 | 3.11E-08  | 0.027  | 0.020 | 1.30E-01 |
| T2DM | rs12187734  | C | 0.57 | 0.029  | 0.004 | 1.85E-13  | 0.005  | 0.008 | 5.80E-01 |
| T2DM | rs144052331 | C | 0.05 | -0.071 | 0.010 | 4.67E-13  | -0.067 | 0.024 | 8.10E-03 |
| T2DM | rs1650505   | G | 0.77 | -0.041 | 0.005 | 1.00E-19  | -0.023 | 0.010 | 1.80E-02 |
| T2DM | rs217256    | C | 0.49 | 0.021  | 0.004 | 1.38E-08  | 0.005  | 0.008 | 6.60E-01 |
| T2DM | rs2591392   | G | 0.62 | 0.031  | 0.004 | 4.29E-15  | 0.009  | 0.008 | 1.50E-01 |
| T2DM | rs261967    | C | 0.41 | 0.024  | 0.004 | 6.24E-10  | 0.001  | 0.008 | 9.20E-01 |
| T2DM | rs2662390   | C | 0.74 | -0.028 | 0.005 | 8.92E-09  | 0.008  | 0.011 | 4.90E-01 |
| T2DM | rs2913873   | G | 0.14 | -0.032 | 0.006 | 1.67E-08  | -0.008 | 0.011 | 4.40E-01 |
| T2DM | rs302395    | G | 0.32 | 0.023  | 0.004 | 1.53E-08  | 0.010  | 0.008 | 1.40E-01 |
| T2DM | rs329118    | C | 0.58 | -0.028 | 0.004 | 1.42E-13  | 0.017  | 0.008 | 3.00E-02 |
| T2DM | rs34341     | T | 0.52 | 0.040  | 0.004 | 4.98E-25  | 0.014  | 0.008 | 5.70E-02 |
| T2DM | rs4343858   | G | 0.72 | 0.030  | 0.005 | 5.54E-11  | 0.016  | 0.009 | 7.50E-02 |
| T2DM | rs4479849   | G | 0.59 | -0.026 | 0.004 | 3.71E-11  | -0.005 | 0.008 | 5.90E-01 |
| T2DM | rs464605    | C | 0.35 | -0.070 | 0.004 | 2.35E-65  | -0.013 | 0.009 | 1.70E-01 |
| T2DM | rs4865796   | G | 0.29 | -0.048 | 0.004 | 2.29E-30  | -0.025 | 0.008 | 2.10E-03 |

|      |             |   |      |        |       |           |        |       |          |
|------|-------------|---|------|--------|-------|-----------|--------|-------|----------|
| T2DM | rs4976033   | G | 0.43 | 0.025  | 0.004 | 1.23E-10  | 0.012  | 0.008 | 1.60E-01 |
| T2DM | rs6870983   | C | 0.74 | 0.029  | 0.005 | 4.71E-09  | 0.007  | 0.010 | 4.20E-01 |
| T2DM | rs6885157   | G | 0.78 | 0.037  | 0.007 | 4.49E-08  | -0.005 | 0.012 | 7.20E-01 |
| T2DM | rs6897117   | C | 0.71 | -0.023 | 0.004 | 2.53E-08  | -0.004 | 0.008 | 6.70E-01 |
| T2DM | rs75432112  | G | 0.95 | -0.132 | 0.010 | 7.38E-37  | -0.030 | 0.018 | 1.00E-01 |
| T2DM | rs7732130   | G | 0.30 | 0.055  | 0.005 | 4.54E-32  | 0.010  | 0.008 | 2.20E-01 |
| T2DM | rs10440833  | T | 0.70 | -0.129 | 0.004 | 5.91E-216 | 0.000  | 0.009 | 9.20E-01 |
| T2DM | rs10806906  | C | 0.45 | 0.022  | 0.004 | 1.08E-08  | 0.014  | 0.008 | 1.10E-01 |
| T2DM | rs11155073  | C | 0.52 | -0.028 | 0.004 | 1.77E-12  | -0.014 | 0.008 | 5.30E-02 |
| T2DM | rs11759026  | G | 0.32 | 0.059  | 0.006 | 1.03E-24  | 0.000  | 0.009 | 8.70E-01 |
| T2DM | rs16881572  | G | 0.94 | -0.068 | 0.011 | 5.98E-10  | -0.006 | 0.023 | 8.70E-01 |
| T2DM | rs2031847   | G | 0.97 | -0.075 | 0.013 | 1.57E-08  | -0.016 | 0.028 | 5.60E-01 |
| T2DM | rs2394186   | G | 0.22 | -0.027 | 0.005 | 1.64E-08  | -0.021 | 0.010 | 6.60E-02 |
| T2DM | rs2608953   | C | 0.79 | -0.035 | 0.005 | 3.40E-12  | -0.009 | 0.010 | 4.90E-01 |
| T2DM | rs2876354   | C | 0.52 | 0.047  | 0.004 | 1.98E-34  | 0.001  | 0.008 | 8.10E-01 |
| T2DM | rs3130931   | C | 0.68 | 0.048  | 0.004 | 6.57E-32  | 0.006  | 0.008 | 4.60E-01 |
| T2DM | rs33959228  | C | 0.98 | 0.092  | 0.016 | 3.56E-09  | -0.010 | 0.027 | 6.40E-01 |
| T2DM | rs34247110  | G | 0.52 | -0.031 | 0.004 | 1.00E-15  | -0.010 | 0.008 | 1.60E-01 |
| T2DM | rs34298980  | C | 0.47 | -0.035 | 0.006 | 1.22E-10  | -0.014 | 0.008 | 5.80E-02 |
| T2DM | rs35164294  | G | 0.93 | -0.053 | 0.009 | 1.15E-08  | 0.007  | 0.016 | 7.40E-01 |
| T2DM | rs3798519   | C | 0.21 | 0.047  | 0.005 | 6.43E-24  | -0.009 | 0.010 | 3.80E-01 |
| T2DM | rs4709746   | C | 0.87 | 0.057  | 0.006 | 1.01E-21  | 0.029  | 0.011 | 1.80E-02 |
| T2DM | rs501470    | G | 0.46 | -0.032 | 0.004 | 3.73E-17  | -0.003 | 0.008 | 7.20E-01 |
| T2DM | rs538801    | T | 0.43 | -0.021 | 0.004 | 6.29E-08  | -0.011 | 0.008 | 1.50E-01 |
| T2DM | rs727734    | T | 0.24 | -0.029 | 0.005 | 8.65E-11  | -0.014 | 0.009 | 1.60E-01 |
| T2DM | rs72846863  | G | 0.86 | 0.034  | 0.006 | 3.98E-08  | 0.023  | 0.011 | 4.00E-02 |
| T2DM | rs75080135  | C | 0.21 | -0.036 | 0.005 | 3.20E-13  | -0.018 | 0.010 | 7.80E-02 |
| T2DM | rs7742292   | C | 0.48 | 0.026  | 0.004 | 6.80E-11  | 0.000  | 0.008 | 9.70E-01 |
| T2DM | rs7752666   | C | 0.70 | 0.031  | 0.004 | 1.31E-12  | 0.024  | 0.008 | 3.20E-03 |
| T2DM | rs7758002   | G | 0.52 | -0.032 | 0.004 | 4.36E-16  | -0.009 | 0.008 | 4.50E-01 |
| T2DM | rs7758115   | G | 0.50 | -0.023 | 0.004 | 2.70E-09  | 0.005  | 0.008 | 6.10E-01 |
| T2DM | rs80196932  | C | 0.18 | -0.048 | 0.005 | 1.60E-19  | 0.000  | 0.011 | 9.20E-01 |
| T2DM | rs9257408   | G | 0.49 | -0.031 | 0.005 | 1.47E-10  | -0.012 | 0.008 | 9.30E-02 |
| T2DM | rs9358912   | G | 0.65 | 0.025  | 0.005 | 3.14E-08  | 0.020  | 0.009 | 1.30E-02 |
| T2DM | rs9370243   | G | 0.83 | -0.039 | 0.006 | 1.05E-10  | -0.023 | 0.014 | 8.80E-02 |
| T2DM | rs9379084   | G | 0.84 | 0.072  | 0.006 | 9.07E-31  | 0.003  | 0.013 | 7.10E-01 |
| T2DM | rs9390022   | C | 0.34 | -0.031 | 0.004 | 8.43E-14  | 0.000  | 0.008 | 8.90E-01 |
| T2DM | rs9449295   | C | 0.52 | 0.022  | 0.004 | 3.05E-08  | 0.020  | 0.008 | 2.10E-02 |
| T2DM | rs9472139   | G | 0.74 | -0.038 | 0.004 | 1.28E-17  | 0.000  | 0.009 | 9.20E-01 |
| T2DM | rs10228796  | G | 0.57 | 0.067  | 0.004 | 5.55E-70  | 0.001  | 0.008 | 7.30E-01 |
| T2DM | rs12539264  | G | 0.27 | 0.029  | 0.005 | 1.16E-10  | 0.004  | 0.009 | 4.70E-01 |
| T2DM | rs12667919  | C | 0.71 | -0.026 | 0.005 | 5.13E-08  | 0.002  | 0.009 | 8.20E-01 |
| T2DM | rs12669521  | G | 0.30 | -0.026 | 0.004 | 2.27E-09  | -0.017 | 0.008 | 3.90E-02 |
| T2DM | rs13237518  | C | 0.52 | -0.028 | 0.004 | 9.52E-14  | -0.010 | 0.008 | 1.90E-01 |
| T2DM | rs13238568  | G | 0.38 | 0.025  | 0.004 | 1.46E-09  | 0.012  | 0.008 | 1.50E-01 |
| T2DM | rs17439448  | C | 0.88 | -0.039 | 0.007 | 4.47E-09  | -0.001 | 0.012 | 8.70E-01 |
| T2DM | rs187653072 | C | 0.03 | 0.097  | 0.014 | 2.43E-12  | 0.020  | 0.022 | 2.90E-01 |
| T2DM | rs1922879   | G | 0.63 | 0.023  | 0.004 | 2.03E-08  | 0.015  | 0.008 | 5.00E-02 |
| T2DM | rs2188848   | G | 0.21 | -0.033 | 0.005 | 1.28E-11  | 0.017  | 0.010 | 5.90E-02 |
| T2DM | rs243513    | G | 0.71 | 0.023  | 0.004 | 6.84E-08  | 0.004  | 0.008 | 7.60E-01 |
| T2DM | rs3735491   | C | 0.69 | -0.025 | 0.004 | 6.10E-09  | -0.005 | 0.009 | 6.90E-01 |
| T2DM | rs3779272   | T | 0.58 | 0.021  | 0.004 | 2.08E-08  | 0.004  | 0.008 | 6.60E-01 |
| T2DM | rs38221     | C | 0.76 | -0.029 | 0.005 | 1.16E-09  | 0.005  | 0.009 | 8.20E-01 |
| T2DM | rs3996350   | G | 0.56 | 0.035  | 0.004 | 5.72E-19  | 0.011  | 0.008 | 8.70E-02 |
| T2DM | rs4252505   | G | 0.18 | 0.041  | 0.007 | 3.64E-09  | 0.016  | 0.016 | 3.10E-01 |
| T2DM | rs506597    | G | 0.88 | 0.041  | 0.006 | 1.49E-10  | -0.007 | 0.012 | 6.40E-01 |

|      |             |   |      |        |       |           |        |       |          |
|------|-------------|---|------|--------|-------|-----------|--------|-------|----------|
| T2DM | rs583769    | G | 0.72 | -0.031 | 0.004 | 9.36E-13  | -0.009 | 0.009 | 3.20E-01 |
| T2DM | rs60251368  | G | 0.07 | 0.055  | 0.008 | 1.94E-12  | 0.015  | 0.018 | 5.50E-01 |
| T2DM | rs62452060  | G | 0.86 | -0.035 | 0.006 | 1.97E-09  | -0.001 | 0.011 | 8.60E-01 |
| T2DM | rs62492368  | G | 0.60 | -0.031 | 0.004 | 3.32E-14  | -0.007 | 0.009 | 3.80E-01 |
| T2DM | rs6946660   | C | 0.41 | -0.047 | 0.004 | 1.02E-33  | -0.008 | 0.008 | 4.30E-01 |
| T2DM | rs6956980   | C | 0.47 | 0.028  | 0.004 | 7.80E-14  | -0.003 | 0.008 | 5.90E-01 |
| T2DM | rs6972291   | C | 0.35 | 0.028  | 0.005 | 3.73E-09  | 0.008  | 0.010 | 2.60E-01 |
| T2DM | rs6975279   | C | 0.71 | -0.043 | 0.004 | 1.05E-24  | -0.022 | 0.009 | 8.70E-03 |
| T2DM | rs6976111   | C | 0.72 | -0.026 | 0.005 | 2.04E-08  | -0.003 | 0.008 | 7.00E-01 |
| T2DM | rs6978327   | C | 0.41 | -0.023 | 0.004 | 5.71E-09  | -0.007 | 0.008 | 3.80E-01 |
| T2DM | rs730497    | G | 0.83 | -0.055 | 0.005 | 2.45E-28  | 0.012  | 0.010 | 3.20E-01 |
| T2DM | rs73121277  | C | 0.30 | 0.026  | 0.004 | 6.00E-10  | 0.007  | 0.009 | 4.60E-01 |
| T2DM | rs73184014  | G | 0.21 | -0.030 | 0.005 | 1.00E-08  | 0.000  | 0.009 | 8.50E-01 |
| T2DM | rs860262    | C | 0.57 | 0.075  | 0.004 | 8.99E-82  | 0.021  | 0.008 | 9.70E-03 |
| T2DM | rs917195    | C | 0.72 | 0.042  | 0.005 | 3.04E-20  | 0.014  | 0.009 | 1.00E-01 |
| T2DM | rs10096633  | C | 0.82 | 0.033  | 0.005 | 9.89E-10  | 0.012  | 0.012 | 3.10E-01 |
| T2DM | rs10101067  | G | 0.91 | -0.039 | 0.007 | 1.46E-08  | -0.029 | 0.015 | 4.00E-02 |
| T2DM | rs10808671  | G | 0.54 | -0.036 | 0.004 | 4.47E-21  | -0.007 | 0.008 | 3.20E-01 |
| T2DM | rs112515915 | G | 0.07 | -0.056 | 0.009 | 3.80E-11  | -0.003 | 0.015 | 8.50E-01 |
| T2DM | rs11994255  | C | 0.72 | -0.024 | 0.004 | 2.73E-08  | -0.011 | 0.009 | 2.40E-01 |
| T2DM | rs11998023  | G | 0.18 | 0.032  | 0.005 | 9.76E-10  | 0.008  | 0.010 | 4.00E-01 |
| T2DM | rs12056338  | G | 0.61 | -0.025 | 0.004 | 3.50E-10  | 0.008  | 0.008 | 2.50E-01 |
| T2DM | rs12680217  | C | 0.30 | -0.040 | 0.007 | 2.25E-08  | -0.002 | 0.017 | 9.60E-01 |
| T2DM | rs13262861  | C | 0.83 | 0.102  | 0.005 | 9.91E-80  | -0.017 | 0.010 | 1.50E-01 |
| T2DM | rs13266634  | C | 0.68 | 0.102  | 0.004 | 1.13E-137 | -0.006 | 0.008 | 6.50E-01 |
| T2DM | rs13268508  | C | 0.63 | -0.038 | 0.004 | 4.70E-20  | 0.012  | 0.008 | 1.30E-01 |
| T2DM | rs13365225  | G | 0.26 | 0.033  | 0.005 | 1.17E-12  | 0.011  | 0.011 | 3.10E-01 |
| T2DM | rs1561927   | C | 0.31 | 0.033  | 0.005 | 5.30E-13  | 0.004  | 0.009 | 4.80E-01 |
| T2DM | rs17772814  | G | 0.92 | 0.069  | 0.012 | 3.31E-08  | -0.013 | 0.015 | 3.40E-01 |
| T2DM | rs2679745   | G | 0.81 | 0.028  | 0.005 | 1.40E-08  | 0.017  | 0.010 | 1.00E-01 |
| T2DM | rs2725370   | C | 0.71 | -0.032 | 0.005 | 4.07E-12  | -0.005 | 0.008 | 4.60E-01 |
| T2DM | rs28792187  | G | 0.07 | 0.041  | 0.008 | 5.11E-08  | 0.000  | 0.016 | 9.20E-01 |
| T2DM | rs35753840  | C | 0.34 | 0.025  | 0.004 | 1.47E-09  | 0.012  | 0.008 | 1.40E-01 |
| T2DM | rs3802219   | C | 0.61 | -0.036 | 0.004 | 5.49E-20  | -0.019 | 0.008 | 1.50E-02 |
| T2DM | rs3887059   | G | 0.74 | -0.030 | 0.004 | 6.86E-12  | 0.001  | 0.009 | 8.50E-01 |
| T2DM | rs4294149   | C | 0.60 | -0.022 | 0.004 | 2.64E-08  | -0.011 | 0.008 | 1.20E-01 |
| T2DM | rs510062    | G | 0.40 | -0.022 | 0.004 | 1.69E-08  | -0.003 | 0.008 | 7.40E-01 |
| T2DM | rs60384372  | G | 0.45 | -0.035 | 0.004 | 5.25E-17  | -0.005 | 0.008 | 5.50E-01 |
| T2DM | rs6558173   | G | 0.66 | -0.025 | 0.004 | 9.07E-10  | 0.004  | 0.008 | 6.10E-01 |
| T2DM | rs10119430  | G | 0.22 | 0.028  | 0.005 | 1.32E-09  | -0.003 | 0.010 | 7.20E-01 |
| T2DM | rs10758950  | T | 0.71 | -0.026 | 0.005 | 7.57E-09  | -0.018 | 0.010 | 1.10E-01 |
| T2DM | rs10811661  | C | 0.24 | -0.147 | 0.005 | 3.00E-206 | 0.003  | 0.010 | 7.10E-01 |
| T2DM | rs10818763  | C | 0.68 | 0.036  | 0.005 | 2.22E-12  | 0.024  | 0.012 | 6.10E-02 |
| T2DM | rs10993072  | C | 0.66 | -0.032 | 0.004 | 1.55E-14  | -0.004 | 0.008 | 7.10E-01 |
| T2DM | rs12001437  | C | 0.41 | 0.030  | 0.004 | 2.36E-15  | 0.028  | 0.008 | 3.80E-04 |
| T2DM | rs12380322  | G | 0.39 | 0.030  | 0.004 | 1.64E-13  | -0.023 | 0.008 | 3.80E-03 |
| T2DM | rs1412234   | C | 0.29 | 0.040  | 0.004 | 3.31E-21  | 0.004  | 0.008 | 7.20E-01 |
| T2DM | rs1431819   | G | 0.71 | 0.029  | 0.005 | 1.64E-10  | 0.007  | 0.009 | 3.40E-01 |
| T2DM | rs1567353   | G | 0.36 | 0.028  | 0.004 | 3.65E-12  | 0.004  | 0.008 | 7.10E-01 |
| T2DM | rs1570247   | G | 0.60 | 0.024  | 0.004 | 3.94E-10  | -0.014 | 0.008 | 7.00E-02 |
| T2DM | rs1885234   | G | 0.39 | 0.024  | 0.004 | 3.94E-10  | 0.009  | 0.008 | 2.10E-01 |
| T2DM | rs2150999   | C | 0.54 | 0.024  | 0.004 | 4.64E-10  | -0.008 | 0.008 | 3.00E-01 |
| T2DM | rs2796441   | G | 0.56 | 0.061  | 0.004 | 5.72E-55  | -0.015 | 0.008 | 5.10E-02 |
| T2DM | rs28642213  | G | 0.76 | 0.082  | 0.005 | 1.73E-68  | 0.010  | 0.009 | 3.30E-01 |
| T2DM | rs379417    | G | 0.65 | -0.028 | 0.004 | 3.62E-11  | -0.004 | 0.009 | 5.60E-01 |
| T2DM | rs4237150   | G | 0.57 | -0.043 | 0.004 | 1.23E-31  | 0.006  | 0.008 | 4.60E-01 |

|      |             |   |      |        |       |           |        |       |          |
|------|-------------|---|------|--------|-------|-----------|--------|-------|----------|
| T2DM | rs529565    | C | 0.36 | 0.042  | 0.004 | 1.92E-26  | 0.023  | 0.008 | 4.70E-03 |
| T2DM | rs654629    | G | 0.61 | 0.027  | 0.004 | 9.07E-12  | -0.009 | 0.008 | 2.70E-01 |
| T2DM | rs6597649   | C | 0.52 | -0.023 | 0.004 | 1.97E-09  | -0.019 | 0.008 | 8.80E-03 |
| T2DM | rs67269808  | G | 0.07 | -0.073 | 0.008 | 7.13E-21  | -0.028 | 0.016 | 9.50E-02 |
| T2DM | rs7029718   | G | 0.60 | -0.027 | 0.004 | 2.56E-12  | -0.002 | 0.008 | 7.10E-01 |
| T2DM | rs73642097  | G | 0.21 | 0.029  | 0.005 | 2.87E-09  | 0.002  | 0.011 | 9.20E-01 |
| T2DM | rs75619936  | G | 0.13 | 0.031  | 0.006 | 2.06E-08  | 0.011  | 0.013 | 4.20E-01 |
| T2DM | rs9411425   | G | 0.35 | 0.024  | 0.004 | 3.64E-09  | 0.014  | 0.008 | 4.00E-02 |
| T2DM | rs10787518  | T | 0.45 | 0.029  | 0.005 | 1.03E-08  | 0.019  | 0.008 | 2.70E-02 |
| T2DM | rs10998338  | G | 0.52 | -0.031 | 0.004 | 2.85E-15  | -0.002 | 0.008 | 8.90E-01 |
| T2DM | rs1111875   | C | 0.55 | 0.093  | 0.004 | 1.02E-131 | 0.030  | 0.008 | 3.00E-05 |
| T2DM | rs111765639 | G | 0.88 | 0.058  | 0.008 | 4.62E-12  | -0.037 | 0.022 | 7.40E-02 |
| T2DM | rs11199116  | C | 0.19 | 0.031  | 0.005 | 9.36E-10  | 0.001  | 0.010 | 9.40E-01 |
| T2DM | rs11257655  | C | 0.70 | -0.095 | 0.006 | 5.08E-64  | -0.016 | 0.010 | 9.60E-02 |
| T2DM | rs11258422  | C | 0.41 | 0.024  | 0.004 | 4.15E-09  | -0.004 | 0.008 | 5.70E-01 |
| T2DM | rs1408579   | C | 0.56 | 0.028  | 0.004 | 5.85E-11  | 0.019  | 0.008 | 1.60E-02 |
| T2DM | rs146716733 | C | 0.92 | 0.045  | 0.008 | 1.14E-08  | 0.010  | 0.018 | 6.60E-01 |
| T2DM | rs2280141   | G | 0.51 | -0.046 | 0.005 | 2.56E-21  | -0.020 | 0.008 | 8.60E-03 |
| T2DM | rs2482506   | G | 0.24 | -0.032 | 0.005 | 2.18E-12  | 0.004  | 0.009 | 6.20E-01 |
| T2DM | rs2633311   | C | 0.50 | 0.024  | 0.004 | 3.12E-09  | 0.010  | 0.008 | 3.00E-01 |
| T2DM | rs3012060   | T | 0.19 | 0.034  | 0.006 | 5.03E-10  | 0.022  | 0.012 | 4.90E-02 |
| T2DM | rs3122231   | C | 0.66 | 0.027  | 0.004 | 7.32E-10  | 0.014  | 0.008 | 1.10E-01 |
| T2DM | rs35011184  | G | 0.78 | -0.251 | 0.005 | 0.00E+00  | -0.001 | 0.009 | 9.40E-01 |
| T2DM | rs36062478  | C | 0.18 | 0.039  | 0.005 | 5.86E-13  | 0.008  | 0.011 | 6.30E-01 |
| T2DM | rs524903    | G | 0.82 | 0.043  | 0.007 | 1.68E-10  | 0.028  | 0.010 | 1.70E-02 |
| T2DM | rs620191    | G | 0.66 | -0.023 | 0.004 | 1.15E-08  | -0.001 | 0.009 | 8.00E-01 |
| T2DM | rs697239    | C | 0.45 | -0.059 | 0.004 | 7.86E-54  | 0.001  | 0.008 | 8.20E-01 |
| T2DM | rs705145    | C | 0.65 | -0.023 | 0.004 | 1.97E-09  | 0.008  | 0.008 | 2.80E-01 |
| T2DM | rs7071036   | C | 0.20 | -0.051 | 0.007 | 2.82E-12  | 0.009  | 0.027 | 7.40E-01 |
| T2DM | rs71495046  | C | 0.12 | 0.040  | 0.006 | 2.40E-10  | 0.012  | 0.014 | 4.70E-01 |
| T2DM | rs7912336   | T | 0.55 | 0.022  | 0.004 | 1.13E-08  | 0.013  | 0.008 | 1.10E-01 |
| T2DM | rs827237    | C | 0.81 | -0.029 | 0.005 | 2.90E-08  | -0.007 | 0.010 | 4.60E-01 |
| T2DM | rs945187    | G | 0.42 | 0.031  | 0.004 | 1.88E-15  | 0.007  | 0.008 | 3.80E-01 |
| T2DM | rs10750397  | G | 0.71 | -0.040 | 0.004 | 1.67E-21  | -0.001 | 0.009 | 8.50E-01 |
| T2DM | rs10750840  | T | 0.55 | -0.024 | 0.004 | 8.89E-10  | -0.006 | 0.008 | 4.90E-01 |
| T2DM | rs10766076  | T | 0.71 | 0.026  | 0.004 | 1.48E-09  | -0.001 | 0.009 | 8.30E-01 |
| T2DM | rs10767659  | G | 0.35 | 0.026  | 0.004 | 6.00E-10  | 0.019  | 0.008 | 2.80E-02 |
| T2DM | rs10830963  | G | 0.31 | 0.073  | 0.004 | 7.59E-68  | -0.002 | 0.009 | 6.00E-01 |
| T2DM | rs10835690  | T | 0.82 | -0.029 | 0.005 | 2.45E-08  | -0.032 | 0.010 | 1.80E-03 |
| T2DM | rs11236524  | C | 0.24 | 0.036  | 0.006 | 1.41E-08  | -0.031 | 0.014 | 2.20E-02 |
| T2DM | rs11602873  | T | 0.15 | -0.099 | 0.006 | 8.08E-63  | -0.004 | 0.011 | 6.70E-01 |
| T2DM | rs117316450 | G | 0.02 | 0.133  | 0.017 | 8.10E-15  | 0.030  | 0.027 | 2.40E-01 |
| T2DM | rs12419690  | G | 0.51 | 0.030  | 0.004 | 9.33E-14  | 0.002  | 0.008 | 8.10E-01 |
| T2DM | rs12789028  | G | 0.82 | -0.046 | 0.005 | 4.31E-20  | -0.007 | 0.010 | 4.90E-01 |
| T2DM | rs149027146 | T | 0.06 | 0.074  | 0.010 | 1.28E-12  | 0.028  | 0.016 | 8.40E-02 |
| T2DM | rs1662185   | G | 0.58 | -0.023 | 0.004 | 3.54E-08  | -0.012 | 0.009 | 1.40E-01 |
| T2DM | rs16907058  | G | 0.94 | -0.046 | 0.008 | 4.06E-08  | 0.008  | 0.018 | 7.40E-01 |
| T2DM | rs174541    | C | 0.35 | -0.028 | 0.004 | 1.42E-11  | -0.001 | 0.008 | 9.10E-01 |
| T2DM | rs2237897   | C | 0.76 | 0.220  | 0.007 | 2.03E-229 | 0.023  | 0.019 | 2.90E-01 |
| T2DM | rs2513505   | C | 0.41 | -0.024 | 0.004 | 2.69E-10  | -0.016 | 0.008 | 4.10E-02 |
| T2DM | rs2956092   | C | 0.65 | -0.025 | 0.004 | 2.15E-10  | -0.004 | 0.008 | 5.60E-01 |
| T2DM | rs35251247  | G | 0.71 | -0.031 | 0.004 | 1.88E-13  | -0.016 | 0.009 | 4.90E-02 |
| T2DM | rs3918298   | G | 0.88 | 0.104  | 0.010 | 8.93E-25  | -0.008 | 0.024 | 6.80E-01 |
| T2DM | rs4929965   | G | 0.61 | -0.068 | 0.004 | 2.76E-58  | -0.021 | 0.008 | 1.70E-02 |
| T2DM | rs529623    | C | 0.50 | -0.022 | 0.004 | 3.75E-09  | -0.010 | 0.008 | 1.70E-01 |
| T2DM | rs62618693  | C | 0.96 | 0.082  | 0.011 | 1.60E-13  | 0.034  | 0.019 | 1.00E-01 |

|      |             |   |      |        |       |          |        |       |          |
|------|-------------|---|------|--------|-------|----------|--------|-------|----------|
| T2DM | rs7127212   | C | 0.61 | -0.023 | 0.004 | 3.08E-08 | -0.010 | 0.008 | 1.20E-01 |
| T2DM | rs7130522   | C | 0.33 | 0.022  | 0.004 | 6.14E-08 | -0.006 | 0.009 | 4.40E-01 |
| T2DM | rs7483027   | C | 0.33 | -0.027 | 0.004 | 7.41E-11 | -0.001 | 0.008 | 7.20E-01 |
| T2DM | rs757110    | C | 0.37 | 0.060  | 0.004 | 3.08E-53 | -0.003 | 0.008 | 7.80E-01 |
| T2DM | rs76789970  | C | 0.89 | -0.039 | 0.006 | 1.12E-10 | -0.019 | 0.012 | 1.00E-01 |
| T2DM | rs7941510   | C | 0.65 | 0.035  | 0.004 | 4.29E-17 | 0.031  | 0.009 | 2.20E-04 |
| T2DM | rs10773000  | G | 0.67 | 0.034  | 0.004 | 1.11E-16 | -0.004 | 0.008 | 5.90E-01 |
| T2DM | rs10844519  | G | 0.41 | 0.030  | 0.004 | 9.14E-13 | -0.003 | 0.009 | 9.20E-01 |
| T2DM | rs10879261  | G | 0.39 | 0.034  | 0.004 | 2.87E-19 | 0.012  | 0.008 | 1.70E-01 |
| T2DM | rs11048457  | G | 0.39 | 0.039  | 0.004 | 3.44E-19 | 0.012  | 0.009 | 1.40E-01 |
| T2DM | rs11108094  | C | 0.93 | -0.057 | 0.009 | 8.66E-11 | -0.017 | 0.015 | 3.00E-01 |
| T2DM | rs11114650  | G | 0.78 | -0.045 | 0.008 | 2.52E-09 | 0.018  | 0.036 | 6.50E-01 |
| T2DM | rs11173646  | T | 0.74 | -0.029 | 0.005 | 1.33E-09 | -0.021 | 0.010 | 1.50E-02 |
| T2DM | rs11614914  | C | 0.70 | -0.039 | 0.004 | 3.41E-19 | -0.002 | 0.008 | 8.60E-01 |
| T2DM | rs11830241  | C | 0.90 | -0.041 | 0.007 | 1.14E-08 | -0.005 | 0.015 | 7.70E-01 |
| T2DM | rs12422600  | G | 0.64 | 0.024  | 0.004 | 1.97E-09 | 0.007  | 0.008 | 3.40E-01 |
| T2DM | rs12825669  | G | 0.67 | 0.023  | 0.004 | 3.54E-08 | 0.014  | 0.008 | 7.80E-02 |
| T2DM | rs1426371   | G | 0.69 | 0.043  | 0.005 | 1.52E-21 | 0.008  | 0.009 | 3.90E-01 |
| T2DM | rs2066827   | G | 0.29 | 0.032  | 0.005 | 3.09E-10 | 0.013  | 0.009 | 1.40E-01 |
| T2DM | rs2257883   | G | 0.74 | -0.071 | 0.005 | 1.41E-47 | -0.011 | 0.011 | 3.10E-01 |
| T2DM | rs2277339   | G | 0.14 | 0.044  | 0.006 | 6.02E-15 | 0.020  | 0.013 | 1.30E-01 |
| T2DM | rs2408252   | C | 0.54 | -0.026 | 0.004 | 8.28E-10 | 0.008  | 0.008 | 2.40E-01 |
| T2DM | rs2730827   | C | 0.51 | -0.028 | 0.004 | 2.10E-13 | -0.007 | 0.008 | 4.30E-01 |
| T2DM | rs2732469   | T | 0.58 | 0.032  | 0.004 | 5.32E-14 | -0.009 | 0.008 | 3.50E-01 |
| T2DM | rs3751239   | G | 0.22 | -0.069 | 0.005 | 2.19E-48 | -0.005 | 0.010 | 5.20E-01 |
| T2DM | rs4930726   | C | 0.33 | -0.035 | 0.004 | 7.32E-18 | -0.025 | 0.008 | 2.50E-03 |
| T2DM | rs56348580  | G | 0.71 | 0.051  | 0.005 | 3.96E-27 | -0.008 | 0.008 | 4.20E-01 |
| T2DM | rs6538805   | C | 0.47 | -0.030 | 0.004 | 7.90E-15 | 0.004  | 0.008 | 6.00E-01 |
| T2DM | rs7132908   | G | 0.64 | -0.030 | 0.004 | 1.13E-13 | 0.001  | 0.008 | 9.40E-01 |
| T2DM | rs7134150   | G | 0.90 | -0.044 | 0.007 | 2.47E-10 | 0.011  | 0.016 | 3.80E-01 |
| T2DM | rs7316626   | G | 0.80 | -0.032 | 0.005 | 2.48E-09 | -0.006 | 0.010 | 5.90E-01 |
| T2DM | rs76895963  | G | 0.02 | -0.422 | 0.020 | 4.73E-97 | -0.112 | 0.030 | 1.70E-04 |
| T2DM | rs79310463  | C | 0.83 | -0.050 | 0.005 | 3.95E-21 | -0.024 | 0.011 | 3.70E-02 |
| T2DM | rs884847    | G | 0.80 | -0.029 | 0.005 | 4.63E-09 | -0.006 | 0.010 | 5.70E-01 |
| T2DM | rs11616380  | G | 0.73 | 0.076  | 0.004 | 1.26E-70 | -0.011 | 0.009 | 1.70E-01 |
| T2DM | rs314879    | C | 0.23 | 0.036  | 0.005 | 2.51E-15 | 0.004  | 0.009 | 7.00E-01 |
| T2DM | rs34584161  | G | 0.28 | -0.057 | 0.004 | 9.67E-38 | -0.003 | 0.009 | 6.80E-01 |
| T2DM | rs4397977   | G | 0.58 | -0.028 | 0.004 | 1.60E-11 | 0.000  | 0.008 | 9.70E-01 |
| T2DM | rs57286125  | G | 0.83 | -0.061 | 0.005 | 7.22E-33 | 0.008  | 0.010 | 3.20E-01 |
| T2DM | rs61967710  | G | 0.94 | -0.055 | 0.010 | 2.19E-08 | -0.015 | 0.024 | 4.80E-01 |
| T2DM | rs6561273   | G | 0.40 | -0.030 | 0.005 | 5.65E-09 | 0.007  | 0.008 | 4.00E-01 |
| T2DM | rs7991679   | T | 0.76 | 0.027  | 0.005 | 1.14E-08 | 0.016  | 0.011 | 8.60E-02 |
| T2DM | rs9316500   | G | 0.35 | -0.040 | 0.004 | 1.37E-22 | 0.004  | 0.009 | 5.50E-01 |
| T2DM | rs9515905   | G | 0.26 | -0.047 | 0.004 | 7.58E-27 | 0.009  | 0.009 | 4.60E-01 |
| T2DM | rs9560114   | T | 0.24 | -0.026 | 0.005 | 3.58E-08 | -0.018 | 0.009 | 5.30E-02 |
| T2DM | rs9564268   | C | 0.54 | -0.024 | 0.004 | 1.24E-09 | 0.013  | 0.008 | 1.10E-01 |
| T2DM | rs9587811   | C | 0.55 | 0.025  | 0.004 | 6.74E-11 | -0.005 | 0.008 | 4.20E-01 |
| T2DM | rs112324411 | C | 0.94 | 0.073  | 0.010 | 1.47E-12 | -0.010 | 0.016 | 4.90E-01 |
| T2DM | rs11848361  | G | 0.92 | 0.048  | 0.009 | 1.87E-08 | 0.004  | 0.013 | 8.00E-01 |
| T2DM | rs12433335  | C | 0.57 | -0.021 | 0.004 | 2.08E-08 | -0.018 | 0.008 | 2.10E-02 |
| T2DM | rs12586772  | T | 0.40 | -0.023 | 0.004 | 5.03E-09 | 0.002  | 0.008 | 9.50E-01 |
| T2DM | rs12883788  | C | 0.59 | -0.033 | 0.004 | 2.96E-16 | 0.001  | 0.008 | 8.50E-01 |
| T2DM | rs12892257  | G | 0.49 | 0.029  | 0.005 | 8.41E-09 | 0.003  | 0.008 | 7.50E-01 |
| T2DM | rs2056857   | C | 0.59 | 0.026  | 0.004 | 5.23E-11 | -0.003 | 0.008 | 6.20E-01 |
| T2DM | rs242105    | C | 0.41 | 0.039  | 0.006 | 3.84E-11 | 0.015  | 0.009 | 8.30E-02 |
| T2DM | rs4902002   | G | 0.35 | 0.025  | 0.004 | 1.97E-09 | -0.003 | 0.009 | 7.30E-01 |



|      |             |   |      |        |       |           |        |       |          |
|------|-------------|---|------|--------|-------|-----------|--------|-------|----------|
| T2DM | rs4906272   | C | 0.73 | -0.030 | 0.005 | 8.03E-11  | -0.001 | 0.011 | 8.70E-01 |
| T2DM | rs56365443  | G | 0.32 | -0.024 | 0.004 | 1.46E-08  | -0.015 | 0.008 | 4.40E-02 |
| T2DM | rs712315    | T | 0.78 | 0.028  | 0.005 | 3.21E-08  | 0.013  | 0.011 | 2.20E-01 |
| T2DM | rs7147483   | C | 0.34 | -0.035 | 0.004 | 9.05E-18  | 0.003  | 0.009 | 5.90E-01 |
| T2DM | rs7156625   | G | 0.77 | -0.053 | 0.005 | 2.88E-27  | 0.001  | 0.009 | 9.60E-01 |
| T2DM | rs723355    | G | 0.56 | 0.024  | 0.004 | 1.23E-09  | 0.014  | 0.008 | 9.10E-02 |
| T2DM | rs8010382   | G | 0.47 | 0.027  | 0.004 | 2.56E-12  | 0.001  | 0.008 | 9.30E-01 |
| T2DM | rs11858759  | G | 0.73 | 0.024  | 0.004 | 4.06E-08  | 0.020  | 0.008 | 1.60E-02 |
| T2DM | rs12910361  | G | 0.61 | 0.069  | 0.004 | 6.29E-66  | 0.021  | 0.009 | 1.50E-02 |
| T2DM | rs148106383 | C | 0.97 | -0.093 | 0.016 | 2.70E-09  | 0.030  | 0.024 | 3.00E-01 |
| T2DM | rs149336329 | G | 0.96 | 0.087  | 0.010 | 3.62E-18  | 0.015  | 0.019 | 3.90E-01 |
| T2DM | rs1812707   | C | 0.44 | -0.023 | 0.004 | 5.87E-09  | 0.005  | 0.008 | 5.70E-01 |
| T2DM | rs2289739   | G | 0.69 | -0.036 | 0.006 | 3.64E-11  | -0.013 | 0.008 | 7.70E-02 |
| T2DM | rs2290203   | G | 0.70 | -0.051 | 0.004 | 5.74E-32  | -0.006 | 0.010 | 5.90E-01 |
| T2DM | rs2447198   | C | 0.22 | -0.034 | 0.006 | 6.34E-10  | 0.003  | 0.013 | 7.10E-01 |
| T2DM | rs4776970   | T | 0.45 | -0.029 | 0.004 | 7.23E-13  | -0.014 | 0.008 | 7.20E-02 |
| T2DM | rs4777857   | G | 0.44 | 0.026  | 0.004 | 6.22E-11  | -0.012 | 0.008 | 1.70E-01 |
| T2DM | rs4923864   | G | 0.69 | 0.057  | 0.006 | 1.26E-20  | -0.002 | 0.015 | 9.30E-01 |
| T2DM | rs59646751  | G | 0.69 | -0.024 | 0.004 | 4.15E-09  | 0.001  | 0.008 | 8.30E-01 |
| T2DM | rs6495182   | C | 0.68 | 0.041  | 0.004 | 5.27E-22  | 0.009  | 0.009 | 2.70E-01 |
| T2DM | rs7163757   | C | 0.56 | 0.043  | 0.004 | 1.10E-29  | -0.008 | 0.008 | 2.70E-01 |
| T2DM | rs7169799   | C | 0.45 | 0.021  | 0.004 | 2.08E-08  | 0.005  | 0.008 | 6.00E-01 |
| T2DM | rs7178762   | C | 0.49 | 0.032  | 0.004 | 3.33E-15  | 0.005  | 0.008 | 4.70E-01 |
| T2DM | rs8043085   | G | 0.70 | -0.041 | 0.004 | 3.31E-22  | -0.002 | 0.009 | 8.40E-01 |
| T2DM | rs893617    | C | 0.28 | 0.054  | 0.004 | 3.40E-39  | 0.005  | 0.009 | 6.80E-01 |
| T2DM | rs9479      | G | 0.52 | 0.027  | 0.004 | 2.40E-13  | 0.004  | 0.008 | 6.10E-01 |
| T2DM | rs1075855   | G | 0.28 | 0.026  | 0.005 | 5.08E-09  | -0.012 | 0.009 | 1.80E-01 |
| T2DM | rs111283203 | G | 0.76 | -0.026 | 0.005 | 4.55E-08  | -0.006 | 0.010 | 5.90E-01 |
| T2DM | rs11646052  | G | 0.41 | 0.026  | 0.004 | 2.62E-11  | 0.003  | 0.008 | 5.60E-01 |
| T2DM | rs12918782  | G | 0.26 | 0.031  | 0.005 | 5.63E-11  | 0.024  | 0.010 | 2.20E-02 |
| T2DM | rs1421085   | C | 0.37 | 0.118  | 0.004 | 6.57E-192 | 0.024  | 0.008 | 2.60E-03 |
| T2DM | rs2216063   | G | 0.20 | -0.030 | 0.005 | 4.22E-08  | 0.001  | 0.013 | 9.70E-01 |
| T2DM | rs244415    | G | 0.63 | 0.040  | 0.004 | 1.37E-22  | 0.014  | 0.008 | 7.30E-02 |
| T2DM | rs4384608   | C | 0.41 | 0.027  | 0.004 | 6.17E-10  | 0.005  | 0.008 | 5.50E-01 |
| T2DM | rs4788815   | T | 0.65 | 0.023  | 0.004 | 7.70E-09  | 0.013  | 0.008 | 1.50E-01 |
| T2DM | rs55857387  | C | 0.25 | -0.044 | 0.005 | 9.07E-22  | -0.009 | 0.010 | 4.10E-01 |
| T2DM | rs56823429  | C | 0.27 | 0.042  | 0.005 | 1.56E-20  | 0.019  | 0.009 | 2.40E-02 |
| T2DM | rs72802365  | G | 0.93 | 0.107  | 0.008 | 4.32E-41  | 0.030  | 0.014 | 4.10E-02 |
| T2DM | rs8054556   | G | 0.57 | -0.032 | 0.004 | 4.36E-16  | 0.001  | 0.008 | 9.70E-01 |
| T2DM | rs8056890   | G | 0.68 | -0.030 | 0.004 | 2.16E-12  | -0.019 | 0.008 | 2.30E-02 |
| T2DM | rs8061528   | C | 0.76 | -0.035 | 0.005 | 1.48E-14  | -0.012 | 0.010 | 2.10E-01 |
| T2DM | rs9927842   | C | 0.79 | -0.031 | 0.005 | 8.25E-10  | -0.021 | 0.011 | 5.50E-02 |
| T2DM | rs9937296   | C | 0.77 | 0.045  | 0.007 | 2.06E-10  | -0.021 | 0.011 | 1.40E-01 |
| T2DM | rs11078916  | C | 0.65 | -0.033 | 0.004 | 8.37E-15  | -0.027 | 0.009 | 2.40E-03 |
| T2DM | rs1109442   | C | 0.46 | 0.022  | 0.004 | 3.82E-09  | 0.002  | 0.008 | 9.80E-01 |
| T2DM | rs11150745  | G | 0.32 | -0.031 | 0.005 | 3.94E-09  | -0.004 | 0.008 | 6.30E-01 |
| T2DM | rs11651755  | C | 0.47 | 0.066  | 0.004 | 3.60E-68  | 0.004  | 0.008 | 8.00E-01 |
| T2DM | rs117642733 | C | 0.96 | -0.076 | 0.013 | 1.01E-08  | -0.013 | 0.019 | 3.70E-01 |
| T2DM | rs11870735  | C | 0.82 | -0.031 | 0.005 | 6.07E-09  | 0.002  | 0.010 | 8.60E-01 |
| T2DM | rs12603589  | C | 0.31 | 0.042  | 0.005 | 5.58E-20  | 0.013  | 0.010 | 2.50E-01 |
| T2DM | rs17810376  | G | 0.30 | 0.028  | 0.005 | 2.92E-09  | -0.026 | 0.008 | 1.40E-03 |
| T2DM | rs2040792   | C | 0.46 | 0.031  | 0.004 | 1.88E-15  | -0.003 | 0.008 | 5.80E-01 |
| T2DM | rs2297508   | G | 0.56 | -0.031 | 0.004 | 2.44E-14  | -0.027 | 0.008 | 7.30E-04 |
| T2DM | rs35895680  | C | 0.71 | 0.050  | 0.005 | 2.48E-26  | 0.001  | 0.008 | 8.60E-01 |
| T2DM | rs366577    | C | 0.49 | 0.022  | 0.004 | 2.86E-08  | 0.004  | 0.008 | 4.90E-01 |
| T2DM | rs372558    | G | 0.42 | -0.021 | 0.004 | 4.72E-08  | -0.003 | 0.008 | 8.00E-01 |

|            |             |   |      |        |       |          |        |       |          |
|------------|-------------|---|------|--------|-------|----------|--------|-------|----------|
| T2DM       | rs3744347   | G | 0.25 | -0.030 | 0.005 | 6.01E-11 | -0.010 | 0.010 | 3.00E-01 |
| T2DM       | rs4335      | G | 0.48 | 0.030  | 0.004 | 1.24E-15 | -0.005 | 0.008 | 6.90E-01 |
| T2DM       | rs57767539  | G | 0.94 | -0.062 | 0.009 | 8.19E-12 | -0.019 | 0.015 | 2.40E-01 |
| T2DM       | rs61736066  | G | 0.88 | 0.042  | 0.006 | 4.76E-11 | -0.018 | 0.014 | 2.80E-01 |
| T2DM       | rs676387    | C | 0.68 | -0.042 | 0.004 | 3.44E-24 | -0.007 | 0.009 | 4.00E-01 |
| T2DM       | rs7224711   | C | 0.52 | 0.031  | 0.004 | 6.53E-16 | 0.001  | 0.008 | 7.70E-01 |
| T2DM       | rs8071043   | C | 0.33 | 0.047  | 0.004 | 8.18E-30 | -0.005 | 0.008 | 6.00E-01 |
| T2DM       | rs858519    | C | 0.50 | -0.024 | 0.004 | 1.97E-09 | -0.017 | 0.008 | 2.70E-02 |
| T2DM       | rs9913225   | G | 0.37 | 0.026  | 0.004 | 5.75E-11 | -0.006 | 0.008 | 4.70E-01 |
| T2DM       | rs10048404  | C | 0.66 | 0.031  | 0.005 | 6.78E-09 | -0.009 | 0.008 | 3.60E-01 |
| T2DM       | rs12454712  | C | 0.41 | -0.042 | 0.004 | 1.57E-27 | -0.016 | 0.008 | 5.70E-02 |
| T2DM       | rs17747955  | C | 0.45 | 0.022  | 0.004 | 2.14E-08 | 0.005  | 0.008 | 5.20E-01 |
| T2DM       | rs2032217   | G | 0.67 | -0.027 | 0.004 | 2.08E-11 | -0.015 | 0.009 | 1.10E-01 |
| T2DM       | rs303760    | C | 0.69 | -0.033 | 0.004 | 3.18E-14 | -0.005 | 0.008 | 3.70E-01 |
| T2DM       | rs410150    | C | 0.21 | 0.029  | 0.005 | 1.74E-09 | 0.012  | 0.010 | 2.00E-01 |
| T2DM       | rs6565922   | C | 0.58 | -0.028 | 0.004 | 8.44E-13 | 0.024  | 0.008 | 2.90E-03 |
| T2DM       | rs6567160   | C | 0.24 | 0.054  | 0.004 | 1.68E-34 | -0.004 | 0.009 | 8.60E-01 |
| T2DM       | rs7227272   | G | 0.82 | 0.041  | 0.006 | 3.20E-13 | -0.016 | 0.013 | 1.90E-01 |
| T2DM       | rs7240767   | C | 0.48 | 0.034  | 0.005 | 2.62E-11 | 0.006  | 0.008 | 5.30E-01 |
| T2DM       | rs9319943   | C | 0.21 | -0.031 | 0.005 | 1.39E-10 | -0.009 | 0.010 | 5.30E-01 |
| T2DM       | rs9958640   | G | 0.60 | -0.024 | 0.004 | 1.92E-08 | 0.004  | 0.009 | 5.30E-01 |
| T2DM       | rs10404726  | C | 0.48 | 0.026  | 0.004 | 1.27E-09 | 0.006  | 0.008 | 4.90E-01 |
| T2DM       | rs10408163  | C | 0.60 | 0.032  | 0.004 | 1.18E-13 | -0.003 | 0.009 | 7.00E-01 |
| T2DM       | rs12185519  | C | 0.81 | -0.036 | 0.005 | 2.62E-11 | -0.025 | 0.010 | 1.20E-02 |
| T2DM       | rs142385484 | C | 0.85 | 0.034  | 0.006 | 2.14E-08 | 0.022  | 0.011 | 3.60E-02 |
| T2DM       | rs2115107   | G | 0.59 | -0.036 | 0.004 | 5.49E-20 | -0.017 | 0.008 | 3.20E-02 |
| T2DM       | rs2867570   | G | 0.57 | 0.026  | 0.004 | 2.62E-11 | 0.010  | 0.008 | 2.00E-01 |
| T2DM       | rs429358    | C | 0.15 | -0.059 | 0.006 | 2.02E-26 | -0.121 | 0.011 | 1.50E-29 |
| T2DM       | rs4805881   | C | 0.62 | -0.038 | 0.004 | 2.53E-22 | -0.010 | 0.008 | 2.20E-01 |
| T2DM       | rs4807125   | C | 0.85 | -0.033 | 0.006 | 3.29E-08 | -0.016 | 0.011 | 1.40E-01 |
| T2DM       | rs58542926  | C | 0.93 | -0.072 | 0.007 | 1.32E-23 | -0.289 | 0.015 | 2.80E-85 |
| T2DM       | rs7246440   | G | 0.62 | 0.030  | 0.004 | 3.56E-12 | 0.000  | 0.009 | 9.10E-01 |
| T2DM       | rs75253922  | C | 0.18 | 0.040  | 0.005 | 9.74E-14 | 0.017  | 0.010 | 3.90E-02 |
| T2DM       | rs8107527   | G | 0.62 | -0.054 | 0.004 | 7.92E-42 | -0.009 | 0.009 | 3.60E-01 |
| T2DM       | rs9384      | G | 0.66 | 0.040  | 0.004 | 6.61E-23 | -0.001 | 0.008 | 8.00E-01 |
| T2DM       | rs12625671  | C | 0.23 | 0.060  | 0.006 | 5.72E-28 | 0.008  | 0.013 | 5.10E-01 |
| T2DM       | rs17265513  | C | 0.19 | 0.033  | 0.006 | 2.76E-09 | 0.008  | 0.010 | 2.80E-01 |
| T2DM       | rs2252115   | G | 0.43 | -0.024 | 0.004 | 1.23E-09 | -0.003 | 0.008 | 5.80E-01 |
| T2DM       | rs4809906   | G | 0.62 | 0.035  | 0.004 | 6.41E-18 | 0.017  | 0.008 | 2.70E-02 |
| T2DM       | rs4810145   | C | 0.52 | 0.030  | 0.004 | 1.54E-15 | 0.000  | 0.008 | 9.40E-01 |
| T2DM       | rs6011155   | C | 0.41 | -0.028 | 0.004 | 3.29E-13 | -0.017 | 0.008 | 2.00E-02 |
| T2DM       | rs6021276   | C | 0.63 | -0.028 | 0.004 | 1.49E-12 | 0.003  | 0.008 | 8.10E-01 |
| T2DM       | rs6059662   | G | 0.70 | 0.037  | 0.004 | 9.37E-18 | 0.017  | 0.008 | 2.60E-02 |
| T2DM       | rs6066138   | G | 0.74 | 0.042  | 0.005 | 4.03E-19 | -0.001 | 0.009 | 8.00E-01 |
| T2DM       | rs6073143   | C | 0.73 | 0.030  | 0.004 | 4.88E-12 | 0.015  | 0.009 | 1.30E-01 |
| T2DM       | rs6137042   | G | 0.70 | 0.026  | 0.005 | 2.20E-08 | 0.004  | 0.010 | 5.90E-01 |
| T2DM       | rs7274134   | C | 0.67 | 0.025  | 0.004 | 1.70E-09 | 0.011  | 0.009 | 3.30E-01 |
| T2DM       | rs11913442  | C | 0.38 | -0.025 | 0.004 | 9.07E-10 | -0.003 | 0.008 | 7.70E-01 |
| T2DM       | rs138771    | G | 0.69 | -0.026 | 0.004 | 3.95E-09 | -0.002 | 0.010 | 8.10E-01 |
| T2DM       | rs1801645   | C | 0.28 | 0.037  | 0.005 | 9.48E-17 | -0.004 | 0.009 | 8.50E-01 |
| T2DM       | rs2240716   | C | 0.71 | -0.026 | 0.004 | 4.43E-10 | 0.009  | 0.008 | 2.10E-01 |
| T2DM       | rs3747207   | G | 0.72 | -0.041 | 0.004 | 7.70E-21 | -0.192 | 0.009 | 2.60E-92 |
| T2DM       | rs56392746  | G | 0.92 | 0.058  | 0.008 | 2.57E-14 | 0.009  | 0.013 | 4.60E-01 |
| T2DM       | rs5762925   | C | 0.38 | 0.027  | 0.004 | 7.59E-12 | 0.003  | 0.008 | 8.20E-01 |
| T2DM       | rs75307421  | G | 0.97 | -0.074 | 0.013 | 2.36E-08 | -0.003 | 0.031 | 9.70E-01 |
| Television | rs10737620  | T | 0.27 | 0.014  | 0.002 | 2.55E-09 | 0.004  | 0.009 | 5.10E-01 |

|            |             |   |      |        |       |          |        |       |          |
|------------|-------------|---|------|--------|-------|----------|--------|-------|----------|
| Television | rs11810109  | A | 0.70 | 0.016  | 0.002 | 5.38E-12 | 0.002  | 0.008 | 7.80E-01 |
| Television | rs148648822 | G | 0.84 | -0.018 | 0.003 | 4.22E-09 | 0.000  | 0.011 | 9.80E-01 |
| Television | rs17379561  | A | 0.86 | -0.025 | 0.003 | 1.08E-16 | -0.019 | 0.011 | 5.70E-02 |
| Television | rs4845364   | A | 0.50 | -0.015 | 0.002 | 1.28E-12 | 0.003  | 0.008 | 6.00E-01 |
| Television | rs631130    | T | 0.37 | -0.014 | 0.002 | 5.04E-09 | -0.007 | 0.008 | 4.90E-01 |
| Television | rs6673341   | T | 0.47 | -0.015 | 0.002 | 2.23E-11 | -0.003 | 0.008 | 5.80E-01 |
| Television | rs72725224  | A | 0.98 | -0.046 | 0.008 | 3.74E-09 | -0.022 | 0.028 | 4.70E-01 |
| Television | rs984409    | G | 0.36 | -0.015 | 0.002 | 4.13E-11 | -0.013 | 0.008 | 1.00E-01 |
| Television | rs10189857  | A | 0.57 | -0.020 | 0.002 | 6.19E-21 | 0.007  | 0.008 | 2.90E-01 |
| Television | rs10932837  | C | 0.49 | -0.013 | 0.002 | 1.34E-09 | -0.008 | 0.008 | 2.80E-01 |
| Television | rs11689199  | A | 0.60 | 0.018  | 0.002 | 5.47E-17 | 0.005  | 0.008 | 4.70E-01 |
| Television | rs12105701  | C | 0.40 | -0.013 | 0.002 | 5.43E-09 | -0.004 | 0.008 | 6.20E-01 |
| Television | rs1451533   | G | 0.72 | -0.016 | 0.002 | 1.09E-10 | 0.005  | 0.009 | 3.80E-01 |
| Television | rs2971640   | G | 0.51 | -0.013 | 0.002 | 4.20E-09 | 0.003  | 0.008 | 7.80E-01 |
| Television | rs374722    | G | 0.15 | 0.024  | 0.003 | 5.49E-16 | -0.003 | 0.011 | 5.30E-01 |
| Television | rs3754970   | T | 0.50 | -0.015 | 0.002 | 4.80E-12 | -0.001 | 0.008 | 7.10E-01 |
| Television | rs4577309   | A | 0.47 | 0.016  | 0.002 | 1.56E-13 | -0.006 | 0.008 | 5.00E-01 |
| Television | rs4973576   | C | 0.30 | -0.015 | 0.002 | 1.04E-09 | 0.007  | 0.009 | 3.90E-01 |
| Television | rs62641636  | A | 0.69 | 0.014  | 0.002 | 6.99E-10 | 0.009  | 0.008 | 3.10E-01 |
| Television | rs6721975   | T | 0.23 | -0.017 | 0.003 | 1.71E-10 | -0.015 | 0.009 | 8.90E-02 |
| Television | rs72781699  | G | 0.80 | -0.019 | 0.003 | 3.05E-12 | -0.015 | 0.010 | 1.60E-01 |
| Television | rs7564130   | T | 0.64 | -0.015 | 0.002 | 2.77E-11 | 0.004  | 0.008 | 6.80E-01 |
| Television | rs11130793  | C | 0.60 | 0.013  | 0.002 | 5.04E-09 | -0.006 | 0.008 | 6.00E-01 |
| Television | rs114600294 | G | 0.79 | -0.016 | 0.003 | 7.88E-10 | -0.014 | 0.009 | 1.30E-01 |
| Television | rs11714337  | G | 0.57 | 0.014  | 0.002 | 4.72E-11 | 0.010  | 0.008 | 2.30E-01 |
| Television | rs12491503  | G | 0.67 | -0.014 | 0.002 | 5.55E-10 | -0.009 | 0.008 | 2.90E-01 |
| Television | rs2034768   | A | 0.49 | 0.015  | 0.002 | 8.62E-12 | 0.012  | 0.008 | 9.20E-02 |
| Television | rs3796386   | G | 0.57 | -0.026 | 0.002 | 3.23E-33 | -0.013 | 0.008 | 8.40E-02 |
| Television | rs56398417  | C | 0.69 | 0.014  | 0.002 | 5.87E-10 | 0.007  | 0.008 | 3.30E-01 |
| Television | rs6797840   | A | 0.46 | -0.016 | 0.002 | 1.67E-13 | -0.008 | 0.008 | 3.10E-01 |
| Television | rs9834970   | T | 0.50 | 0.013  | 0.002 | 3.27E-09 | 0.005  | 0.008 | 5.60E-01 |
| Television | rs9867121   | C | 0.82 | 0.019  | 0.003 | 3.88E-12 | 0.007  | 0.010 | 4.50E-01 |
| Television | rs13107325  | C | 0.93 | -0.029 | 0.004 | 1.49E-12 | -0.011 | 0.015 | 4.00E-01 |
| Television | rs34811474  | G | 0.77 | 0.015  | 0.003 | 2.28E-09 | 0.011  | 0.009 | 2.70E-01 |
| Television | rs66852340  | C | 0.78 | -0.018 | 0.003 | 7.91E-12 | 0.005  | 0.009 | 6.90E-01 |
| Television | rs6825241   | C | 0.54 | -0.017 | 0.002 | 4.92E-15 | -0.008 | 0.008 | 2.00E-01 |
| Television | rs6850494   | A | 0.62 | -0.014 | 0.002 | 1.13E-10 | -0.012 | 0.008 | 7.90E-02 |
| Television | rs7693082   | G | 0.30 | 0.015  | 0.002 | 1.65E-10 | 0.013  | 0.009 | 1.20E-01 |
| Television | rs7693703   | G | 0.91 | 0.023  | 0.004 | 2.73E-09 | -0.005 | 0.014 | 8.10E-01 |
| Television | rs10041724  | T | 0.81 | 0.018  | 0.003 | 3.92E-11 | 0.007  | 0.010 | 4.80E-01 |
| Television | rs10054327  | G | 0.58 | 0.017  | 0.002 | 3.45E-15 | 0.024  | 0.008 | 4.10E-03 |
| Television | rs1031423   | T | 0.22 | -0.019 | 0.003 | 1.76E-12 | 0.001  | 0.009 | 7.90E-01 |
| Television | rs262890    | A | 0.70 | -0.019 | 0.002 | 3.21E-15 | -0.002 | 0.008 | 7.20E-01 |
| Television | rs42210     | G | 0.29 | -0.014 | 0.002 | 7.35E-09 | 0.006  | 0.009 | 4.50E-01 |
| Television | rs57585211  | T | 0.83 | -0.017 | 0.003 | 4.33E-09 | -0.005 | 0.010 | 5.60E-01 |
| Television | rs62379379  | G | 0.93 | -0.026 | 0.004 | 7.79E-10 | -0.016 | 0.015 | 3.10E-01 |
| Television | rs72828890  | C | 0.87 | 0.019  | 0.003 | 4.95E-09 | 0.020  | 0.012 | 7.00E-02 |
| Television | rs7716447   | A | 0.64 | -0.013 | 0.002 | 3.64E-09 | -0.007 | 0.008 | 4.90E-01 |
| Television | rs10947452  | T | 0.35 | 0.014  | 0.002 | 6.36E-10 | 0.005  | 0.008 | 5.90E-01 |
| Television | rs17789218  | T | 0.76 | 0.019  | 0.003 | 1.39E-13 | -0.012 | 0.009 | 2.00E-01 |
| Television | rs2184364   | A | 0.78 | 0.016  | 0.003 | 3.00E-09 | 0.021  | 0.009 | 8.40E-03 |
| Television | rs3135044   | C | 0.64 | -0.015 | 0.002 | 8.68E-11 | -0.017 | 0.008 | 3.60E-02 |
| Television | rs6905544   | A | 0.40 | -0.019 | 0.002 | 8.46E-18 | -0.021 | 0.008 | 5.00E-03 |
| Television | rs72834698  | G | 0.86 | 0.023  | 0.003 | 2.74E-13 | 0.011  | 0.011 | 3.20E-01 |
| Television | rs77589760  | C | 0.96 | 0.037  | 0.006 | 4.08E-10 | -0.002 | 0.021 | 9.50E-01 |
| Television | rs78394231  | T | 0.90 | -0.021 | 0.004 | 9.67E-09 | 0.015  | 0.013 | 2.40E-01 |

|            |             |   |      |        |       |          |        |       |          |
|------------|-------------|---|------|--------|-------|----------|--------|-------|----------|
| Television | rs9471333   | C | 0.45 | 0.013  | 0.002 | 1.54E-09 | 0.012  | 0.008 | 8.40E-02 |
| Television | rs9718104   | T | 0.94 | -0.041 | 0.005 | 9.31E-19 | -0.027 | 0.016 | 1.30E-01 |
| Television | rs17568389  | T | 0.49 | 0.015  | 0.002 | 8.57E-13 | 0.006  | 0.008 | 5.60E-01 |
| Television | rs62471080  | G | 0.54 | -0.013 | 0.002 | 3.66E-09 | -0.004 | 0.008 | 4.90E-01 |
| Television | rs7788008   | G | 0.57 | 0.013  | 0.002 | 5.88E-09 | 0.005  | 0.008 | 4.70E-01 |
| Television | rs6472942   | T | 0.57 | -0.013 | 0.002 | 1.77E-09 | 0.015  | 0.008 | 4.30E-02 |
| Television | rs7834121   | G | 0.50 | -0.014 | 0.002 | 1.11E-10 | 0.006  | 0.008 | 3.50E-01 |
| Television | rs10739499  | C | 0.34 | 0.014  | 0.002 | 1.52E-09 | -0.008 | 0.008 | 2.60E-01 |
| Television | rs12342024  | G | 0.89 | -0.021 | 0.003 | 1.74E-09 | -0.041 | 0.012 | 9.50E-04 |
| Television | rs12554512  | T | 0.58 | 0.021  | 0.002 | 3.76E-21 | -0.002 | 0.008 | 7.10E-01 |
| Television | rs2073869   | C | 0.83 | 0.019  | 0.003 | 1.54E-10 | 0.005  | 0.010 | 9.10E-01 |
| Television | rs2291681   | G | 0.58 | 0.013  | 0.002 | 7.91E-09 | -0.001 | 0.008 | 9.50E-01 |
| Television | rs2616830   | G | 0.46 | 0.016  | 0.002 | 2.89E-14 | -0.011 | 0.008 | 8.10E-02 |
| Television | rs34864022  | A | 0.93 | -0.026 | 0.004 | 1.41E-09 | 0.009  | 0.016 | 5.10E-01 |
| Television | rs4382592   | T | 0.30 | 0.014  | 0.002 | 6.68E-09 | 0.013  | 0.008 | 5.90E-02 |
| Television | rs7043521   | A | 0.43 | 0.014  | 0.002 | 6.49E-11 | 0.013  | 0.008 | 9.80E-02 |
| Television | rs870151    | T | 0.53 | -0.016 | 0.002 | 8.82E-13 | -0.003 | 0.008 | 7.20E-01 |
| Television | rs10786658  | A | 0.41 | -0.014 | 0.002 | 4.63E-11 | 0.008  | 0.008 | 2.50E-01 |
| Television | rs11245482  | T | 0.61 | -0.013 | 0.002 | 2.57E-09 | -0.008 | 0.008 | 2.60E-01 |
| Television | rs1243182   | C | 0.69 | -0.019 | 0.002 | 2.03E-15 | -0.018 | 0.008 | 5.70E-02 |
| Television | rs17727474  | C | 0.83 | 0.018  | 0.003 | 3.07E-09 | 0.013  | 0.011 | 1.60E-01 |
| Television | rs2045147   | A | 0.45 | 0.013  | 0.002 | 5.87E-09 | -0.011 | 0.008 | 1.80E-01 |
| Television | rs11218575  | C | 0.57 | 0.015  | 0.002 | 2.08E-12 | 0.004  | 0.008 | 7.00E-01 |
| Television | rs17207890  | G | 0.66 | 0.016  | 0.002 | 6.73E-12 | 0.010  | 0.008 | 3.40E-01 |
| Television | rs648044    | A | 0.40 | -0.014 | 0.002 | 1.03E-09 | -0.014 | 0.008 | 6.40E-02 |
| Television | rs74802478  | G | 0.82 | 0.017  | 0.003 | 3.52E-09 | 0.003  | 0.010 | 7.20E-01 |
| Television | rs801733    | A | 0.64 | 0.017  | 0.002 | 7.32E-14 | 0.003  | 0.008 | 8.00E-01 |
| Television | rs10771746  | C | 0.72 | -0.014 | 0.002 | 2.46E-09 | -0.002 | 0.009 | 7.60E-01 |
| Television | rs10772643  | C | 0.11 | 0.025  | 0.003 | 1.32E-12 | 0.015  | 0.012 | 2.40E-01 |
| Television | rs10876864  | G | 0.43 | -0.013 | 0.002 | 1.01E-09 | -0.011 | 0.008 | 2.50E-01 |
| Television | rs2173650   | G | 0.85 | 0.018  | 0.003 | 4.56E-09 | 0.008  | 0.011 | 4.30E-01 |
| Television | rs74996610  | C | 0.95 | -0.031 | 0.005 | 4.10E-09 | 0.037  | 0.019 | 4.00E-02 |
| Television | rs8756      | C | 0.48 | -0.013 | 0.002 | 5.33E-10 | -0.024 | 0.008 | 2.90E-03 |
| Television | rs553397860 | A | 0.84 | 0.017  | 0.003 | 8.90E-09 | 0.009  | 0.011 | 3.60E-01 |
| Television | rs56858768  | G | 0.70 | -0.015 | 0.002 | 3.40E-10 | -0.002 | 0.009 | 7.80E-01 |
| Television | rs7991062   | C | 0.66 | -0.018 | 0.002 | 8.82E-15 | -0.004 | 0.008 | 8.10E-01 |
| Television | rs9563168   | G | 0.79 | 0.018  | 0.003 | 4.30E-11 | -0.005 | 0.010 | 6.70E-01 |
| Television | rs9569734   | A | 0.84 | 0.019  | 0.003 | 3.38E-10 | 0.016  | 0.011 | 1.10E-01 |
| Television | rs10145592  | C | 0.41 | -0.015 | 0.002 | 1.78E-11 | -0.013 | 0.008 | 1.40E-01 |
| Television | rs2460      | G | 0.74 | -0.015 | 0.002 | 4.96E-10 | -0.010 | 0.009 | 3.10E-01 |
| Television | rs61331678  | G | 0.57 | 0.015  | 0.002 | 6.06E-12 | 0.000  | 0.008 | 9.20E-01 |
| Television | rs142710267 | T | 0.65 | 0.016  | 0.002 | 6.65E-12 | -0.009 | 0.008 | 2.60E-01 |
| Television | rs7184800   | G | 0.70 | 0.017  | 0.002 | 8.18E-13 | 0.016  | 0.008 | 4.70E-02 |
| Television | rs7189927   | T | 0.36 | 0.015  | 0.002 | 3.36E-11 | 0.019  | 0.008 | 2.50E-02 |
| Television | rs749671    | G | 0.63 | 0.016  | 0.002 | 2.67E-12 | 0.002  | 0.008 | 8.10E-01 |
| Television | rs2447098   | C | 0.48 | -0.015 | 0.002 | 6.82E-12 | -0.004 | 0.008 | 6.90E-01 |
| Television | rs2584597   | T | 0.66 | 0.015  | 0.002 | 2.92E-10 | -0.008 | 0.009 | 3.80E-01 |
| Television | rs9902312   | T | 0.68 | 0.015  | 0.002 | 4.55E-11 | -0.010 | 0.008 | 2.00E-01 |
| Television | rs303753    | G | 0.65 | -0.014 | 0.002 | 2.74E-10 | -0.006 | 0.008 | 3.50E-01 |
| Television | rs9964724   | C | 0.32 | 0.018  | 0.002 | 3.34E-14 | 0.003  | 0.008 | 6.50E-01 |
| Television | rs111901094 | G | 0.82 | -0.017 | 0.003 | 1.98E-09 | -0.106 | 0.010 | 1.80E-25 |
| Television | rs7248205   | C | 0.40 | 0.014  | 0.002 | 3.35E-10 | 0.003  | 0.008 | 6.70E-01 |
| Television | rs56103247  | C | 0.94 | 0.030  | 0.005 | 3.78E-10 | 0.042  | 0.017 | 5.70E-03 |
| Television | rs6131281   | C | 0.60 | 0.016  | 0.002 | 3.07E-13 | 0.009  | 0.008 | 1.70E-01 |
| Television | rs6141814   | C | 0.61 | -0.014 | 0.002 | 1.31E-09 | -0.004 | 0.008 | 7.60E-01 |
| TG         | rs10797996  | C | 0.43 | 0.014  | 0.002 | 5.33E-12 | 0.020  | 0.008 | 7.00E-03 |

|    |             |   |      |        |       |           |        |       |          |
|----|-------------|---|------|--------|-------|-----------|--------|-------|----------|
| TG | rs10863828  | T | 0.76 | 0.013  | 0.002 | 1.79E-08  | -0.001 | 0.009 | 8.90E-01 |
| TG | rs11118310  | A | 0.41 | -0.019 | 0.002 | 2.33E-21  | -0.017 | 0.008 | 4.60E-02 |
| TG | rs11122450  | T | 0.39 | 0.048  | 0.002 | 9.96E-124 | 0.014  | 0.008 | 9.40E-02 |
| TG | rs11206374  | G | 0.78 | -0.025 | 0.002 | 8.75E-26  | -0.001 | 0.009 | 8.30E-01 |
| TG | rs11240358  | G | 0.61 | -0.013 | 0.002 | 4.03E-11  | -0.006 | 0.008 | 4.30E-01 |
| TG | rs114052230 | C | 0.83 | 0.020  | 0.003 | 3.48E-13  | 0.017  | 0.011 | 6.70E-02 |
| TG | rs114165349 | G | 0.98 | -0.082 | 0.007 | 3.96E-35  | -0.027 | 0.026 | 2.70E-01 |
| TG | rs12138136  | T | 0.91 | 0.025  | 0.004 | 4.62E-12  | 0.006  | 0.014 | 7.60E-01 |
| TG | rs12749691  | A | 0.70 | 0.020  | 0.002 | 1.09E-20  | -0.003 | 0.008 | 7.30E-01 |
| TG | rs1365297   | A | 0.82 | 0.018  | 0.003 | 9.21E-13  | -0.003 | 0.010 | 8.00E-01 |
| TG | rs184694823 | A | 0.92 | -0.021 | 0.004 | 1.80E-08  | -0.010 | 0.014 | 5.60E-01 |
| TG | rs1938566   | C | 0.17 | 0.021  | 0.003 | 1.61E-15  | 0.015  | 0.010 | 1.00E-01 |
| TG | rs2131311   | A | 0.29 | 0.012  | 0.002 | 3.32E-08  | 0.018  | 0.009 | 3.80E-02 |
| TG | rs213494    | C | 0.35 | -0.016 | 0.002 | 7.63E-14  | -0.011 | 0.008 | 2.10E-01 |
| TG | rs320369    | A | 0.32 | 0.012  | 0.002 | 1.13E-08  | -0.007 | 0.008 | 2.50E-01 |
| TG | rs36043408  | G | 0.50 | 0.013  | 0.002 | 1.04E-10  | 0.009  | 0.008 | 2.10E-01 |
| TG | rs61780049  | A | 0.85 | -0.015 | 0.003 | 3.17E-08  | -0.025 | 0.011 | 2.60E-02 |
| TG | rs61830291  | A | 0.90 | -0.029 | 0.003 | 1.26E-17  | -0.023 | 0.013 | 7.40E-02 |
| TG | rs6424109   | C | 0.13 | -0.020 | 0.003 | 3.13E-11  | 0.007  | 0.012 | 5.10E-01 |
| TG | rs6690181   | T | 0.62 | 0.014  | 0.002 | 1.48E-11  | 0.015  | 0.008 | 6.50E-02 |
| TG | rs6700266   | G | 0.66 | 0.013  | 0.002 | 2.05E-09  | -0.010 | 0.008 | 3.10E-01 |
| TG | rs72904737  | G | 0.91 | 0.027  | 0.004 | 1.22E-14  | 0.009  | 0.014 | 4.70E-01 |
| TG | rs880315    | T | 0.66 | 0.012  | 0.002 | 1.57E-08  | 0.011  | 0.008 | 7.60E-02 |
| TG | rs9436661   | T | 0.65 | 0.078  | 0.002 | 5.14E-304 | -0.004 | 0.008 | 8.30E-01 |
| TG | rs9970140   | A | 0.92 | 0.025  | 0.004 | 1.45E-11  | -0.035 | 0.015 | 2.20E-02 |
| TG | rs1009360   | T | 0.58 | 0.019  | 0.002 | 2.99E-20  | 0.009  | 0.008 | 3.20E-01 |
| TG | rs10172544  | C | 0.59 | 0.011  | 0.002 | 1.55E-08  | 0.012  | 0.008 | 8.40E-02 |
| TG | rs10176110  | T | 0.87 | -0.024 | 0.003 | 8.37E-16  | -0.010 | 0.012 | 3.40E-01 |
| TG | rs10180284  | C | 0.52 | 0.011  | 0.002 | 8.69E-09  | 0.015  | 0.008 | 9.30E-02 |
| TG | rs12472667  | C | 0.63 | -0.014 | 0.002 | 2.21E-11  | -0.018 | 0.008 | 2.60E-02 |
| TG | rs13389219  | C | 0.61 | 0.037  | 0.002 | 7.74E-76  | 0.036  | 0.008 | 1.00E-05 |
| TG | rs17326656  | G | 0.76 | -0.018 | 0.002 | 4.13E-14  | -0.022 | 0.009 | 1.40E-02 |
| TG | rs182636083 | C | 0.48 | 0.027  | 0.002 | 7.38E-32  | 0.004  | 0.009 | 4.50E-01 |
| TG | rs1861435   | T | 0.58 | 0.014  | 0.002 | 2.53E-12  | 0.015  | 0.008 | 5.80E-02 |
| TG | rs2110690   | A | 0.49 | -0.011 | 0.002 | 4.30E-08  | -0.010 | 0.008 | 1.80E-01 |
| TG | rs2382825   | C | 0.38 | 0.013  | 0.002 | 1.64E-10  | 0.030  | 0.008 | 8.80E-05 |
| TG | rs2943645   | C | 0.35 | -0.040 | 0.002 | 1.15E-83  | -0.018 | 0.008 | 2.00E-02 |
| TG | rs3731696   | A | 0.88 | -0.022 | 0.003 | 6.42E-13  | 0.006  | 0.012 | 6.90E-01 |
| TG | rs3820897   | T | 0.18 | -0.020 | 0.003 | 3.82E-14  | -0.015 | 0.010 | 1.40E-01 |
| TG | rs4128205   | A | 0.49 | -0.012 | 0.002 | 5.04E-09  | -0.016 | 0.008 | 3.90E-02 |
| TG | rs4662414   | A | 0.55 | 0.012  | 0.002 | 2.13E-09  | -0.018 | 0.008 | 1.60E-02 |
| TG | rs4665972   | T | 0.40 | 0.100  | 0.002 | 0.00E+00  | 0.037  | 0.008 | 1.50E-06 |
| TG | rs4675812   | G | 0.41 | 0.014  | 0.002 | 9.79E-13  | 0.011  | 0.008 | 1.80E-01 |
| TG | rs57074291  | C | 0.74 | 0.014  | 0.002 | 4.30E-10  | 0.003  | 0.009 | 7.40E-01 |
| TG | rs58839393  | A | 0.84 | -0.017 | 0.003 | 1.80E-10  | -0.023 | 0.011 | 3.10E-02 |
| TG | rs62130120  | G | 0.54 | 0.011  | 0.002 | 4.15E-08  | -0.003 | 0.008 | 6.90E-01 |
| TG | rs6531216   | G | 0.47 | -0.018 | 0.002 | 2.40E-20  | -0.016 | 0.008 | 7.20E-02 |
| TG | rs6708784   | A | 0.51 | 0.013  | 0.002 | 1.90E-10  | 0.000  | 0.008 | 9.60E-01 |
| TG | rs6722159   | T | 0.51 | 0.011  | 0.002 | 3.05E-08  | 0.009  | 0.008 | 2.00E-01 |
| TG | rs676210    | G | 0.79 | 0.073  | 0.002 | 5.54E-197 | 0.004  | 0.010 | 6.10E-01 |
| TG | rs72917533  | T | 0.81 | 0.014  | 0.003 | 3.79E-08  | 0.017  | 0.010 | 8.30E-02 |
| TG | rs7424120   | C | 0.40 | 0.012  | 0.002 | 5.68E-09  | -0.010 | 0.008 | 2.70E-01 |
| TG | rs75225803  | C | 0.91 | 0.024  | 0.004 | 3.46E-11  | 0.018  | 0.014 | 1.70E-01 |
| TG | rs7596814   | G | 0.71 | 0.013  | 0.002 | 7.31E-09  | 0.014  | 0.008 | 6.10E-02 |
| TG | rs76172517  | T | 0.89 | 0.018  | 0.003 | 1.53E-08  | 0.020  | 0.012 | 1.40E-01 |
| TG | rs77631110  | A | 0.98 | -0.053 | 0.008 | 7.28E-11  | 0.029  | 0.031 | 3.70E-01 |

|    |             |   |      |        |       |          |        |       |          |
|----|-------------|---|------|--------|-------|----------|--------|-------|----------|
| TG | rs78058190  | G | 0.95 | -0.082 | 0.005 | 3.15E-57 | -0.024 | 0.020 | 2.70E-01 |
| TG | rs935168    | G | 0.35 | -0.014 | 0.002 | 8.07E-12 | -0.011 | 0.008 | 1.10E-01 |
| TG | rs954244    | C | 0.75 | -0.015 | 0.002 | 1.91E-11 | -0.022 | 0.009 | 6.30E-03 |
| TG | rs1152847   | G | 0.65 | 0.012  | 0.002 | 2.65E-08 | 0.006  | 0.008 | 5.00E-01 |
| TG | rs13066793  | A | 0.91 | 0.022  | 0.003 | 1.05E-10 | 0.031  | 0.013 | 1.90E-02 |
| TG | rs2194411   | G | 0.87 | 0.017  | 0.003 | 1.31E-08 | 0.036  | 0.012 | 2.10E-03 |
| TG | rs2342371   | G | 0.27 | 0.013  | 0.002 | 1.16E-08 | 0.002  | 0.009 | 7.60E-01 |
| TG | rs2455821   | C | 0.73 | -0.013 | 0.002 | 2.25E-09 | -0.018 | 0.009 | 3.80E-02 |
| TG | rs3103310   | A | 0.76 | -0.020 | 0.002 | 6.23E-18 | -0.018 | 0.009 | 4.20E-02 |
| TG | rs5402      | T | 0.88 | -0.024 | 0.003 | 1.59E-15 | -0.024 | 0.012 | 3.40E-02 |
| TG | rs62271373  | T | 0.94 | -0.042 | 0.004 | 5.70E-23 | -0.046 | 0.017 | 6.40E-03 |
| TG | rs6792725   | A | 0.31 | 0.015  | 0.002 | 3.51E-12 | -0.005 | 0.009 | 5.00E-01 |
| TG | rs6798755   | C | 0.93 | 0.025  | 0.004 | 2.45E-10 | 0.047  | 0.016 | 3.00E-03 |
| TG | rs6800707   | C | 0.19 | -0.030 | 0.003 | 1.24E-31 | 0.001  | 0.010 | 8.60E-01 |
| TG | rs6805924   | G | 0.57 | -0.011 | 0.002 | 4.79E-08 | 0.008  | 0.008 | 3.50E-01 |
| TG | rs684773    | A | 0.23 | -0.029 | 0.002 | 3.00E-35 | -0.013 | 0.009 | 1.90E-01 |
| TG | rs7631606   | T | 0.73 | 0.014  | 0.002 | 1.05E-09 | 0.014  | 0.009 | 1.10E-01 |
| TG | rs79287178  | G | 0.97 | -0.050 | 0.006 | 7.02E-17 | -0.009 | 0.023 | 6.70E-01 |
| TG | rs79983121  | C | 0.80 | -0.015 | 0.002 | 9.02E-10 | -0.023 | 0.010 | 9.60E-03 |
| TG | rs9812100   | G | 0.52 | 0.013  | 0.002 | 2.25E-10 | 0.007  | 0.008 | 3.30E-01 |
| TG | rs9831084   | T | 0.54 | 0.012  | 0.002 | 6.07E-09 | 0.012  | 0.008 | 1.60E-01 |
| TG | rs11100083  | T | 0.77 | 0.016  | 0.002 | 1.36E-11 | 0.011  | 0.009 | 2.60E-01 |
| TG | rs1126673   | C | 0.30 | -0.014 | 0.002 | 1.40E-10 | 0.015  | 0.008 | 7.70E-02 |
| TG | rs11722924  | G | 0.46 | -0.013 | 0.002 | 1.08E-10 | 0.017  | 0.008 | 3.20E-02 |
| TG | rs12504746  | C | 0.81 | 0.015  | 0.003 | 1.96E-09 | 0.006  | 0.010 | 5.70E-01 |
| TG | rs13101719  | T | 0.58 | -0.020 | 0.002 | 4.09E-16 | -0.013 | 0.009 | 1.50E-01 |
| TG | rs13101828  | A | 0.55 | 0.012  | 0.002 | 1.49E-09 | 0.008  | 0.008 | 2.30E-01 |
| TG | rs13107325  | C | 0.93 | -0.030 | 0.004 | 5.73E-15 | -0.011 | 0.015 | 4.00E-01 |
| TG | rs13108218  | A | 0.39 | 0.031  | 0.002 | 8.21E-50 | 0.005  | 0.008 | 5.60E-01 |
| TG | rs1347188   | A | 0.75 | -0.014 | 0.002 | 1.66E-09 | -0.004 | 0.009 | 6.60E-01 |
| TG | rs2035816   | A | 0.92 | 0.028  | 0.004 | 5.65E-15 | 0.062  | 0.014 | 9.20E-06 |
| TG | rs2237029   | G | 0.40 | 0.014  | 0.002 | 8.47E-12 | 0.006  | 0.008 | 4.20E-01 |
| TG | rs3775228   | C | 0.60 | -0.034 | 0.002 | 2.55E-62 | -0.005 | 0.008 | 5.60E-01 |
| TG | rs3822072   | G | 0.55 | -0.015 | 0.002 | 4.57E-14 | -0.011 | 0.008 | 1.10E-01 |
| TG | rs4450871   | A | 0.56 | 0.014  | 0.002 | 5.82E-12 | 0.014  | 0.008 | 1.30E-01 |
| TG | rs71603401  | A | 0.86 | -0.026 | 0.003 | 1.68E-19 | -0.011 | 0.011 | 2.40E-01 |
| TG | rs73243877  | A | 0.83 | -0.029 | 0.003 | 9.68E-28 | -0.017 | 0.010 | 7.60E-02 |
| TG | rs7681288   | G | 0.34 | -0.012 | 0.002 | 1.58E-08 | 0.018  | 0.008 | 3.30E-02 |
| TG | rs7694869   | A | 0.38 | 0.011  | 0.002 | 4.92E-08 | -0.007 | 0.008 | 3.30E-01 |
| TG | rs78025076  | C | 0.98 | -0.048 | 0.007 | 6.35E-12 | 0.009  | 0.028 | 5.00E-01 |
| TG | rs1030472   | A | 0.79 | -0.023 | 0.002 | 8.60E-21 | -0.021 | 0.010 | 2.90E-02 |
| TG | rs1045241   | C | 0.73 | 0.021  | 0.002 | 2.35E-20 | 0.005  | 0.009 | 5.40E-01 |
| TG | rs112424890 | C | 0.82 | -0.017 | 0.003 | 3.66E-11 | -0.003 | 0.010 | 7.20E-01 |
| TG | rs11746801  | G | 0.36 | 0.012  | 0.002 | 2.47E-09 | 0.015  | 0.008 | 6.60E-02 |
| TG | rs1316753   | G | 0.61 | 0.015  | 0.002 | 8.34E-13 | 0.008  | 0.008 | 1.80E-01 |
| TG | rs193735    | G | 0.96 | -0.033 | 0.005 | 7.07E-10 | 0.020  | 0.020 | 2.90E-01 |
| TG | rs325485    | A | 0.40 | 0.012  | 0.002 | 9.42E-09 | 0.017  | 0.008 | 1.90E-02 |
| TG | rs34580448  | T | 0.96 | 0.034  | 0.005 | 1.06E-11 | 0.014  | 0.020 | 6.40E-01 |
| TG | rs37538     | G | 0.40 | 0.014  | 0.002 | 1.42E-12 | 0.006  | 0.008 | 3.60E-01 |
| TG | rs3936511   | A | 0.81 | -0.046 | 0.003 | 6.03E-74 | -0.041 | 0.010 | 3.90E-05 |
| TG | rs4976033   | A | 0.60 | -0.018 | 0.002 | 2.93E-18 | -0.012 | 0.008 | 1.60E-01 |
| TG | rs55646464  | G | 0.70 | -0.012 | 0.002 | 1.29E-08 | -0.004 | 0.008 | 4.70E-01 |
| TG | rs62397245  | C | 0.78 | -0.015 | 0.002 | 4.49E-10 | -0.019 | 0.009 | 6.00E-02 |
| TG | rs6882076   | T | 0.37 | -0.033 | 0.002 | 1.93E-57 | 0.018  | 0.008 | 2.40E-02 |
| TG | rs7244      | G | 0.83 | -0.015 | 0.003 | 5.61E-09 | -0.011 | 0.010 | 4.20E-01 |
| TG | rs72801474  | G | 0.91 | 0.031  | 0.003 | 4.51E-19 | 0.040  | 0.013 | 2.70E-03 |

|    |             |   |      |        |       |          |        |       |          |
|----|-------------|---|------|--------|-------|----------|--------|-------|----------|
| TG | rs76957426  | C | 0.70 | -0.012 | 0.002 | 2.29E-08 | -0.004 | 0.008 | 5.10E-01 |
| TG | rs7704653   | A | 0.28 | -0.016 | 0.002 | 4.00E-12 | -0.002 | 0.009 | 9.90E-01 |
| TG | rs7714361   | A | 0.77 | -0.014 | 0.002 | 8.81E-09 | -0.006 | 0.009 | 5.60E-01 |
| TG | rs7735249   | C | 0.89 | -0.027 | 0.003 | 1.96E-17 | 0.001  | 0.012 | 8.30E-01 |
| TG | rs1281978   | C | 0.47 | 0.011  | 0.002 | 1.02E-08 | -0.002 | 0.008 | 6.70E-01 |
| TG | rs138191773 | G | 0.98 | 0.048  | 0.008 | 1.72E-09 | 0.033  | 0.031 | 2.30E-01 |
| TG | rs1835346   | A | 0.98 | 0.039  | 0.007 | 3.05E-09 | 0.030  | 0.025 | 2.10E-01 |
| TG | rs185139895 | G | 0.96 | -0.043 | 0.005 | 1.28E-18 | -0.052 | 0.019 | 5.40E-03 |
| TG | rs186696265 | C | 0.99 | 0.104  | 0.008 | 4.84E-36 | 0.074  | 0.033 | 4.00E-02 |
| TG | rs192955957 | C | 0.90 | -0.046 | 0.004 | 5.43E-28 | 0.002  | 0.016 | 8.50E-01 |
| TG | rs2277083   | A | 0.44 | 0.015  | 0.002 | 2.07E-14 | 0.013  | 0.008 | 8.50E-02 |
| TG | rs2499797   | G | 0.16 | 0.015  | 0.003 | 9.38E-09 | 0.017  | 0.011 | 9.40E-02 |
| TG | rs28383314  | T | 0.38 | -0.038 | 0.002 | 4.20E-76 | -0.008 | 0.008 | 2.80E-01 |
| TG | rs41273040  | G | 0.98 | -0.057 | 0.007 | 4.03E-18 | 0.000  | 0.026 | 9.00E-01 |
| TG | rs4134963   | C | 0.81 | 0.019  | 0.003 | 1.50E-13 | 0.020  | 0.010 | 3.30E-02 |
| TG | rs41552812  | C | 0.93 | 0.057  | 0.005 | 3.15E-29 | 0.032  | 0.020 | 1.50E-01 |
| TG | rs4709746   | C | 0.87 | 0.019  | 0.003 | 6.09E-11 | 0.029  | 0.011 | 1.80E-02 |
| TG | rs4714001   | G | 0.36 | -0.012 | 0.002 | 4.40E-09 | -0.003 | 0.008 | 6.20E-01 |
| TG | rs540973884 | T | 0.40 | 0.029  | 0.002 | 3.06E-45 | 0.013  | 0.008 | 6.60E-02 |
| TG | rs62427982  | C | 0.68 | 0.013  | 0.002 | 1.14E-09 | 0.022  | 0.008 | 7.00E-03 |
| TG | rs6458869   | C | 0.36 | 0.018  | 0.002 | 7.10E-18 | 0.011  | 0.008 | 1.60E-01 |
| TG | rs6913325   | G | 0.55 | 0.011  | 0.002 | 3.23E-08 | 0.004  | 0.008 | 6.40E-01 |
| TG | rs6916318   | A | 0.47 | -0.027 | 0.002 | 1.84E-40 | -0.029 | 0.008 | 4.20E-04 |
| TG | rs6924805   | G | 0.41 | 0.011  | 0.002 | 3.67E-08 | -0.003 | 0.008 | 6.80E-01 |
| TG | rs729761    | T | 0.29 | -0.018 | 0.002 | 1.12E-15 | 0.001  | 0.009 | 7.60E-01 |
| TG | rs73025562  | G | 0.75 | -0.014 | 0.002 | 2.32E-09 | 0.011  | 0.009 | 2.40E-01 |
| TG | rs77009508  | A | 0.93 | -0.045 | 0.004 | 4.40E-32 | -0.015 | 0.015 | 3.10E-01 |
| TG | rs78588343  | G | 0.82 | 0.016  | 0.003 | 1.70E-09 | 0.014  | 0.010 | 2.10E-01 |
| TG | rs9274390   | C | 0.86 | 0.030  | 0.003 | 1.40E-18 | 0.019  | 0.013 | 2.10E-01 |
| TG | rs9375694   | G | 0.30 | -0.017 | 0.002 | 7.38E-16 | -0.020 | 0.008 | 2.50E-02 |
| TG | rs9376511   | A | 0.80 | 0.015  | 0.002 | 9.07E-10 | 0.005  | 0.010 | 7.40E-01 |
| TG | rs9480889   | C | 0.22 | -0.016 | 0.002 | 1.30E-11 | 0.005  | 0.009 | 6.20E-01 |
| TG | rs9496567   | G | 0.76 | 0.014  | 0.002 | 5.27E-09 | -0.013 | 0.009 | 1.80E-01 |
| TG | rs998584    | C | 0.52 | -0.040 | 0.002 | 4.93E-89 | -0.018 | 0.008 | 2.20E-02 |
| TG | rs10242866  | C | 0.60 | -0.016 | 0.002 | 1.76E-14 | 0.009  | 0.008 | 3.00E-01 |
| TG | rs10243434  | T | 0.41 | 0.017  | 0.002 | 1.36E-15 | 0.009  | 0.008 | 1.80E-01 |
| TG | rs111914893 | C | 0.95 | -0.028 | 0.005 | 1.09E-09 | -0.026 | 0.018 | 1.60E-01 |
| TG | rs11980456  | G | 0.71 | -0.012 | 0.002 | 2.64E-08 | 0.005  | 0.009 | 5.50E-01 |
| TG | rs12530679  | A | 0.52 | 0.012  | 0.002 | 1.13E-09 | 0.009  | 0.008 | 2.30E-01 |
| TG | rs12669911  | A | 0.39 | 0.012  | 0.002 | 1.17E-08 | 0.018  | 0.008 | 4.20E-02 |
| TG | rs139453187 | T | 0.93 | -0.023 | 0.004 | 3.28E-09 | -0.029 | 0.015 | 1.10E-01 |
| TG | rs1799831   | C | 0.84 | -0.025 | 0.003 | 3.44E-19 | -0.009 | 0.011 | 4.00E-01 |
| TG | rs2240466   | G | 0.88 | 0.123  | 0.003 | 0.00E+00 | -0.016 | 0.012 | 1.60E-01 |
| TG | rs2699805   | G | 0.60 | 0.020  | 0.002 | 2.37E-23 | 0.009  | 0.008 | 2.40E-01 |
| TG | rs41785     | C | 0.58 | 0.015  | 0.002 | 1.84E-13 | -0.004 | 0.008 | 5.60E-01 |
| TG | rs4722551   | T | 0.84 | 0.037  | 0.003 | 1.43E-42 | 0.016  | 0.011 | 8.70E-02 |
| TG | rs4731701   | C | 0.51 | 0.033  | 0.002 | 3.31E-61 | 0.012  | 0.008 | 7.50E-02 |
| TG | rs498475    | G | 0.37 | 0.012  | 0.002 | 1.66E-08 | 0.024  | 0.008 | 2.60E-03 |
| TG | rs535241194 | A | 0.79 | -0.021 | 0.002 | 2.85E-17 | -0.018 | 0.010 | 7.90E-02 |
| TG | rs56321085  | G | 0.92 | -0.020 | 0.004 | 4.80E-08 | -0.012 | 0.014 | 3.80E-01 |
| TG | rs62459095  | C | 0.94 | 0.032  | 0.004 | 7.67E-14 | -0.016 | 0.017 | 4.90E-01 |
| TG | rs62473520  | T | 0.92 | 0.021  | 0.004 | 2.90E-08 | -0.021 | 0.015 | 1.90E-01 |
| TG | rs6465120   | A | 0.51 | 0.013  | 0.002 | 2.59E-10 | 0.000  | 0.008 | 9.10E-01 |
| TG | rs6968865   | A | 0.37 | -0.015 | 0.002 | 8.33E-14 | -0.003 | 0.008 | 4.30E-01 |
| TG | rs71538127  | C | 0.88 | -0.017 | 0.003 | 1.29E-08 | -0.004 | 0.012 | 8.30E-01 |
| TG | rs72555385  | A | 0.95 | -0.065 | 0.005 | 7.88E-45 | -0.001 | 0.018 | 7.20E-01 |



|    |             |   |      |        |       |           |        |       |          |
|----|-------------|---|------|--------|-------|-----------|--------|-------|----------|
| TG | rs852388    | G | 0.79 | -0.015 | 0.002 | 8.67E-10  | -0.027 | 0.010 | 2.10E-03 |
| TG | rs113266765 | C | 0.97 | 0.033  | 0.006 | 1.01E-08  | 0.022  | 0.023 | 2.70E-01 |
| TG | rs114443260 | C | 0.73 | -0.028 | 0.002 | 1.08E-36  | -0.016 | 0.009 | 5.50E-02 |
| TG | rs1149470   | T | 0.24 | 0.014  | 0.002 | 1.32E-09  | 0.022  | 0.009 | 2.00E-02 |
| TG | rs11781692  | C | 0.99 | -0.075 | 0.008 | 2.40E-19  | 0.033  | 0.033 | 4.00E-01 |
| TG | rs13269725  | A | 0.92 | -0.035 | 0.004 | 3.95E-21  | -0.025 | 0.014 | 7.50E-02 |
| TG | rs147011441 | G | 0.98 | -0.042 | 0.007 | 1.20E-10  | 0.000  | 0.026 | 9.70E-01 |
| TG | rs1495741   | G | 0.22 | 0.038  | 0.002 | 6.59E-56  | -0.008 | 0.009 | 3.70E-01 |
| TG | rs150564454 | G | 0.99 | 0.102  | 0.010 | 4.61E-26  | 0.013  | 0.037 | 7.00E-01 |
| TG | rs1561928   | A | 0.12 | -0.019 | 0.003 | 2.04E-09  | -0.006 | 0.012 | 6.80E-01 |
| TG | rs2054067   | A | 0.63 | 0.011  | 0.002 | 4.49E-08  | 0.002  | 0.008 | 6.60E-01 |
| TG | rs2081687   | T | 0.34 | 0.026  | 0.002 | 5.82E-36  | 0.015  | 0.008 | 5.10E-02 |
| TG | rs308       | T | 0.98 | 0.159  | 0.007 | 6.48E-115 | -0.024 | 0.028 | 5.30E-01 |
| TG | rs343       | C | 0.92 | 0.141  | 0.004 | 0.00E+00  | 0.034  | 0.014 | 2.80E-02 |
| TG | rs34893217  | G | 0.89 | 0.018  | 0.003 | 2.31E-08  | 0.006  | 0.013 | 6.40E-01 |
| TG | rs35859536  | C | 0.69 | 0.014  | 0.002 | 2.62E-11  | -0.005 | 0.008 | 7.20E-01 |
| TG | rs36061954  | C | 0.60 | -0.012 | 0.002 | 3.66E-09  | -0.003 | 0.008 | 8.60E-01 |
| TG | rs3808477   | C | 0.72 | 0.013  | 0.002 | 2.20E-09  | 0.002  | 0.009 | 6.70E-01 |
| TG | rs383091    | T | 0.37 | -0.013 | 0.002 | 5.43E-10  | -0.005 | 0.008 | 4.90E-01 |
| TG | rs4500049   | A | 0.47 | 0.028  | 0.002 | 2.66E-44  | -0.001 | 0.008 | 8.80E-01 |
| TG | rs6999569   | A | 0.53 | 0.086  | 0.002 | 0.00E+00  | 0.036  | 0.008 | 2.80E-06 |
| TG | rs7000494   | G | 0.97 | -0.136 | 0.006 | 4.11E-120 | -0.031 | 0.023 | 1.70E-01 |
| TG | rs7018436   | T | 0.69 | -0.015 | 0.002 | 2.73E-12  | -0.008 | 0.008 | 3.50E-01 |
| TG | rs72691637  | G | 0.81 | 0.015  | 0.003 | 2.91E-09  | 0.003  | 0.010 | 8.60E-01 |
| TG | rs75609851  | G | 0.99 | 0.199  | 0.010 | 4.79E-87  | -0.009 | 0.040 | 7.40E-01 |
| TG | rs7826246   | A | 0.90 | -0.020 | 0.004 | 4.20E-08  | 0.019  | 0.014 | 1.60E-01 |
| TG | rs78376313  | T | 0.97 | -0.048 | 0.006 | 4.45E-17  | -0.008 | 0.023 | 5.50E-01 |
| TG | rs79153732  | C | 0.98 | -0.077 | 0.008 | 4.00E-24  | 0.080  | 0.030 | 4.00E-03 |
| TG | rs10797119  | T | 0.46 | -0.016 | 0.002 | 5.43E-15  | -0.009 | 0.008 | 2.10E-01 |
| TG | rs10811662  | G | 0.83 | 0.015  | 0.003 | 5.91E-09  | -0.003 | 0.010 | 7.20E-01 |
| TG | rs10962680  | C | 0.26 | 0.014  | 0.002 | 6.68E-09  | 0.002  | 0.009 | 7.20E-01 |
| TG | rs1567353   | C | 0.69 | -0.015 | 0.002 | 3.38E-12  | -0.004 | 0.008 | 7.10E-01 |
| TG | rs1800978   | C | 0.88 | 0.027  | 0.003 | 1.08E-18  | -0.023 | 0.012 | 7.10E-02 |
| TG | rs2131919   | A | 0.84 | -0.017 | 0.003 | 1.34E-10  | -0.011 | 0.010 | 2.70E-01 |
| TG | rs2416759   | G | 0.30 | -0.012 | 0.002 | 2.91E-08  | -0.012 | 0.008 | 1.40E-01 |
| TG | rs2519093   | C | 0.82 | 0.021  | 0.003 | 1.29E-16  | -0.022 | 0.010 | 2.40E-02 |
| TG | rs4382584   | G | 0.73 | -0.013 | 0.002 | 5.71E-09  | 0.013  | 0.009 | 1.50E-01 |
| TG | rs4564007   | T | 0.32 | 0.012  | 0.002 | 1.07E-08  | 0.015  | 0.008 | 3.90E-02 |
| TG | rs581080    | G | 0.18 | -0.018 | 0.003 | 1.32E-11  | -0.012 | 0.010 | 1.90E-01 |
| TG | rs62565259  | C | 0.83 | 0.017  | 0.003 | 1.58E-10  | 0.011  | 0.010 | 2.50E-01 |
| TG | rs696825    | C | 0.75 | 0.020  | 0.002 | 5.72E-19  | 0.020  | 0.009 | 1.70E-02 |
| TG | rs77824033  | T | 0.96 | 0.030  | 0.005 | 1.34E-08  | -0.014 | 0.021 | 4.30E-01 |
| TG | rs7855395   | A | 0.43 | 0.012  | 0.002 | 6.47E-09  | 0.002  | 0.008 | 7.50E-01 |
| TG | rs10822163  | C | 0.53 | 0.032  | 0.002 | 2.30E-57  | -0.003 | 0.008 | 8.50E-01 |
| TG | rs11187027  | G | 0.79 | -0.015 | 0.002 | 3.38E-10  | -0.020 | 0.009 | 3.00E-02 |
| TG | rs1133400   | A | 0.78 | -0.014 | 0.002 | 1.02E-08  | 0.003  | 0.009 | 7.00E-01 |
| TG | rs113344423 | G | 0.94 | -0.043 | 0.004 | 1.60E-23  | -0.016 | 0.016 | 4.50E-01 |
| TG | rs1171617   | G | 0.23 | -0.016 | 0.002 | 2.39E-11  | 0.005  | 0.009 | 7.00E-01 |
| TG | rs12415159  | A | 0.85 | -0.021 | 0.003 | 1.28E-13  | 0.030  | 0.011 | 5.30E-03 |
| TG | rs140107293 | A | 0.85 | 0.023  | 0.003 | 2.75E-16  | 0.029  | 0.011 | 3.70E-03 |
| TG | rs2068888   | G | 0.55 | 0.032  | 0.002 | 4.06E-57  | 0.013  | 0.008 | 8.30E-02 |
| TG | rs2420477   | T | 0.47 | 0.011  | 0.002 | 2.62E-08  | 0.020  | 0.008 | 9.70E-03 |
| TG | rs2487294   | G | 0.28 | -0.018 | 0.002 | 1.53E-16  | 0.053  | 0.009 | 4.10E-09 |
| TG | rs2773469   | A | 0.27 | 0.019  | 0.002 | 1.59E-16  | 0.004  | 0.009 | 7.40E-01 |
| TG | rs3758413   | T | 0.58 | -0.011 | 0.002 | 1.76E-08  | -0.014 | 0.008 | 9.90E-02 |
| TG | rs3829126   | G | 0.91 | -0.023 | 0.003 | 2.20E-11  | -0.003 | 0.013 | 7.50E-01 |

|    |             |   |      |        |       |           |        |       |          |
|----|-------------|---|------|--------|-------|-----------|--------|-------|----------|
| TG | rs55767272  | A | 0.93 | 0.028  | 0.004 | 5.97E-12  | 0.041  | 0.016 | 1.30E-02 |
| TG | rs563296    | G | 0.44 | -0.016 | 0.002 | 5.55E-16  | -0.011 | 0.008 | 9.70E-02 |
| TG | rs7077812   | T | 0.81 | -0.014 | 0.003 | 2.20E-08  | -0.006 | 0.010 | 3.80E-01 |
| TG | rs71473777  | A | 0.88 | -0.019 | 0.003 | 8.18E-10  | -0.027 | 0.012 | 1.90E-02 |
| TG | rs75398587  | C | 0.93 | 0.025  | 0.004 | 1.10E-10  | -0.019 | 0.016 | 2.30E-01 |
| TG | rs80276949  | G | 0.98 | -0.045 | 0.007 | 1.16E-11  | -0.039 | 0.025 | 1.30E-01 |
| TG | rs878409    | G | 0.46 | 0.011  | 0.002 | 2.07E-08  | 0.002  | 0.008 | 7.00E-01 |
| TG | rs973709    | G | 0.44 | 0.011  | 0.002 | 4.52E-08  | -0.009 | 0.008 | 2.80E-01 |
| TG | rs1064939   | A | 0.98 | 0.054  | 0.007 | 1.63E-15  | 0.076  | 0.026 | 2.60E-03 |
| TG | rs10750766  | C | 0.29 | -0.020 | 0.002 | 3.94E-19  | -0.009 | 0.009 | 3.00E-01 |
| TG | rs10899490  | C | 0.84 | 0.017  | 0.003 | 2.40E-10  | -0.016 | 0.011 | 2.00E-01 |
| TG | rs11030107  | A | 0.74 | -0.016 | 0.002 | 8.55E-13  | -0.019 | 0.009 | 4.80E-02 |
| TG | rs11228377  | T | 0.41 | 0.015  | 0.002 | 2.50E-14  | -0.001 | 0.008 | 8.00E-01 |
| TG | rs11231161  | A | 0.63 | -0.017 | 0.002 | 9.20E-16  | -0.005 | 0.008 | 4.30E-01 |
| TG | rs117291242 | C | 0.96 | -0.030 | 0.005 | 1.38E-08  | 0.019  | 0.020 | 4.50E-01 |
| TG | rs150555490 | C | 0.94 | 0.039  | 0.004 | 1.48E-19  | -0.008 | 0.016 | 7.00E-01 |
| TG | rs174566    | A | 0.65 | -0.049 | 0.002 | 2.13E-120 | 0.000  | 0.008 | 1.00E+00 |
| TG | rs2850245   | G | 0.37 | 0.017  | 0.002 | 9.24E-16  | 0.006  | 0.008 | 5.20E-01 |
| TG | rs326222    | T | 0.30 | -0.025 | 0.002 | 1.69E-31  | -0.012 | 0.008 | 1.30E-01 |
| TG | rs480823    | T | 0.92 | -0.156 | 0.004 | 0.00E+00  | -0.014 | 0.014 | 3.70E-01 |
| TG | rs490972    | G | 0.53 | -0.014 | 0.002 | 1.06E-12  | -0.012 | 0.008 | 1.10E-01 |
| TG | rs4909945   | T | 0.31 | -0.013 | 0.002 | 1.24E-09  | -0.009 | 0.008 | 2.60E-01 |
| TG | rs499293    | G | 0.34 | 0.012  | 0.002 | 1.71E-08  | 0.017  | 0.008 | 2.10E-02 |
| TG | rs56271783  | G | 0.95 | -0.067 | 0.005 | 7.90E-44  | -0.020 | 0.019 | 3.40E-01 |
| TG | rs61885960  | T | 0.95 | 0.032  | 0.004 | 8.02E-13  | 0.039  | 0.017 | 1.40E-02 |
| TG | rs61905078  | A | 0.93 | -0.200 | 0.004 | 0.00E+00  | -0.005 | 0.015 | 7.30E-01 |
| TG | rs6486122   | C | 0.31 | -0.020 | 0.002 | 2.98E-20  | -0.015 | 0.008 | 8.60E-02 |
| TG | rs75268115  | A | 0.92 | 0.020  | 0.004 | 1.23E-08  | 0.011  | 0.014 | 3.80E-01 |
| TG | rs78297458  | T | 0.98 | 0.039  | 0.007 | 1.34E-08  | 0.039  | 0.026 | 1.30E-01 |
| TG | rs78484485  | G | 0.95 | 0.076  | 0.004 | 6.37E-67  | 0.017  | 0.017 | 2.50E-01 |
| TG | rs79357714  | A | 0.95 | 0.029  | 0.005 | 1.58E-09  | -0.005 | 0.019 | 8.30E-01 |
| TG | rs79634051  | G | 0.97 | 0.043  | 0.006 | 1.42E-12  | 0.011  | 0.023 | 6.10E-01 |
| TG | rs10842703  | A | 0.76 | -0.015 | 0.002 | 2.05E-10  | -0.012 | 0.009 | 1.30E-01 |
| TG | rs112403212 | C | 0.86 | -0.017 | 0.003 | 1.37E-09  | 0.003  | 0.011 | 8.30E-01 |
| TG | rs113439801 | C | 0.83 | 0.017  | 0.003 | 7.20E-11  | -0.003 | 0.010 | 7.80E-01 |
| TG | rs12422600  | G | 0.63 | 0.013  | 0.002 | 1.45E-09  | 0.007  | 0.008 | 3.40E-01 |
| TG | rs1351394   | T | 0.49 | -0.013 | 0.002 | 5.02E-11  | -0.022 | 0.008 | 6.30E-03 |
| TG | rs139386986 | C | 0.91 | 0.022  | 0.004 | 1.62E-09  | 0.009  | 0.014 | 5.30E-01 |
| TG | rs35104374  | T | 0.27 | 0.016  | 0.002 | 3.72E-12  | 0.004  | 0.009 | 5.80E-01 |
| TG | rs35763453  | T | 0.94 | -0.028 | 0.004 | 9.10E-11  | -0.015 | 0.017 | 2.80E-01 |
| TG | rs35764600  | G | 0.60 | -0.013 | 0.002 | 1.74E-10  | 0.008  | 0.008 | 3.50E-01 |
| TG | rs4760254   | G | 0.76 | 0.028  | 0.002 | 2.90E-33  | 0.006  | 0.009 | 4.90E-01 |
| TG | rs4761234   | T | 0.52 | 0.014  | 0.002 | 4.07E-12  | -0.007 | 0.008 | 3.60E-01 |
| TG | rs4930724   | T | 0.67 | 0.026  | 0.002 | 3.66E-35  | 0.023  | 0.008 | 6.80E-03 |
| TG | rs580063    | T | 0.79 | 0.022  | 0.002 | 2.89E-19  | 0.010  | 0.010 | 3.50E-01 |
| TG | rs67981690  | A | 0.87 | -0.030 | 0.003 | 1.99E-23  | -0.005 | 0.012 | 5.30E-01 |
| TG | rs7134375   | C | 0.57 | 0.017  | 0.002 | 1.18E-17  | 0.018  | 0.008 | 1.70E-02 |
| TG | rs7136223   | A | 0.72 | 0.013  | 0.002 | 1.81E-08  | 0.006  | 0.009 | 5.60E-01 |
| TG | rs7138037   | G | 0.77 | -0.019 | 0.002 | 4.93E-16  | 0.002  | 0.009 | 9.40E-01 |
| TG | rs76895963  | T | 0.98 | 0.087  | 0.008 | 8.11E-30  | 0.112  | 0.030 | 1.70E-04 |
| TG | rs775633    | T | 0.35 | 0.013  | 0.002 | 2.80E-09  | 0.015  | 0.008 | 7.40E-02 |
| TG | rs863750    | C | 0.40 | -0.029 | 0.002 | 2.04E-45  | -0.014 | 0.008 | 6.60E-02 |
| TG | rs9788220   | T | 0.19 | -0.016 | 0.003 | 9.78E-10  | 0.028  | 0.010 | 4.60E-03 |
| TG | rs9943778   | A | 0.76 | 0.015  | 0.002 | 7.91E-11  | 0.001  | 0.009 | 7.90E-01 |
| TG | rs1340819   | A | 0.65 | 0.012  | 0.002 | 4.35E-09  | -0.011 | 0.008 | 2.60E-01 |
| TG | rs149778057 | A | 0.67 | 0.016  | 0.002 | 2.54E-12  | 0.019  | 0.009 | 1.10E-02 |

|    |             |   |      |        |       |           |        |       |          |
|----|-------------|---|------|--------|-------|-----------|--------|-------|----------|
| TG | rs1556124   | G | 0.23 | -0.013 | 0.002 | 2.41E-08  | -0.014 | 0.009 | 4.90E-02 |
| TG | rs2774430   | A | 0.44 | -0.011 | 0.002 | 3.53E-08  | -0.011 | 0.008 | 1.60E-01 |
| TG | rs2812208   | G | 0.98 | 0.049  | 0.007 | 2.40E-12  | 0.035  | 0.026 | 1.30E-01 |
| TG | rs7140110   | T | 0.70 | -0.028 | 0.002 | 5.67E-38  | -0.005 | 0.008 | 4.40E-01 |
| TG | rs7400002   | A | 0.77 | -0.014 | 0.002 | 6.07E-09  | 0.003  | 0.009 | 6.10E-01 |
| TG | rs79192570  | G | 0.86 | 0.025  | 0.003 | 1.02E-18  | 0.003  | 0.011 | 8.10E-01 |
| TG | rs9553567   | T | 0.16 | -0.015 | 0.003 | 2.79E-08  | -0.001 | 0.011 | 8.70E-01 |
| TG | rs9561643   | A | 0.69 | -0.017 | 0.002 | 1.48E-14  | 0.023  | 0.008 | 3.60E-03 |
| TG | rs9584870   | T | 0.63 | 0.012  | 0.002 | 7.81E-09  | 0.019  | 0.008 | 2.20E-02 |
| TG | rs9600143   | A | 0.46 | 0.013  | 0.002 | 5.77E-10  | -0.008 | 0.008 | 3.20E-01 |
| TG | rs12880341  | T | 0.84 | -0.021 | 0.003 | 2.95E-14  | 0.004  | 0.011 | 7.00E-01 |
| TG | rs2070341   | C | 0.40 | -0.011 | 0.002 | 3.77E-08  | -0.010 | 0.008 | 2.10E-01 |
| TG | rs2240533   | T | 0.69 | 0.013  | 0.002 | 2.68E-09  | 0.020  | 0.008 | 9.00E-03 |
| TG | rs56902258  | T | 0.80 | 0.015  | 0.003 | 2.08E-09  | 0.012  | 0.010 | 3.20E-01 |
| TG | rs61975915  | C | 0.70 | 0.012  | 0.002 | 3.77E-08  | -0.003 | 0.009 | 7.90E-01 |
| TG | rs61993685  | T | 0.92 | 0.023  | 0.004 | 3.63E-10  | 0.020  | 0.014 | 1.50E-01 |
| TG | rs6572807   | A | 0.73 | -0.013 | 0.002 | 2.85E-08  | -0.005 | 0.009 | 4.20E-01 |
| TG | rs10152471  | G | 0.61 | 0.013  | 0.002 | 4.92E-11  | -0.010 | 0.008 | 1.90E-01 |
| TG | rs1077835   | A | 0.78 | -0.047 | 0.002 | 3.42E-86  | 0.009  | 0.009 | 3.30E-01 |
| TG | rs11635675  | T | 0.66 | -0.024 | 0.002 | 4.19E-31  | 0.015  | 0.008 | 7.40E-02 |
| TG | rs12440800  | A | 0.74 | -0.016 | 0.002 | 1.96E-12  | -0.009 | 0.009 | 4.10E-01 |
| TG | rs12591786  | C | 0.84 | 0.018  | 0.003 | 1.65E-10  | 0.002  | 0.011 | 9.90E-01 |
| TG | rs138751626 | A | 0.92 | -0.028 | 0.004 | 3.86E-14  | -0.021 | 0.015 | 1.40E-01 |
| TG | rs139974673 | T | 0.97 | -0.143 | 0.006 | 2.21E-115 | -0.037 | 0.025 | 1.40E-01 |
| TG | rs1532085   | A | 0.39 | 0.031  | 0.002 | 3.18E-51  | -0.013 | 0.008 | 8.90E-02 |
| TG | rs2017500   | G | 0.49 | -0.011 | 0.002 | 1.85E-08  | -0.003 | 0.008 | 8.70E-01 |
| TG | rs28624578  | T | 0.83 | -0.015 | 0.003 | 1.91E-08  | -0.010 | 0.010 | 2.40E-01 |
| TG | rs34245505  | C | 0.80 | -0.016 | 0.003 | 4.71E-10  | -0.003 | 0.010 | 9.10E-01 |
| TG | rs3784310   | T | 0.72 | 0.013  | 0.002 | 4.26E-09  | -0.001 | 0.009 | 9.60E-01 |
| TG | rs3826043   | C | 0.57 | 0.012  | 0.002 | 1.75E-09  | 0.020  | 0.008 | 4.80E-03 |
| TG | rs8025505   | C | 0.74 | -0.017 | 0.002 | 4.02E-14  | 0.002  | 0.009 | 7.80E-01 |
| TG | rs9944241   | T | 0.52 | 0.012  | 0.002 | 2.23E-09  | 0.000  | 0.008 | 8.80E-01 |
| TG | rs12446515  | C | 0.68 | 0.033  | 0.002 | 3.77E-55  | -0.005 | 0.008 | 5.40E-01 |
| TG | rs12600110  | T | 0.62 | 0.015  | 0.002 | 9.29E-13  | -0.011 | 0.008 | 1.20E-01 |
| TG | rs12926107  | A | 0.55 | -0.013 | 0.002 | 1.38E-10  | -0.009 | 0.008 | 2.00E-01 |
| TG | rs12928099  | C | 0.70 | 0.028  | 0.002 | 9.63E-38  | 0.015  | 0.008 | 9.80E-02 |
| TG | rs143076454 | G | 0.98 | -0.040 | 0.007 | 4.26E-08  | -0.007 | 0.028 | 8.50E-01 |
| TG | rs1728407   | A | 0.55 | -0.012 | 0.002 | 1.01E-08  | -0.002 | 0.008 | 7.90E-01 |
| TG | rs200293726 | A | 0.69 | -0.013 | 0.002 | 3.11E-09  | -0.013 | 0.008 | 1.00E-01 |
| TG | rs2288004   | G | 0.62 | 0.015  | 0.002 | 7.35E-13  | 0.001  | 0.008 | 8.50E-01 |
| TG | rs28577186  | G | 0.34 | 0.016  | 0.002 | 4.10E-14  | 0.017  | 0.008 | 4.80E-02 |
| TG | rs2917677   | C | 0.59 | 0.019  | 0.002 | 2.61E-20  | 0.014  | 0.008 | 7.40E-02 |
| TG | rs2925979   | T | 0.30 | 0.032  | 0.002 | 1.42E-49  | 0.019  | 0.008 | 2.20E-02 |
| TG | rs3794695   | C | 0.81 | -0.028 | 0.003 | 1.13E-27  | -0.009 | 0.010 | 4.90E-01 |
| TG | rs3814883   | C | 0.52 | -0.015 | 0.002 | 1.38E-13  | -0.001 | 0.008 | 8.40E-01 |
| TG | rs62064941  | A | 0.96 | 0.029  | 0.005 | 4.20E-08  | 0.033  | 0.020 | 7.40E-02 |
| TG | rs7186635   | A | 0.68 | -0.012 | 0.002 | 3.47E-08  | -0.001 | 0.008 | 6.80E-01 |
| TG | rs7191623   | G | 0.79 | 0.015  | 0.002 | 4.61E-10  | 0.005  | 0.010 | 5.10E-01 |
| TG | rs7199293   | G | 0.47 | -0.011 | 0.002 | 2.02E-08  | -0.007 | 0.008 | 3.20E-01 |
| TG | rs79311290  | A | 0.89 | -0.022 | 0.003 | 7.02E-11  | -0.010 | 0.013 | 4.50E-01 |
| TG | rs933574    | A | 0.52 | -0.012 | 0.002 | 1.72E-09  | 0.014  | 0.008 | 4.20E-02 |
| TG | rs10775406  | A | 0.24 | -0.020 | 0.002 | 1.62E-18  | -0.008 | 0.009 | 3.90E-01 |
| TG | rs11078597  | T | 0.81 | -0.019 | 0.003 | 1.01E-13  | 0.015  | 0.010 | 1.10E-01 |
| TG | rs11078696  | G | 0.20 | 0.017  | 0.003 | 3.35E-11  | 0.029  | 0.010 | 6.80E-03 |
| TG | rs112162280 | C | 0.71 | 0.012  | 0.002 | 2.25E-08  | 0.015  | 0.009 | 6.20E-02 |
| TG | rs11657201  | A | 0.76 | -0.013 | 0.002 | 2.40E-08  | 0.001  | 0.009 | 8.70E-01 |

|    |             |   |      |        |       |           |        |       |          |
|----|-------------|---|------|--------|-------|-----------|--------|-------|----------|
| TG | rs116878033 | C | 0.96 | -0.043 | 0.005 | 1.12E-15  | -0.014 | 0.021 | 3.90E-01 |
| TG | rs12185242  | A | 0.55 | -0.017 | 0.002 | 4.03E-18  | -0.005 | 0.008 | 6.50E-01 |
| TG | rs1292065   | C | 0.29 | 0.014  | 0.002 | 2.99E-10  | -0.003 | 0.009 | 9.20E-01 |
| TG | rs1801689   | A | 0.97 | 0.066  | 0.006 | 2.33E-30  | -0.109 | 0.023 | 9.40E-07 |
| TG | rs4559942   | G | 0.23 | -0.014 | 0.002 | 1.19E-08  | -0.024 | 0.009 | 1.30E-02 |
| TG | rs4969179   | T | 0.40 | 0.018  | 0.002 | 2.73E-18  | 0.020  | 0.008 | 7.40E-03 |
| TG | rs595767    | A | 0.48 | -0.014 | 0.002 | 1.09E-11  | -0.003 | 0.008 | 5.90E-01 |
| TG | rs62084237  | G | 0.82 | -0.024 | 0.003 | 2.91E-20  | -0.006 | 0.010 | 6.10E-01 |
| TG | rs7215055   | A | 0.94 | -0.039 | 0.004 | 1.50E-21  | 0.010  | 0.016 | 5.20E-01 |
| TG | rs72836561  | C | 0.97 | -0.137 | 0.006 | 2.03E-126 | -0.012 | 0.022 | 6.10E-01 |
| TG | rs77244849  | T | 0.68 | 0.015  | 0.002 | 1.45E-11  | 0.018  | 0.008 | 4.40E-02 |
| TG | rs8066985   | A | 0.48 | 0.013  | 0.002 | 1.73E-10  | -0.003 | 0.008 | 5.70E-01 |
| TG | rs9890200   | A | 0.63 | 0.013  | 0.002 | 1.56E-10  | 0.021  | 0.008 | 8.10E-03 |
| TG | rs11664106  | A | 0.63 | 0.013  | 0.002 | 2.17E-09  | 0.014  | 0.008 | 6.90E-02 |
| TG | rs12454712  | T | 0.62 | 0.012  | 0.002 | 1.55E-09  | 0.016  | 0.008 | 5.70E-02 |
| TG | rs2187114   | G | 0.90 | 0.019  | 0.003 | 2.22E-08  | 0.003  | 0.013 | 7.80E-01 |
| TG | rs41292412  | C | 0.99 | -0.063 | 0.009 | 1.41E-11  | 0.003  | 0.035 | 7.20E-01 |
| TG | rs6506033   | C | 0.93 | 0.023  | 0.004 | 1.20E-09  | 0.014  | 0.015 | 2.30E-01 |
| TG | rs7239575   | T | 0.51 | 0.016  | 0.002 | 4.31E-15  | 0.007  | 0.008 | 4.70E-01 |
| TG | rs867939    | G | 0.42 | 0.014  | 0.002 | 8.75E-12  | 0.009  | 0.008 | 2.40E-01 |
| TG | rs921971    | T | 0.73 | -0.016 | 0.002 | 2.79E-12  | -0.001 | 0.009 | 7.50E-01 |
| TG | rs10422861  | C | 0.33 | 0.019  | 0.002 | 3.23E-20  | 0.010  | 0.008 | 2.30E-01 |
| TG | rs116843064 | G | 0.98 | 0.226  | 0.007 | 3.11E-215 | -0.005 | 0.028 | 8.80E-01 |
| TG | rs12610709  | G | 0.83 | -0.022 | 0.003 | 4.98E-17  | -0.004 | 0.010 | 7.60E-01 |
| TG | rs142385484 | C | 0.85 | 0.023  | 0.003 | 3.15E-16  | 0.022  | 0.011 | 3.60E-02 |
| TG | rs188247550 | C | 0.99 | 0.134  | 0.009 | 1.66E-48  | -0.252 | 0.034 | 3.20E-14 |
| TG | rs2278426   | C | 0.96 | 0.041  | 0.005 | 1.98E-14  | -0.020 | 0.021 | 4.00E-01 |
| TG | rs2860183   | T | 0.38 | 0.014  | 0.002 | 9.19E-12  | 0.016  | 0.008 | 5.50E-02 |
| TG | rs296360    | T | 0.83 | 0.018  | 0.003 | 5.37E-11  | 0.000  | 0.011 | 8.80E-01 |
| TG | rs3890483   | G | 0.56 | -0.020 | 0.002 | 2.09E-22  | -0.022 | 0.008 | 8.20E-04 |
| TG | rs483082    | G | 0.76 | -0.086 | 0.002 | 1.11E-292 | 0.078  | 0.009 | 2.80E-17 |
| TG | rs5112      | C | 0.47 | -0.068 | 0.002 | 6.50E-224 | 0.028  | 0.008 | 8.10E-04 |
| TG | rs55737395  | G | 0.66 | 0.013  | 0.002 | 3.28E-10  | 0.007  | 0.008 | 4.50E-01 |
| TG | rs573377651 | A | 0.92 | -0.023 | 0.004 | 2.47E-10  | 0.002  | 0.014 | 9.10E-01 |
| TG | rs58324296  | A | 0.65 | 0.015  | 0.002 | 8.67E-13  | 0.019  | 0.008 | 2.10E-02 |
| TG | rs58542926  | C | 0.93 | 0.103  | 0.004 | 1.20E-162 | -0.289 | 0.015 | 2.80E-85 |
| TG | rs58895965  | C | 0.83 | -0.027 | 0.003 | 2.17E-24  | 0.018  | 0.010 | 6.30E-02 |
| TG | rs62118471  | T | 0.97 | -0.043 | 0.006 | 5.05E-11  | -0.003 | 0.026 | 8.70E-01 |
| TG | rs7260465   | C | 0.74 | 0.016  | 0.002 | 1.88E-12  | -0.016 | 0.009 | 6.50E-02 |
| TG | rs8102873   | C | 0.42 | -0.012 | 0.002 | 8.84E-10  | 0.003  | 0.008 | 7.70E-01 |
| TG | rs838133    | A | 0.45 | 0.025  | 0.002 | 1.81E-33  | 0.024  | 0.008 | 2.20E-03 |
| TG | rs149142833 | C | 0.84 | -0.017 | 0.003 | 3.22E-10  | -0.046 | 0.011 | 2.40E-05 |
| TG | rs151235402 | C | 0.98 | -0.053 | 0.008 | 8.80E-11  | -0.090 | 0.031 | 3.60E-03 |
| TG | rs1883711   | G | 0.97 | -0.060 | 0.006 | 1.06E-24  | -0.068 | 0.023 | 1.80E-03 |
| TG | rs293561    | T | 0.64 | -0.012 | 0.002 | 2.34E-08  | 0.006  | 0.008 | 4.70E-01 |
| TG | rs55837381  | G | 0.75 | 0.013  | 0.002 | 9.67E-09  | 0.001  | 0.009 | 9.50E-01 |
| TG | rs55966194  | C | 0.72 | 0.018  | 0.002 | 1.48E-15  | -0.002 | 0.009 | 7.80E-01 |
| TG | rs6068280   | A | 0.33 | -0.014 | 0.002 | 6.18E-11  | -0.023 | 0.008 | 3.20E-03 |
| TG | rs6073958   | T | 0.80 | -0.056 | 0.002 | 1.86E-109 | -0.001 | 0.010 | 9.50E-01 |
| TG | rs6093446   | G | 0.71 | -0.015 | 0.002 | 2.24E-11  | -0.003 | 0.009 | 7.50E-01 |
| TG | rs7274718   | G | 0.40 | -0.016 | 0.002 | 6.24E-15  | -0.002 | 0.008 | 9.70E-01 |
| TG | rs8126001   | C | 0.51 | 0.016  | 0.002 | 3.48E-16  | 0.008  | 0.008 | 2.30E-01 |
| TG | rs394872    | C | 0.46 | -0.011 | 0.002 | 1.90E-08  | -0.013 | 0.008 | 9.20E-02 |
| TG | rs6517522   | T | 0.50 | 0.013  | 0.002 | 9.83E-11  | 0.007  | 0.008 | 3.60E-01 |
| TG | rs134551    | C | 0.66 | 0.012  | 0.002 | 3.01E-08  | -0.003 | 0.008 | 8.30E-01 |
| TG | rs140288    | G | 0.43 | 0.013  | 0.002 | 3.69E-11  | -0.014 | 0.008 | 8.10E-02 |

|     |            |   |      |        |       |          |        |       |          |
|-----|------------|---|------|--------|-------|----------|--------|-------|----------|
| TG  | rs2071887  | T | 0.66 | -0.016 | 0.002 | 2.41E-14 | -0.006 | 0.008 | 4.60E-01 |
| TG  | rs2267373  | C | 0.42 | -0.022 | 0.002 | 1.89E-26 | -0.001 | 0.008 | 7.80E-01 |
| TG  | rs60610697 | T | 0.78 | -0.018 | 0.002 | 2.05E-13 | -0.002 | 0.009 | 6.50E-01 |
| TG  | rs9610329  | C | 0.57 | -0.014 | 0.002 | 1.76E-11 | -0.025 | 0.008 | 1.30E-03 |
| WHR | rs10158345 | C | 0.70 | 0.012  | 0.002 | 7.37E-10 | -0.001 | 0.009 | 9.40E-01 |
| WHR | rs10919388 | A | 0.27 | -0.027 | 0.002 | 1.56E-44 | 0.000  | 0.009 | 9.30E-01 |
| WHR | rs10923724 | T | 0.56 | 0.024  | 0.002 | 2.96E-45 | 0.000  | 0.008 | 9.70E-01 |
| WHR | rs11162968 | T | 0.68 | -0.011 | 0.002 | 9.65E-09 | -0.011 | 0.008 | 1.60E-01 |
| WHR | rs11208660 | T | 0.07 | 0.023  | 0.003 | 1.77E-14 | 0.004  | 0.014 | 8.50E-01 |
| WHR | rs11577194 | T | 0.50 | 0.009  | 0.002 | 3.21E-08 | 0.017  | 0.008 | 4.60E-02 |
| WHR | rs12024554 | T | 0.23 | -0.015 | 0.002 | 9.28E-11 | -0.004 | 0.009 | 6.70E-01 |
| WHR | rs12042959 | A | 0.86 | 0.016  | 0.003 | 5.65E-10 | 0.005  | 0.011 | 7.60E-01 |
| WHR | rs12048743 | C | 0.55 | -0.013 | 0.002 | 5.11E-13 | -0.007 | 0.008 | 3.30E-01 |
| WHR | rs12140153 | T | 0.09 | -0.021 | 0.004 | 9.70E-10 | -0.006 | 0.013 | 6.10E-01 |
| WHR | rs1289021  | C | 0.43 | 0.011  | 0.002 | 2.40E-10 | 0.010  | 0.008 | 2.70E-01 |
| WHR | rs1563355  | T | 0.33 | -0.028 | 0.002 | 3.82E-48 | -0.019 | 0.008 | 3.30E-02 |
| WHR | rs17015701 | A | 0.21 | 0.012  | 0.002 | 6.27E-09 | 0.005  | 0.010 | 4.80E-01 |
| WHR | rs17185933 | A | 0.17 | 0.014  | 0.002 | 5.93E-11 | 0.007  | 0.010 | 5.20E-01 |
| WHR | rs1884454  | T | 0.27 | -0.011 | 0.002 | 5.68E-08 | 0.004  | 0.009 | 7.10E-01 |
| WHR | rs1891216  | T | 0.63 | -0.010 | 0.002 | 7.57E-09 | -0.002 | 0.008 | 7.70E-01 |
| WHR | rs2061708  | C | 0.59 | 0.015  | 0.002 | 2.96E-14 | -0.012 | 0.008 | 1.30E-01 |
| WHR | rs213020   | A | 0.31 | -0.012 | 0.002 | 4.71E-09 | -0.009 | 0.008 | 3.10E-01 |
| WHR | rs213637   | T | 0.53 | 0.013  | 0.002 | 3.80E-12 | 0.009  | 0.008 | 2.30E-01 |
| WHR | rs2235529  | T | 0.16 | -0.014 | 0.002 | 1.14E-08 | -0.007 | 0.011 | 6.00E-01 |
| WHR | rs2298632  | T | 0.49 | -0.014 | 0.002 | 2.44E-17 | -0.014 | 0.008 | 2.70E-02 |
| WHR | rs2301453  | A | 0.55 | -0.022 | 0.002 | 1.20E-39 | -0.018 | 0.008 | 1.40E-02 |
| WHR | rs2335077  | A | 0.64 | -0.012 | 0.002 | 1.91E-10 | -0.013 | 0.008 | 1.40E-01 |
| WHR | rs2742690  | A | 0.20 | 0.017  | 0.003 | 1.82E-11 | -0.012 | 0.010 | 2.50E-01 |
| WHR | rs2791556  | T | 0.71 | -0.014 | 0.002 | 8.19E-13 | -0.017 | 0.009 | 6.30E-02 |
| WHR | rs2815749  | A | 0.18 | -0.017 | 0.002 | 2.68E-15 | -0.005 | 0.010 | 6.50E-01 |
| WHR | rs28680958 | A | 0.22 | -0.014 | 0.002 | 4.37E-09 | -0.001 | 0.009 | 8.40E-01 |
| WHR | rs3767848  | A | 0.25 | -0.012 | 0.002 | 3.53E-09 | -0.022 | 0.009 | 1.60E-02 |
| WHR | rs3789615  | T | 0.43 | -0.013 | 0.002 | 5.14E-15 | -0.023 | 0.008 | 3.30E-03 |
| WHR | rs380654   | C | 0.60 | -0.012 | 0.002 | 1.22E-11 | -0.011 | 0.008 | 1.80E-01 |
| WHR | rs4660808  | T | 0.22 | 0.015  | 0.002 | 5.03E-12 | 0.004  | 0.009 | 6.80E-01 |
| WHR | rs543874   | A | 0.78 | -0.020 | 0.002 | 4.18E-22 | -0.002 | 0.010 | 7.90E-01 |
| WHR | rs587271   | T | 0.69 | 0.011  | 0.002 | 2.42E-08 | 0.019  | 0.009 | 3.60E-02 |
| WHR | rs61783470 | A | 0.13 | -0.019 | 0.003 | 2.40E-10 | -0.020 | 0.012 | 1.50E-01 |
| WHR | rs61813324 | T | 0.13 | 0.019  | 0.003 | 7.16E-11 | 0.007  | 0.012 | 6.30E-01 |
| WHR | rs6658424  | A | 0.28 | -0.013 | 0.002 | 4.74E-11 | -0.008 | 0.009 | 4.50E-01 |
| WHR | rs6658723  | T | 0.43 | 0.015  | 0.002 | 4.17E-13 | -0.005 | 0.008 | 3.80E-01 |
| WHR | rs6688233  | T | 0.24 | 0.019  | 0.002 | 8.21E-19 | 0.022  | 0.009 | 1.80E-02 |
| WHR | rs6699397  | A | 0.62 | -0.012 | 0.002 | 3.89E-12 | -0.008 | 0.008 | 3.50E-01 |
| WHR | rs7528123  | T | 0.62 | -0.010 | 0.002 | 1.05E-08 | 0.000  | 0.008 | 9.00E-01 |
| WHR | rs7531656  | A | 0.33 | 0.016  | 0.002 | 1.36E-19 | 0.014  | 0.008 | 8.30E-02 |
| WHR | rs754984   | C | 0.93 | -0.020 | 0.004 | 1.54E-08 | -0.003 | 0.015 | 8.40E-01 |
| WHR | rs785505   | A | 0.95 | 0.024  | 0.004 | 1.10E-08 | 0.039  | 0.018 | 2.10E-02 |
| WHR | rs905938   | T | 0.72 | 0.013  | 0.002 | 3.32E-11 | 0.014  | 0.009 | 6.10E-02 |
| WHR | rs9659380  | A | 0.84 | -0.018 | 0.002 | 8.76E-14 | -0.016 | 0.011 | 8.50E-02 |
| WHR | rs10153926 | A | 0.22 | 0.014  | 0.002 | 2.55E-09 | 0.008  | 0.010 | 4.30E-01 |
| WHR | rs1017698  | A | 0.60 | -0.011 | 0.002 | 3.43E-10 | -0.025 | 0.008 | 1.30E-03 |
| WHR | rs10185087 | T | 0.59 | -0.010 | 0.002 | 1.05E-08 | -0.010 | 0.008 | 1.60E-01 |
| WHR | rs10195252 | T | 0.58 | 0.023  | 0.002 | 5.16E-41 | 0.036  | 0.008 | 7.40E-06 |
| WHR | rs1020731  | A | 0.70 | 0.013  | 0.002 | 2.32E-11 | 0.009  | 0.008 | 2.20E-01 |
| WHR | rs10495563 | A | 0.66 | 0.012  | 0.002 | 8.03E-11 | -0.006 | 0.008 | 4.80E-01 |
| WHR | rs1124639  | T | 0.44 | -0.011 | 0.002 | 2.99E-11 | -0.008 | 0.008 | 2.90E-01 |

|     |             |   |      |        |       |          |        |       |          |
|-----|-------------|---|------|--------|-------|----------|--------|-------|----------|
| WHR | rs11677670  | T | 0.18 | -0.018 | 0.002 | 2.77E-14 | -0.014 | 0.010 | 1.60E-01 |
| WHR | rs11688816  | A | 0.48 | -0.009 | 0.002 | 4.49E-08 | -0.007 | 0.008 | 4.00E-01 |
| WHR | rs11897119  | T | 0.59 | -0.013 | 0.002 | 3.21E-15 | 0.000  | 0.008 | 8.20E-01 |
| WHR | rs12466434  | T | 0.55 | 0.010  | 0.002 | 1.05E-08 | 0.000  | 0.008 | 9.30E-01 |
| WHR | rs12469667  | A | 0.23 | -0.013 | 0.002 | 6.00E-10 | -0.005 | 0.009 | 6.50E-01 |
| WHR | rs13028903  | T | 0.46 | 0.011  | 0.002 | 3.43E-10 | -0.006 | 0.008 | 4.30E-01 |
| WHR | rs13391573  | T | 0.18 | 0.021  | 0.002 | 1.35E-20 | 0.014  | 0.010 | 1.20E-01 |
| WHR | rs1345203   | T | 0.78 | 0.019  | 0.002 | 6.61E-15 | 0.015  | 0.010 | 1.40E-01 |
| WHR | rs1569135   | A | 0.54 | 0.022  | 0.002 | 1.16E-36 | 0.011  | 0.008 | 1.70E-01 |
| WHR | rs17041868  | T | 0.92 | -0.019 | 0.003 | 1.94E-08 | -0.032 | 0.016 | 4.00E-02 |
| WHR | rs17324331  | C | 0.31 | 0.012  | 0.002 | 2.69E-10 | 0.006  | 0.008 | 4.30E-01 |
| WHR | rs17326656  | T | 0.23 | 0.015  | 0.002 | 3.20E-13 | 0.022  | 0.009 | 1.40E-02 |
| WHR | rs17489259  | A | 0.23 | -0.012 | 0.002 | 1.10E-08 | -0.006 | 0.009 | 4.70E-01 |
| WHR | rs2195086   | T | 0.83 | -0.014 | 0.002 | 1.97E-09 | -0.007 | 0.011 | 4.50E-01 |
| WHR | rs2373078   | T | 0.10 | 0.016  | 0.003 | 5.09E-08 | -0.004 | 0.013 | 7.20E-01 |
| WHR | rs2384463   | A | 0.48 | 0.011  | 0.002 | 2.77E-09 | 0.029  | 0.008 | 4.10E-04 |
| WHR | rs2709373   | T | 0.82 | 0.013  | 0.002 | 4.30E-08 | -0.007 | 0.010 | 5.70E-01 |
| WHR | rs332105    | A | 0.55 | -0.014 | 0.002 | 1.14E-14 | -0.006 | 0.008 | 3.80E-01 |
| WHR | rs3891424   | A | 0.05 | -0.028 | 0.004 | 2.65E-10 | 0.007  | 0.017 | 6.70E-01 |
| WHR | rs399984    | C | 0.78 | 0.013  | 0.002 | 4.53E-09 | -0.001 | 0.009 | 9.40E-01 |
| WHR | rs4366921   | C | 0.30 | -0.012 | 0.002 | 8.32E-09 | 0.000  | 0.008 | 9.90E-01 |
| WHR | rs4668304   | A | 0.36 | 0.011  | 0.002 | 3.27E-08 | 0.020  | 0.008 | 1.30E-02 |
| WHR | rs4671358   | A | 0.60 | 0.011  | 0.002 | 5.43E-09 | 0.017  | 0.008 | 2.40E-02 |
| WHR | rs4671796   | A | 0.55 | 0.011  | 0.002 | 6.97E-10 | -0.003 | 0.008 | 9.20E-01 |
| WHR | rs4673616   | T | 0.64 | -0.012 | 0.002 | 1.45E-09 | -0.017 | 0.009 | 3.70E-02 |
| WHR | rs4849294   | T | 0.61 | 0.012  | 0.002 | 5.62E-12 | -0.007 | 0.008 | 2.80E-01 |
| WHR | rs4851057   | T | 0.13 | 0.016  | 0.003 | 4.86E-09 | 0.031  | 0.012 | 8.90E-03 |
| WHR | rs4851283   | C | 0.31 | 0.016  | 0.002 | 5.74E-15 | 0.018  | 0.008 | 1.40E-02 |
| WHR | rs55920843  | T | 0.99 | 0.062  | 0.009 | 1.27E-11 | 0.046  | 0.036 | 2.40E-01 |
| WHR | rs62106258  | T | 0.95 | 0.043  | 0.005 | 3.92E-21 | 0.043  | 0.018 | 2.00E-02 |
| WHR | rs6430168   | T | 0.21 | 0.012  | 0.002 | 2.26E-08 | 0.003  | 0.010 | 8.70E-01 |
| WHR | rs6433219   | A | 0.27 | 0.014  | 0.002 | 1.05E-11 | 0.005  | 0.009 | 7.10E-01 |
| WHR | rs6545714   | A | 0.61 | -0.014 | 0.002 | 2.92E-16 | 0.009  | 0.008 | 3.30E-01 |
| WHR | rs6743060   | A | 0.84 | 0.027  | 0.002 | 1.18E-33 | -0.004 | 0.010 | 7.20E-01 |
| WHR | rs6749646   | A | 0.78 | -0.021 | 0.002 | 1.36E-21 | 0.000  | 0.009 | 9.00E-01 |
| WHR | rs711869    | A | 0.56 | -0.017 | 0.002 | 2.10E-21 | -0.001 | 0.008 | 9.60E-01 |
| WHR | rs7561798   | A | 0.53 | -0.010 | 0.002 | 1.16E-08 | -0.023 | 0.008 | 3.60E-03 |
| WHR | rs7587522   | C | 0.35 | -0.011 | 0.002 | 2.77E-09 | 0.001  | 0.008 | 9.00E-01 |
| WHR | rs7591387   | T | 0.10 | 0.018  | 0.003 | 1.63E-10 | 0.002  | 0.012 | 9.00E-01 |
| WHR | rs7598832   | T | 0.33 | -0.019 | 0.002 | 8.64E-26 | 0.008  | 0.008 | 3.70E-01 |
| WHR | rs7599312   | A | 0.27 | -0.011 | 0.002 | 1.97E-09 | 0.003  | 0.009 | 6.10E-01 |
| WHR | rs843460    | A | 0.67 | -0.012 | 0.002 | 1.46E-08 | -0.011 | 0.008 | 2.00E-01 |
| WHR | rs929641    | A | 0.59 | 0.013  | 0.002 | 7.98E-14 | 0.011  | 0.008 | 1.60E-01 |
| WHR | rs930653    | A | 0.36 | 0.011  | 0.002 | 1.31E-08 | 0.007  | 0.008 | 4.10E-01 |
| WHR | rs9630986   | C | 0.67 | 0.012  | 0.002 | 1.35E-10 | 0.021  | 0.008 | 5.00E-03 |
| WHR | rs10049088  | T | 0.38 | -0.027 | 0.002 | 3.17E-51 | 0.008  | 0.008 | 2.70E-01 |
| WHR | rs10490869  | A | 0.80 | -0.018 | 0.002 | 8.93E-17 | -0.018 | 0.010 | 1.00E-01 |
| WHR | rs112551697 | A | 0.03 | 0.032  | 0.006 | 2.19E-08 | 0.049  | 0.022 | 3.60E-02 |
| WHR | rs115934382 | A | 0.92 | 0.023  | 0.004 | 2.00E-10 | 0.015  | 0.014 | 3.40E-01 |
| WHR | rs11705729  | A | 0.68 | -0.011 | 0.002 | 2.42E-08 | -0.002 | 0.008 | 6.90E-01 |
| WHR | rs11718898  | T | 0.32 | 0.014  | 0.002 | 5.57E-13 | 0.020  | 0.008 | 1.50E-02 |
| WHR | rs11917047  | A | 0.76 | -0.012 | 0.002 | 2.53E-08 | -0.006 | 0.009 | 4.60E-01 |
| WHR | rs12495178  | T | 0.64 | 0.012  | 0.002 | 5.62E-12 | 0.014  | 0.008 | 8.40E-02 |
| WHR | rs12631066  | C | 0.22 | 0.012  | 0.002 | 3.53E-09 | 0.006  | 0.009 | 5.60E-01 |
| WHR | rs1286769   | A | 0.46 | -0.010 | 0.002 | 2.29E-08 | -0.005 | 0.008 | 5.40E-01 |
| WHR | rs13063979  | T | 0.73 | -0.014 | 0.002 | 1.20E-12 | -0.014 | 0.009 | 1.10E-01 |

|     |            |   |      |        |       |          |        |       |          |
|-----|------------|---|------|--------|-------|----------|--------|-------|----------|
| WHR | rs13080520 | T | 0.64 | -0.011 | 0.002 | 2.77E-09 | -0.016 | 0.008 | 5.80E-02 |
| WHR | rs13095863 | T | 0.33 | -0.011 | 0.002 | 1.79E-08 | -0.028 | 0.008 | 6.20E-04 |
| WHR | rs13316065 | T | 0.32 | 0.017  | 0.002 | 3.57E-21 | 0.029  | 0.008 | 2.20E-04 |
| WHR | rs1452075  | T | 0.73 | 0.012  | 0.002 | 9.56E-11 | 0.026  | 0.009 | 3.20E-03 |
| WHR | rs155524   | A | 0.59 | 0.013  | 0.002 | 9.74E-14 | 0.006  | 0.008 | 5.30E-01 |
| WHR | rs1672936  | A | 0.46 | 0.012  | 0.002 | 6.63E-09 | 0.006  | 0.008 | 3.70E-01 |
| WHR | rs16853606 | A | 0.84 | -0.013 | 0.002 | 9.52E-09 | 0.001  | 0.011 | 9.50E-01 |
| WHR | rs17289049 | A | 0.91 | -0.016 | 0.003 | 4.59E-08 | -0.005 | 0.014 | 7.40E-01 |
| WHR | rs2242116  | A | 0.38 | -0.013 | 0.002 | 1.72E-12 | -0.018 | 0.008 | 2.80E-02 |
| WHR | rs2371767  | C | 0.27 | -0.029 | 0.002 | 6.00E-53 | -0.009 | 0.009 | 3.30E-01 |
| WHR | rs2455848  | T | 0.31 | 0.013  | 0.002 | 1.15E-12 | 0.017  | 0.008 | 4.80E-02 |
| WHR | rs2590440  | A | 0.78 | -0.014 | 0.002 | 4.75E-10 | -0.024 | 0.010 | 1.70E-02 |
| WHR | rs2606737  | A | 0.18 | 0.015  | 0.002 | 5.20E-11 | 0.014  | 0.010 | 1.80E-01 |
| WHR | rs310761   | A | 0.10 | 0.020  | 0.003 | 9.29E-10 | 0.007  | 0.013 | 4.50E-01 |
| WHR | rs4320054  | A | 0.59 | -0.013 | 0.002 | 2.93E-11 | -0.012 | 0.008 | 1.40E-01 |
| WHR | rs4635727  | A | 0.72 | 0.012  | 0.002 | 3.64E-09 | 0.012  | 0.009 | 2.70E-01 |
| WHR | rs4686340  | A | 0.25 | 0.012  | 0.002 | 7.75E-10 | 0.006  | 0.009 | 5.10E-01 |
| WHR | rs4894803  | A | 0.60 | 0.015  | 0.002 | 1.25E-16 | -0.007 | 0.008 | 4.60E-01 |
| WHR | rs56133301 | A | 0.01 | -0.057 | 0.009 | 1.57E-11 | -0.013 | 0.034 | 8.10E-01 |
| WHR | rs56853116 | A | 0.71 | -0.013 | 0.002 | 1.33E-08 | -0.007 | 0.009 | 3.20E-01 |
| WHR | rs6442644  | T | 0.70 | -0.011 | 0.002 | 3.75E-09 | 0.007  | 0.008 | 3.00E-01 |
| WHR | rs645040   | T | 0.77 | 0.016  | 0.002 | 6.19E-15 | 0.013  | 0.009 | 1.90E-01 |
| WHR | rs6548834  | A | 0.36 | 0.012  | 0.002 | 5.54E-11 | -0.008 | 0.008 | 3.10E-01 |
| WHR | rs6794936  | A | 0.48 | -0.010 | 0.002 | 5.76E-09 | -0.011 | 0.008 | 2.20E-01 |
| WHR | rs6795831  | A | 0.81 | 0.029  | 0.002 | 5.68E-36 | -0.005 | 0.010 | 5.90E-01 |
| WHR | rs6800707  | C | 0.18 | -0.019 | 0.002 | 4.28E-16 | 0.001  | 0.010 | 8.60E-01 |
| WHR | rs68190114 | A | 0.07 | -0.022 | 0.004 | 1.96E-08 | -0.005 | 0.016 | 8.40E-01 |
| WHR | rs72628504 | A | 0.93 | -0.033 | 0.004 | 2.25E-15 | -0.045 | 0.016 | 6.70E-03 |
| WHR | rs74388175 | T | 0.21 | -0.013 | 0.003 | 8.32E-08 | -0.015 | 0.010 | 1.30E-01 |
| WHR | rs7647305  | T | 0.21 | -0.014 | 0.002 | 1.36E-11 | 0.019  | 0.009 | 2.30E-02 |
| WHR | rs793456   | A | 0.60 | -0.011 | 0.002 | 3.89E-09 | 0.002  | 0.008 | 7.00E-01 |
| WHR | rs9859117  | C | 0.19 | 0.012  | 0.002 | 2.93E-08 | 0.028  | 0.010 | 2.30E-03 |
| WHR | rs9872031  | A | 0.43 | 0.020  | 0.002 | 3.17E-29 | 0.011  | 0.008 | 1.10E-01 |
| WHR | rs9942009  | T | 0.38 | 0.013  | 0.002 | 2.56E-12 | 0.006  | 0.008 | 4.60E-01 |
| WHR | rs998749   | A | 0.50 | 0.013  | 0.002 | 2.06E-14 | 0.008  | 0.008 | 2.30E-01 |
| WHR | rs10004900 | T | 0.87 | -0.017 | 0.003 | 9.85E-09 | -0.011 | 0.012 | 3.90E-01 |
| WHR | rs10019888 | A | 0.81 | -0.021 | 0.002 | 1.52E-19 | -0.020 | 0.011 | 3.90E-02 |
| WHR | rs11133377 | A | 0.72 | 0.014  | 0.002 | 8.68E-13 | 0.008  | 0.009 | 3.30E-01 |
| WHR | rs11724804 | A | 0.44 | -0.017 | 0.002 | 4.88E-20 | -0.008 | 0.008 | 2.30E-01 |
| WHR | rs11726981 | A | 0.72 | -0.011 | 0.002 | 1.20E-08 | -0.004 | 0.009 | 7.40E-01 |
| WHR | rs12643960 | A | 0.85 | -0.017 | 0.003 | 9.89E-10 | -0.008 | 0.011 | 4.20E-01 |
| WHR | rs13130484 | T | 0.43 | 0.015  | 0.002 | 5.28E-18 | 0.016  | 0.008 | 4.80E-02 |
| WHR | rs1464454  | A | 0.40 | -0.010 | 0.002 | 7.09E-08 | -0.021 | 0.008 | 8.60E-03 |
| WHR | rs1551795  | T | 0.51 | 0.009  | 0.002 | 3.21E-08 | 0.004  | 0.008 | 6.70E-01 |
| WHR | rs16896261 | A | 0.86 | -0.014 | 0.003 | 1.35E-08 | -0.011 | 0.011 | 2.50E-01 |
| WHR | rs17644283 | A | 0.39 | 0.015  | 0.002 | 2.00E-16 | -0.004 | 0.008 | 5.10E-01 |
| WHR | rs1789882  | A | 0.17 | 0.016  | 0.002 | 3.49E-12 | 0.013  | 0.010 | 2.40E-01 |
| WHR | rs1863652  | A | 0.35 | -0.010 | 0.002 | 5.92E-08 | 0.002  | 0.008 | 8.50E-01 |
| WHR | rs2167750  | T | 0.47 | 0.020  | 0.002 | 2.06E-28 | 0.015  | 0.008 | 3.70E-02 |
| WHR | rs2333496  | T | 0.69 | 0.010  | 0.002 | 7.57E-09 | -0.004 | 0.008 | 8.80E-01 |
| WHR | rs3121419  | T | 0.30 | -0.013 | 0.002 | 1.13E-11 | 0.003  | 0.008 | 7.50E-01 |
| WHR | rs3804381  | A | 0.27 | 0.012  | 0.002 | 5.65E-10 | 0.008  | 0.009 | 4.00E-01 |
| WHR | rs414865   | A | 0.68 | 0.011  | 0.002 | 9.65E-09 | -0.008 | 0.009 | 3.70E-01 |
| WHR | rs4450871  | A | 0.55 | 0.011  | 0.002 | 1.31E-08 | 0.014  | 0.008 | 1.30E-01 |
| WHR | rs4586926  | A | 0.64 | 0.011  | 0.002 | 3.89E-09 | 0.015  | 0.008 | 3.40E-02 |
| WHR | rs56185013 | A | 0.22 | -0.013 | 0.002 | 6.07E-08 | 0.008  | 0.009 | 5.30E-01 |



|     |             |   |      |        |       |          |        |       |          |
|-----|-------------|---|------|--------|-------|----------|--------|-------|----------|
| WHR | rs7680787   | T | 0.65 | 0.010  | 0.002 | 7.09E-08 | 0.004  | 0.008 | 6.60E-01 |
| WHR | rs789351    | T | 0.42 | 0.012  | 0.002 | 4.65E-13 | 0.000  | 0.008 | 1.00E+00 |
| WHR | rs809955    | A | 0.37 | -0.016 | 0.002 | 9.19E-15 | -0.013 | 0.008 | 1.00E-01 |
| WHR | rs10475249  | C | 0.55 | 0.013  | 0.002 | 2.08E-11 | 0.008  | 0.008 | 2.50E-01 |
| WHR | rs10477191  | A | 0.94 | -0.028 | 0.004 | 3.06E-12 | 0.002  | 0.019 | 9.80E-01 |
| WHR | rs11167753  | T | 0.73 | -0.011 | 0.002 | 1.20E-08 | -0.007 | 0.009 | 3.50E-01 |
| WHR | rs1122080   | A | 0.20 | -0.013 | 0.002 | 2.61E-09 | 0.023  | 0.010 | 2.30E-02 |
| WHR | rs11747001  | A | 0.76 | 0.015  | 0.002 | 1.36E-14 | 0.019  | 0.009 | 3.20E-02 |
| WHR | rs11956399  | T | 0.19 | 0.016  | 0.002 | 6.88E-13 | 0.021  | 0.010 | 9.00E-02 |
| WHR | rs13163336  | A | 0.17 | 0.018  | 0.003 | 7.59E-12 | 0.023  | 0.011 | 4.30E-02 |
| WHR | rs13179413  | T | 0.28 | 0.016  | 0.002 | 1.87E-15 | 0.022  | 0.009 | 5.80E-03 |
| WHR | rs1382284   | A | 0.49 | 0.010  | 0.002 | 3.80E-08 | -0.010 | 0.008 | 3.30E-01 |
| WHR | rs1382894   | A | 0.65 | 0.011  | 0.002 | 1.97E-09 | 0.020  | 0.008 | 1.40E-02 |
| WHR | rs17152077  | A | 0.13 | -0.014 | 0.003 | 4.25E-08 | -0.002 | 0.011 | 9.70E-01 |
| WHR | rs17568628  | T | 0.95 | -0.026 | 0.004 | 1.97E-09 | -0.020 | 0.018 | 2.90E-01 |
| WHR | rs17738166  | A | 0.40 | 0.011  | 0.002 | 2.40E-10 | 0.003  | 0.008 | 7.20E-01 |
| WHR | rs17764730  | T | 0.24 | -0.011 | 0.002 | 5.68E-08 | 0.009  | 0.009 | 4.00E-01 |
| WHR | rs2112347   | T | 0.63 | 0.015  | 0.002 | 1.11E-18 | 0.016  | 0.008 | 3.60E-02 |
| WHR | rs2161097   | T | 0.44 | 0.013  | 0.002 | 2.56E-12 | 0.014  | 0.008 | 5.00E-02 |
| WHR | rs2448      | T | 0.74 | 0.016  | 0.002 | 2.79E-15 | -0.013 | 0.009 | 1.90E-01 |
| WHR | rs2964006   | T | 0.46 | 0.013  | 0.002 | 8.03E-11 | 0.010  | 0.008 | 1.90E-01 |
| WHR | rs34000     | T | 0.60 | 0.011  | 0.002 | 2.77E-09 | 0.012  | 0.008 | 1.60E-01 |
| WHR | rs4395620   | T | 0.58 | 0.011  | 0.002 | 3.89E-09 | 0.009  | 0.008 | 2.90E-01 |
| WHR | rs4454042   | T | 0.27 | 0.013  | 0.002 | 2.15E-10 | 0.002  | 0.009 | 8.90E-01 |
| WHR | rs459193    | A | 0.25 | 0.024  | 0.002 | 2.76E-36 | -0.014 | 0.009 | 1.60E-01 |
| WHR | rs4868256   | T | 0.50 | 0.011  | 0.002 | 1.31E-08 | 0.013  | 0.008 | 1.10E-01 |
| WHR | rs628763    | T | 0.58 | -0.011 | 0.002 | 2.40E-10 | -0.004 | 0.008 | 6.10E-01 |
| WHR | rs6556301   | T | 0.37 | 0.013  | 0.002 | 3.39E-13 | -0.010 | 0.008 | 2.30E-01 |
| WHR | rs6861681   | A | 0.29 | 0.018  | 0.002 | 1.52E-23 | 0.004  | 0.008 | 4.60E-01 |
| WHR | rs6870983   | T | 0.21 | -0.016 | 0.002 | 9.19E-15 | -0.007 | 0.010 | 4.20E-01 |
| WHR | rs6874848   | A | 0.70 | -0.014 | 0.002 | 5.20E-12 | -0.006 | 0.008 | 5.50E-01 |
| WHR | rs710380    | T | 0.70 | -0.011 | 0.002 | 3.80E-08 | 0.003  | 0.009 | 6.90E-01 |
| WHR | rs72846967  | A | 0.70 | -0.012 | 0.002 | 3.53E-09 | -0.003 | 0.009 | 6.90E-01 |
| WHR | rs7736177   | A | 0.69 | -0.011 | 0.002 | 3.27E-08 | -0.005 | 0.008 | 5.50E-01 |
| WHR | rs888675    | T | 0.39 | -0.011 | 0.002 | 2.42E-08 | 0.003  | 0.008 | 8.60E-01 |
| WHR | rs10499013  | A | 0.28 | -0.013 | 0.002 | 4.10E-10 | -0.008 | 0.009 | 3.10E-01 |
| WHR | rs10806842  | C | 0.50 | 0.011  | 0.002 | 3.80E-08 | 0.008  | 0.008 | 2.90E-01 |
| WHR | rs11154521  | C | 0.32 | -0.010 | 0.002 | 1.46E-08 | -0.014 | 0.008 | 3.90E-02 |
| WHR | rs112266013 | A | 0.14 | -0.017 | 0.003 | 2.46E-09 | -0.012 | 0.011 | 2.70E-01 |
| WHR | rs113315602 | A | 0.91 | -0.027 | 0.004 | 3.37E-14 | -0.013 | 0.014 | 3.00E-01 |
| WHR | rs114760566 | A | 0.04 | 0.067  | 0.005 | 8.67E-45 | 0.050  | 0.019 | 7.30E-03 |
| WHR | rs11752928  | C | 0.49 | -0.011 | 0.002 | 3.27E-08 | -0.020 | 0.008 | 1.10E-02 |
| WHR | rs12527712  | T | 0.09 | 0.028  | 0.003 | 7.56E-18 | 0.000  | 0.015 | 9.20E-01 |
| WHR | rs1294410   | T | 0.38 | -0.025 | 0.002 | 7.89E-48 | 0.004  | 0.008 | 6.10E-01 |
| WHR | rs13191362  | A | 0.86 | 0.015  | 0.003 | 1.25E-08 | 0.008  | 0.012 | 4.80E-01 |
| WHR | rs13198178  | C | 0.06 | 0.021  | 0.004 | 7.30E-09 | 0.024  | 0.016 | 1.40E-01 |
| WHR | rs1334576   | A | 0.43 | -0.016 | 0.002 | 2.26E-19 | -0.011 | 0.008 | 2.00E-01 |
| WHR | rs1411338   | T | 0.34 | -0.011 | 0.002 | 2.72E-09 | -0.014 | 0.008 | 4.30E-02 |
| WHR | rs145244672 | T | 0.88 | -0.025 | 0.003 | 5.77E-13 | -0.004 | 0.013 | 6.90E-01 |
| WHR | rs148967059 | A | 0.20 | 0.018  | 0.003 | 9.44E-12 | 0.011  | 0.010 | 2.70E-01 |
| WHR | rs17078048  | A | 0.85 | -0.014 | 0.003 | 5.33E-08 | -0.003 | 0.011 | 6.50E-01 |
| WHR | rs17448885  | C | 0.65 | 0.011  | 0.002 | 7.06E-09 | 0.002  | 0.008 | 9.70E-01 |
| WHR | rs17681686  | C | 0.30 | 0.015  | 0.002 | 8.10E-16 | 0.005  | 0.008 | 5.00E-01 |
| WHR | rs185320691 | C | 0.10 | 0.027  | 0.004 | 1.48E-13 | 0.006  | 0.014 | 5.80E-01 |
| WHR | rs211476    | T | 0.30 | -0.013 | 0.002 | 2.32E-11 | 0.004  | 0.009 | 7.50E-01 |
| WHR | rs2186059   | C | 0.26 | -0.013 | 0.002 | 4.10E-10 | -0.021 | 0.009 | 2.10E-02 |

|     |             |   |      |        |       |           |        |       |          |
|-----|-------------|---|------|--------|-------|-----------|--------|-------|----------|
| WHR | rs2242416   | A | 0.39 | 0.014  | 0.002 | 2.44E-17  | 0.010  | 0.008 | 1.70E-01 |
| WHR | rs2492419   | A | 0.58 | -0.010 | 0.002 | 1.46E-08  | -0.008 | 0.008 | 2.70E-01 |
| WHR | rs2504706   | T | 0.77 | 0.013  | 0.002 | 3.26E-10  | -0.001 | 0.009 | 7.80E-01 |
| WHR | rs2524137   | T | 0.64 | 0.023  | 0.002 | 4.18E-30  | 0.023  | 0.008 | 4.50E-03 |
| WHR | rs281861363 | A | 0.09 | 0.025  | 0.004 | 8.04E-12  | 0.014  | 0.014 | 2.90E-01 |
| WHR | rs2844455   | T | 0.18 | 0.017  | 0.002 | 7.29E-13  | 0.005  | 0.010 | 6.70E-01 |
| WHR | rs35074855  | C | 0.89 | -0.028 | 0.003 | 2.16E-17  | -0.020 | 0.013 | 8.30E-02 |
| WHR | rs35175534  | A | 0.86 | -0.026 | 0.003 | 1.13E-16  | -0.019 | 0.012 | 1.10E-01 |
| WHR | rs377436    | A | 0.29 | -0.011 | 0.002 | 9.65E-09  | 0.001  | 0.008 | 7.80E-01 |
| WHR | rs534148    | A | 0.56 | 0.014  | 0.002 | 1.05E-11  | 0.021  | 0.008 | 1.30E-02 |
| WHR | rs575147125 | T | 0.84 | -0.024 | 0.003 | 2.09E-14  | -0.028 | 0.012 | 1.70E-02 |
| WHR | rs575662827 | T | 0.90 | -0.029 | 0.004 | 3.99E-16  | -0.011 | 0.014 | 4.40E-01 |
| WHR | rs605066    | T | 0.58 | -0.019 | 0.002 | 1.46E-26  | -0.013 | 0.008 | 7.00E-02 |
| WHR | rs62424543  | A | 0.93 | -0.022 | 0.004 | 1.53E-08  | -0.040 | 0.015 | 9.90E-03 |
| WHR | rs668871    | T | 0.47 | -0.013 | 0.002 | 2.08E-11  | -0.004 | 0.008 | 6.40E-01 |
| WHR | rs672341    | A | 0.41 | -0.012 | 0.002 | 1.06E-09  | -0.008 | 0.008 | 4.80E-01 |
| WHR | rs6933271   | T | 0.99 | -0.067 | 0.008 | 1.47E-16  | -0.083 | 0.037 | 1.80E-02 |
| WHR | rs6940715   | A | 0.89 | 0.016  | 0.003 | 2.32E-08  | -0.002 | 0.013 | 9.90E-01 |
| WHR | rs6941962   | A | 0.16 | 0.024  | 0.003 | 7.84E-20  | 0.014  | 0.011 | 1.90E-01 |
| WHR | rs72959041  | A | 0.04 | 0.126  | 0.004 | 2.37E-180 | 0.038  | 0.018 | 2.30E-02 |
| WHR | rs7744833   | A | 0.68 | 0.013  | 0.002 | 4.74E-11  | 0.008  | 0.008 | 3.50E-01 |
| WHR | rs901630    | T | 0.41 | -0.012 | 0.002 | 2.56E-12  | -0.023 | 0.008 | 2.40E-03 |
| WHR | rs9296938   | A | 0.25 | -0.015 | 0.002 | 4.17E-13  | -0.021 | 0.009 | 3.50E-02 |
| WHR | rs9362083   | A | 0.59 | -0.012 | 0.002 | 8.03E-11  | 0.011  | 0.008 | 2.60E-01 |
| WHR | rs9369425   | A | 0.71 | 0.020  | 0.002 | 1.03E-24  | -0.001 | 0.009 | 8.20E-01 |
| WHR | rs9370243   | T | 0.08 | 0.020  | 0.003 | 6.11E-10  | 0.023  | 0.014 | 8.80E-02 |
| WHR | rs9375417   | T | 0.50 | -0.012 | 0.002 | 1.06E-09  | -0.003 | 0.008 | 6.00E-01 |
| WHR | rs9375478   | A | 0.54 | 0.021  | 0.002 | 2.51E-30  | 0.017  | 0.008 | 5.20E-02 |
| WHR | rs9400239   | T | 0.31 | -0.013 | 0.002 | 9.74E-14  | 0.012  | 0.008 | 1.80E-01 |
| WHR | rs987237    | A | 0.84 | -0.020 | 0.002 | 9.82E-20  | 0.009  | 0.010 | 4.00E-01 |
| WHR | rs998584    | A | 0.48 | 0.035  | 0.002 | 1.04E-94  | 0.018  | 0.008 | 2.20E-02 |
| WHR | rs1011024   | A | 0.83 | 0.015  | 0.002 | 2.89E-11  | 0.041  | 0.011 | 1.40E-04 |
| WHR | rs10269616  | T | 0.56 | -0.011 | 0.002 | 3.80E-08  | 0.001  | 0.008 | 9.20E-01 |
| WHR | rs10269783  | A | 0.41 | 0.010  | 0.002 | 1.63E-08  | 0.017  | 0.008 | 2.20E-02 |
| WHR | rs1142      | T | 0.33 | 0.015  | 0.002 | 1.25E-16  | 0.003  | 0.008 | 7.40E-01 |
| WHR | rs11764879  | A | 0.29 | -0.012 | 0.002 | 7.37E-10  | -0.002 | 0.009 | 9.30E-01 |
| WHR | rs12669521  | A | 0.67 | 0.013  | 0.002 | 1.47E-09  | 0.017  | 0.008 | 3.90E-02 |
| WHR | rs12705971  | T | 0.46 | 0.009  | 0.002 | 6.24E-08  | 0.007  | 0.008 | 3.80E-01 |
| WHR | rs13229637  | T | 0.85 | 0.016  | 0.003 | 2.02E-10  | 0.004  | 0.011 | 7.00E-01 |
| WHR | rs13232789  | T | 0.66 | -0.011 | 0.002 | 7.06E-09  | -0.016 | 0.008 | 4.80E-02 |
| WHR | rs1534696   | A | 0.57 | -0.023 | 0.002 | 2.50E-40  | -0.004 | 0.008 | 5.60E-01 |
| WHR | rs1708302   | T | 0.43 | -0.011 | 0.002 | 2.40E-10  | -0.022 | 0.008 | 7.80E-03 |
| WHR | rs1718618   | A | 0.06 | -0.024 | 0.004 | 2.69E-10  | -0.012 | 0.017 | 3.90E-01 |
| WHR | rs1722123   | T | 0.48 | -0.011 | 0.002 | 1.60E-08  | -0.005 | 0.008 | 4.30E-01 |
| WHR | rs2057869   | A | 0.30 | 0.011  | 0.002 | 2.86E-08  | 0.008  | 0.008 | 3.00E-01 |
| WHR | rs2069443   | T | 0.74 | -0.012 | 0.002 | 1.46E-08  | -0.011 | 0.009 | 2.00E-01 |
| WHR | rs2391168   | A | 0.19 | 0.026  | 0.002 | 3.31E-35  | 0.021  | 0.010 | 3.40E-02 |
| WHR | rs2715135   | T | 0.37 | 0.011  | 0.002 | 1.40E-09  | 0.006  | 0.008 | 4.10E-01 |
| WHR | rs367026    | T | 0.61 | -0.014 | 0.002 | 3.65E-12  | -0.002 | 0.008 | 8.20E-01 |
| WHR | rs3930017   | A | 0.39 | -0.010 | 0.002 | 2.77E-08  | 0.004  | 0.008 | 6.50E-01 |
| WHR | rs39312     | A | 0.62 | -0.015 | 0.002 | 1.17E-17  | -0.002 | 0.008 | 6.20E-01 |
| WHR | rs4476935   | T | 0.43 | -0.011 | 0.002 | 1.97E-09  | -0.004 | 0.008 | 5.20E-01 |
| WHR | rs4718966   | T | 0.41 | 0.010  | 0.002 | 1.46E-08  | 0.018  | 0.008 | 3.70E-02 |
| WHR | rs4727695   | A | 0.90 | 0.022  | 0.003 | 1.23E-13  | 0.016  | 0.013 | 2.40E-01 |
| WHR | rs55747707  | A | 0.18 | -0.015 | 0.002 | 2.15E-11  | 0.002  | 0.010 | 8.80E-01 |
| WHR | rs6942652   | C | 0.43 | -0.013 | 0.002 | 2.56E-12  | -0.015 | 0.008 | 7.30E-02 |

|     |             |   |      |        |       |          |        |       |          |
|-----|-------------|---|------|--------|-------|----------|--------|-------|----------|
| WHR | rs6955431   | T | 0.69 | 0.011  | 0.002 | 1.97E-09 | 0.016  | 0.008 | 8.00E-02 |
| WHR | rs77497827  | A | 0.53 | -0.013 | 0.002 | 1.02E-08 | -0.023 | 0.009 | 6.50E-03 |
| WHR | rs7801581   | T | 0.25 | 0.017  | 0.002 | 6.83E-17 | -0.002 | 0.009 | 6.60E-01 |
| WHR | rs852425    | A | 0.65 | -0.010 | 0.002 | 1.46E-08 | -0.023 | 0.008 | 3.20E-03 |
| WHR | rs10505628  | T | 0.38 | -0.010 | 0.002 | 7.57E-09 | 0.000  | 0.008 | 9.90E-01 |
| WHR | rs11782074  | T | 0.37 | 0.011  | 0.002 | 9.65E-09 | -0.003 | 0.008 | 7.00E-01 |
| WHR | rs11992444  | T | 0.51 | 0.019  | 0.002 | 2.24E-20 | -0.010 | 0.008 | 1.80E-01 |
| WHR | rs13255070  | A | 0.72 | -0.014 | 0.002 | 6.34E-10 | -0.013 | 0.009 | 1.00E-01 |
| WHR | rs13256367  | A | 0.65 | 0.014  | 0.002 | 1.16E-13 | 0.007  | 0.008 | 5.30E-01 |
| WHR | rs1431659   | A | 0.27 | 0.014  | 0.002 | 8.68E-13 | 0.001  | 0.009 | 7.80E-01 |
| WHR | rs144435165 | C | 0.05 | 0.035  | 0.005 | 1.06E-12 | 0.020  | 0.019 | 2.90E-01 |
| WHR | rs1485741   | T | 0.12 | 0.018  | 0.003 | 9.08E-11 | -0.008 | 0.012 | 6.70E-01 |
| WHR | rs15285     | T | 0.26 | -0.012 | 0.002 | 7.37E-10 | -0.006 | 0.009 | 4.40E-01 |
| WHR | rs17446091  | T | 0.79 | -0.012 | 0.002 | 4.35E-08 | -0.023 | 0.010 | 1.30E-02 |
| WHR | rs2012485   | T | 0.05 | -0.025 | 0.004 | 1.98E-08 | -0.008 | 0.019 | 7.50E-01 |
| WHR | rs2725371   | A | 0.30 | 0.017  | 0.002 | 2.60E-16 | 0.005  | 0.008 | 4.60E-01 |
| WHR | rs35708461  | T | 0.22 | 0.014  | 0.002 | 1.86E-08 | 0.006  | 0.009 | 7.00E-01 |
| WHR | rs4145698   | A | 0.66 | 0.011  | 0.002 | 1.31E-08 | -0.005 | 0.008 | 6.70E-01 |
| WHR | rs4738141   | A | 0.74 | -0.020 | 0.002 | 6.53E-26 | -0.015 | 0.009 | 9.80E-02 |
| WHR | rs62505960  | A | 0.91 | 0.020  | 0.004 | 2.14E-08 | 0.007  | 0.014 | 5.80E-01 |
| WHR | rs62506196  | A | 0.84 | -0.016 | 0.003 | 3.89E-09 | 0.001  | 0.011 | 9.40E-01 |
| WHR | rs6988242   | T | 0.72 | 0.012  | 0.002 | 2.53E-08 | 0.008  | 0.009 | 4.10E-01 |
| WHR | rs7823561   | A | 0.65 | 0.016  | 0.002 | 5.84E-17 | 0.005  | 0.008 | 6.20E-01 |
| WHR | rs881301    | T | 0.58 | -0.013 | 0.002 | 9.74E-14 | -0.005 | 0.008 | 6.60E-01 |
| WHR | rs9643248   | T | 0.68 | -0.012 | 0.002 | 1.46E-08 | -0.018 | 0.008 | 2.50E-02 |
| WHR | rs9644033   | A | 0.75 | 0.019  | 0.002 | 3.48E-19 | 0.019  | 0.009 | 4.90E-02 |
| WHR | rs9969455   | A | 0.62 | 0.011  | 0.002 | 6.97E-10 | -0.005 | 0.008 | 4.20E-01 |
| WHR | rs10797116  | T | 0.46 | -0.010 | 0.002 | 2.01E-08 | -0.008 | 0.008 | 2.30E-01 |
| WHR | rs10963067  | A | 0.09 | -0.018 | 0.003 | 2.66E-08 | 0.011  | 0.014 | 3.80E-01 |
| WHR | rs10968576  | A | 0.69 | -0.014 | 0.002 | 1.24E-15 | -0.006 | 0.008 | 5.70E-01 |
| WHR | rs10978310  | A | 0.94 | 0.023  | 0.004 | 5.03E-09 | 0.018  | 0.018 | 3.30E-01 |
| WHR | rs10980797  | A | 0.52 | -0.015 | 0.002 | 1.36E-14 | 0.008  | 0.008 | 3.00E-01 |
| WHR | rs10991433  | T | 0.90 | -0.025 | 0.003 | 1.17E-19 | 0.008  | 0.013 | 5.20E-01 |
| WHR | rs12684047  | A | 0.19 | -0.019 | 0.002 | 8.73E-16 | -0.004 | 0.010 | 5.60E-01 |
| WHR | rs1411431   | A | 0.16 | 0.015  | 0.003 | 1.81E-08 | 0.003  | 0.011 | 7.90E-01 |
| WHR | rs1680490   | A | 0.59 | -0.012 | 0.002 | 3.64E-09 | 0.002  | 0.008 | 6.50E-01 |
| WHR | rs1752169   | A | 0.26 | 0.012  | 0.002 | 7.75E-10 | 0.024  | 0.009 | 7.20E-03 |
| WHR | rs1800978   | C | 0.88 | 0.020  | 0.003 | 1.07E-14 | -0.023 | 0.012 | 7.10E-02 |
| WHR | rs2043664   | A | 0.31 | -0.011 | 0.002 | 5.04E-08 | -0.003 | 0.008 | 7.00E-01 |
| WHR | rs2165864   | T | 0.43 | -0.010 | 0.002 | 1.46E-08 | -0.010 | 0.008 | 1.30E-01 |
| WHR | rs2398893   | A | 0.71 | 0.016  | 0.002 | 1.42E-16 | 0.010  | 0.009 | 2.60E-01 |
| WHR | rs28647893  | T | 0.48 | -0.012 | 0.002 | 6.63E-09 | -0.003 | 0.008 | 6.40E-01 |
| WHR | rs2937371   | A | 0.57 | -0.012 | 0.002 | 1.35E-10 | -0.003 | 0.008 | 7.80E-01 |
| WHR | rs4382592   | T | 0.31 | 0.012  | 0.002 | 2.69E-10 | 0.013  | 0.008 | 5.90E-02 |
| WHR | rs4837261   | T | 0.18 | 0.013  | 0.002 | 2.04E-08 | 0.017  | 0.010 | 8.90E-02 |
| WHR | rs62565259  | T | 0.16 | -0.016 | 0.003 | 6.07E-09 | -0.011 | 0.010 | 2.50E-01 |
| WHR | rs6474945   | T | 0.45 | -0.010 | 0.002 | 2.83E-09 | -0.013 | 0.008 | 1.00E-01 |
| WHR | rs71511786  | A | 0.92 | 0.021  | 0.004 | 8.92E-09 | -0.016 | 0.014 | 2.30E-01 |
| WHR | rs753804    | C | 0.17 | 0.017  | 0.002 | 7.53E-14 | 0.013  | 0.010 | 2.10E-01 |
| WHR | rs7848336   | T | 0.71 | -0.013 | 0.002 | 4.11E-11 | 0.008  | 0.009 | 3.40E-01 |
| WHR | rs7848552   | C | 0.20 | 0.013  | 0.002 | 2.62E-08 | 0.034  | 0.010 | 9.20E-04 |
| WHR | rs7859156   | T | 0.28 | -0.011 | 0.002 | 2.86E-08 | 0.000  | 0.009 | 9.90E-01 |
| WHR | rs968821    | C | 0.34 | -0.011 | 0.002 | 5.15E-09 | -0.006 | 0.008 | 3.90E-01 |
| WHR | rs9792666   | A | 0.96 | 0.040  | 0.005 | 6.11E-18 | 0.026  | 0.020 | 2.10E-01 |
| WHR | rs10761785  | T | 0.51 | -0.015 | 0.002 | 5.28E-18 | 0.009  | 0.008 | 3.30E-01 |
| WHR | rs10788569  | T | 0.72 | -0.013 | 0.002 | 1.76E-12 | -0.007 | 0.009 | 6.80E-01 |

|     |             |   |      |        |       |          |        |       |          |
|-----|-------------|---|------|--------|-------|----------|--------|-------|----------|
| WHR | rs10795055  | A | 0.39 | 0.011  | 0.002 | 3.89E-09 | -0.001 | 0.008 | 9.60E-01 |
| WHR | rs10827252  | A | 0.49 | -0.011 | 0.002 | 3.43E-10 | 0.009  | 0.008 | 2.30E-01 |
| WHR | rs10883518  | A | 0.37 | -0.011 | 0.002 | 7.06E-09 | 0.006  | 0.008 | 5.60E-01 |
| WHR | rs11187537  | C | 0.26 | 0.013  | 0.002 | 8.03E-11 | 0.015  | 0.009 | 9.90E-02 |
| WHR | rs117471638 | A | 0.02 | 0.042  | 0.007 | 3.60E-09 | 0.008  | 0.027 | 9.20E-01 |
| WHR | rs1243188   | T | 0.71 | -0.015 | 0.002 | 6.73E-15 | -0.018 | 0.008 | 6.40E-02 |
| WHR | rs1250552   | A | 0.52 | -0.009 | 0.002 | 3.21E-08 | -0.014 | 0.008 | 9.40E-02 |
| WHR | rs12774134  | T | 0.12 | -0.016 | 0.003 | 1.23E-09 | -0.024 | 0.012 | 6.20E-02 |
| WHR | rs12777288  | T | 0.77 | -0.014 | 0.002 | 3.62E-11 | -0.012 | 0.009 | 1.20E-01 |
| WHR | rs1437      | A | 0.63 | 0.013  | 0.002 | 1.15E-12 | 0.012  | 0.008 | 1.20E-01 |
| WHR | rs145952040 | T | 0.96 | -0.033 | 0.005 | 2.21E-10 | -0.003 | 0.021 | 9.60E-01 |
| WHR | rs1494204   | T | 0.42 | -0.011 | 0.002 | 3.89E-09 | -0.012 | 0.008 | 1.40E-01 |
| WHR | rs1757471   | T | 0.51 | 0.013  | 0.002 | 1.15E-12 | -0.001 | 0.008 | 8.10E-01 |
| WHR | rs2254069   | A | 0.13 | 0.021  | 0.003 | 9.88E-15 | 0.017  | 0.012 | 1.70E-01 |
| WHR | rs2907794   | A | 0.25 | -0.012 | 0.002 | 5.65E-10 | -0.002 | 0.009 | 6.40E-01 |
| WHR | rs3740237   | C | 0.14 | 0.015  | 0.003 | 3.99E-09 | 0.005  | 0.011 | 4.40E-01 |
| WHR | rs3814614   | A | 0.48 | 0.011  | 0.002 | 1.97E-09 | 0.007  | 0.008 | 4.40E-01 |
| WHR | rs4752083   | A | 0.62 | -0.011 | 0.002 | 1.20E-08 | -0.007 | 0.008 | 5.10E-01 |
| WHR | rs704000    | T | 0.47 | 0.011  | 0.002 | 5.04E-08 | -0.013 | 0.008 | 1.20E-01 |
| WHR | rs7070670   | T | 0.32 | -0.013 | 0.002 | 3.26E-10 | -0.008 | 0.008 | 3.10E-01 |
| WHR | rs7070749   | A | 0.55 | 0.013  | 0.002 | 2.98E-10 | 0.016  | 0.008 | 6.30E-02 |
| WHR | rs708437    | A | 0.83 | 0.014  | 0.002 | 1.97E-09 | -0.001 | 0.010 | 9.80E-01 |
| WHR | rs780159    | A | 0.43 | -0.013 | 0.002 | 5.14E-15 | 0.003  | 0.008 | 7.70E-01 |
| WHR | rs7898903   | T | 0.13 | -0.015 | 0.003 | 4.22E-08 | -0.022 | 0.012 | 7.80E-02 |
| WHR | rs7907173   | A | 0.45 | -0.011 | 0.002 | 1.40E-09 | -0.008 | 0.008 | 5.00E-01 |
| WHR | rs7919055   | T | 0.96 | -0.028 | 0.005 | 3.69E-10 | -0.005 | 0.022 | 8.60E-01 |
| WHR | rs10789931  | T | 0.12 | 0.015  | 0.003 | 2.77E-08 | -0.008 | 0.012 | 5.10E-01 |
| WHR | rs10791249  | A | 0.44 | 0.010  | 0.002 | 7.57E-09 | 0.010  | 0.008 | 1.80E-01 |
| WHR | rs10896012  | T | 0.79 | -0.018 | 0.002 | 2.80E-16 | -0.004 | 0.009 | 7.00E-01 |
| WHR | rs11030107  | A | 0.73 | -0.018 | 0.002 | 7.36E-21 | -0.019 | 0.009 | 4.80E-02 |
| WHR | rs11038354  | A | 0.57 | 0.011  | 0.002 | 5.43E-09 | 0.003  | 0.008 | 6.50E-01 |
| WHR | rs11214589  | A | 0.50 | -0.011 | 0.002 | 2.40E-10 | 0.011  | 0.008 | 2.40E-01 |
| WHR | rs11216183  | A | 0.09 | 0.023  | 0.003 | 2.99E-11 | 0.016  | 0.013 | 2.30E-01 |
| WHR | rs11231144  | T | 0.65 | -0.016 | 0.002 | 3.41E-16 | -0.007 | 0.008 | 3.50E-01 |
| WHR | rs12286929  | A | 0.50 | -0.009 | 0.002 | 3.21E-08 | -0.005 | 0.008 | 4.80E-01 |
| WHR | rs12287076  | C | 0.63 | 0.019  | 0.002 | 7.99E-22 | -0.012 | 0.009 | 1.80E-01 |
| WHR | rs12575252  | C | 0.33 | -0.015 | 0.002 | 1.17E-17 | -0.023 | 0.008 | 2.70E-03 |
| WHR | rs13642     | A | 0.65 | 0.011  | 0.002 | 2.72E-09 | 0.008  | 0.008 | 3.10E-01 |
| WHR | rs140201358 | C | 0.99 | -0.056 | 0.009 | 9.37E-11 | -0.154 | 0.032 | 2.70E-06 |
| WHR | rs140829434 | A | 0.02 | -0.044 | 0.008 | 3.41E-08 | -0.058 | 0.031 | 1.00E-01 |
| WHR | rs2276390   | T | 0.34 | -0.021 | 0.002 | 2.13E-28 | 0.003  | 0.008 | 6.70E-01 |
| WHR | rs2509963   | T | 0.26 | -0.014 | 0.002 | 8.68E-13 | 0.003  | 0.009 | 7.20E-01 |
| WHR | rs2512885   | T | 0.47 | -0.010 | 0.002 | 1.16E-08 | -0.007 | 0.008 | 3.50E-01 |
| WHR | rs2513987   | A | 0.27 | -0.014 | 0.002 | 3.55E-10 | -0.012 | 0.009 | 2.30E-01 |
| WHR | rs2957658   | A | 0.49 | -0.013 | 0.002 | 4.10E-10 | -0.017 | 0.008 | 1.80E-02 |
| WHR | rs35169799  | T | 0.06 | 0.037  | 0.004 | 9.24E-20 | 0.026  | 0.016 | 1.40E-01 |
| WHR | rs3825061   | T | 0.39 | 0.014  | 0.002 | 3.05E-15 | 0.007  | 0.008 | 3.00E-01 |
| WHR | rs3862386   | C | 0.19 | 0.014  | 0.002 | 1.15E-09 | 0.002  | 0.010 | 8.90E-01 |
| WHR | rs3930078   | A | 0.16 | 0.014  | 0.002 | 1.86E-08 | 0.014  | 0.010 | 1.30E-01 |
| WHR | rs4141261   | T | 0.36 | -0.011 | 0.002 | 9.65E-09 | 0.003  | 0.008 | 8.40E-01 |
| WHR | rs4418806   | T | 0.45 | -0.012 | 0.002 | 8.92E-09 | -0.005 | 0.008 | 4.50E-01 |
| WHR | rs4755720   | T | 0.61 | -0.013 | 0.002 | 2.24E-13 | -0.020 | 0.008 | 5.10E-03 |
| WHR | rs536665    | A | 0.80 | -0.017 | 0.002 | 1.04E-12 | -0.013 | 0.010 | 9.50E-02 |
| WHR | rs579682    | T | 0.71 | -0.013 | 0.002 | 2.93E-11 | -0.020 | 0.009 | 1.80E-02 |
| WHR | rs61876729  | A | 0.91 | 0.021  | 0.003 | 3.09E-10 | 0.030  | 0.013 | 2.10E-02 |
| WHR | rs647248    | A | 0.54 | 0.011  | 0.002 | 5.43E-09 | 0.009  | 0.008 | 2.30E-01 |

|     |            |   |      |        |       |          |        |       |          |
|-----|------------|---|------|--------|-------|----------|--------|-------|----------|
| WHR | rs6590683  | T | 0.48 | 0.011  | 0.002 | 3.43E-10 | 0.002  | 0.008 | 8.00E-01 |
| WHR | rs6606672  | A | 0.65 | -0.012 | 0.002 | 8.03E-11 | -0.002 | 0.008 | 8.80E-01 |
| WHR | rs67184556 | T | 0.32 | -0.012 | 0.002 | 2.53E-08 | -0.011 | 0.008 | 1.60E-01 |
| WHR | rs68162171 | A | 0.71 | -0.016 | 0.002 | 1.79E-13 | -0.022 | 0.009 | 1.30E-02 |
| WHR | rs72889643 | T | 0.06 | 0.023  | 0.004 | 1.03E-08 | -0.014 | 0.016 | 4.60E-01 |
| WHR | rs7395513  | A | 0.44 | -0.017 | 0.002 | 5.15E-18 | 0.001  | 0.008 | 9.50E-01 |
| WHR | rs747249   | A | 0.36 | 0.011  | 0.002 | 5.15E-09 | 0.016  | 0.008 | 5.90E-02 |
| WHR | rs747601   | A | 0.28 | -0.013 | 0.002 | 1.55E-10 | 0.000  | 0.009 | 9.30E-01 |
| WHR | rs7932891  | A | 0.30 | 0.011  | 0.002 | 1.60E-08 | 0.003  | 0.008 | 8.10E-01 |
| WHR | rs1026462  | A | 0.52 | -0.013 | 0.002 | 2.56E-12 | -0.012 | 0.008 | 1.80E-01 |
| WHR | rs10506110 | A | 0.64 | 0.014  | 0.002 | 3.78E-13 | 0.004  | 0.008 | 6.20E-01 |
| WHR | rs10745659 | C | 0.56 | -0.013 | 0.002 | 1.72E-12 | 0.001  | 0.008 | 9.70E-01 |
| WHR | rs10861841 | A | 0.42 | 0.011  | 0.002 | 6.97E-10 | 0.011  | 0.008 | 2.20E-01 |
| WHR | rs10876528 | A | 0.35 | 0.024  | 0.002 | 2.84E-39 | -0.007 | 0.008 | 3.10E-01 |
| WHR | rs11048456 | T | 0.76 | -0.027 | 0.002 | 1.56E-44 | -0.012 | 0.009 | 1.40E-01 |
| WHR | rs11055887 | A | 0.19 | -0.013 | 0.002 | 7.36E-09 | -0.016 | 0.010 | 6.20E-02 |
| WHR | rs11176015 | T | 0.29 | 0.015  | 0.002 | 4.35E-14 | -0.002 | 0.009 | 8.20E-01 |
| WHR | rs11608693 | A | 0.17 | -0.017 | 0.003 | 4.90E-10 | 0.000  | 0.011 | 9.60E-01 |
| WHR | rs12823266 | A | 0.72 | 0.011  | 0.002 | 5.68E-08 | 0.010  | 0.009 | 2.50E-01 |
| WHR | rs12828016 | T | 0.39 | -0.011 | 0.002 | 2.40E-10 | -0.011 | 0.008 | 1.60E-01 |
| WHR | rs12828318 | A | 0.83 | 0.013  | 0.002 | 1.58E-08 | 0.011  | 0.010 | 1.90E-01 |
| WHR | rs1443512  | A | 0.22 | 0.028  | 0.002 | 3.80E-45 | 0.008  | 0.009 | 3.70E-01 |
| WHR | rs1568427  | A | 0.26 | -0.019 | 0.002 | 3.48E-19 | -0.002 | 0.009 | 7.70E-01 |
| WHR | rs1609725  | T | 0.07 | 0.021  | 0.003 | 1.65E-09 | 0.019  | 0.016 | 2.40E-01 |
| WHR | rs2277339  | T | 0.89 | -0.017 | 0.003 | 6.91E-09 | -0.020 | 0.013 | 1.30E-01 |
| WHR | rs317646   | A | 0.73 | -0.011 | 0.002 | 3.80E-08 | 0.001  | 0.009 | 5.70E-01 |
| WHR | rs34322    | T | 0.47 | 0.010  | 0.002 | 7.57E-09 | 0.009  | 0.008 | 2.20E-01 |
| WHR | rs3764002  | T | 0.26 | -0.021 | 0.002 | 5.08E-26 | -0.008 | 0.009 | 3.40E-01 |
| WHR | rs4459369  | T | 0.73 | 0.012  | 0.002 | 4.35E-08 | -0.004 | 0.009 | 5.90E-01 |
| WHR | rs4765219  | A | 0.34 | -0.027 | 0.002 | 8.92E-50 | -0.025 | 0.008 | 3.10E-03 |
| WHR | rs4964188  | T | 0.50 | -0.011 | 0.002 | 2.14E-08 | -0.005 | 0.008 | 5.00E-01 |
| WHR | rs544668   | T | 0.60 | 0.011  | 0.002 | 5.43E-09 | 0.006  | 0.008 | 3.70E-01 |
| WHR | rs6487543  | A | 0.76 | 0.012  | 0.002 | 6.27E-09 | 0.004  | 0.009 | 7.00E-01 |
| WHR | rs7138803  | A | 0.38 | 0.013  | 0.002 | 3.80E-12 | 0.001  | 0.008 | 8.30E-01 |
| WHR | rs7222     | T | 0.50 | 0.011  | 0.002 | 1.40E-09 | 0.006  | 0.008 | 5.70E-01 |
| WHR | rs729062   | A | 0.93 | -0.020 | 0.004 | 1.46E-08 | 0.003  | 0.015 | 8.90E-01 |
| WHR | rs7311622  | T | 0.45 | -0.012 | 0.002 | 3.81E-11 | 0.012  | 0.008 | 1.20E-01 |
| WHR | rs74628422 | A | 0.20 | 0.014  | 0.002 | 4.23E-09 | -0.012 | 0.010 | 1.90E-01 |
| WHR | rs79204097 | A | 0.10 | -0.019 | 0.003 | 1.63E-08 | -0.014 | 0.013 | 3.10E-01 |
| WHR | rs7961979  | A | 0.13 | 0.016  | 0.003 | 6.07E-09 | 0.011  | 0.012 | 2.30E-01 |
| WHR | rs863750   | T | 0.58 | 0.026  | 0.002 | 2.06E-52 | 0.014  | 0.008 | 6.60E-02 |
| WHR | rs1163627  | A | 0.54 | 0.010  | 0.002 | 9.50E-10 | 0.012  | 0.008 | 1.20E-01 |
| WHR | rs12430764 | A | 0.52 | 0.011  | 0.002 | 2.77E-09 | -0.005 | 0.008 | 5.50E-01 |
| WHR | rs1360485  | T | 0.68 | 0.015  | 0.002 | 3.05E-17 | 0.016  | 0.008 | 3.80E-02 |
| WHR | rs1379828  | T | 0.81 | -0.013 | 0.002 | 4.43E-10 | -0.014 | 0.010 | 1.40E-01 |
| WHR | rs1441264  | A | 0.59 | 0.011  | 0.002 | 6.97E-10 | 0.002  | 0.008 | 9.10E-01 |
| WHR | rs2225226  | T | 0.21 | 0.012  | 0.002 | 3.32E-08 | 0.004  | 0.009 | 6.60E-01 |
| WHR | rs2475837  | T | 0.12 | 0.015  | 0.003 | 6.33E-09 | -0.003 | 0.012 | 6.50E-01 |
| WHR | rs4055791  | T | 0.42 | -0.012 | 0.002 | 3.64E-09 | -0.014 | 0.008 | 8.50E-02 |
| WHR | rs664532   | T | 0.38 | 0.011  | 0.002 | 2.72E-09 | 0.008  | 0.008 | 3.50E-01 |
| WHR | rs7350648  | T | 0.80 | 0.014  | 0.003 | 3.39E-08 | 0.004  | 0.010 | 7.10E-01 |
| WHR | rs797486   | A | 0.89 | 0.032  | 0.003 | 5.47E-34 | 0.011  | 0.012 | 3.20E-01 |
| WHR | rs7985834  | A | 0.86 | -0.017 | 0.003 | 6.20E-10 | -0.007 | 0.012 | 5.10E-01 |
| WHR | rs9515201  | A | 0.31 | -0.012 | 0.002 | 1.79E-11 | -0.020 | 0.009 | 7.90E-03 |
| WHR | rs9556979  | T | 0.69 | -0.011 | 0.002 | 2.72E-09 | -0.031 | 0.008 | 4.60E-04 |
| WHR | rs9596270  | T | 0.93 | 0.027  | 0.003 | 7.70E-16 | 0.044  | 0.016 | 8.30E-03 |

|     |            |   |      |        |       |           |        |       |          |
|-----|------------|---|------|--------|-------|-----------|--------|-------|----------|
| WHR | rs10132280 | A | 0.31 | -0.012 | 0.002 | 1.16E-10  | 0.002  | 0.008 | 6.30E-01 |
| WHR | rs10133795 | A | 0.51 | -0.010 | 0.002 | 7.57E-09  | -0.002 | 0.008 | 8.90E-01 |
| WHR | rs1190982  | T | 0.30 | 0.016  | 0.002 | 1.42E-16  | -0.003 | 0.008 | 5.10E-01 |
| WHR | rs17109256 | A | 0.23 | 0.017  | 0.002 | 8.44E-16  | 0.000  | 0.009 | 1.00E+00 |
| WHR | rs2205189  | A | 0.28 | 0.011  | 0.002 | 1.60E-08  | 0.002  | 0.009 | 9.20E-01 |
| WHR | rs2412107  | T | 0.22 | 0.013  | 0.002 | 2.40E-10  | -0.004 | 0.009 | 5.90E-01 |
| WHR | rs2526886  | T | 0.69 | 0.013  | 0.002 | 2.64E-09  | 0.016  | 0.008 | 2.50E-02 |
| WHR | rs4902632  | A | 0.18 | 0.016  | 0.002 | 1.06E-10  | 0.006  | 0.010 | 5.50E-01 |
| WHR | rs61986159 | T | 0.23 | 0.014  | 0.002 | 3.36E-09  | 0.000  | 0.009 | 9.40E-01 |
| WHR | rs699371   | T | 0.36 | -0.011 | 0.002 | 2.42E-08  | -0.003 | 0.008 | 4.80E-01 |
| WHR | rs7143963  | T | 0.17 | 0.014  | 0.002 | 6.34E-10  | 0.003  | 0.010 | 7.30E-01 |
| WHR | rs7492628  | C | 0.68 | -0.013 | 0.002 | 4.74E-11  | -0.026 | 0.008 | 1.70E-03 |
| WHR | rs11071759 | T | 0.39 | 0.010  | 0.002 | 7.57E-09  | 0.008  | 0.008 | 2.90E-01 |
| WHR | rs11854996 | A | 0.74 | 0.011  | 0.002 | 1.20E-08  | -0.007 | 0.009 | 4.20E-01 |
| WHR | rs12101393 | C | 0.79 | 0.014  | 0.002 | 1.97E-10  | 0.014  | 0.009 | 1.00E-01 |
| WHR | rs12440605 | A | 0.52 | 0.012  | 0.002 | 5.54E-11  | -0.003 | 0.008 | 5.80E-01 |
| WHR | rs12440695 | T | 0.62 | -0.010 | 0.002 | 1.05E-08  | 0.002  | 0.008 | 6.90E-01 |
| WHR | rs12593088 | A | 0.31 | -0.013 | 0.002 | 1.62E-11  | -0.013 | 0.008 | 1.40E-01 |
| WHR | rs12595496 | A | 0.87 | -0.018 | 0.003 | 1.08E-12  | -0.019 | 0.012 | 1.50E-01 |
| WHR | rs12908637 | C | 0.87 | 0.016  | 0.003 | 7.57E-09  | 0.024  | 0.011 | 2.80E-02 |
| WHR | rs13329447 | T | 0.61 | -0.010 | 0.002 | 2.01E-08  | -0.007 | 0.008 | 4.20E-01 |
| WHR | rs1657930  | A | 0.79 | -0.013 | 0.002 | 1.12E-09  | -0.001 | 0.010 | 9.90E-01 |
| WHR | rs17158366 | A | 0.10 | -0.016 | 0.003 | 1.10E-08  | -0.002 | 0.013 | 8.00E-01 |
| WHR | rs1992145  | A | 0.55 | 0.011  | 0.002 | 6.97E-10  | 0.010  | 0.008 | 2.90E-01 |
| WHR | rs2061007  | C | 0.59 | -0.011 | 0.002 | 5.43E-09  | -0.007 | 0.008 | 3.30E-01 |
| WHR | rs2456530  | T | 0.14 | 0.016  | 0.003 | 3.63E-10  | 0.013  | 0.011 | 2.40E-01 |
| WHR | rs2469081  | T | 0.27 | -0.013 | 0.002 | 1.12E-10  | 0.020  | 0.009 | 2.20E-02 |
| WHR | rs3092982  | C | 0.50 | 0.010  | 0.002 | 1.46E-08  | -0.001 | 0.008 | 9.60E-01 |
| WHR | rs3736485  | A | 0.46 | 0.012  | 0.002 | 3.89E-12  | 0.002  | 0.008 | 8.80E-01 |
| WHR | rs4779526  | A | 0.76 | 0.013  | 0.002 | 3.26E-10  | 0.002  | 0.009 | 8.30E-01 |
| WHR | rs7183908  | T | 0.51 | -0.016 | 0.002 | 2.79E-15  | -0.004 | 0.008 | 6.10E-01 |
| WHR | rs8024294  | A | 0.11 | 0.018  | 0.003 | 2.59E-10  | 0.001  | 0.013 | 9.60E-01 |
| WHR | rs8039418  | T | 0.43 | -0.011 | 0.002 | 3.43E-10  | -0.023 | 0.008 | 9.50E-04 |
| WHR | rs8043060  | A | 0.22 | -0.017 | 0.002 | 1.04E-16  | -0.003 | 0.009 | 7.60E-01 |
| WHR | rs1558902  | A | 0.41 | 0.040  | 0.002 | 3.24E-121 | 0.024  | 0.008 | 2.60E-03 |
| WHR | rs2008514  | A | 0.38 | 0.017  | 0.002 | 1.52E-23  | 0.018  | 0.008 | 1.80E-02 |
| WHR | rs2047937  | T | 0.52 | -0.011 | 0.002 | 4.51E-10  | -0.002 | 0.008 | 8.10E-01 |
| WHR | rs220381   | A | 0.67 | -0.011 | 0.002 | 2.42E-08  | -0.003 | 0.008 | 7.20E-01 |
| WHR | rs2531992  | A | 0.16 | -0.013 | 0.002 | 1.58E-08  | -0.016 | 0.011 | 1.70E-01 |
| WHR | rs2925979  | T | 0.30 | 0.022  | 0.002 | 6.94E-33  | 0.019  | 0.008 | 2.20E-02 |
| WHR | rs3747579  | T | 0.71 | -0.015 | 0.002 | 7.86E-17  | -0.015 | 0.009 | 8.00E-02 |
| WHR | rs400223   | T | 0.48 | 0.010  | 0.002 | 2.77E-08  | 0.006  | 0.008 | 4.80E-01 |
| WHR | rs4243130  | T | 0.81 | -0.012 | 0.002 | 8.32E-09  | -0.017 | 0.010 | 6.20E-02 |
| WHR | rs4782289  | A | 0.13 | -0.015 | 0.003 | 5.22E-09  | -0.035 | 0.011 | 2.70E-03 |
| WHR | rs4788204  | A | 0.46 | 0.017  | 0.002 | 6.06E-21  | -0.001 | 0.008 | 9.60E-01 |
| WHR | rs71385734 | T | 0.83 | 0.019  | 0.003 | 1.53E-13  | -0.004 | 0.010 | 6.90E-01 |
| WHR | rs7186893  | T | 0.26 | -0.014 | 0.002 | 7.38E-12  | -0.015 | 0.009 | 1.10E-01 |
| WHR | rs7198287  | T | 0.22 | -0.014 | 0.002 | 3.55E-10  | -0.010 | 0.010 | 2.80E-01 |
| WHR | rs7206608  | C | 0.68 | -0.013 | 0.002 | 2.32E-11  | -0.016 | 0.008 | 4.00E-02 |
| WHR | rs8054299  | C | 0.69 | 0.011  | 0.002 | 1.79E-08  | 0.017  | 0.008 | 3.30E-02 |
| WHR | rs8054765  | C | 0.77 | -0.012 | 0.002 | 8.32E-09  | -0.010 | 0.009 | 2.50E-01 |
| WHR | rs8060576  | T | 0.12 | 0.016  | 0.003 | 2.48E-09  | 0.016  | 0.012 | 1.40E-01 |
| WHR | rs889398   | T | 0.41 | -0.017 | 0.002 | 8.40E-24  | -0.016 | 0.008 | 4.90E-02 |
| WHR | rs929069   | A | 0.19 | 0.013  | 0.002 | 2.62E-08  | 0.026  | 0.010 | 1.30E-02 |
| WHR | rs10512605 | T | 0.08 | 0.023  | 0.003 | 2.56E-12  | 0.043  | 0.014 | 3.00E-03 |
| WHR | rs11654387 | C | 0.49 | 0.016  | 0.002 | 3.74E-19  | -0.002 | 0.008 | 5.90E-01 |

|     |             |   |      |        |       |          |        |       |          |
|-----|-------------|---|------|--------|-------|----------|--------|-------|----------|
| WHR | rs11654395  | T | 0.92 | -0.018 | 0.003 | 4.14E-08 | -0.030 | 0.014 | 1.00E-02 |
| WHR | rs12450225  | A | 0.50 | -0.011 | 0.002 | 6.56E-10 | 0.000  | 0.008 | 7.90E-01 |
| WHR | rs12601665  | C | 0.58 | 0.010  | 0.002 | 2.77E-08 | 0.002  | 0.008 | 9.60E-01 |
| WHR | rs12602912  | T | 0.21 | 0.018  | 0.002 | 5.25E-17 | 0.006  | 0.010 | 6.20E-01 |
| WHR | rs2306589   | T | 0.47 | 0.016  | 0.002 | 4.88E-21 | 0.002  | 0.008 | 9.60E-01 |
| WHR | rs4239275   | T | 0.41 | 0.012  | 0.002 | 5.54E-11 | 0.010  | 0.008 | 2.00E-01 |
| WHR | rs55938136  | A | 0.78 | -0.018 | 0.002 | 2.44E-14 | -0.015 | 0.009 | 1.20E-01 |
| WHR | rs591939    | A | 0.75 | -0.018 | 0.002 | 1.41E-14 | -0.011 | 0.009 | 2.40E-01 |
| WHR | rs62063286  | T | 0.78 | 0.024  | 0.002 | 6.55E-24 | 0.019  | 0.010 | 5.50E-02 |
| WHR | rs672356    | A | 0.30 | -0.013 | 0.002 | 3.26E-10 | 0.005  | 0.008 | 5.80E-01 |
| WHR | rs7209595   | C | 0.45 | 0.014  | 0.002 | 4.17E-14 | 0.002  | 0.008 | 7.40E-01 |
| WHR | rs7213608   | T | 0.68 | -0.017 | 0.002 | 2.26E-19 | -0.005 | 0.008 | 4.30E-01 |
| WHR | rs7217226   | T | 0.66 | -0.014 | 0.002 | 2.72E-14 | -0.001 | 0.008 | 8.60E-01 |
| WHR | rs7222766   | A | 0.47 | 0.009  | 0.002 | 4.49E-08 | -0.005 | 0.008 | 5.60E-01 |
| WHR | rs7223966   | A | 0.29 | -0.014 | 0.002 | 5.57E-13 | 0.001  | 0.009 | 9.50E-01 |
| WHR | rs72820838  | T | 0.05 | 0.025  | 0.004 | 7.80E-09 | 0.002  | 0.017 | 7.50E-01 |
| WHR | rs77617442  | T | 0.28 | 0.012  | 0.002 | 2.93E-08 | -0.017 | 0.009 | 5.30E-02 |
| WHR | rs8070737   | T | 0.17 | 0.016  | 0.002 | 3.49E-12 | -0.009 | 0.010 | 3.20E-01 |
| WHR | rs8071778   | C | 0.15 | -0.016 | 0.003 | 1.55E-10 | -0.007 | 0.011 | 4.70E-01 |
| WHR | rs8074344   | A | 0.43 | 0.012  | 0.002 | 6.63E-09 | 0.014  | 0.008 | 8.80E-02 |
| WHR | rs858519    | T | 0.45 | 0.012  | 0.002 | 1.45E-09 | 0.017  | 0.008 | 2.70E-02 |
| WHR | rs9895436   | A | 0.41 | -0.011 | 0.002 | 5.43E-09 | 0.005  | 0.008 | 5.30E-01 |
| WHR | rs9905140   | T | 0.39 | 0.011  | 0.002 | 2.00E-11 | -0.008 | 0.008 | 3.70E-01 |
| WHR | rs9988      | T | 0.83 | 0.015  | 0.002 | 2.40E-10 | 0.025  | 0.010 | 2.80E-02 |
| WHR | rs10164099  | T | 0.87 | -0.015 | 0.003 | 2.52E-09 | -0.002 | 0.011 | 7.90E-01 |
| WHR | rs1158805   | A | 0.38 | -0.013 | 0.002 | 1.48E-13 | -0.020 | 0.008 | 1.20E-02 |
| WHR | rs11664106  | A | 0.63 | 0.020  | 0.002 | 1.67E-21 | 0.014  | 0.008 | 6.90E-02 |
| WHR | rs1787013   | T | 0.56 | -0.011 | 0.002 | 1.97E-09 | -0.013 | 0.008 | 8.80E-02 |
| WHR | rs28434748  | A | 0.80 | -0.015 | 0.002 | 2.40E-10 | -0.005 | 0.010 | 5.00E-01 |
| WHR | rs2981423   | T | 0.94 | 0.019  | 0.004 | 2.98E-08 | 0.008  | 0.016 | 6.70E-01 |
| WHR | rs62095889  | A | 0.34 | -0.017 | 0.002 | 2.68E-15 | -0.002 | 0.008 | 8.60E-01 |
| WHR | rs6567160   | T | 0.75 | -0.026 | 0.002 | 1.70E-39 | 0.004  | 0.009 | 8.60E-01 |
| WHR | rs7235891   | T | 0.52 | -0.012 | 0.002 | 1.16E-10 | -0.002 | 0.008 | 8.00E-01 |
| WHR | rs7239114   | A | 0.54 | 0.010  | 0.002 | 2.29E-08 | 0.008  | 0.008 | 2.20E-01 |
| WHR | rs8096564   | T | 0.28 | 0.011  | 0.002 | 1.20E-08 | 0.014  | 0.009 | 1.00E-01 |
| WHR | rs9947450   | T | 0.04 | -0.038 | 0.004 | 1.83E-18 | -0.016 | 0.020 | 4.30E-01 |
| WHR | rs9951872   | A | 0.16 | 0.021  | 0.002 | 9.22E-18 | 0.007  | 0.011 | 5.30E-01 |
| WHR | rs1035942   | A | 0.27 | 0.012  | 0.002 | 1.45E-09 | 0.018  | 0.009 | 2.90E-02 |
| WHR | rs11084735  | A | 0.68 | 0.013  | 0.002 | 2.32E-11 | -0.009 | 0.008 | 3.20E-01 |
| WHR | rs12459350  | A | 0.54 | 0.013  | 0.002 | 3.21E-15 | 0.001  | 0.008 | 9.70E-01 |
| WHR | rs12461964  | A | 0.51 | -0.013 | 0.002 | 4.10E-10 | -0.005 | 0.008 | 5.00E-01 |
| WHR | rs12608504  | A | 0.36 | 0.025  | 0.002 | 3.40E-44 | 0.031  | 0.008 | 6.20E-05 |
| WHR | rs142927801 | A | 0.02 | -0.041 | 0.007 | 1.42E-08 | -0.059 | 0.028 | 4.70E-02 |
| WHR | rs17724992  | A | 0.72 | 0.014  | 0.002 | 5.22E-14 | -0.014 | 0.009 | 1.20E-01 |
| WHR | rs1800437   | C | 0.19 | -0.021 | 0.002 | 2.10E-21 | 0.015  | 0.010 | 1.00E-01 |
| WHR | rs34132828  | A | 0.69 | -0.016 | 0.002 | 4.60E-11 | 0.006  | 0.010 | 5.10E-01 |
| WHR | rs350846    | C | 0.12 | 0.015  | 0.003 | 3.80E-08 | -0.005 | 0.012 | 7.50E-01 |
| WHR | rs3786897   | A | 0.58 | -0.024 | 0.002 | 3.56E-44 | 0.003  | 0.008 | 6.60E-01 |
| WHR | rs3810291   | A | 0.65 | 0.012  | 0.002 | 1.79E-11 | -0.004 | 0.008 | 6.60E-01 |
| WHR | rs429358    | T | 0.85 | 0.035  | 0.003 | 1.35E-37 | 0.121  | 0.011 | 1.50E-29 |
| WHR | rs439223    | A | 0.08 | 0.024  | 0.003 | 8.87E-13 | 0.042  | 0.015 | 8.70E-03 |
| WHR | rs4808845   | A | 0.59 | 0.012  | 0.002 | 1.06E-09 | 0.010  | 0.008 | 2.80E-01 |
| WHR | rs55957788  | A | 0.30 | 0.013  | 0.002 | 6.00E-10 | 0.007  | 0.009 | 3.50E-01 |
| WHR | rs7257330   | A | 0.38 | 0.013  | 0.002 | 2.24E-13 | -0.002 | 0.008 | 8.90E-01 |
| WHR | rs8103017   | C | 0.70 | -0.017 | 0.002 | 6.38E-14 | 0.003  | 0.009 | 5.80E-01 |
| WHR | rs998732    | A | 0.83 | 0.017  | 0.002 | 7.29E-13 | 0.011  | 0.011 | 3.30E-01 |



|       |             |   |      |        |       |          |        |       |          |
|-------|-------------|---|------|--------|-------|----------|--------|-------|----------|
| WHR   | rs1328757   | T | 0.47 | 0.011  | 0.002 | 2.40E-10 | -0.003 | 0.008 | 6.90E-01 |
| WHR   | rs143384    | A | 0.59 | 0.016  | 0.002 | 7.68E-20 | -0.009 | 0.008 | 3.20E-01 |
| WHR   | rs1997833   | T | 0.71 | -0.012 | 0.002 | 1.35E-10 | -0.002 | 0.009 | 7.70E-01 |
| WHR   | rs2104574   | T | 0.30 | -0.010 | 0.002 | 7.94E-08 | -0.009 | 0.009 | 3.30E-01 |
| WHR   | rs2236519   | A | 0.37 | 0.021  | 0.002 | 5.08E-32 | 0.011  | 0.008 | 1.70E-01 |
| WHR   | rs3092781   | T | 0.45 | -0.015 | 0.002 | 1.47E-17 | -0.020 | 0.008 | 9.00E-03 |
| WHR   | rs4812700   | T | 0.14 | -0.018 | 0.003 | 2.78E-10 | -0.008 | 0.012 | 5.50E-01 |
| WHR   | rs6021889   | A | 0.71 | 0.020  | 0.002 | 1.21E-26 | 0.020  | 0.009 | 2.40E-02 |
| WHR   | rs7267979   | A | 0.44 | 0.010  | 0.002 | 2.83E-09 | 0.028  | 0.008 | 1.30E-04 |
| WHR   | rs805770    | T | 0.40 | 0.018  | 0.002 | 4.65E-23 | 0.014  | 0.008 | 9.90E-02 |
| WHR   | rs910382    | A | 0.49 | -0.017 | 0.002 | 6.06E-21 | -0.009 | 0.008 | 2.80E-01 |
| WHR   | rs979012    | T | 0.36 | 0.012  | 0.002 | 1.16E-10 | 0.012  | 0.008 | 8.80E-02 |
| WHR   | rs2823096   | A | 0.81 | 0.013  | 0.002 | 2.62E-08 | 0.007  | 0.010 | 4.90E-01 |
| WHR   | rs2836179   | A | 0.41 | -0.013 | 0.002 | 2.24E-13 | -0.017 | 0.008 | 2.80E-02 |
| WHR   | rs2838006   | T | 0.36 | -0.011 | 0.002 | 9.65E-09 | -0.005 | 0.008 | 5.80E-01 |
| WHR   | rs2839108   | T | 0.74 | -0.011 | 0.002 | 1.60E-08 | -0.010 | 0.009 | 2.40E-01 |
| WHR   | rs28451064  | A | 0.13 | 0.018  | 0.003 | 3.64E-09 | 0.009  | 0.012 | 3.90E-01 |
| WHR   | rs2294239   | A | 0.57 | 0.020  | 0.002 | 5.93E-32 | 0.007  | 0.008 | 4.60E-01 |
| WHR   | rs3788529   | A | 0.70 | -0.012 | 0.002 | 8.32E-09 | -0.013 | 0.009 | 1.20E-01 |
| WHR   | rs4820408   | T | 0.38 | 0.011  | 0.002 | 1.44E-10 | -0.011 | 0.008 | 1.60E-01 |
| WHR   | rs510197    | A | 0.80 | -0.015 | 0.002 | 4.37E-11 | -0.008 | 0.010 | 4.50E-01 |
| WHR   | rs5762919   | T | 0.95 | -0.028 | 0.004 | 1.60E-10 | 0.000  | 0.020 | 8.80E-01 |
| WHR   | rs713770    | A | 0.36 | 0.012  | 0.002 | 3.81E-11 | 0.005  | 0.008 | 5.00E-01 |
| WHR   | rs8141715   | T | 0.75 | -0.014 | 0.002 | 1.05E-11 | -0.008 | 0.009 | 4.80E-01 |
| ACEI  | rs4291      | A | 0.63 | -0.028 | 0.003 | 9.09E-20 | 0.001  | 0.008 | 9.80E-01 |
| BBs   | rs11196549  | G | 0.96 | -0.069 | 0.008 | 1.63E-18 | 0.033  | 0.019 | 7.10E-02 |
| BBs   | rs11196597  | G | 0.87 | -0.029 | 0.005 | 4.37E-10 | 0.018  | 0.012 | 1.10E-01 |
| BBs   | rs17875473  | C | 0.92 | -0.033 | 0.006 | 2.72E-09 | 0.026  | 0.014 | 5.40E-02 |
| BBs   | rs1801253   | G | 0.26 | -0.046 | 0.003 | 3.18E-41 | 0.002  | 0.009 | 8.90E-01 |
| BBs   | rs4359161   | A | 0.18 | -0.027 | 0.004 | 9.88E-12 | 0.023  | 0.010 | 2.70E-02 |
| BBs   | rs460718    | A | 0.33 | -0.028 | 0.003 | 1.45E-17 | -0.001 | 0.008 | 9.00E-01 |
| CCB   | rs113210396 | T | 0.05 | -0.043 | 0.008 | 1.76E-08 | -0.001 | 0.018 | 9.60E-01 |
| CCB   | rs114987861 | G | 0.97 | -0.053 | 0.010 | 3.37E-08 | 0.010  | 0.024 | 6.40E-01 |
| CCB   | rs3821843   | G | 0.32 | -0.034 | 0.003 | 7.60E-24 | -0.002 | 0.008 | 9.90E-01 |
| CCB   | rs7340705   | T | 0.68 | -0.024 | 0.003 | 5.03E-14 | -0.007 | 0.008 | 4.00E-01 |
| CCB   | rs10828399  | A | 0.51 | -0.019 | 0.003 | 1.14E-10 | -0.004 | 0.008 | 6.80E-01 |
| CCB   | rs10828452  | T | 0.21 | -0.030 | 0.004 | 4.14E-15 | 0.015  | 0.010 | 9.00E-02 |
| CCB   | rs11014170  | A | 0.02 | -0.067 | 0.012 | 5.64E-09 | 0.025  | 0.029 | 3.40E-01 |
| CCB   | rs112133583 | T | 0.03 | -0.055 | 0.010 | 1.20E-08 | 0.004  | 0.023 | 6.80E-01 |
| CCB   | rs12258967  | G | 0.30 | -0.063 | 0.003 | 1.22E-78 | 0.010  | 0.008 | 1.70E-01 |
| CCB   | rs12780039  | G | 0.88 | -0.029 | 0.005 | 1.29E-09 | 0.003  | 0.012 | 7.70E-01 |
| CCB   | rs16916914  | T | 0.97 | -0.056 | 0.008 | 2.70E-12 | 0.002  | 0.022 | 8.80E-01 |
| CCB   | rs1779209   | C | 0.72 | -0.027 | 0.003 | 3.86E-16 | 0.020  | 0.009 | 3.10E-02 |
| CCB   | rs1888693   | G | 0.66 | -0.039 | 0.003 | 4.47E-34 | 0.015  | 0.008 | 6.50E-02 |
| CCB   | rs1998822   | A | 0.72 | -0.020 | 0.003 | 1.14E-08 | 0.004  | 0.009 | 5.50E-01 |
| CCB   | rs2488136   | G | 0.71 | -0.023 | 0.003 | 1.29E-11 | 0.009  | 0.008 | 4.10E-01 |
| CCB   | rs4748474   | G | 0.48 | -0.019 | 0.003 | 1.54E-10 | 0.010  | 0.008 | 1.80E-01 |
| CCB   | rs61278674  | A | 0.90 | -0.033 | 0.005 | 1.01E-09 | 0.022  | 0.013 | 1.10E-01 |
| CCB   | rs7076319   | A | 0.74 | -0.032 | 0.003 | 4.80E-21 | 0.012  | 0.009 | 2.20E-01 |
| CCB   | rs72786098  | A | 0.03 | -0.050 | 0.009 | 1.20E-08 | 0.038  | 0.021 | 4.60E-02 |
| CCB   | rs7923191   | A | 0.79 | -0.037 | 0.004 | 9.82E-23 | -0.009 | 0.010 | 4.00E-01 |
| CCB   | rs150857355 | G | 0.98 | -0.094 | 0.011 | 5.15E-17 | 0.010  | 0.027 | 7.20E-01 |
| CCB   | rs2239046   | G | 0.32 | -0.021 | 0.003 | 1.01E-10 | -0.016 | 0.008 | 3.20E-02 |
| CCB   | rs714277    | C | 0.72 | -0.020 | 0.003 | 2.46E-09 | -0.003 | 0.009 | 7.60E-01 |
| HMGCR | rs12916     | T | 0.60 | -0.235 | 0.012 | 6.58E-83 | 0.009  | 0.008 | 2.40E-01 |
| LDLR  | rs6511720   | T | 0.12 | -0.677 | 0.014 | 0.00E+00 | 0.016  | 0.012 | 2.30E-01 |

|        |            |   |      |        |       |          |        |       |          |
|--------|------------|---|------|--------|-------|----------|--------|-------|----------|
| LDLR   | rs688      | C | 0.55 | -0.173 | 0.012 | 3.04E-48 | -0.010 | 0.008 | 2.40E-01 |
| NPC1L1 | rs2073547  | A | 0.81 | -0.150 | 0.015 | 4.53E-23 | -0.014 | 0.010 | 1.80E-01 |
| PCSK9  | rs10888897 | T | 0.39 | -0.162 | 0.000 | 0.00E+00 | 0.007  | 0.008 | 3.50E-01 |
| PCSK9  | rs2479394  | A | 0.72 | -0.124 | 0.000 | 0.00E+00 | 0.000  | 0.009 | 9.30E-01 |

**Supplementary Table 2. Characteristics of participants in the genome-wide association analysis of hepatic fat**

| Characteristics                                   | Value         |
|---------------------------------------------------|---------------|
| Female                                            | 19049 (51.9%) |
| Age at enrollment, years                          | 54.9 (7.47)   |
| Age at imaging, years                             | 64.2 (7.56)   |
| Coronary artery disease                           | 1076 (2.9%)   |
| Diabetes                                          | 1808 (4.9%)   |
| Obese                                             | 6495 (17.7%)  |
| Hypertension                                      | 10289 (28.0%) |
| Medications                                       |               |
| Anti-hypertensive therapy                         | 4940 (13.5%)  |
| Lipid-lowering therapy                            | 5552 (15.1%)  |
| Anthropometric data                               |               |
| Weight, kg                                        | 76.8 (14.8)   |
| Waist-to-hip ratio                                | 0.86 (0.09)   |
| Body-mass index, kg/m <sup>2</sup>                | 26.6 (4.19)   |
| Body fat, %                                       | 30.0 (8.17)   |
| Estimated untreated systolic blood pressure, mmHg | 137 (19.3)    |
| Alcohol consumption                               |               |
| Weekly drinks, U.S. standard                      | 5.48 (6.37)   |
| Weekly drinks, U.K. standard                      | 9.58 (11.1)   |
| Excessive alcohol intake, U.S.                    | 2015 (5.5%)   |
| Excessive alcohol intake, U.K.                    | 9066 (24.7%)  |
| Liver-associated biomarker concentrations         |               |
| Alanine aminotransferase, IU/L                    | 23.0 (13.9)   |
| Aspartate aminotransferase, IU/L                  | 25.8 (10.5)   |
| Gamma glutamyltransferase, IU/L                   | 33.7 (33.9)   |
| Estimated untreated lipid concentrations          |               |
| Total cholesterol, mg/dL                          | 227 (40.7)    |
| LDL cholesterol, mg/dL                            | 144 (32.0)    |
| HDL cholesterol, mg/dL                            | 57.0 (14.5)   |
| Triglycerides, mg/dL                              | 126 [89-184]  |
| Glycemic biomarker concentrations                 |               |
| Glycated hemoglobin, %                            | 5.36 (0.475)  |
| Random glucose, mg/dL                             | 89.9 (17.5)   |

Values correspond to number (%), mean (standard deviation), or median [interquartile range]. Obesity was defined as body-mass index  $\geq 30$  kg/m<sup>2</sup> [1]; excessive alcohol intake, U.S. was defined as alcohol intake exceeding American Association for the Study of Liver Disease guidelines for NAFLD definition [2]; excessive alcohol intake, U.K. was defined as alcohol intake exceeding the UK Chief Medical Officers recommendations [3]. Diseases were defined as prevalent at time of initial assessment.

1. NHLBI Expert Panel (1998). Clinical Guidelines on the Identification, Evaluation, and Treatment of Overweight and Obesity in Adults--The Evidence Report. *Obes. Res.* 6 Suppl 2, 51S-209S.

2. Chalasani, N., Younossi, Z., Lavine, J.E., Charlton, M., Cusi, K., Rinella, M., Harrison, S.A., Brunt, E.M., and Sanyal, A.J. (2018). The diagnosis and management of nonalcoholic fatty liver disease: Practice guidance from the American Association for the Study of Liver Diseases. *Hepatology*. Baltimore, Md 67, 328–357.

3. Department of Health (2016). UK Chief Medical Officers' Low Risk Drinking Guidelines.

**Supplementary Table 3. F statistics and Steiger directionality test for studied traits**

| Exposure             | N_Exp   | R2    | IVs | F   | Correct_causal_<br>direction | Steiger_pval |
|----------------------|---------|-------|-----|-----|------------------------------|--------------|
| Body mass index      | 806834  | 0.037 | 312 | 99  | TRUE                         | 8.20E-29     |
| Waist-to-hip ratio   | 697734  | 0.046 | 581 | 58  | TRUE                         | 5.89E-03     |
| Type 2 diabetes      | 1407282 | 0.177 | 497 | 609 | TRUE                         | 5.10E-294    |
| Fasting insulin      | 196991  | 0.014 | 38  | 74  | TRUE                         | 7.01E-13     |
| Fasting glucose      | 196991  | 0.041 | 71  | 119 | TRUE                         | 1.01E-125    |
| HDL cholesterol      | 403943  | 0.142 | 480 | 139 | TRUE                         | 4.30E-159    |
| LDL cholesterol      | 440546  | 0.078 | 207 | 180 | TRUE                         | 3.76E-25     |
| Triglycerides        | 441016  | 0.105 | 399 | 130 | TRUE                         | 6.87E-58     |
| Smoking initiation   | 1232091 | 0.023 | 314 | 92  | TRUE                         | 2.58E-11     |
| Alcohol consumption  | 941280  | 0.003 | 84  | 34  | FALSE                        | 2.70E-05     |
| Coffee consumption   | 375833  | 0.005 | 12  | 157 | TRUE                         | 1.71E-11     |
| Caffeine consumption | 375833  | 0.005 | 24  | 79  | TRUE                         | 1.71E-11     |
| Strenuous sports     | 350492  | 0.002 | 6   | 117 | FALSE                        | 1.49E-04     |
| Television watching  | 422218  | 0.012 | 112 | 46  | TRUE                         | 3.43E-03     |

**Supplementary Table 4. Results of false discovery rate correction**

| Exposure                             | Original <i>P</i> value | Benjamini-Hochberg Adjusted | Significant using an FDR of 0.05? |
|--------------------------------------|-------------------------|-----------------------------|-----------------------------------|
| Waist-to-hip ratio                   | 2.26E-68                | 5.66E-67                    | Yes                               |
| Body mass index                      | 7.53E-24                | 9.41E-23                    | Yes                               |
| Type 2 diabetes                      | 3.74E-18                | 3.11E-17                    | Yes                               |
| Television watching                  | 4.82E-07                | 3.01E-06                    | Yes                               |
| Fasting insulin                      | 3.26E-06                | 1.63E-05                    | Yes                               |
| Triglycerides                        | 6.95E-06                | 2.90E-05                    | Yes                               |
| High-density lipoprotein cholesterol | 7.57E-06                | 2.70E-05                    | Yes                               |
| Lifetime smoking index               | 2.14E-05                | 6.67E-05                    | Yes                               |
| Smoking initiation                   | 2.19E-05                | 6.09E-05                    | Yes                               |
| Age of smoking initiation            | 3.35E-03                | 8.38E-03                    | Yes                               |
| Systolic blood pressure              | 4.68E-03                | 1.06E-02                    | Yes                               |
| CCB                                  | 8.51E-03                | 1.77E-02                    | Yes                               |
| Alcohol drinking                     | 9.88E-03                | 1.90E-02                    | Yes                               |
| Low-density lipoprotein cholesterol  | 1.89E-02                | 3.38E-02                    | Yes                               |
| BBs                                  | 3.77E-02                | 6.29E-02                    | No                                |
| Strenuous sports                     | 9.01E-02                | 1.41E-01                    | No                                |
| NPC1L1                               | 1.46E-01                | 2.15E-01                    | No                                |
| HMGCR                                | 2.70E-01                | 3.75E-01                    | No                                |
| Fasting glucose                      | 3.83E-01                | 5.04E-01                    | No                                |
| Caffeine consumption                 | 4.01E-01                | 5.01E-01                    | No                                |
| LDLR                                 | 4.41E-01                | 5.25E-01                    | No                                |
| PCSK9                                | 4.42E-01                | 5.02E-01                    | No                                |
| Cigarettes per day                   | 4.82E-01                | 5.24E-01                    | No                                |
| Coffee consumption                   | 8.54E-01                | 8.89E-01                    | No                                |
| ACEi                                 | 8.56E-01                | 8.56E-01                    | No                                |

Supplementary Table 5. Results of MR sensitivity analyses

| Exposure                             | SNPs | Cochran' Q | MR-Egger int P_intercept | Inverse weighted median |        |             | Weighted median |        |             |          |
|--------------------------------------|------|------------|--------------------------|-------------------------|--------|-------------|-----------------|--------|-------------|----------|
|                                      |      |            |                          | Beta                    | 95% CI | P           | Beta            | 95% CI | P           |          |
| <b>Metabolic factor</b>              |      |            |                          |                         |        |             |                 |        |             |          |
| Body mass index                      | 312  | 417        | 0.002                    | 0.120                   | 0.32   | 0.26-0.39   | 7.53E-24        | 0.29   | 0.18-0.4    | 3.09E-07 |
| Waist-to-hip ratio                   | 580  | 859        | 0.001                    | 0.525                   | 0.51   | 0.46-0.57   | 2.26E-68        | 0.47   | 0.4-0.55    | 2.06E-33 |
| Type 2 diabetes                      | 493  | 1644       | 0.004                    | 0.003                   | 0.15   | 0.12-0.19   | 3.74E-18        | 0.10   | 0.06-0.14   | 9.27E-08 |
| Fasting insulin                      | 38   | 121        | 0.011                    | 0.162                   | 0.75   | 0.43-1.07   | 3.26E-06        | 0.75   | 0.43-1.07   | 4.34E-06 |
| Fasting glucose                      | 69   | 122        | 0.004                    | 0.201                   | -0.06  | -0.19-0.07  | 0.383           | -0.03  | -0.18-0.13  | 0.737    |
| Systolic blood pressure_10mmHg       | 226  | 309        | -0.001                   | 0.791                   | 0.10   | 0.03-0.16   | 0.005           | 0.06   | -0.03-0.15  | 0.211    |
| High-density lipoprotein cholesterol | 480  | 1428       | -0.005                   | 3.13E-06                | -0.13  | -0.19--0.07 | 7.57E-06        | -0.10  | -0.17--0.03 | 0.004    |
| Low-density lipoprotein cholesterol  | 207  | 1118       | 0.008                    | 3.20E-04                | -0.11  | -0.2--0.02  | 0.019           | -0.11  | -0.19--0.04 | 0.002    |
| Triglycerides                        | 397  | 1471       | 0.008                    | 5.80E-09                | 0.15   | 0.09-0.22   | 6.95E-06        | 0.18   | 0.1-0.25    | 2.17E-06 |
| <b>Lifestyle factor</b>              |      |            |                          |                         |        |             |                 |        |             |          |
| Smoking initiation                   | 314  | 424        | -0.004                   | 0.077                   | 0.13   | 0.07-0.18   | 2.19E-05        | 0.10   | 0.02-0.18   | 0.015    |
| Age of smoking initiation            | 7    | 3          | 0.012                    | 0.363                   | -0.33  | -0.56--0.11 | 0.003           | -0.29  | -0.71-0.12  | 0.168    |
| Cigarettes per day                   | 19   | 29         | 0.005                    | 0.286                   | 0.03   | -0.05-0.1   | 0.482           | -0.02  | -0.11-0.07  | 0.695    |
| Lifetime smoking index               | 126  | 188        | 0.004                    | 0.333                   | 0.27   | 0.15-0.4    | 2.14E-05        | 0.21   | 0.05-0.37   | 0.012    |
| Alcohol drinking                     | 83   | 235        | -0.009                   | 0.005                   | 0.33   | 0.08-0.58   | 0.010           | 0.43   | 0.17-0.69   | 0.001    |
| Alcohol drinking_without_ADH1B       | 82   | 212        | -0.005                   | 0.281                   | 0.15   | -0.12-0.42  | 0.281           | 0.24   | -0.05-0.52  | 0.101    |
| Coffee consumption                   | 12   | 38         | -0.017                   | 0.078                   | 0.02   | -0.19-0.23  | 0.854           | 0.07   | -0.07-0.2   | 0.344    |
| Caffeine consumption                 | 24   | 63         | 0.004                    | 0.393                   | 0.06   | -0.07-0.19  | 0.401           | 0.04   | -0.06-0.14  | 0.392    |
| Caffeine consumption from tea        | 19   | 14         | -0.006                   | 0.181                   | 0.06   | -0.09-0.21  | 0.433           | 0.12   | -0.1-0.34   | 0.280    |
| Caffeine consumption from coffee     | 20   | 53         | 0.001                    | 0.884                   | 0.13   | -0.12-0.38  | 0.312           | 0.10   | -0.1-0.29   | 0.346    |
| Strenuous sports                     | 6    | 75         | -0.017                   | 0.776                   | -0.64  | -1.37-0.1   | 0.090           | -0.25  | -0.52-0.02  | 0.070    |
| Television watching                  | 112  | 224        | -0.002                   | 0.719                   | 0.36   | 0.22-0.5    | 4.82E-07        | 0.36   | 0.21-0.5    | 1.32E-06 |
| <b>Drug traget</b>                   |      |            |                          |                         |        |             |                 |        |             |          |
| β-blockers                           | 6    | 8          | -0.008                   | 0.684                   | -0.31  | -0.6--0.02  | 3.77E-02        | -0.25  | -0.56-0.06  | 1.15E-01 |
| Calcium-channel blockers             | 23   | 23         | 0.003                    | 0.579                   | -0.17  | -0.3--0.04  | 8.51E-03        | -0.15  | -0.35-0.05  | 1.31E-01 |

| Exposure                             | MR-Egger |             |          | MR-PRESSO<br>Outlier | MR-PRESSO |             |          | Contamination mixture |             |          |
|--------------------------------------|----------|-------------|----------|----------------------|-----------|-------------|----------|-----------------------|-------------|----------|
|                                      | Beta     | 95% CI      | P        |                      | Beta      | 95% CI      | P        | Beta                  | 95% CI      | P        |
| <b>Metabolic factor</b>              |          |             |          |                      |           |             |          |                       |             |          |
| Body mass index                      | 0.21     | 0.06-0.37   | 0.008    | 2                    | 0.31      | 0.25-0.37   | 1.53E-20 | 0.40                  | 0.29-0.47   | 4.18E-18 |
| Waist-to-hip ratio                   | 0.46     | 0.3-0.63    | 6.38E-08 | 3                    | 0.49      | 0.44-0.55   | 1.47E-57 | 0.50                  | 0.45-0.58   | 2.84E-47 |
| Type 2 diabetes                      | 0.06     | -0.01-0.13  | 0.079    | 8                    | 0.15      | 0.13-0.18   | 3.17E-31 | 0.16                  | 0.13-0.19   | 2.89E-31 |
| Fasting insulin                      | 0.11     | -0.82-1.04  | 0.817    | 1                    | 0.93      | 0.68-1.17   | 0.000    | 1.12                  | 0.86-1.44   | 1.45E-11 |
| Fasting glucose                      | -0.20    | -0.45-0.05  | 0.124    | 1                    | -0.02     | -0.14-0.1   | 0.797    | 0.02                  | -0.08-0.13  | 0.714    |
| Systolic blood pressure_10mmHg       | 0.13     | -0.13-0.38  | 0.323    | 0                    | 0.10      | 0.03-0.16   | 0.005    | 0.03                  | -0.04-0.11  | 0.380    |
| High-density lipoprotein cholesterol | 0.03     | -0.06-0.12  | 0.491    | 12                   | -0.17     | -0.21--0.13 | 2.94E-15 | -0.17                 | -0.2--0.13  | 6.04E-16 |
| Low-density lipoprotein cholesterol  | -0.30    | -0.43--0.16 | 0.000    | 15                   | -0.05     | -0.11-0     | 0.062    | -0.07                 | -0.11--0.02 | 0.015    |
| Triglycerides                        | -0.08    | -0.18-0.02  | 0.119    | 10                   | 0.26      | 0.21-0.3    | 4.63E-22 | 0.32                  | 0.28-0.42   | 2.45E-22 |
| <b>Lifestyle factor</b>              |          |             |          |                      |           |             |          |                       |             |          |
| Smoking initiation                   | 0.34     | 0.1-0.57    | 0.006    | 1                    | 0.12      | 0.06-0.18   | 4.71E-05 | 0.10                  | 0.04-0.19   | 0.002    |
| Age of smoking initiation            | -0.86    | -1.93-0.22  | 0.180    | 0                    | -0.33     | -0.56--0.11 | 0.026    | -0.33                 | -0.66-0     | 0.051    |
| Cigarattes per day                   | -0.03    | -0.16-0.1   | 0.634    | 0                    | 0.03      | -0.05-0.1   | 0.491    | 0.01                  | -0.05-0.18  | 0.636    |
| Lifetime smoking index               | 0.03     | -0.46-0.53  | 0.893    | 1                    | 0.26      | 0.13-0.38   | 6.39E-05 | 0.28                  | 0.15-0.4    | 2.12E-04 |
| Alcohol drinking                     | 0.92     | 0.46-1.38   | 2.01E-04 | 5                    | 0.30      | 0.09-0.51   | 0.006    | 0.33                  | 0.09-0.54   | 0.010    |
| Alcohol drinking_without_ADH1B       | 0.55     | -0.23-1.33  | 0.168    | 4                    | 0.24      | 0.03-0.46   | 0.027    | 0.33                  | 0.09-0.54   | 0.010    |
| Coffee consumption                   | 0.33     | -0.03-0.68  | 0.105    | 1                    | 0.08      | -0.05-0.21  | 0.265    | 0.05                  | -0.06-0.16  | 0.367    |
| Caffeine consumption                 | 0.00     | -0.17-0.18  | 0.978    | 2                    | 0.07      | -0.02-0.16  | 0.150    | 0.07                  | -0.01-0.14  | 0.095    |
| Caffeine consumption from tea        | 0.31     | -0.08-0.69  | 0.138    | 0                    | 0.06      | -0.09-0.21  | 0.443    | 0.09                  | -0.07-0.26  | 0.293    |
| Caffeine consumption from coffee     | 0.10     | -0.4-0.59   | 0.712    | 1                    | 0.20      | 0-0.39      | 0.061    | 0.13                  | -0.04-0.31  | 0.138    |
| Strenuous sports                     | -0.20    | -3.12-2.72  | 0.899    | 2                    | -0.38     | -0.55--0.22 | 0.020    | -0.31                 | -0.51--0.11 | 0.004    |
| Television watching                  | 0.48     | -0.19-1.15  | 0.163    | 1                    | 0.32      | 0.21-0.43   | 5.49E-08 | 0.32                  | 0.19-0.44   | 5.17E-07 |
| <b>Drug traget</b>                   |          |             |          |                      |           |             |          |                       |             |          |
| β-blockers                           | -0.09    | -1.12-0.95  | 0.878    | 0                    | -0.31     | -0.6--0.02  | 9.23E-02 | -0.31                 | -0.93-0     | 3.33E-03 |
| Calcium-channel blockers             | -0.26    | -0.58-0.07  | 0.137    | 0                    | -0.17     | -0.3--0.04  | 1.53E-02 | -0.20                 | -0.32--0.07 | 4.54E-03 |

CI, confidence interval; SNPs, single nucleotide polymorphisms.



**Supplementary Table 6. Sensitivity analysis of removing SNPs associated with liver fat at the loci-wide significance level**

| Exposure                | SNPs | Beta   | SE    | 95% CI      | P        |
|-------------------------|------|--------|-------|-------------|----------|
| <b>Metabolic factor</b> |      |        |       |             |          |
| Body mass index         | 310  | 0.319  | 0.032 | 0.26-0.38   | 1.20E-23 |
| Waist-to-hip ratio      | 577  | 0.487  | 0.028 | 0.43-0.54   | 9.73E-70 |
| Type 2 diabetes         | 488  | 0.134  | 0.012 | 0.11-0.16   | 1.79E-28 |
| Fasting insulin         | 36   | 0.878  | 0.127 | 0.63-1.13   | 4.79E-12 |
| Fasting glucose         | 68   | -0.016 | 0.061 | -0.14-0.1   | 7.97E-01 |
| Systolic blood pressure | 226  | 0.096  | 0.034 | 0.03-0.16   | 4.68E-03 |
| HDL cholesterol         | 473  | -0.148 | 0.021 | -0.19--0.11 | 1.89E-12 |
| LDL cholesterol         | 197  | -0.040 | 0.031 | -0.1-0.02   | 1.92E-01 |
| Triglycerides           | 388  | 0.230  | 0.027 | 0.18-0.28   | 8.34E-18 |
| <b>Lifestyle factor</b> |      |        |       |             |          |
| Smoking initiation      | 314  | 0.125  | 0.029 | 0.07-0.18   | 2.19E-05 |
| Alcohol drinking        | 79   | 0.271  | 0.112 | 0.05-0.49   | 1.53E-02 |
| Coffee consumption      | 11   | 0.077  | 0.066 | -0.05-0.21  | 2.38E-01 |
| Caffeine consumption    | 23   | 0.080  | 0.052 | -0.02-0.18  | 1.30E-01 |
| Strenuous sports        | 5    | -0.307 | 0.076 | -0.46--0.16 | 5.56E-05 |
| Television              | 111  | 0.319  | 0.055 | 0.21-0.43   | 5.37E-09 |

CI, confidence interval; SE, standard error; SNPs, single nucleotide polymorphisms.
